# Supplementary material for: Societal economic burden of hypertension at selected hospitals in southern Ethiopia: a patient-level analysis
Source: PubMed Central journal article supplement — BMJ Open. 2022 Apr 6;12(4):e056627. doi: 10.1136/bmjopen-2021-056627 (PMC8987749; doi:10.1136/bmjopen-2021-056627), 2022-04-06
Supplement: bmjopen-2021-056627.draft_revisions.pdf [file bmjopen-2021-056627.draft_revisions.pdf]

# BMJ Open

BMJ Open is committed to open peer review. As part of this commitment we make the peer review history of every article we publish publicly available.

When an article is published we post the peer reviewers' comments and the authors' responses online. We also post the versions of the paper that were used during peer review. These are the versions that the peer review comments apply to.

The versions of the paper that follow are the versions that were submitted during the peer review process. They are not the versions of record or the final published versions. They should not be cited or distributed as the published version of this manuscript.

BMJ Open is an open access journal and the full, final, typeset and author-corrected version of record of the manuscript is available on our site with no access controls, subscription charges or pay-per-view fees (<http://bmjopen.bmj.com>).

If you have any questions on BMJ Open's open peer review process please email [info.bmjopen@bmj.com](mailto:info.bmjopen@bmj.com)

# BMJ Open

## Societal Economic burden of hypertension at Selected Hospitals in Southern Ethiopia; a patient-level analysis

|                               |                                                                                                                                                                                                                                                                                                                                                                                                                                                                                                                                                                                                                                                                                                                       |
|-------------------------------|-----------------------------------------------------------------------------------------------------------------------------------------------------------------------------------------------------------------------------------------------------------------------------------------------------------------------------------------------------------------------------------------------------------------------------------------------------------------------------------------------------------------------------------------------------------------------------------------------------------------------------------------------------------------------------------------------------------------------|
| Journal:                      | <i>BMJ Open</i>                                                                                                                                                                                                                                                                                                                                                                                                                                                                                                                                                                                                                                                                                                       |
| Manuscript ID                 | bmjopen-2021-056627                                                                                                                                                                                                                                                                                                                                                                                                                                                                                                                                                                                                                                                                                                   |
| Article Type:                 | Original research                                                                                                                                                                                                                                                                                                                                                                                                                                                                                                                                                                                                                                                                                                     |
| Date Submitted by the Author: | 29-Aug-2021                                                                                                                                                                                                                                                                                                                                                                                                                                                                                                                                                                                                                                                                                                           |
| Complete List of Authors:     | Sorato, Mende; Arba Minch University, Pharmacy; Tehran University of Medical Sciences School of Pharmacy, Pharmacoeconomics and Pharmaceutical administration<br>Davari, Majid; Tehran University of Medical Sciences, Pharmacoeconomics and Pharmaceutical Management<br>Kebriaeezadeh, Abbas; Tehran University of Medical Sciences School of Pharmacy, Pharmacoeconomics and Pharmaceutical Management<br>Sarrafzadegan, Nizal; Isfahan University of Medical Sciences, Isfahan Cardiovascular Research Center; University of British Columbia, School of Population and Public Health, Faculty of Medicine<br>Shibiru, Tamiru; Arba Minch University, School of Medicine, College of Medicine and Health Sciences |
| Keywords:                     | Health economics < HEALTH SERVICES ADMINISTRATION & MANAGEMENT, HEALTH ECONOMICS, Cardiology < INTERNAL MEDICINE                                                                                                                                                                                                                                                                                                                                                                                                                                                                                                                                                                                                      |
|                               |                                                                                                                                                                                                                                                                                                                                                                                                                                                                                                                                                                                                                                                                                                                       |

SCHOLARONE™  
Manuscripts

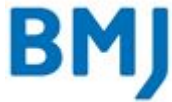

I, the Submitting Author has the right to grant and does grant on behalf of all authors of the Work (as defined in the below author licence), an exclusive licence and/or a non-exclusive licence for contributions from authors who are: i) UK Crown employees; ii) where BMJ has agreed a CC-BY licence shall apply, and/or iii) in accordance with the terms applicable for US Federal Government officers or employees acting as part of their official duties; on a worldwide, perpetual, irrevocable, royalty-free basis to BMJ Publishing Group Ltd ("BMJ") its licensees and where the relevant Journal is co-owned by BMJ to the co-owners of the Journal, to publish the Work in this journal and any other BMJ products and to exploit all rights, as set out in our [licence](#).

The Submitting Author accepts and understands that any supply made under these terms is made by BMJ to the Submitting Author unless you are acting as an employee on behalf of your employer or a postgraduate student of an affiliated institution which is paying any applicable article publishing charge ("APC") for Open Access articles. Where the Submitting Author wishes to make the Work available on an Open Access basis (and intends to pay the relevant APC), the terms of reuse of such Open Access shall be governed by a Creative Commons licence – details of these licences and which [Creative Commons](#) licence will apply to this Work are set out in our licence referred to above.

Other than as permitted in any relevant BMJ Author's Self Archiving Policies, I confirm this Work has not been accepted for publication elsewhere, is not being considered for publication elsewhere and does not duplicate material already published. I confirm all authors consent to publication of this Work and authorise the granting of this licence.

# Societal Economic burden of hypertension at Selected Hospitals in Southern Ethiopia; a patient-level analysis

## Authors

1. Mende Mensa Sorato\* (B.Pharm, MSc. PhD scholar at Tehran University of Medical Sciences)

Gmail: [mendemensa@gmail.com](mailto:mendemensa@gmail.com)

Address: Arba Minch University, College of Medicine and Health Sciences, Department of Pharmacy

**P.O.Box:** 21

**Address:** Arba Minch Ethiopia

2. Dr. Majid Davari (PharmD, PhD in Health/Pharmacoeconomics)

Email: [M-davari@tums.ac.ir](mailto:M-davari@tums.ac.ir)

Address: Tehran University of Medical Sciences, Faculty of Pharmacy, Department of Pharmacoeconomics and pharmaceutical Administration

3. Professor. Abbas Kebriaeezadeh (PharmD, PhD in Pharmacology)

Email: [kebriace@tums.ac.ir](mailto:kebriace@tums.ac.ir)

**Address:** Tehran University of Medical Sciences, Faculty of Pharmacy, Department of Pharmacoeconomics and pharmaceutical Administration.

4. Dr. Nizal Sarrafzadegan ( MTMD MPH, MD)

Email: [nsarrafzadegan@gmail.com](mailto:nsarrafzadegan@gmail.com)

Address: Director of Isfahan Cardiovascular Research Center, WHO Collaborating Center in EMR, Isfahan University of Medical Sciences

5. Dr. Tamiru Shibru (Internist)

Tel (cell): +251-911-70-47-67

Email: [drtamshib1@gmail.com](mailto:drtamshib1@gmail.com)

Address: Arba Minch University, *College of medicine and health sciences*

\* Corresponding Author

**Key Words:** Economic burden of Hypertension; Cost of Illness; Southern Ethiopia

**Word count:** 6,924

## I. Abstract

**Objectives:** There is inadequate information on the economic burden of hypertension treatment in Ethiopia. Therefore, this study was conducted to determine the economic burden of hypertension at Selected Hospitals in Southern Ethiopia.

**Methods:** Prevalence-based cost of illness (COI) study from a societal perspective was conducted. Disability-adjusted life years (DALYs) were determined by the current world health organization's recommended DALY valuation method. Adjustment for comorbidity and a 3% discount was done for DALYs. The data entry, processing, and analysis were done by using SPSS version 21.0 and Microsoft Excel 2013.

**Results:** We followed a cohort of 406 adult hypertensive patients retrospectively for 10 years from September 2010 to 2020. About two-thirds, 250 (61.6%) of patients were females with a mean age of  $55.87 \pm 11.03$  years ranging from 33 to 83 years. Less than 1 in five 71 (18.5%) of patients achieved their blood pressure control target. A total of 13,452,893.15 ETB (\$309,261.91) direct cost was incurred due to hypertension. A total of 11,606 years and 579.57 years were lost due to hypertension-related premature mortality and morbidity respectively. Treated and uncontrolled hypertension 44.6% (7826) total years lost due to premature mortality. This equates 845,490.39 ETB (\$19,436.56). Treated and uncontrolled hypertension accounted for one-half 2,937.72 (50.84%) of productive life years lost. Total productivity loss due to premature mortality and morbidity was 680,734,561.97 ETB (\$15,649,070.39).

**Conclusion:** Societal economic burden of hypertension in Southern Ethiopia was substantial. Indirect costs accounted for more than eight out of 10 dollars. Treated and uncontrolled hypertension took the lion's share of economic cost and productivity loss due to premature mortality and morbidity. Therefore, designing and implanting strategies for the prevention of hypertension, early screening, and detection, and improving the rate of blood pressure control by involving all relevant stakeholders at all levels is critical to saving scarce health resources.

### Strengths and limitations of this study

- Using the cardiovascular disease policy model adapted to Sub-Saharan African perspective by our research;
- Productivity loss costs associated with hypertension (premature mortality and morbidity) were included,
- All simulation variables and transition probability data obtained were obtained from valid sources (systematic reviews, randomized controlled trials, and prospective cohort studies). However,
- Our study might underestimate the national economic burden of hypertension because of uncertainty in age and sex-specific prevalence of undiagnosed hypertension and retrospective nature of direct cost data and probability of unrecorded procedures and tests.

## 1. Introduction

Hypertension doubles the risk of death from stroke, heart disease, vascular diseases, diabetes, atherosclerosis, and kidney disease for every increase of 20mmHg in systolic blood pressure (SBP) and/or increase of 10 mmHg in diastolic blood pressure (DBP) (1). According to the national STEPS survey the prevalence of hypertension among adults 15 years and above was 16% in Ethiopia. Only 28.4% of patients were taking antihypertensive medication prescribed by professionals. About 15.6% of individuals with high BP (SBP  $\geq$  140/90 mmHg) were not currently not on antihypertensive medication (2). According to the International Society of hypertension global hypertension practice guideline 2020, hypertension remains the leading cause of death globally, accounting for 10.4 million deaths per year (3). Similarly, according to a global health estimate in 2016, life years lost directly or indirectly due to hypertension was 42,781,885 in the African region. Regional productive healthy life year lost due to hypertension was estimated to be 19,395,946 (4, 5).

Hypertension is associated with societal and economic consequences particularly in Low and middle-income countries (LMICs). In addition to the direct costs associated with health care utilization for the management of complications, hypertension causes significant productivity loss from disability and premature death (6, 7). WHO report from South East Asian region also indicated huge impact of hypertension in national finances due to premature death, disability, personal and family disruption, loss of income, and healthcare expenditure (8). According to a WHO report in 2017, stroke caused 39,571 deaths or 6.23% of total deaths, coronary heart disease caused 46,943 deaths and hypertension caused 11,050 deaths (i.e. 30 patients per day) in Ethiopia (9).

Cost of illness (COI) study is used to measure the economic burden of disease to individuals, communities, and society as a whole. It can provide information to support the political process and healthcare decision-making if it is conducted from a societal perspective by using an appropriate approach and bottom-up costing strategy (10, 11). There is a consensus agreement for conducting any economic evaluation from a societal perspective. It is critical to include productivity costs into account to present results from this perspective (12). Cost of illness studies follow two different epidemiological approaches, prevalence or incidence approach, and we based prevalence based retrospective bottom-up costing approach in this study (13, 14). The human capital approach for the valuation of costs was used in this study (13, 15-18). In the human capital approach, the productivity losses associated with morbidity and mortality are the 'market value of that individual's future contribution to production in society if s/he had continued to work in full health (15). Despite this huge impact on national economies, the burden of hypertension is not studied in Ethiopia particularly Southern Ethiopia. To fill this evidence gap, this study was conducted to determine the economic burden of hypertension at selected public hospitals in Southern Ethiopia by using the prevalence-based cost-of-illness method from a societal perspective to estimate the direct and indirect costs of hypertension in a given year (2021) in Southern Ethiopia. This study will serve as a baseline study for the country to evaluate the economic burden of hypertension in Ethiopia.

## 2. Methods and Materials

### 2.1. Study design, Area and Period

A retrospective cohort study was conducted from September 2010- September 2020 in Southern Ethiopia to evaluate the economic burden of hypertension at selected three selected public hospitals. Prevalence-based retrospective cost of illness study from societal perspective focusing on quantifying direct and indirect costs. The bottom-up approach was used to estimate the economic burden of hypertension in Southern Ethiopia (figure 1). The human capital approach was used to calculate indirect costs separately in males and females and also among different age groups. A Prevalence-based COI model was constructed in which hypertensive patients will be simulated from diagnosis through active treatment, palliative care, and death over 15-64 years (i.e. productive age group of Ethiopian population).

Age and sex (in 5-year age groups) cohorts of the Ethiopian population aged 15-64 years were constructed, based on the 2020 Ethiopian population data. Age and sex-specific mortality rates, measures of productivity, and workforce statistics were used to simulate the progression of these cohorts until death or age 64 years. First, the model estimate cumulative years of life and DALYs lived for the working-age population who had hypertension. Then the model re-simulates with the hypothetical assumption that they did not have hypertension, with relevant changes to mortality rates and productivity. Key model parameters include the prevalence of hypertension, mortality rates, and utilization of antihypertensive therapies and other medical care resources, unit costs, workdays missed by patient and caregiver, and wage rates, workforce statistics, and measures of productivity. The differences in total years of life lived, and DALYs between the 2 cohorts reflect the impact of hypertension.

### 2.2. Study populations

The study populations were selected adult hypertensive patients at three selected public hospitals. According to the world population prospect 2020 estimate, the total population is 114,963, 583. About 43.21% (49,675,764) of the population belongs to age category 0-14 years. While, only 2.97% (3,414,418) were  $\geq 65$  years (19). In the same year, the Population of the Gamo zone accounted for 1.5% of the total population, Gofa, and South Omo Zone 1.5% of the Total Population. The target population is 3.0% total population of Ethiopia or 20% of the southern Ethiopian population (6,208,034). Based on age distribution: 0-14 years are children, 15-24 years are early working age, 25-54 years are prime working age, 55-64 years are mature working age and  $\geq 65$  years are elderly (20).

### 2.3. Inclusion and exclusion criteria

We included all adult hypertensive patients having at least five years of follow-up visits before data collection and receiving care during the study period from selected facilities. However, Patients who are unwilling to participate in this study, patients who have less than five years of follow-up, and incomplete patient records (don't contain follow-up BP records and refill medications, laboratory requests, and results) and illegible were excluded.

### 2.4. Study Variables

#### Dependent Variables

- Economic burden of hypertension

#### Independent variables

- Patient-related (socio-demographic characteristics, heart disease knowledge, healthy lifestyle and heart disease risk perception, presence of comorbidity, type of medications, treatment adherence, shared decision making, health-related quality Life)

#### Cost related variables

- **Medical costs** (inpatient hospital stay/hospitalization cost, outpatient clinic visit, drug acquisition costs, drug administration cost, laboratory test, and imaging study costs)
- **Non-medical costs** (transportation, meal, patient time cost due to treatment, cost due informal care by family or friends)
- **Indirect costs** (absenteeism, presenteeism, unemployment, early retirement, disability, premature death)

### 2.5. Sample Size and Sampling Technique

#### 2.5.1. Sample size determination

The sample size was determined by using the single population proportion formula by taking prevalence of patients controlled their BP as 14% from WHO 2016 BP control rate report (21-23) and Z value of 1.96 at 95% confidence interval. We added 10% for non-response rate and two for design effect due to multi-stage sampling technique involvement. Finally, a formula giving a larger sample size was used. Total 407 hypertensive adult patients who are on follow-up care will be included.

$$n = \frac{(Z\alpha/2)^2 P(1-P)}{d^2} = 185$$

$$= 185 + (185 * 10\%) = 203.5$$

$$= 203.5 * 2 = 407$$

Where: n = is the sample size

- **Z**= standard normal deviation, set at 1.96, correspond to the 95% confidence interval
- **d** = is the desired level of precision/margin of error (0.05)
- **p**= prevalence of patients taking anti-hypertensive (p=28.4%), and q is 1-p.



### 2.5.2. Sampling Techniques

A multi-stage simple random sampling technique was used. We randomly selected four zones from a total of 12 zones found in the Southern region. Four general hospitals with experience of providing CVD care for at least five years from selected four zones were included in this study. The total sample size was allocated to these hospitals based on an estimated number of adult hypertensive patients attending respective hospitals (i.e., we included 212 patients from Arba Minch General hospital, 107 patients from Jinka general hospital, and 88 patients from Sawula general hospital). Finally, a consecutive sampling technique was applied in each facility until the desired sample size was achieved.

### 2.6. Data collection tools and Procedures

Key model inputs variables include; 2020 population of selected Zones, hypertension prevalence by treatment and control status, Transition probabilities to death and healthy state, cost of diagnosis, and management. The data was collected from the National STEPS survey (2), systematic reviews (24-27), and our cohort study. Among those with treated hypertension, treated and controlled hypertension was defined based on BP control target of ISH 2020 guideline (i.e., controlled, if BP < 130/80 mmHg for < 65 years and < 140/90 mmHg for ≥ 65 years and uncontrolled, if BP ≥ 130/80 mmHg for < 65 years and ≥ 140/90 mmHg for ≥ 65 years). Morality rate in 2019 stratified by sex and 5-year age groups in selected zones was used. The demographic profile of the cohort was derived from the estimated resident population of Ethiopia in 2020. The rate of blood pressure control was drawn from the National STEPs 2015 survey (2) and our effectiveness study. Identified rates were applied to projections from 2019 United Nations World Population Prospects (28). Transition probabilities (TP) and relative risk of mortality were taken from the natural history of hypertension studies with good quality (20, 29-33).

We used national STPES risk factor survey data to estimate the prevalence of cardiovascular risk factors (MI, angina, heart failure, stroke, TIA). Incorporating the risk factor prevalence data in the relevant Framingham risk equation, the age and sex-specific probability of CHD and cerebrovascular disease (i.e., stroke and transient ischemic attack) events were estimated. Framingham risk equation was applied only for patients aged 30-79 years with no prior history of coronary heart disease (i.e. will not be used in patients with intermittent claudication or diabetes). The probability of each health state was calculated using the age- and sex-specific CHD and cerebrovascular disease event distributions (2, 34).

To estimate the corresponding probabilities, separate relative risk estimates were used for CHD events (Stable Angina, Unstable Angina, and MI) and cerebrovascular diseases (Stroke and Transient Ischemic Attack), assuming that antihypertensive treatment affects the probability of every disease state similarly across all age and sex groups. Relative risk reductions attributable to antihypertensive treatment were extracted from the peer-reviewed literature (33, 35, 36).

1  
2  
3 We estimated the probability of death separately for (1) all-cause mortality in absence of hypertension and  
4 related complications (general productive age population) and (2) mortality attributable to the included disease  
5 states. The first component was estimated using WHO Life Tables, and the second component was calculated  
6 based on standardized mortality ratios extracted from the literature. The natural history study conducted in  
7 1974 showed that the mortality rate was 1.85 (3.01 in males and 1.62 in females). The initial height of the  
8 diastolic blood pressure was a prognostic factor in the under-sixties. However, there were no increasing  
9 mortality rates with rising pressure in the over-sixties (20). Interventional trials suggested that it could be  
10 possible to achieve effective BP targets in about 70% of patients by improving adherence and/or intensifying  
11 therapy (29).  
12  
13  
14  
15  
16  
17

18 The 2020 world population prospect estimate was used for the baseline population and number of 33-year-olds  
19 projected to enter the model population from 2020-2070 (19). Coronary heart disease and stroke deaths in 2020  
20 were extracted from the national STEPS and WHO STEPS survey, and systematic reviews. Coronary heart  
21 disease deaths, stroke deaths, and all other deaths were considered non-CVD deaths. The annual probability of  
22 coronary heart disease and stroke was based on national STEPS survey data (2). If country-specific data are not  
23 available can be taken from well-accepted international studies like Framingham Heart Study (37) and the  
24 Framingham Offspring Study(38), by contextualizing to Ethiopian scenario (Supplementary Table 1).  
25  
26  
27  
28

29 Incident coronary heart disease events were allocated to angina pectoris, hospitalized myocardial infarction, or  
30 cardiac arrest. Prevalence, joint distributions, and means of Ethiopia risk factor values were estimated from the  
31 national STEPS survey (2). Annual transition rates between risk factor levels were calculated to preserve age-  
32 range trends over time. Betas for risk function for non-blood pressure risk factors were estimated separately  
33 for the risk of incident coronary heart disease events, incident strokes, and non-CVD deaths, using  
34 examinations 1-8 of the Framingham Offspring cohort (38).  
35  
36  
37  
38

39 Risk factors are assumed to affect the incidence of MI, arrest, and angina in proportion to the overall incidence of  
40 coronary heart disease, except tobacco smokers are assumed to have a higher relative risk for infarction and arrest  
41 (39); and a proportionately lower coefficient for angina. Environmental tobacco exposure is assumed to carry a  
42 relative risk of 1.26 for MI and cardiac arrest compared with non-exposed non-smokers (40) but not to influence  
43 angina. The number of hospitalized MI were obtained from the national STEPS survey (2), and our effectiveness  
44 study. Case-fatality rates and rates of MI in subgroups were estimated from national data and other complementary  
45 sources. Prehospital arrest deaths and out-of-hospital cardiac arrests surviving to hospital discharge were estimated  
46 from our effectiveness study.  
47  
48  
49  
50  
51  
52  
53  
54  
55  
56  
57  
58  
59  
60

1  
2  
3 Survival after a coronary heart disease event was estimated from national or international data sources (California  
4 data on the ratio of in-hospital survival to 30-day survival) (41) and calibrated based on findings of Huffman et al.  
5 2018 (42). Rates of coronary revascularizations was estimated from the National Hospital Discharge Survey, with  
6 mortalities estimated from aggregated historical data. Stroke incidence was assumed to be independent of the risk  
7 of new-onset coronary heart disease in the same year. The number of hospitalized strokes cases was obtained from  
8 national and regional studies. The annual probabilities of stroke after MI (43, 44) and the probability of coronary  
9 heart disease in stroke patients were based on natural history studies and systematic reviews of blood pressure  
10 control trials (45-50). 30-day heart failure mortality and re-hospitalization data were from the THESEUS-HF  
11 registry (51) and Korean Acute Heart Failure Registry (KorAHF)(52, 53) (Supplementary Table 2 and 3).

12  
13  
14  
15  
16  
17  
18 The background prevalence of CVD by age, sex, and CVD disease state (stroke, coronary heart disease, or both  
19 stroke and coronary heart disease) in 2020 was estimated from the National Health Survey data (2) and GBD 2017  
20 (54). The background prevalence of prior coronary revascularization was estimated from revascularizations before  
21 2019 and estimated survival after revascularization, while model projections were used to infer the distribution of  
22 revascularization by CVD state.

23  
24  
25  
26 Age and sex-specific health care costs were estimated using national data, and our effectiveness data. Hospitalized  
27 stroke and coronary heart disease costs and acute stroke rehabilitation costs were estimated using WHO Choice  
28 (55) inflated to 2021. In addition to this, Outpatient consultations (per visit), and inpatient stay and bed days were  
29 also estimated from WHO Choice (55) inflated to 2021. Chronic outpatient CVD costs additional to average  
30 background health care costs for the first year after the event and subsequent years were estimated for patients with  
31 a stroke or coronary heart disease diagnosis was pooled from the 2015 national STEPS survey. Average annual non-  
32 cardiovascular (background) costs were estimated from the national STEPS survey (2), and EDHS 2016 survey  
33 (20).

### 34 35 36 37 38 39 **Patient and public involvement**

40  
41 There was no identifiable patient involvement in this research. Patients' demographic characteristics and disease  
42 related variables were obtained by using questionnaire based interview after obtaining verbal consent from the  
43 patient. No patient identifier information was collected. Finally, most of variables were taken from published  
44 national and international literatures, and all relevant sources were acknowledged through citation.  
45  
46  
47  
48  
49  
50  
51  
52  
53  
54  
55  
56  
57  
58  
59  
60

### Cost estimation

The overall burden of hypertension was the total of all direct and indirect costs. The outcomes measures are total discounted societal costs, cost/year, and cost/patient-year. This is the amount of health budget that could be saved by effective prevention and control of hypertension. The direct costs were divided into two subcategories: direct medical costs and direct non-medical costs. Direct Medical costs include; inpatient stays, outpatient clinic visits, medical services, drug acquisition, dispensing, administration, monitoring, laboratory test, and imaging study costs. The costs associated with outpatient/inpatient visits were estimated by multiplying the numbers of outpatient visits related to hypertension by the outpatient costs per year (i.e., twelve times WHO cost per outpatient visit for secondary hospitals inflated to 2021) (55).

Data concerning medications prescribed for the management of hypertension, and associated comorbidities, and laboratory tests and imaging studies were done were collected by patient chart abstraction in index year (2020). The cost of medications used for management of hypertension and associated comorbidities was taken from Ethiopian Pharmaceutical supply agency Arba Minch regional hub selling price and retail price of Arba Minch General Hospital in 2020. The retail price of Arba Minch General Hospital was used because of the minimum distance from the Pharmaceutical supply agency hub, which could minimize markup added on retail price due to transportation cost. Costs of laboratory procedures were also taken from Arba Minch Hospital Laboratory's service price list. The prices of relevant laboratory tests and imaging studies were based on the average price of included Hospitals. The salary scale of the health workforce was based on the FMOH of Ethiopia (Supplementary Table 4).

Ongoing program costs for hypertension care (Health Promotion for CVD and diabetes, National Systems Response, and Monitoring and evaluation for CVD and diabetes care) was estimated from WHO tool outputs for CVD and diabetes care and National strategic action plan (NSAP) for prevention & control of non-communicable diseases in Ethiopia 2014-2016 and adjusted for 2021 inflation target population (56). Adjustment for the study population was done by multiplying the national cost by the proportion of the study population (i.e., 3%). National and regional cost estimates were based on the proportion of patients studied (i.e. 3% and 20%). We considered this strategy since the age and sex distribution of hypertension among different regions in the country is did not vary significantly. The collected cost data added up and averaged by using a bottom-up approach. Facility-based or reference costs were used during computing costs. The total medical cost of hypertension treatment was calculated as the sum of the product of medical costs with their respective unit prices. Costs were discounted at an annual rate of 3% and reported in 2021 USD (57, 58).

Direct non-medical costs include transportation costs and patient time costs due to care. The cost of patient time due to care was estimated by using the average daily wage of patients which was calculated from average monthly income (97.00 ETB) 34,931.00 annual income from our treatment effectiveness survey. Transportation cost was determined by using the cost of average traveling distance and local transportation tariff (42.00 ETB) in January

2021. According to EDHS 2016 survey showed that 33% of women and 88% of men are currently employed (20). This proportion was used to determine the patient time cost due to care for employed groups. For the unemployed proportion, the average daily wage of daily laborers workers working 8 hours per day for 6 days per week was used (26.53 ETB) from the monthly wage of 796.00 ETB (420-1172 ETB) (59).

Indirect costs include cost hospitalization, productivity loss due to illness, and cost of death. Cost-of hypertension-related hospitalization was taken from WHO Choice (55), costs per inpatient stay and cost per inpatient bed day times duration of hospitalization inflated for 2021, and professional time (physician, nurse laboratory professional, and pharmacist time). If a patient had multiple admissions during the year, the costs for each admission were aggregated as the total costs (60).

Age and sex-specific mortality rates among the adult general population in Ethiopia were taken from EDHS 2016 survey and extrapolated to selected populations (20). According to EDHS 2016, the probability of dying before age 50 years among adults  $\geq 15$  years were 10% and 12%, in Women and men respectively (20). Due to the absence of mortality data specific to hypertension treatment and control status in Ethiopia, mortality risk in the general population was attributed to those with and without hypertension using sex-specific estimates of the relative risk (RR) of all-cause mortality associated with hypertension by treatment and control status was derived from a study conducted in India was used (61). A cohort study conducted in India among adults 20 years and above to determine the Rate and Risk of all-cause mortality among people with HTN showed that the incidence of deaths in the study was 4.28% during the follow-up period of 6 years. The relative risk of mortality was 3.13 (CI: 2.91-3.37) and 1.2 in the high BP group and at age of 60 years. The age-adjusted hazard ratio of all-cause mortality for the high BP group was 2.96 (2.56-3.42) (61) (Supplementary Tables 5 and 6).

In 2020 crude death rate of the Ethiopian population-based on global estimates was 6.29 deaths per 1000 population (i.e. 680,032 deaths per 108,113,150) (62). The estimated prevalence of hypertension among adults was calculated from National STEPS Survey 2016, systematic review and meta-analysis, and World health organization report and local studies (19.6%, for 15-30 years, 23% for 30-40 years, 25.9% for 40-49 years and 41.9% for 50 years and above (2, 20, 61, 63-66). Supplementary Table 3). Only 28.4% of patients with the diagnosis are taking antihypertensive medication (2). The mean estimated prevalence of hypertension is 21.39%. The mean relative risk (hazard ratio) of all-cause mortality among the hypertensive population when compared to those without hypertension was 1.39 (0.95 to 1.95) (67).

Years of life lost due to hypertension morbidity was determined by first calculating disability weights for specific ages based on blood pressure control status (X). Then subtract this value (X) from the life expectancy of the Ethiopian population (i.e., 66.7 years for men, and 70.4 years for women) (Y). The productivity loss cost due to hypertension morbidity was calculated by multiplying Y with sex-specific employment rate based on a monthly average income of 2059.078 ETB from the National STEPS survey 2015 adjusted for 2021 inflation

(13,13/9.57=1.372) STEPS Survey, 2015 (2) and EDHS 2016 survey showed that 33% of women and 88% of men are currently employed (20) and for unemployed, 2019 minimum average monthly earnings (ETB) of daily laborers reported by the Ethiopian Ministry of Labor and Social Affairs (MOLSA) 796 ETB (420-1172 ETB) (59). Concerning, cost of productivity lost due to premature mortality: first we calculated potential years of life lost (YLL) by subtracting life expectancy from sex-specific age of death at which the death is recorded (Z). Then Z is multiplied by the number of deaths in each age group (Xi). Finally, we multiplied Xi with sex-specific employment rates like productivity loss due to hypertension-related morbidity above (68). Excess mortality and morbidity due to hypertension to hypertension were determined by subtracting age and sex-specific morbidity and mortality among the general population from the hypertensive cohort. Both were determined by using age, sex, and blood pressure treatment status mortality rate per 1000 person-years (Supplementary Table 6).

## 2.7. Morbidity adjustment

Patients with hypertension may have more than one disease, the addition of YLDs across causes may result in overestimation of the total loss of health (69). Therefore, it is recommended to estimate comorbidities using the assumption of independence within age-sex groups (4):

$$P_{1+2} = P_1 + P_2 - (P_1 \times P_2) = 1 - (1 - P_1) \times (1 - P_2)$$

- **Where**  $P_{1+2}$  is the prevalence of the two comorbid diseases 1 and 2,
- $P_1$  is the prevalence of disease 1 and  $P_2$  is the prevalence of disease 2.

The combined disability weight for individuals with multiple conditions is estimated assuming a multiplicative model as follows:

$$DW_{1+2} = 1 - (1 - DW_1) \times (1 - DW_2)$$

Since prevalence YLDs are calculated for each cause as:

$$YLD_i = DW_i \times P_i$$

- two preceding equations can be combined into a single calculation resulting in:

$$YLD_{1+2} = 1 - (1 - YLD_1) \times (1 - YLD_2)$$

## 2.8. Assumptions and Transition probabilities

The counterfactual comparator (hypothetical cohort of normotensive individuals) with a probability of developing CVD events among the general population. Both in case and comparator cohorts, the probability of non-CV death does not depend on the health state and is similar for both hypertensive and normotensive populations (70) and we chose not to model differential use of antihypertensive medication classes in order not



1  
2  
3 to bias cost-of-treatment inputs. Antihypertensive dose intensification and frequency of BP monitoring were  
4 based on ISH 2020 guidelines for blood pressure control. We did not simulate the effects of any particular  
5 medication; instead, we simulated “standard dose” effects and assumed average drug prices across classes (71).  
6 The amount of blood pressure change was assumed to be a function of the baseline BP and the effect of a  
7 standard-dose antihypertensive agent at that pre-treatment level (72). Patients with very high BP (mean SBP of  
8  $\geq 185$  mmHg) do not achieve the target of  $< 140$  mmHg even with taking four standard dose medications, these  
9 patients would on average achieve a BP of about 143 mmHg. We also assumed the medication adherence rate  
10 as 75% based on clinical trials (72).  
11  
12  
13  
14  
15

16 Other important assumptions include deaths reported or recorded on hospital registries were considered as  
17 hypertension-related unless specified as due to other cases; all disabilities in hypertensive patients were  
18 considered as disability due to hypertension except for comorbidities and accidents; cost of illness due to  
19 hypertension or associated morbidities were calculated based on the monthly earnings during data collection;  
20 all costs incurred before one year were adjusted/accounted to today’s value (2021 USD equivalent) and  
21 discounted at 3%; years of life lost and years of life lived with disability (YLDs) were not discounted as per the  
22 recent WHO recommendations.  
23  
24  
25  
26  
27

## 28 **2.9. Data Quality control, Processing, and Analysis**

29  
30 Questionnaires are prepared in English and the patient interview part of the questionnaire was translated into  
31 Amharic and translated back into English to check its consistency. The Amharic version of the patient interview  
32 questionnaire and English version of the health professional interview, data abstraction form, and health system  
33 interview questionnaires was used for data collection. The questionnaire was pretested on 30 adult hypertensive  
34 patients in Arba Minch General Hospital to ensure that the respondents could understand the questions and  
35 to check for consistency and possible amendments were made based on findings. Six professional nurses (BSc.)  
36 for data collection and one senior professional working in the respective health facilities for supervision were  
37 oriented before data collection about data collection approaches and contents of data collection format for one  
38 day by the principal investigator. Continuous follow-up and supervision were made by the principal investigator  
39 throughout the data collection period.  
40  
41  
42  
43  
44  
45

46 The collected data were checked for completeness and consistency by the principal investigator on daily basis  
47 at the spot during the data collection time. Then data were transcribed back to English for the patient interview  
48 part and entry was made using Epi-data 3.1 software. After data processing, analysis was done by using SPSS  
49 version 21.0 and Microsoft excel 2010. A summary of descriptive statistics was computed for most variables  
50 such as socio-demographic factors; professional factors structural factors, and health system factors; a bivariate  
51 analysis was done to determine the presence of an association between independent variables and hypertension  
52 treatment effectiveness.  
53  
54  
55  
56  
57

### 3. Results

#### 3.1. Description of study participants

In this study, we estimated the regional and national economic burden of hypertension (direct and indirect costs) by using the cardiovascular disease policy model adapted to the Sub-Saharan Africa perspective (73) (Supplementary Figure 1). Total costs of treated hypertension and hypertension-related excess mortality and years of life lost due to hypertension were determined. We followed a cohort of 406 hypertensive patients retrospectively for 10 years from September 2003 to 2013 Ethiopian calendar (September 2010-2020) for baseline assessment and simulated the cost of hypertension for lifelong from a societal perspective. About two-thirds, 250 (61.6%) of patients were females with a mean age of  $55.87 \pm 11.03$  years ranging from 33 to 83 years. Less than 1 in five 71 (18.5%) of patients achieved their BP control target based on international society of hypertension 2020 guidelines (Table 1).

**Table 1:** Patient characteristics and Disease related factors among adult hypertensive patients on regular follow-up at selected public hospitals in Southern Ethiopia (n=406)

| Sociodemographic factors                  |                                 | Frequency   |
|-------------------------------------------|---------------------------------|-------------|
| Sex                                       | Male                            | 156 (38.4%) |
|                                           | Female                          | 250 (61.6%) |
| Age in in years                           | Below 40 years                  | 15 (3.7%)   |
|                                           | 40- 65 years                    | 286 (70.4%) |
|                                           | 65 years and above              | 105 (25.9%) |
| Religion                                  | Orthodox                        | 215 (53.0%) |
|                                           | Muslim                          | 37 (9.1%)   |
|                                           | Protestant                      | 144 (35.5%) |
|                                           | Catholic                        | 10 (2.5%)   |
| Annual gross income before tax<br>(n=406) | Less than 12,000                | 117 (28.8%) |
|                                           | 12,000- 18,000                  | 89 (21.9%)  |
|                                           | 18,000- 23,000                  | 200 (49.2%) |
|                                           | Level of Education              | Illiterate  |
| Level of Education                        | Grades 1-8                      | 46 (11.3%)  |
|                                           | Grades 9-12                     | 22 (5.4%)   |
|                                           | College and above               | 73 (18.0%)  |
|                                           | Post-graduate degree            | 6 (1.5%)    |
|                                           | Occupation                      | Employed    |
| Merchant                                  |                                 | 63 (15.5%)  |
| Farmer                                    |                                 | 79 (19.5%)  |
| House wife                                |                                 | 149 (36.7%) |
| Disease related factors                   |                                 |             |
| Duration of hypertension since diagnosis  | 5 - 9 years                     | 262 (64.5%) |
|                                           | 10 - 14 years                   | 131(32.3%)  |
|                                           | 15 and above years              | 13 (3.2%)   |
| Family history of CVDs                    | 1 <sup>st</sup> degree relative | 133 (32.8%) |
|                                           | Second degree relative          | 16 (3.9%)   |
|                                           | None                            | 257 (63.3%) |
| Presence of comorbidities                 | Yes                             | 310 (76.4%) |



|                                                   |                                    |             |
|---------------------------------------------------|------------------------------------|-------------|
| (n=406)                                           | No                                 | 96 (23.6%)  |
| History of hospitalization                        | Yes                                | 250 (61.6%) |
|                                                   | No                                 | 156 (38.4%) |
| Duration of hospitalization<br>(n=250)            | Below 5 days                       | 56 (22.4%)  |
|                                                   | 5 to 10 days                       | 112 (44.8%) |
|                                                   | More than 10 days                  | 82 (32.8%)  |
| Target BP achieved based on<br>ISH 2020 guideline | Yes                                | 75 (18.5%)  |
|                                                   | No                                 | 331 (81.5%) |
| Antihypertensive regimen                          | Monotherapy                        | 136 (33.5%) |
|                                                   | Two drug combination               | 234 (57.6%) |
|                                                   | Three and more drug<br>combination | 36 (8.8%)   |

### 3.2. Cost of hypertension

#### 3.2.1 Direct (medical and non-medical) costs

Direct medical costs include program costs, cost of drugs for hypertension and comorbidities, laboratory costs, hospitalization costs, annual outpatient visit costs, and costs of medical supplies. A total of 2,820,430.57 ETB (\$ 64,837.48 USD) was incurred due to hypertension. Out of this, 80.0% (\$51,915.40 USD) was direct medical cost. From direct medical costs, annual outpatient visit cost 33.55% (\$17,419.73 USD), cost of comorbidity 26.21% (\$13,612.15 USD), and laboratory test costs 8.17% (\$4,263.29 USD) took the largest share. The regional and national annual estimated direct cost of hypertension were 14,102,151.90 ETB (\$324,187.40 USD) and 94,014,346.00 ETB (2,161,249.33 USD) respectively (Table 2). Details of cost estimations and costs were available on online-only supplementary file (Supplementary Table 2 and 3).

**Table 2:** Direct annual costs of treating hypertension among adults in Southern Ethiopia, January 2021 (n=406)

| Cost category                  | Annual total in ETB<br>Total (mean $\pm$ Standard deviation) | Annual cost<br>in July 2021<br>USD | Estimated<br>national<br>cost USD<br>2021 | Percentage<br>from total<br>direct cost |
|--------------------------------|--------------------------------------------------------------|------------------------------------|-------------------------------------------|-----------------------------------------|
| <b>Direct medical total</b>    | <b>2,258,319.97</b>                                          | 51,915.40                          | 1,730,513.39                              | 80.0%                                   |
| Program costs                  | 403,275.70 (993.0 $\pm$ 0.00)                                | 9,173.40                           | 305,780.00                                |                                         |
| Cost of antihypertensives      | 119,847.64 (295.19 $\pm$ 107.78)                             | 2,726.20                           | 90,873.33                                 |                                         |
| Cost of drugs for comorbidity  | 598,409.00 (2266.7 $\pm$ 1114.52)                            | 13,612.15                          | 453,738.33                                |                                         |
| Cost for hospitalization       | 179,377.03 (3360.76 $\pm$ 1594.69)                           | 4,080.33                           | 136,011.00                                |                                         |
| Laboratory tests               | 187,420.00 (461.63 $\pm$ 226.98)                             | 4,263.29                           | 142,109.67                                |                                         |
| Annual outpatient visit costs  | 765,795.60 (1886.20 $\pm$ 0.00)                              | 17,419.73                          | 580,657.67                                |                                         |
| Cost of medical supplies       | 4,195.00 (85.60 $\pm$ 0.00)                                  | 95.42                              | 3,180.67                                  |                                         |
| <b>Professional time total</b> | <b>128,362.01</b>                                            | 2,950.85                           | 98,361.69                                 | 4.6%                                    |
| Physician time                 | 92,032.08 (226.68 $\pm$ 0.00)                                | 2,093.47                           | 69,782.33                                 |                                         |
| Nurse time                     | 2,060.28 (43.84 $\pm$ 17.81)                                 | 46.87                              | 1,562.33                                  |                                         |
| Pharmacy time                  | 4,453.01 (10.97 $\pm$ 0.00)                                  | 101.29                             | 3,376.33                                  |                                         |
| Laboratory time                | 29,816.64 (73.44 $\pm$ 0.00)                                 | 678.25                             | 22,608.33                                 |                                         |

|                                                              |                                      |           |              |               |
|--------------------------------------------------------------|--------------------------------------|-----------|--------------|---------------|
| <b>Direct non-medical costs</b>                              | <b>433,748.59</b> (1068.84 ± 384.78) | 9,866.58  | 328,886.00   | <b>15.37%</b> |
| Total direct cost of treated hypertension                    | 2,820,430.57                         | 64,837.48 | 2,161,249.33 | 100.00%       |
| 1USD= 43.9614 ETB on July 13, 2021                           |                                      |           |              |               |
| <b>ETB:</b> Ethiopian Birr; <b>USD:</b> United States Dollar |                                      |           |              |               |

### 3.2.2. Life years lost due to premature mortality and morbidity

We determined the years of life lost due to premature mortality (excess mortality) and years of life lost due to hypertension morbidity for the productive age population (30-64 years) among a cohort of simulated adult hypertensive patients. The excess mortality and years of life lost were different among the hypertensive cohort and simulated population with no hypertension. A total of 11,858 (6,159, men; 5,699 women) years were lost due to hypertension-related premature mortality among 30-64 years old adults with hypertension. This equates 18,660,182.62 ETB (11,748,345.71 ETB, men; 96,911,836.90 ETB, women). The estimated regional life years lost due to premature mortality is 59,290.00. This is equivalent to 93,300,913.01 ETB (\$2,144,848.58 USD). Similarly, if the result is extrapolated to national value, the national estimated life years lost due to premature mortality is 395,267 resulting in 622,006,087.33 ETB (\$14,298,990.51 USD). From 15,232 years lost due to premature mortality in the hypertension cohort more than one-half of related deaths, 12,656 (83.1%) were due to treated hypertension. Treated and uncontrolled hypertension accounted for more than 6,824 (44.8%) total years lost due to premature mortality followed by treated hypertension 5,832 (38.29%) and untreated hypertension 2,575 (16.9%).

A total of 579.57 (205.24 men; 374.33 women) years of life were lost due to hypertension morbidity. This equates to 845,490.39 ETB (\$19,436.56) The estimated regional and national YLL due to hypertension morbidity were 2897.85 equating 4,227,451.95 ETB (\$97,182.80 USD) and 19,319, equating 28,183,013.16 ETB (\$647,885.36 USD) respectively. More than two-thirds 70.94% (4,099.3) of total life years lost among the hypertension cohort was due to treated hypertension. Untreated hypertension accounted for 1,679.28 (507.95 men, 1171.33 women) years of life lost. Treated and uncontrolled hypertension accounted for one-half 2,937.72 (50.84%) of productive life years lost, followed by untreated hypertension 1,679.28 (29.06%). Details of input variables are available in the online-only supplementary file (Supplementary Table 3, 4, and 5). Treated uncontrolled hypertension contributed to more YLL due to premature mortality in both sexes 6,824 (44.8%), and life years lost due to hypertension morbidity 2, 9378(50.84%) (Figure 2).

Total productivity loss due to premature mortality and morbidity was 19,505,673.01 ETB (\$449,394.69 USD).

Overall hypertension related economic burden in the study area was 22,326,103.39 ETB (\$513,243.75 USD).

The regional and national estimated total annual economic burden was 111,630,516.95 ETB (\$2,566,218.78 USD) and 744,203,446.33 ETB (\$17,108,125.203 USD). More than eight out of ten 87.37% dollars were due productivity loss (i.e., premature mortality and morbidity) (Table 3, 4 and 5).

**Table 3:** Excess deaths among adult hypertensive by treatment and control status over the working lifetime simulated from life table modelling in Southern Ethiopia

| Age group            | Deaths in hypertension cohort | Deaths in 'hypertension cohort' assuming no hypertension | Excess deaths in those with hypertension | Deaths in those with to hypertension by treatment and control status * |                          |           |
|----------------------|-------------------------------|----------------------------------------------------------|------------------------------------------|------------------------------------------------------------------------|--------------------------|-----------|
|                      |                               |                                                          |                                          | Treated and controlled                                                 | Treated and uncontrolled | Untreated |
| <b>Men</b>           |                               |                                                          |                                          |                                                                        |                          |           |
| 30-34                | 1,436                         | 448                                                      | 988                                      | 487                                                                    | 654                      | 294       |
| 35-39                | 1,180                         | 381                                                      | 799                                      | 401                                                                    | 537                      | 242       |
| 40-44                | 1,027                         | 428                                                      | 599                                      | 357                                                                    | 479                      | 191       |
| 45-49                | 1,735                         | 224                                                      | 1,511                                    | 1,167                                                                  | 405                      | 162       |
| 50-54                | 989                           | 166                                                      | 823                                      | 370                                                                    | 496                      | 123       |
| 55-59                | 731                           | 123                                                      | 608                                      | 274                                                                    | 367                      | 91        |
| 60-64                | 932                           | 101                                                      | 831                                      | 362                                                                    | 443                      | 127       |
| Total                | 8,030                         | 1,871                                                    | 6,159                                    | 3,418                                                                  | 3,381                    | 1,230     |
| <b>Women</b>         |                               |                                                          |                                          |                                                                        |                          |           |
| 30-34                | 1,401                         | 415                                                      | 986                                      | 434                                                                    | 657                      | 310       |
| 35-39                | 1,187                         | 212                                                      | 975                                      | 368                                                                    | 556                      | 263       |
| 40-44                | 1,019                         | 287                                                      | 731                                      | 324                                                                    | 490                      | 205       |
| 45-49                | 832                           | 279                                                      | 554                                      | 265                                                                    | 400                      | 168       |
| 50-54                | 887                           | 91                                                       | 796                                      | 350                                                                    | 400                      | 137       |
| 55-59                | 805                           | 72                                                       | 733                                      | 277                                                                    | 419                      | 109       |
| 60-64                | 1,071                         | 147                                                      | 924                                      | 396                                                                    | 521                      | 153       |
| Total                | 7,202                         | 1,503                                                    | 5,699                                    | 2,414                                                                  | 3,443                    | 1,345     |
| <b>Box sex total</b> | 15,232                        | 3,374                                                    | 11,858                                   | 5,832                                                                  | 6,824                    | 2,575     |

\* Excess deaths are all-cause deaths observed in those with hypertension compared to the same cohort assuming no hypertension

**Table 4:** Years of life lost (YLL) by adults with hypertension by treatment and control status over the lifetime simulated from life table modelling in Southern Ethiopia

| Age group    | Years of life lived in treated hypertension cohort | Years of life lived in 'hypertension cohort' assuming no hypertension | YLL lost to Treated hypertension (excess) | YLL lost due to hypertension by treatment and control status * |                          | Years of life lived in untreated hypertension cohort | YLL lost due to Untreated hypertension |
|--------------|----------------------------------------------------|-----------------------------------------------------------------------|-------------------------------------------|----------------------------------------------------------------|--------------------------|------------------------------------------------------|----------------------------------------|
|              |                                                    |                                                                       |                                           | Treated and controlled                                         | Treated and uncontrolled |                                                      |                                        |
| <b>Men</b>   |                                                    |                                                                       |                                           |                                                                |                          |                                                      |                                        |
| 33-39        | 199.87                                             | 181.2                                                                 | 18.67                                     | 141.34                                                         | NA                       | 122.67                                               | 58.53                                  |
| 40-44        | 357.48                                             | 324.1                                                                 | 33.38                                     | 235.09                                                         | 17.71                    | 219.42                                               | 104.68                                 |
| 45-49        | 587.08                                             | 522.5                                                                 | 64.58                                     | NA                                                             | 418.31                   | 353.73                                               | 168.77                                 |
| 50-54        | 341.9                                              | 295.3                                                                 | 46.6                                      | NA                                                             | 246.52                   | 199.92                                               | 95.38                                  |
| 55-59        | 161.63                                             | 140.1                                                                 | 21.53                                     | NA                                                             | 116.38                   | 94.85                                                | 45.25                                  |
| 60-64        | 129.88                                             | 109.4                                                                 | 20.48                                     | NA                                                             | 94.54                    | 74.06                                                | 35.34                                  |
| Total        | 1777.84                                            | 1572.6                                                                | 205.24                                    | 376.43                                                         | 893.46                   | 1,064.65                                             | 507.95                                 |
| <b>Women</b> |                                                    |                                                                       |                                           |                                                                |                          |                                                      |                                        |
| 33-39        | 318.33                                             | 288.6                                                                 | 29.73                                     | 225.11                                                         | NA                       | 195.38                                               | 93.22                                  |
| 40-44        | 791.95                                             | 718                                                                   | 73.95                                     | 560.04                                                         | NA                       | 486.09                                               | 231.91                                 |
| 45-49        | 1147.34                                            | 1040.2                                                                | 107.14                                    | NA                                                             | 811.36                   | 704.22                                               | 335.98                                 |
| 50-54        | 953.59                                             | 863.8                                                                 | 89.79                                     | NA                                                             | 674.58                   |                                                      | 279.01                                 |
| 55-59        | 491.71                                             | 445.8                                                                 | 45.91                                     | NA                                                             | 347.72                   | 309.52                                               | 143.99                                 |
| 60-64        | 297.81                                             | 270                                                                   | 27.81                                     | NA                                                             | 210.6                    | 182.79                                               | 87.21                                  |
| Total        | 4,000.73                                           | 3626.4                                                                | 374.33                                    | 785.15                                                         | 2,044.26                 | 1,878.00                                             | 1,171.32                               |
| Grand total  | 5,778.57                                           | 5199                                                                  | 579.57                                    | 1161.58                                                        | 2,937.72                 | 2,942.65                                             | 1,679.27                               |

NA= No patient is reported in this age group; \* YLL=years of life lost by those with hypertension compared to the same cohort assuming no hypertension.

**Table 5:** Productivity loss associated premature mortality and hypertension morbidity, Southern Ethiopia, January, 2021

| Variable                                 | Sex                     | Excess Years lost | Lost productivity ETB | Lost productivity in 2021 USD |
|------------------------------------------|-------------------------|-------------------|-----------------------|-------------------------------|
| Years lost due to premature mortality    | Male                    | 6,159             | 11,748,345.71         | \$270,699.21                  |
|                                          | Female                  | 5,699             | 6,911,836.90          | \$159,258.91                  |
|                                          | Both                    | 11,858            | 18,660,182.62         | \$429,958.12                  |
| Years lost due to hypertension morbidity | Male                    | 205.24            | 391,497.07            | \$8,999.93                    |
|                                          | Female                  | 374.33            | 453,993.32            | \$10,436.63                   |
|                                          | Both                    | <b>579.57</b>     | 845,490.39            | \$19,436.56                   |
|                                          | Total productivity loss |                   | 19,505,673.01         | \$449,394.69                  |
| 1USD=43.5 ETB                            |                         |                   |                       |                               |

**Note:** productivity loss is calculated by taking 88% employment rate for men, 33% employment rate for women. Monthly wage of employed 2059.078 from EDHS 2016 and National STEPS survey 2015 which is adjusted for current inflation (1.3689). Unemployment/unpaid monthly wage of 796 ETB

#### 4. Discussion

In this prevalence-based retrospective cost of illness study from a societal perspective focusing on quantifying direct and indirect costs by the bottom-up approach, we estimated the economic burden of hypertension among

1  
2  
3 hypertensive productive age (15-64 years) population of Southern Ethiopia. A total of 2,820,430.57 ETB (\$  
4 64,837.48 USD) direct cost were incurred due to hypertension annually. Out of direct costs, 80.0% (\$51,915.40  
5 USD) was direct medical cost. Total monthly hypertension treatment cost was 188, 193.33 ETB (\$4326.28  
6 USD). From the direct medical costs, annual outpatient visit cost 33.55% (\$17,419.73 USD), cost of  
7 comorbidity 26.21% (\$13,612.15 USD), and laboratory test costs 8.17% (\$4,263.29 USD) took the largest share.  
8 The regional and national annual estimated direct cost of hypertension were 14,102,151.90 ETB (\$324,187.40  
9 USD) and 94,014,346.00 ETB (2,161,249.33 USD) respectively. Similarly, a total productivity loss due to  
10 premature mortality and morbidity was 19,505,673.01 ETB (\$449,394.69).  
11  
12  
13  
14  
15

16 In our study, the total monthly hypertension treatment cost was 188, 193.33 ETB (\$4326.28). This is less than  
17 findings from the cost of illness study conducted to determine the economic burden of hypertension among  
18 202 hypertensive patients receiving antihypertensive treatment at Government Hospital in Ghana that showed  
19 that the total monthly treatment cost of \$6,356.30 (74). Our finding is also less than findings from a study  
20 conducted to calculate the healthcare costs attributable to hypertension in the province of Alberta, Canada (>3  
21 million residents) and to project these costs to 2020 showed that hypertension annual individual healthcare cost  
22 of which \$ 2341 (41% of overall individual healthcare cost) (75). Similarly, a study conducted on the economics  
23 of hypertension in the USA showed that relative to individuals without hypertension, individuals with  
24 hypertension had \$1,920 higher annual adjusted incremental expenditure (76). This variation could be explained  
25 by variation in socioeconomic status and population health status, and our findings could underestimate both  
26 costs and health-related life loss due to the asymptomatic nature of hypertension (77) and a significant number  
27 of undiagnosed hypertension among adults globally and nationally.  
28  
29  
30  
31  
32  
33  
34

35 Overall hypertension-related annual economic burden in the study area was 22,326,103.39 ETB (\$513,243.75  
36 USD). The regional and national estimated total annual economic burden was 111,630,516.95 ETB  
37 (\$2,566,218.78 USD) and 744,203,446.33 ETB (\$17,108,125.203 USD) respectively. To mean that the  
38 prevention of hypertension could result in annual \$17,108,125.203 national economic savings. Cepheus  
39 research team reported that, the Ethiopian parliament approved on July 8, 2019, a federal government budget  
40 of Birr 387 billion ETB. Out of this 12.8 billion ETB is allocated for the Health sector (78). Hypertension  
41 accounted for 5.8% (744,203,446.33 ETB) of total national health care budget. World health organization  
42 estimated the implementation cost of best buys in low-income countries to be about 4% of the national health  
43 care budget. This highlights the urgent need of designing and implementing strategies believed to improve  
44 blood pressure control and prevention of hypertension.  
45  
46  
47  
48  
49  
50

51 In our study, indirect cost accounted for more than three fourth of hypertension-related costs 87.37%  
52 (\$14,946,875.67) followed by direct medical costs 10.12% (\$51,915.40). About a half of the costs associated  
53 with cardiovascular disease burden are caused by direct healthcare costs, 26% by work productivity losses, and  
54  
55  
56  
57  
58  
59  
60

1  
2  
3 21% by informal care. Even though the loss of productivity results in a significant burden for individual CVD  
4 patients, their families, caregivers, and society as a whole, it is a relatively underexplored topic (79).

6  
7 Concerning costs of treatment 80.0% (\$51,915.40) of the cost was direct medical. This is similar to findings  
8 from a cost of illness study conducted at a Government Hospital in Ghana that direct cost accounting for  
9 almost 70% of the total cost of managing hypertension accompanied by a moderate intangible cost as reported  
10 by most of the patients (74). Similarly, a study conducted to estimate the economic burden of hypertension in  
11 a given year in rural Yunnan Province of China showed that direct costs represented the largest component of  
12 the economic cost of hypertension (80).

13  
14  
15  
16  
17 In addition to this, we found that the societal cost of hypertension is more pronounced than the healthcare  
18 costs since more than 8 out of ten dollars were due to productivity loss associated with hypertension. Therefore,  
19 it is important to promote existing strategies and develop country-specific strategies for hypertension  
20 prevention. Strategies believed to prevent the development of hypertension include; annual screening of the  
21 high-risk population, promoting healthy lifestyles (healthy eating, physical activity, weight reduction,  
22 psychosocial determinants including stress and anxiety, managing and controlling comorbid illnesses like  
23 diabetes, chronic kidney disease, and HIV/AIDS). In our recent scoping review we also identified the reasons  
24 for poor blood pressure control in Eastern Sub-Saharan Africa: Looking into 4P's (Primary care, Professional,  
25 Patient, and Public health policy) for improving blood pressure control (81). Addressing these multi-sectoral  
26 factors to improve the current low-level population awareness about hypertension (< 50% in Sub-Saharan  
27 Africa) (82, 83) and setting strategies for screening adults for hypertension to address undiagnosed hypertension  
28 and early initiation of treatment to reduce associated complication and comorbidities (84) which were  
29 contributing for direct costs significantly by focusing on preventive approach could help to avoid/reduce the  
30 economic burden of hypertension Ethiopia. In addition to this improving level of blood pressure control,  
31 through care standardization and adherence improving initiatives can also help to reduce hypertension-related  
32 complications, since only 18.5% of patients in this study achieved their BP control level. This is supported by  
33 evidence from a review and commentary done on the State of hypertension in Sub-Saharan Africa which stated  
34 the importance of increasing availability of voluntary blood pressure monitoring with low-cost devices,  
35 continued public health initiatives to build and expand patient education on the importance of hypertension  
36 management (85). This requires improved commitment from policy level managers which is low in Sub-Saharan  
37 Africa (81)

38  
39  
40 Concerning pre-mature mortality, A total of 11,606 (5,415, men; 6,190 women) years were lost due to  
41 hypertension-related premature mortality (917,756) among the regional target population 30-64 years. This  
42 equates 23,635,743.87 ETB (14,388,356.78 ETB, men; 9,247,387.08 ETB, women). Concerning health-related  
43 life loss, about 26,678 (81.79%) deaths per study population were due to hypertension and related  
44  
45  
46  
47  
48  
49



1  
2  
3 complications. This is higher than the number of hypertension-related death occurred in 2017, which as 11,050  
4 (9). This could be explained by the increasing trend of hypertension in the country. From 15,232 years lost due  
5 to premature death in the hypertension cohort more than one-half of related deaths, 12,656 (83.1%) were due  
6 to treated hypertension. Treated and uncontrolled hypertension 6,824 (44.8%) total years lost due to premature  
7 mortality followed by treated and controlled hypertension 5,832 (38.3%) and untreated hypertension 2,575  
8 (16.9%). Treated and uncontrolled hypertension contributed to premature mortality 6,824 (44.8%), and life  
9 years lost due to hypertension morbidity 2, 9378(50.84%) in both sexes. This is supported by evidence from  
10 other studies that revealed uncontrolled blood pressure cost \$370 billion globally in 2001 (i.e. about 10% of the  
11 global health expenditure) (86). This is because the relative risk of all-cause mortality is higher among treated  
12 and uncontrolled (1.62) than untreated (1.40) and treated controlled (1.12) patients (67).  
13  
14  
15  
16  
17  
18

19 Untreated hypertension accounted for 1,679.28 (507.95 men, 1171.33 women) years of life lost. Treated and  
20 uncontrolled hypertension accounted for one-half 2,937.72 (50.84%) of productive life years lost, followed by  
21 untreated hypertension 1,679.28 (29.06%). This is supported by evidence from global health in 2016, productive  
22 healthy life year lost due to hypertension was estimated to be 181,813,158 (35.85%). Similarly, in the African  
23 region, DALYs attributed to hypertension were 42,781,885 (24.60%) of NCD-related Healthy life years lost.  
24 Productive healthy life year lost due to hypertension was estimated to be 19,395,946 (45.8%) (4, 5). A study  
25 conducted to estimate the economic burden of hypertension in a given year in rural Yunnan Province of China  
26 showed that the overall prevalence of and YLL/1000 population because of hypertension was 24.8% and 1.5  
27 years for the survey population, respectively (80).  
28  
29  
30  
31  
32  
33

34 A total of 579.57 (205.24 men; 374.33 women) years of life were lost due to hypertension. The estimated nation  
35 life years lost due to hypertension is 19,319. This equates 36,818,990.01 ETB (\$846,413.56) (18,178,309.30 ETB  
36 men; 18,640,680.71 ETB women). This is supported by evidence from A study conducted among working-age  
37 (20 to 69 years) Australians with hypertension showed that hypertension caused the loss of 609,801  
38 productivity-adjusted life years (2.4%), equating to AUD\$ 137.2 billion in the lost gross domestic product over  
39 the working lifetime (87). Therefore, prevention of hypertension and improving the rate of blood pressure  
40 control is important to reduce hypertension-related complications and productive life-year loss in the region as  
41 well as in the country (88). A systematic review conducted to determine productivity losses associated with the  
42 cardiovascular disease showed that annual population-level morbidity and mortality-related costs (2015 prices)  
43 reported in the studies ranged from US\$56.3 billion in the European Union to US\$132.3 billion in the USA. A  
44 total annual cost has been estimated at US\$389.6 billion (2010 prices) globally. These findings suggest that  
45 economic evaluations that only consider cardiovascular (CV) deaths and fail to account for reduced productivity  
46 among people with CVD who continue working will underestimate the total cost of illness associated with  
47 CVD and cost-effectiveness of CVD prevention or treatment (89).  
48  
49  
50  
51  
52  
53  
54  
55  
56  
57  
58  
59  
60

1  
2  
3 According to the Global Health Estimates technical paper released by WHO in 2018, there were 2,668,475,493  
4 healthy life years were lost globally due to all causes of mortality. From this 1,595,534,582 (60%) deaths were  
5 due to NCDs. Healthy life years lost (DALY) directly or indirectly attributed to hypertension were 507,133,202  
6 (31.78%) of NCD-related Healthy life years lost. Productive healthy life year lost due to hypertension is  
7 estimated to be 181,813,158 (35.85%). Similarly, there were 173,865,592 healthy life years were lost due to  
8 to NCDs. Healthy life years lost (DALY) directly or indirectly attributed to hypertension were 42,781,885  
9 (24.60%) of NCD-related Healthy life years lost. Productive healthy life year lost due to hypertension was  
10 estimated to be 19,395,946 (45.8%) (4, 5).  
11  
12  
13  
14  
15

## 16 **5. Conclusion**

17  
18 The societal economic burden of hypertension in Southern Ethiopia was substantial. Indirect costs accounted  
19 for more than eight out of 10 dollars economic burden. Hypertension accounted for 5.8% of the total national  
20 health care budget. Treated and uncontrolled hypertension took the lion's share of economic cost and  
21 productivity loss due to premature mortality and morbidity. Prevention of hypertension could result in annual  
22 \$17,108,125.203 national economic savings. Therefore, designing and implanting strategies for prevention of  
23 hypertension, early screening, and detection, and improving the rate of blood pressure control by involving all  
24 relevant stakeholders at all levels (national, regional, zonal, community, and patient-level) is critical to saving  
25 scarce health resources.  
26  
27  
28  
29  
30  
31  
32  
33  
34  
35  
36  
37  
38  
39  
40  
41  
42  
43  
44  
45  
46  
47  
48  
49

## 50 **6. Abbreviations**

51 **ACEIs:** Angiotensin-Converting Enzyme Inhibitors

52 **BP:** Blood Pressure

53 **CPG:** Clinical Practice Guideline

54 **CVD:** Cardiovascular Diseases  
55  
56  
57  
58  
59  
60



1  
2  
3 **DALY:** Disability Adjusted Life Years  
4 **DBP:** Diastolic Blood Pressure  
5 **EDHS:** Ethiopia Demographic Health Survey  
6 **HDL:** High-Density Lipoprotein  
7 **ICER:** Incremental Cost-Effectiveness Analysis  
8 **LDL:** Low-Density Lipoprotein  
9 **LMICs:** Low- and Middle-income Countries  
10 **MI:** Myocardial Infarction  
11 **NCDs:** Non-Communicable Diseases  
12 **NSAIDs:** Non-steroidal Anti-inflammatory Drugs  
13 **OSA:** Obstructive Sleep Apnea  
14 **PACK:** Practical Approach to Care Kit  
15 **QALY:** Quality Adjusted Life Years  
16 **SBP:** Systolic Blood Pressure  
17 **VLDL:** Very Low-Density Lipoprotein  
18 **WHO:** World Health Organization  
19 **YLD:** Years Lived with Disability  
20 **YLL:** Years of Life Lost  
21  
22  
23  
24  
25  
26  
27  
28  
29  
30  
31  
32  
33  
34  
35  
36  
37  
38  
39  
40  
41  
42  
43  
44  
45  
46  
47

## 48 **7. References**

49  
50 1. Whelton PK CR, Aronow WS, Casey DE Jr, Collins KJ, Dennison Himmelfarb C, DePalma SM,  
51 Gidding S, Jamerson KA, Jones DW, MacLaughlin EJ, Muntner P, Ovbigele B, Smith SC Jr, Spencer CC,  
52 Stafford RS, Taler SJ, Thomas RJ, Williams KA Sr, Williamson JD, Wright JT Jr. 2017  
53 ACC/AHA/AAPA/ABC/ACPM/AGS/APhA/ASH/ASPC/NMA/PCNA guideline for the prevention,  
54 detection, evaluation, and management of high blood pressure in adults: a report of the American College of  
55 Cardiology/American Heart Association Task Force on Clinical Practice Guidelines. Hypertension (Dallas, Tex  
56 : 1979). 2018;71:e13-e115.  
57

- 1
  - 2
  - 3
  - 4
  - 5
  - 6
  - 7
  - 8
  - 9
  - 10
  - 11
  - 12
  - 13
  - 14
  - 15
  - 16
  - 17
  - 18
  - 19
  - 20
  - 21
  - 22
  - 23
  - 24
  - 25
  - 26
  - 27
  - 28
  - 29
  - 30
  - 31
  - 32
  - 33
  - 34
  - 35
  - 36
  - 37
  - 38
  - 39
  - 40
  - 41
  - 42
  - 43
  - 44
  - 45
  - 46
  - 47
  - 48
  - 49
  - 50
  - 51
  - 52
  - 53
  - 54
  - 55
  - 56
  - 57
  - 58
  - 59
  - 60
2. Institute. EPH. Ethiopia steps report on risk factors for chronic non-communicable diseases and prevalence of selected NCDs. 2016.
  3. Thomas Unger, Claudio Borghi, Fadi Charchar, Nadia A. Khan, Neil R. Poulter, Dorairaj Prabhakaran, et al. 2020 International Society of Hypertension Global Hypertension Practice Guidelines. *Hypertension*. 2020;75(00):1-25.
  4. Organization WH. WHO methods and data sources for global burden of disease estimates 2000-2016. *Global Health Estimates Technical Paper WHO/HIS/IER/GHE/20184*, WHO, Geneva. 2018.
  5. Nations U. World population prospects: the 2017 revision, key findings and advance tables. United Nations, New York. 2017.
  6. O'Donnell MJ, Xavier D, Liu L, Zhang H, Chin SL, Rao-Melacini P, et al. Risk factors for Ischemic heart disease and Intracerebral Haemorrhagic stroke in 22 countries (the UNTERSTROKE study): a case-control study. *The Lancet*. 2010;376(9735):112-23.
  7. Organization WH. A heavy burden: the productivity cost of illness in Africa. 2019.
  8. Region WSEA. Special Issue on Blood Pressure-take control. India 2013 World Health Day.
  9. WHO. Health profile: Ethiopia. *World Health Rankings*: [Internet]. 2017. Available from: <https://www.worldlifeexpectancy.com/country-health-profile/ethiopia>.
  10. Tarricone R. Cost-of-illness analysis: what room in health economics? *Health policy*. 2006;77(1):51-63.
  11. Lesyuk W, Kriza C, Kolominsky-Rabas P. Cost-of-illness studies in heart failure: a systematic review 2004–2016. *BMC Cardiovascular Disorders*. 2018;18(1):74.
  12. Menzin J, Marton JP, Menzin JA, Willke RJ, Woodward RM, Federico V. Lost productivity due to premature mortality in developed and emerging countries: an application to smoking cessation. *BMC medical research methodology*. 2012;12(1):87.
  13. Liu J, Maniadakis N, Gray A, Rayner M. The economic burden of coronary heart disease in the UK. *Heart*. 2002;88(6):597-603.
  14. Organization WH. WHO guide to identifying the economic consequences of disease and injury. 2009.
  15. Jo C. Cost-of-illness studies: concepts, scopes, and methods. *Clin Mol Hepatol*. 2014;20(4):327-37.
  16. Bridges JF, Hauber AB, Marshall D, Lloyd A, Prosser LA, Regier DA, et al. Conjoint analysis applications in health—a checklist: a report of the ISPOR Good Research Practices for Conjoint Analysis Task Force. *Value in health*. 2011;14(4):403-13.
  17. Kjær T. A review of the discrete choice experiment—with emphasis on its application in health care. 2005.
  18. Bansback N, Brazier J, Tsuchiya A, Anis A. Using a discrete choice experiment to estimate health state utility values. *Journal of Health Economics*. 2012;31(1):306-18.
  19. Desa U. World population prospects 2019: Highlights. New York (US): United Nations Department for Economic and Social Affairs. 2019.
  20. ICF C. Ethiopia Demographic and Health Survey 2016, Addis Ababa, Ethiopia, and Rockville, Maryland, USA: CSA and ICF. DF-1.6.
  21. Norheim OF, Baltussen R, Johri M, Chisholm D, Nord E, Brock D, et al. Guidance on priority setting in health care (GPS-Health): the inclusion of equity criteria not captured by cost-effectiveness analysis. *Cost Eff Resour Alloc*. 2014;12:18-.
  22. World Health Organization. It's time to walk the talk: WHO independent high-level commission on noncommunicable diseases final report. Geneva: World Health Organization; 2019. Licence: CC BY-NC-SA 3.0 IGO. 2019.
  23. Ruhil R. The Changing Wealth of Nations 2018. Building a Sustainable Future. By Glenn-Marie Lange, Quentin Wodon and Kevin Carey; Washington DC: World Bank Group. © World Bank. *IASSI-Quarterly*. 2018;37(1):135-7.
  24. Antikainen R, Jousilahti P, Tuomilehto J. Systolic blood pressure, isolated systolic hypertension and risk of coronary heart disease, strokes, cardiovascular disease and all-cause mortality in the middle-aged population. *Journal of hypertension*. 1998;16(5):577-83.
  25. Ford ES, Giles WH, Mokdad AH. The distribution of 10-year risk for coronary heart disease among US adults: findings from the National Health and Nutrition Examination Survey III. *Journal of the American College of Cardiology*. 2004;43(10):1791-6.

26. Collaborators GRF. Global, regional, and national comparative risk assessment of 84 behavioural, environmental and occupational, and metabolic risks or clusters of risks for 195 countries and territories, 1990–2017: a systematic analysis for the Global Burden of Disease Study 2017. *Lancet* (London, England). 2018;392(10159):1923.
27. Flint AC, Conell C, Ren X, Banki NM, Chan SL, Rao VA, et al. Effect of systolic and diastolic blood pressure on cardiovascular outcomes. *New England Journal of Medicine*. 2019;381(3):243-51.
28. Nations U. World population prospects 2019. 2019.
29. Massimo Volpe CS. Natural History of Treated and Untreated Hypertension. In: Berbari A., Mancina G. (eds) Disorders of Blood Pressure Regulation. Updates in Hypertension and Cardiovascular Protection. Springer, Cham: Springer, Cham; 2018.
30. Xie X, Atkins E, Lv J, Bennett A, Neal B, Ninomiya T, et al. Effects of intensive blood pressure lowering on cardiovascular and renal outcomes: updated systematic review and meta-analysis. *The Lancet*. 2016;387(10017):435-43.
31. Walsh KB, Woo D, Sekar P, Osborne J, Moomaw CJ, Langefeld CD, et al. Untreated hypertension: a powerful risk factor for lobar and nonlobar intracerebral hemorrhage in whites, blacks, and Hispanics. *Circulation*. 2016;134(19):1444-52.
32. Group SR. A randomized trial of intensive versus standard blood-pressure control. *New England Journal of Medicine*. 2015;373(22):2103-16.
33. Beyhaghi H, Viera A. Comparative Cost-Effectiveness of Clinic, Home, or Ambulatory Blood Pressure Measurement for Hypertension Diagnosis in US Adults: A Modeling Study. *Hypertension*. 2019;73(1):121-31.
34. Turin TC, Okamura T, Afzal AR, Rumana N, Watanabe M, Higashiyama A, et al. Hypertension and lifetime risk of stroke. *Journal of hypertension*. 2016;34(1):116-22.
35. Law M, Morris J, Wald N. Use of blood pressure lowering drugs in the prevention of cardiovascular disease: meta-analysis of 147 randomised trials in the context of expectations from prospective epidemiological studies. *Bmj*. 2009;338:b1665.
36. Kaptoge S, Pennells L, De Bacquer D, Cooney MT, Kavousi M, Stevens G, et al. World Health Organization cardiovascular disease risk charts: revised models to estimate risk in 21 global regions. *The Lancet Global Health*. 2019;7(10):e1332-e45.
37. Dawber TR. *The Framingham Study: the epidemiology of atherosclerotic disease*. Cambridge, MA: Harvard University Press; 1980.
38. Feinleib M, Kannel WB, Garrison RJ, McNamara PM, Castelli WP. The Framingham Offspring Study. Design and preliminary data. *Prev Med*. 1975;4(4):518-25.
39. Parish S, Collins R, Peto R, Youngman L, Barton J, Jayne K, et al. Cigarette smoking, tar yields, and non-fatal myocardial infarction: 14,000 cases and 32,000 controls in the United Kingdom. The International Studies of Infarct Survival (ISIS) Collaborators. *BMJ* (Clinical research ed). 1995;311(7003):471-7.
40. Law MR, Morris JK, Wald NJ. Environmental tobacco smoke exposure and ischaemic heart disease: an evaluation of the evidence. *BMJ* (Clinical research ed). 1997;315(7114):973-80.
41. Medical Expenditure Panel Survey. Medical Expenditure Panel Survey Public Use Files 1996-2001 [Available from: <http://www.meps.ahrq.gov/Puf/PufSearch.asp?SearchOption=Keyword>]
42. Huffman MD, Mohanan PP, Devarajan R, Baldrige AS, Kondal D, Zhao L, et al. Effect of a Quality Improvement Intervention on Clinical Outcomes in Patients in India With Acute Myocardial Infarction: The ACS QUIK Randomized Clinical Trial. *Jama*. 2018;319(6):567-78.
43. Witt BJ, Brown RD, Jr., Jacobsen SJ, Weston SA, Yawn BP, Roger VL. A community-based study of stroke incidence after myocardial infarction. *Annals of internal medicine*. 2005;143(11):785-92.
44. Yasui D, Asayama K, Ohkubo T, Kikuya M, Kanno A, Hara A, et al. Stroke Risk in Treated Hypertension Based on Home Blood Pressure: the Ohasama Study. *American Journal of Hypertension*. 2010;23(5):508-14.
45. Amarenco P, Bogousslavsky J, Callahan A, 3rd, Goldstein LB, Hennerici M, Rudolph AE, et al. High-dose atorvastatin after stroke or transient ischemic attack. *The New England journal of medicine*. 2006;355(6):549-59.
46. Appelros P, Gunnarsson KE, Terent A. Ten-year risk for myocardial infarction in patients with first-ever stroke: a community-based study. *Acta neurologica Scandinavica*. 2011;124(6):383-9.

47. Behar S, Tanne D, Abinader E, Agmon J, Barzilai J, Friedman Y, et al. Cerebrovascular accident complicating acute myocardial infarction: incidence, clinical significance and short- and long-term mortality rates. *The SPRINT Study Group. The American journal of medicine.* 1991;91(1):45-50.
48. Lakshminarayan K, Schissel C, Anderson DC, Vazquez G, Jacobs DR, Jr., Ezzeddine M, et al. Five-year rehospitalization outcomes in a cohort of patients with acute ischemic stroke: Medicare linkage study. *Stroke; a journal of cerebral circulation.* 2011;42(6):1556-62.
49. Prosser J, MacGregor L, Lees KR, Diener HC, Hacke W, Davis S. Predictors of early cardiac morbidity and mortality after ischemic stroke. *Stroke; a journal of cerebral circulation.* 2007;38(8):2295-302.
50. Touze E, Varenne O, Chatellier G, Peyrard S, Rothwell PM, Mas JL. Risk of myocardial infarction and vascular death after transient ischemic attack and ischemic stroke: a systematic review and meta-analysis. *Stroke; a journal of cerebral circulation.* 2005;36(12):2748-55.
51. Health MSf. *International Medical Products Price Guide: 2015 edition.* 2015.
52. Lee SE, Lee HY, Cho HJ, Choe WS, Kim H, Choi JO, et al. Clinical Characteristics and Outcome of Acute Heart Failure in Korea: Results from the Korean Acute Heart Failure Registry (KorAHF). *Korean circulation journal.* 2017;47(3):341-53.
53. Choi DJ, Han S, Jeon ES, Cho MC, Kim JJ, Yoo BS, et al. Characteristics, outcomes and predictors of long-term mortality for patients hospitalized for acute heart failure: a report from the Korean heart failure registry. *Korean circulation journal.* 2011;41(7):363-71.
54. Global, regional, and national age-sex-specific mortality for 282 causes of death in 195 countries and territories, 1980-2017: a systematic analysis for the Global Burden of Disease Study 2017. *Lancet (London, England).* 2018;392(10159):1736-88.
55. Stenberg K, Lauer JA, Gkountouras G, Fitzpatrick C, Stanciole A. Econometric estimation of WHO-CHOICE country-specific costs for inpatient and outpatient health service delivery. *Cost Effectiveness and Resource Allocation.* 2018;16(1):11.
56. Health FMo. *National strategic action plan (NSAP) for prevention & control of non-communicable diseases in Ethiopia, 2014-2016.* 2014:43-7.
57. Mieraf Taddesse Tolla OFN, Solomon Tessema Memirie, Senbeta Guteta Abdisa, Awel Ababulgu, Degu Jerene, Melanie Bertram, Kirsten Strand, Stéphane Verguet and Kjell Arne Johansson. Prevention and treatment of cardiovascular disease in Ethiopia: cost-effectiveness analysis. *Cost Eff Resour Alloc* 2016;14(10).
58. Tan-Torres Edejer T, Acharya A, Adam Ta, Baltussen R, Evans DB, Hutubessy R, et al. Making choices in health: WHO guide to cost-effectiveness analysis. 2003.
59. Iftikhar A. *Ethiopia Decent Work Check.* Amsterdam: WageIndicator Foundation; 2019. p. 49.
60. Wang G, Zhang Z, Ayala C. Hospitalization Costs Associated With Hypertension as a Secondary Diagnosis Among Insured Patients Aged 18–64 Years. *American Journal of Hypertension.* 2010;23(3):275-81.
61. Kuriakose A, Nair Anish TS, Soman B, Varghese RT, Sreelal TP, Mendez AM, et al. Rate and Risk of All Cause Mortality among People with Known Hypertension in a Rural Community of Southern Kerala, India: The Results from the Prolife Cohort. *Int J Prev Med.* 2014;5(5):596-603.
62. Atlas. WD. *Ethiopia - Crude death rate.* 2020.
63. Kelemu Tilahun Kibret, Mesfin YM. Prevalence of hypertension in Ethiopia: a systematic meta-analysis. *Public Health Reviews* 2015;36(14).
64. WHO. *Non-communicable diseases country profiles 2018.* Geneva: World Health Organization. 2018.
65. Helelo TP GY, Adane AA. Prevalence and Associated Factors of Hypertension among Adults in Durame Town, Southern Ethiopia. *PLoS ONE.* 2014;9(11):e112790.
66. Shukuri A, Tewelde T, Shaweno T. Prevalence of old age hypertension and associated factors among older adults in rural Ethiopia. *Integrated blood pressure control.* 2019;12:23-31.
67. Zhou D, Xi B, Zhao M, Wang L, Veeranki SP. Uncontrolled hypertension increases risk of all-cause and cardiovascular disease mortality in US adults: the NHANES III Linked Mortality Study. *Sci Rep.* 2018;8(1):9418.
68. Najafi F, Karami-Matin B, Rezaei S, Khosravi A, Soofi M. Productivity costs and years of potential life lost associated with five leading causes of death: Evidence from Iran (2006-2010). *Med J Islam Repub Iran.* 2016;30:412-.



69. Noh J, Kim HC, Shin A, Yeom H, Jang S-Y, Lee JH, et al. Prevalence of Comorbidity among People with Hypertension: The Korea National Health and Nutrition Examination Survey 2007-2013. *Korean Circ J*. 2016;46(5):672-80.
70. Suchard MA, Schuemie MJ, Krumholz HM, You SC, Chen R, Pratt N, et al. Comprehensive comparative effectiveness and safety of first-line antihypertensive drug classes: a systematic, multinational, large-scale analysis. *Lancet*. 2019;394(10211):1816-26.
71. Law M, Wald N, Morris J, Jordan R. Value of low dose combination treatment with blood pressure lowering drugs: analysis of 354 randomised trials. *Bmj*. 2003;326(7404):1427.
72. Law MR, Morris JK, Wald NJ. Use of blood pressure lowering drugs in the prevention of cardiovascular disease: meta-analysis of 147 randomised trials in the context of expectations from prospective epidemiological studies. *BMJ (Clinical research ed)*. 2009;338:b1665.
73. Sorato MM, Davari M, Kebriaeezadeh A, Sarrafzadegan N, Shibru T, Fatemi B. Risk of fatal and nonfatal coronary heart disease and stroke events among adult patients with hypertension: basic Markov model inputs for evaluating cost-effectiveness of hypertension treatment: systematic review of cohort studies. *Journal of Pharmaceutical Health Services Research*. 2021;12(2).
74. Offei S. Economic Burden of Hypertension among Patients Attending Nsawam-Government Hospital in the Nsawam-Adoagyiri Municipality, Eastern Region, Ghana: University of Ghana; 2018.
75. Weaver CG, Clement FM, Campbell NRC, James MT, Klarenbach SW, Hemmelgarn BR, et al. Healthcare Costs Attributable to Hypertension. *Hypertension*. 2015;66(3):502-8.
76. Kirkland EB, Heincelman M, Bishu KG, Schumann SO, Schreiner A, Axon RN, et al. Trends in healthcare expenditures among US adults with hypertension: national estimates, 2003–2014. *Journal of the American Heart Association*. 2018;7(11):e008731.
77. Cohen JD. Hypertension epidemiology and economic burden: refining risk assessment to lower costs. *Managed care (Langhorne, Pa)*. 2009;18(10):51-8.
78. Team CR. Ethiopia's 2019-20 Budget. Macro research Ethiopia. July 2019. 2019.
79. Pogosova N. Costs associated with cardiovascular disease create a significant burden for society and they seem to be globally underestimated. *European Journal of Preventive Cardiology*. 2020;26(11):1147-9.
80. Le C, Zhankun S, Jun D, Keying Z. The economic burden of hypertension in rural south-west China. *Tropical Medicine & International Health*. 2012;17(12):1544-51.
81. Sorato MM, Davari M, Kebriaeezadeh A, Sarrafzadegan N, Shibru T, Fatemi B. Reasons for poor blood pressure control in Eastern Sub-Saharan Africa: looking into 4P's (primary care, professional, patient, and public health policy) for improving blood pressure control: a scoping review. *BMC Cardiovascular Disorders*. 2021;21(1):123.
82. Guwatudde D, Nankya-Mutyoba J, Kalyesubula R, Laurence C, Adebamowo C, Ajayi I, et al. The burden of hypertension in sub-Saharan Africa: a four-country cross sectional study. *BMC Public Health*. 2015;15:1211.
83. Kuate Defo B, Mbanya JC, Kingue S, Tardif J-C, Choukem SP, Perreault S, et al. Blood pressure and burden of hypertension in Cameroon, a microcosm of Africa: a systematic review and meta-analysis of population-based studies. *Journal of Hypertension*. 2019;37(11).
84. Constant AF, Geladari EV, Geladari CV. "The Economic Burden of Hypertension". In: Andreadis EA, editor. *Hypertension and Cardiovascular Disease*. Cham: Springer International Publishing; 2016. p. 351-9.
85. Yoruk A, Boulous PK, Bisognano JD. The State of Hypertension in Sub-Saharan Africa: Review and Commentary. *American Journal of Hypertension*. 2017;31(4):387-8.
86. Gaziano TA, Bitton A, Anand S, Weinstein MC. The global cost of nonoptimal blood pressure. *Journal of hypertension*. 2009;27(7):1472-7.
87. Hird TR, Zomer E, Owen AJ, Magliano DJ, Liew D, Ademi Z. Productivity Burden of Hypertension in Australia: A Life Table Modeling Study. *Hypertension*. 2019;73(4):777-84.
88. Flack JM, Casciano R, Casciano J, Doyle J, Arikian S, Tang S, et al. Cardiovascular disease costs associated with uncontrolled hypertension. *Managed care interface*. 2002;15(11):28-36.

1  
2  
3 89. Gordois AL, Toth PP, Quek RG, Proudfoot EM, Paoli CJ, Gandra SR. Productivity losses associated  
4 with cardiovascular disease: a systematic review. Expert review of pharmacoeconomics & outcomes research.  
5 2016;16(6):759-69.  
6  
7  
8  
9  
10  
11  
12  
13  
14  
15  
16  
17  
18  
19  
20  
21  
22  
23  
24  
25  
26  
27  
28  
29  
30  
31  
32  
33  
34  
35  
36  
37  
38  
39  
40  
41  
42  
43  
44  
45  
46  
47  
48

## 49 **Ethics and Declarations**

### 50 **Ethics approval and consent to participate**

51  
52  
53 The study was approved by Tehran University of medical sciences, Faculty of pharmacy, department of  
54 pharmacoeconomics, and pharmaceutical administration ethical review board with Approval ID:  
55  
56  
57

1  
2  
3 *IR.TUMS.MEDICINE.REC.1399.674* and Arba Minch University College of medicine and health sciences  
4 Institutional review board with Reference number: *IRB/T10/2012*. After clarifying the study objective and  
5 confidentiality of the information; verbal informed consent was obtained from each respective hospital before  
6 data collection.  
7  
8

### 9 10 **Consent for publication**

11  
12 All authors read the full version of this manuscript and agreed to publish  
13

### 14 15 **Availability of data and materials**

16  
17 All the data reported in the manuscript are publicly available up on official request of principal investigator  
18 upon acceptance of the manuscript  
19

### 20 21 **Competing interests**

22  
23 The authors declare that they have no competing interests.  
24

### 25 26 **Funding**

27  
28 There is no funding source for the study.  
29

### 30 31 **Authors' contributions**

32 All Authors read and approved the manuscript. *MM* conceived the research, framed the format design and  
33 developed the manuscript for publication; *MD* participated in data analysis and reviewed the manuscript and *AK*  
34 reviewed the manuscript and write-up process; *NS* and *TS*, participated in literature review and polished the  
35 language of the manuscript.  
36  
37  
38

### 39 40 **Acknowledgements**

41  
42 We would like to thank all patients participated in this study for their valuable dedication to provide  
43 information, We would also like to thank Arba Minch University college of medicine and health sciences and  
44 Tehran University medical sciences, department of pharmacoeconomics and Pharmaceutical Administration  
45 staffs for their technical and material support during this manuscript development.  
46  
47  
48  
49

### 50 51 **Legends**

### 52 53 54 **List of Figures**

1  
2  
3 **Figure 1:** Micro-costing Bottom-up Approach for Healthcare costs. Adapted from Riewpaiboon A, et al. Cost  
4 analysis for efficient management: diabetes treatment at a public district hospital in Thailand.  
5  
6

7 **Figure 2:** Number of premature deaths and years of life lost (YLL) due to morbidity among adults with  
8 hypertension by sex, treatment and control status over productive life years simulated from life table modelling  
9 in Southern Ethiopia  
10  
11

## 12 **List of Tables**

13  
14  
15 **Table 1:** Patient characteristics and Disease related factors among adult hypertensive patients on regular follow  
16 up at selected public hospitals in Southern Ethiopia (n=406)  
17

18 **Table 2:** Direct annual costs of treating hypertension among adults in Southern Ethiopia, January 2021  
19 (n=406)  
20

21 **Table 3:** Excess deaths among adult hypertensive by treatment and control status over the working lifetime  
22 simulated from life table modelling in Southern Ethiopia (n=406)  
23

24 **Table 4:** Years of life lost (YLL) by adults with hypertension by treatment and control status over the lifetime  
25 simulated from life table modelling in Southern Ethiopia (n=406)  
26

27 **Table 5:** Productivity loss associated premature mortality and hypertension morbidity, Southern Ethiopia,  
28 January, 2021 (n=406)  
29  
30  
31  
32  
33  
34  
35  
36  
37  
38  
39  
40  
41  
42  
43  
44  
45  
46  
47  
48  
49  
50  
51  
52  
53  
54  
55  
56  
57  
58  
59  
60



1  
2  
3  
4  
5  
6  
7  
8  
9  
10  
11  
12  
13  
14  
15  
16  
17  
18  
19  
20  
21  
22  
23  
24  
25  
26  
27  
28  
29  
30  
31  
32  
33  
34  
35  
36  
37  
38  
39  
40  
41  
42  
43  
44  
45  
46  
47  
48  
49  
50  
51  
52  
53  
54  
55  
56  
57  
58  
59  
60

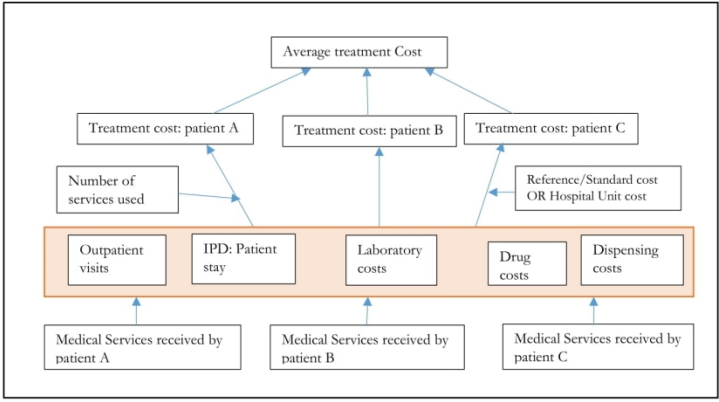

599x776mm (72 x 72 DPI)

1  
2  
3  
4  
5  
6  
7  
8  
9  
10  
11  
12  
13  
14  
15  
16  
17  
18  
19  
20  
21  
22  
23  
24  
25  
26  
27  
28  
29  
30  
31  
32  
33  
34  
35  
36  
37  
38  
39  
40  
41  
42  
43  
44  
45  
46  
47  
48  
49  
50  
51  
52  
53  
54  
55  
56  
57  
58  
59  
60

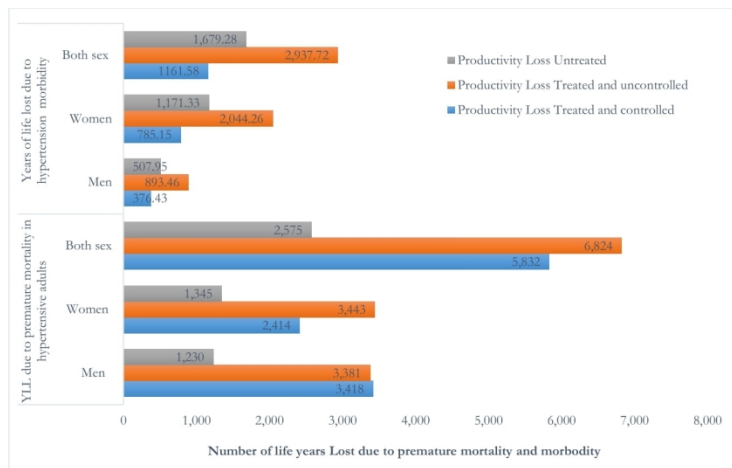

599x776mm (72 x 72 DPI)

**Supplementary materials:** Economic burden of hypertension at selected Hospitals in Southern Ethiopia; a patient level analysis

### Cardiovascular disease policy model

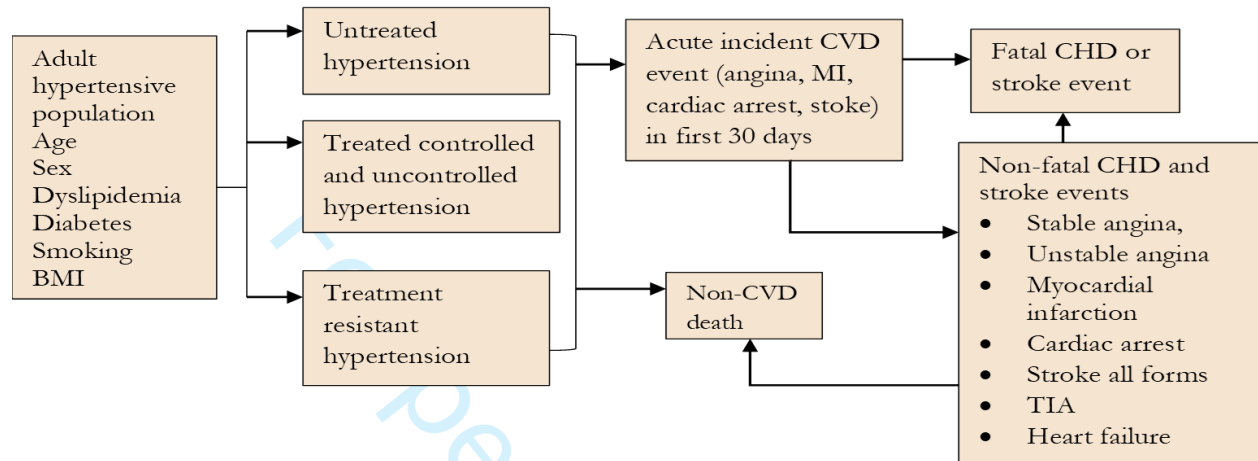

**Supplementary Figure 1:** Cardiovascular disease policy model adapted for Sub-Saharan African perspective (1).

**Supplementary Table 1:** Age and sex specific distribution of Ethiopian population 2020 estimate, prevalence of hypertension and adult mortality rate

| Age structure                     | Male       | Female     | Total       | Estimated prevalence of hypertension | Mortality rate |         | Data Source |
|-----------------------------------|------------|------------|-------------|--------------------------------------|----------------|---------|-------------|
| <b>Prevalence of hypertension</b> |            |            |             |                                      | Men            | Women   | (2-8)       |
| 0-14 years                        | 21,657,152 | 21,381,628 | 43,038,780  | NA                                   | -              | -       |             |
| 15-19                             | 5,572,330  | 5,464,174  | 11,036,504  | 19.6                                 | 0.00286        | 0.00222 |             |
| 20-24                             | 5,930,683  | 5,816,173  | 11,746,856  | 19.6                                 | 0.00319        | 0.00223 |             |
| 25-29                             | 4,889,739  | 4,802,450  | 9,692,189   | 19.6                                 | 0.00293        | 0.00232 |             |
| 30-34                             | 3,761,349  | 3,757,544  | 7,518,893   | 23.0                                 | 0.00397        | 0.00368 |             |
| 35-39                             | 3,091,148  | 3,182,837  | 6,273,985   | 23.0                                 | 0.00411        | 0.00222 |             |
| 40-44                             | 2,445,523  | 2,488,422  | 4,933,945   | 25.9                                 | 0.00584        | 0.00385 |             |
| 45-49                             | 2,071,480  | 2,033,228  | 4,104,708   | 25.9                                 | 0.00360        | 0.00457 |             |
| 50-54                             | 1,567,789  | 1,660,957  | 3,228,746   | 41.9                                 | 0.00354        | 0.00274 |             |
| 55-59                             | 1,159,002  | 1,316,318  | 2,475,320   | 41.9                                 | 0.00354        | 0.00274 |             |
| 60-64                             | 946,594    | 1,109,670  | 2,056,264   | 41.9                                 | 0.00354        | 0.00274 |             |
| ≥ 65 years                        | 1,676,478  | 1,977,857  | 3,654,335   | 41.9                                 | 0.00354        | 0.00274 |             |
| Total                             | 54,769,267 | 54,991,258 | 109,760,525 |                                      |                |         |             |
|                                   |            |            |             | Prevalence of untreated hypertension |                |         |             |
| For all ages (15 +)               |            |            |             | 13.25                                |                |         | (9)         |

**Supplementary Table 2.** Model Parameters, Cohort Setting, and Probability of Transition between states and Disability weights for hypertension and related complications the Global Burden of Disease 2013 study and WHO Global Health Estimates

| Parameter                                                          | Data                                             | Source         |
|--------------------------------------------------------------------|--------------------------------------------------|----------------|
| Relative risk of hypertension treatment                            |                                                  |                |
| Relative risk of CHD event on hypertension treatment               | 0.683 (95% CI, 0.633–0.717)                      | (10-13)        |
| Relative risk of a cerebrovascular event on hypertension treatment | 0.633 (95% CI, 0.526–0.717)                      | (14)           |
| Relative risk of CHD event on normotensive men and women           | 0.49 (95% CI 0.458–0.513) and 0.32 (0.292–0.342) | (15)           |
| <b>Transition probabilities to death</b>                           |                                                  |                |
| <b>Health state</b>                                                | <b>Disability weight Estimate</b>                | <b>Source</b>  |
| <b>Hypertension</b>                                                |                                                  | <b>(16)</b>    |
| Treated                                                            | 0.246                                            |                |
| Untreated                                                          | 0.323                                            |                |
| Treated and controlled                                             | 0.171                                            |                |
| <b>Myocardial Infarction (MI)</b>                                  |                                                  | <b>(17)</b>    |
| Day 1-2                                                            | 0.432                                            |                |
| Days 3-28                                                          | 0.074                                            |                |
| <b>Angina Pectoris</b>                                             |                                                  |                |
| Mild                                                               | 0.033                                            |                |
| Moderate                                                           | 0.080                                            |                |
| Severe                                                             | 0.167                                            |                |
| <b>Heart failure</b>                                               |                                                  |                |
| Mild                                                               | 0.041                                            |                |
| Moderate                                                           | 0.072                                            |                |
| <b>Diabetes, digestive, and genitourinary disease</b>              |                                                  |                |
| <b>Diabetes</b>                                                    | 0.015 (0.012 - 0.018)                            | <b>(18-20)</b> |
| <b>Treated</b>                                                     | 0.033                                            |                |
| <b>Untreated</b>                                                   | 0.012                                            |                |

|                                                 |                     |
|-------------------------------------------------|---------------------|
| Diabetic neuropathy                             | 0.133               |
| Chronic kidney disease (stage IV)               | 0.104               |
| End-stage renal disease: with kidney transplant | 0.024               |
| End-stage renal disease: on dialysis            | 0.571               |
| Disutility due to daily medication              | 0.049 (0.031–0.072) |
| <b>Acute Events</b>                             |                     |
| Myocardial Infarction                           | 0.432 (0.288–0.579) |
| Stroke                                          | 0.570 (0.377–0.707) |
| Occurrence of second or later CVD event         | 0.985 (0.992–0.989) |
| <b>Chronic States</b>                           |                     |
| Ischemic Heart Disease                          | 0.08 (0.02–0.24)    |
| Stroke                                          | 0.135 (0.01–0.437)  |
| Alive post 2+ CVD Events                        | 0.242 (0.11–0.437)  |

CHD, coronary heart disease; SMR, standardized mortality ratio. \*Age and sex dependent †Applied multiplicatively to general population age- and sex-dependent utilities; CHD= Angina pectoris, coronary insufficiency, myocardial infarction, or coronary death.

**Supplementary table 3:** Simulation input parameters

| Input parameter                                              | Value                                                                                                                                                                                                             | Source                                                                                             |
|--------------------------------------------------------------|-------------------------------------------------------------------------------------------------------------------------------------------------------------------------------------------------------------------|----------------------------------------------------------------------------------------------------|
| Non-CVD death rate                                           | 0.005–0.176 (Age- and sex specific)#                                                                                                                                                                              | Calculated from WHO lifetables and GBD 2017 (21)                                                   |
| Probability of first-time cardiovascular disease (CVD) event | Individual risk characteristic specific                                                                                                                                                                           | Obtained from the Globorisk Office Calculator standardized for India [25]                          |
| <b>Acute CVD events</b>                                      |                                                                                                                                                                                                                   |                                                                                                    |
| MI                                                           |                                                                                                                                                                                                                   |                                                                                                    |
| Probability of MI if CVD event occurs                        | 37.6– 66.7% (Age- and sex specific)#                                                                                                                                                                              | Calculated based on GBD 2017(21)                                                                   |
| 30-day fatality                                              | 0.01–0.13 (Age- and sex-specific)#                                                                                                                                                                                | Calibrated based on findings of Huffman et al. 2018 (22)                                           |
| Re-infarction (in 30 days)                                   | 0.0120 (0.0099–0.0141)ψ                                                                                                                                                                                           | ACS QUIK Study by Huffman et al. 2018 (22)                                                         |
| Acute Stroke (in 30 days)                                    | 0.0060 (0.0045–0.0075)ψ                                                                                                                                                                                           | ACS QUIK Study by Huffman et al. 2018 (22)                                                         |
| Stroke                                                       |                                                                                                                                                                                                                   |                                                                                                    |
| Probability of Stroke if CVD event occurs                    | 33.2–62.3% (Age- and sex specific)#                                                                                                                                                                               | Calculated based on GBD 2017 (21) And Jushua D. Bundry et al(23)                                   |
| 30-day fatality                                              | 0.12, 0.13 (Sex-specific)#                                                                                                                                                                                        | Calibrated based on a multi-site study by Pandian and Sudhan 2013 [30]                             |
| Repeat Stroke (in 30 days)                                   | 0.15 (0.1–0.2)ψ                                                                                                                                                                                                   | Petty et al. 1998 (24)                                                                             |
| Sudden cardiac death                                         | 0.10 per 100 patient-years (95% CI, 0.07–0.14) in a cohort of 33 of 3242 untreated hypertensive patients without evidence of coronary or cerebrovascular HD at entry and followed up for an average of 10.3 years | Heart disease and stroke statistics 2021 update                                                    |
| <b>Heart failure</b>                                         |                                                                                                                                                                                                                   |                                                                                                    |
| Probability of AHF                                           |                                                                                                                                                                                                                   |                                                                                                    |
| 30-days fatality                                             | 0.0945                                                                                                                                                                                                            | Obtained from the THESUS-HF registry (25) and Korean Acute Heart Failure Registry (KorAHF)(26, 27) |

|                                                                         |                                            |                                                                                                                                                                                                                              |
|-------------------------------------------------------------------------|--------------------------------------------|------------------------------------------------------------------------------------------------------------------------------------------------------------------------------------------------------------------------------|
| Re-hospitalization                                                      | 0.0736                                     | Obtained from the THESUS-HF registry (25)                                                                                                                                                                                    |
| <b>Chronic events</b>                                                   |                                            |                                                                                                                                                                                                                              |
| Monthly risk of mortality                                               | 0.001–0.019 (Age- and sex-specific)#       | Calibrated based on GBD 2017 (21)                                                                                                                                                                                            |
| Reinfarction                                                            | 0.079 (0.073–0.085)ψ                       | Based on Steg et al. 2007 (28) and derived by Lin et al. 2019 (20)                                                                                                                                                           |
| Acute Stroke                                                            | 0.014 (0.012–0.016)ψ                       | Based on Steg et al. 2007 (28) and derived by Lin et al. 2019 (20)<br>Continue Or Stop post-Stroke Antihypertensives Collaborative Study (COSSACS) (29), BP reduction and secondary stroke prevention: systematic review(30) |
| <b>Stroke</b>                                                           |                                            |                                                                                                                                                                                                                              |
| Monthly risk of mortality                                               | 0.001–0.013 (Age- and sex specific)#       | Calibrated based on GBD 2017 (21)<br><br>Stroke Risk in Treated Hypertension Based on Home Blood Pressure: the Ohasama Study(31)                                                                                             |
| Acute MI                                                                | 0.043 (0.038–0.048)ψ                       | Based on Steg et al. 2007 (28) and derived by Lin et al. 2019 (20)                                                                                                                                                           |
| Acute Stroke                                                            | 0.037 (0.033–0.041)                        | Based on Steg et al. 2007 (28) and derived by Lin et al. 2019 (20)                                                                                                                                                           |
| Relative risk of fatality for an individual with two or more CVD events | 1.5                                        | Smolina et al. 2012 (32)                                                                                                                                                                                                     |
| <b>Heart failure</b>                                                    |                                            |                                                                                                                                                                                                                              |
| <b>Incidence</b>                                                        |                                            |                                                                                                                                                                                                                              |
| 1 year mortality                                                        |                                            |                                                                                                                                                                                                                              |
| Re-hospitalization                                                      |                                            | <b>Moita B.eta al. 2019(36) and (37)</b>                                                                                                                                                                                     |
| <b>Effect of antihypertensive medication</b>                            |                                            |                                                                                                                                                                                                                              |
| Medication protocol for an individual                                   | Initial SBP-specific#                      | Based on Ethiopian NCD control guideline                                                                                                                                                                                     |
| IHD relative risk due to medication                                     | 0.32–0.89 (Age- and initial SBP-specific)# | Based on findings by Law et al. 2009 (38) and Asayam Kei., 2017(39)                                                                                                                                                          |
| Stroke relative risk due to medication                                  | 0.20–0.89 (Age- and initial SBP-specific)# | Based on findings by Law et al. 2009(38)                                                                                                                                                                                     |
| IHD relative risk if partially adherent                                 | 0.66–0.95 (Age- and initial SBP-specific)  | Calculated based on a linear relationship between adherence and efficacy as considered by Cherry et al. 2009(40)                                                                                                             |
| Stroke relative risk if partially adherent                              | 0.60–0.95 (Age- and initial SBP-specific)  | Calculated based on a linear relationship between adherence and efficacy as considered by Cherry et al. 2009 (40) and Lisheng Liu, Zengwu Wang. et al(41)                                                                    |

**Supplementary Table 4:** Price of drugs, medical supplies, procedures and professional time used for management of hypertension in Southern Ethiopia, January, 2021

| List of medicines                                                                                        | Unit   | Price in 2021 Ethiopian birr |              | Price USD                | Source                                                                                                                                                                      |
|----------------------------------------------------------------------------------------------------------|--------|------------------------------|--------------|--------------------------|-----------------------------------------------------------------------------------------------------------------------------------------------------------------------------|
|                                                                                                          |        | Wholesale price              | Retail price | Retail Price in 2021 USD |                                                                                                                                                                             |
| Acetylsalicylic Acid - 81mg – Tablet (coated)                                                            | 10x10  | 43.72                        | 1.32         | 1.303                    | Ethiopian<br>Pharmaceutica<br>l supply<br>agency, Arba<br>Minch Hub<br>wholesale<br>price 2021 and<br>Arba Minch<br>General<br>hospital<br>pharmacy<br>retail price<br>2021 |
| Adrenaline (Epinephrine)-0.1% in 1mL ampoule                                                             | Each   | 36.032                       | 1.09         | 1.074                    |                                                                                                                                                                             |
| Amiodarone - 100mg – Tablet                                                                              | 10x3   | 313.34                       | 9.44         | 9.337                    |                                                                                                                                                                             |
| Amlodipine - 10mg - Tablet                                                                               | 10x10  | 105.44                       | 3.18         | 3.142                    |                                                                                                                                                                             |
| Amlodipine - 5mg – Tablet                                                                                | 10x10  | 75.26                        | 2.27         | 2.243                    |                                                                                                                                                                             |
| Atenolol - 50mg – Tablet                                                                                 | 10x10  | 58.70                        | 1.77         | 1.749                    |                                                                                                                                                                             |
| Atorvastatin - 20mg – Tablet                                                                             | 10x10  | 195.68                       | 5.89         | 5.831                    |                                                                                                                                                                             |
| Atorvastatin - 40mg – Tablet                                                                             | 10x3   | 140.76                       | 4.24         | 4.195                    |                                                                                                                                                                             |
| Beclomethasone Propionate -100mcg/dose – Aerosol                                                         | 200 MD | 131.85                       | 3.97         | 3.929                    |                                                                                                                                                                             |
| Candesartan - 8mg – Tablet                                                                               | 14x2   | 152.63                       | 4.60         | 4.548                    |                                                                                                                                                                             |
| Captopril - 12.5mg – Tablet                                                                              | 10x10  | 33.54                        | 1.01         | 1.000                    |                                                                                                                                                                             |
| Captopril - 25mg – Tablet                                                                                | 10x10  | 26.91                        | 0.81         | 0.802                    |                                                                                                                                                                             |
| Dexamethasone - 4mg/ml in 1ml Ampoule - Injection                                                        | 10     | 3.95                         | 0.12         | 0.118                    |                                                                                                                                                                             |
| Captopril + HCT (50mg + 25mg)-Tablet                                                                     | 10x10  | 57.32                        | 1.73         | 1.708                    |                                                                                                                                                                             |
| Digoxin - 0.25mg – Tablet                                                                                | 10x10  | 202.18                       | 6.09         | 6.025                    |                                                                                                                                                                             |
| Enalapril Maleate - 10mg - Tablet                                                                        | 10x10  | 61.57                        | 1.85         | 1.835                    |                                                                                                                                                                             |
| Enalapril Maleate - 5mg – Tablet                                                                         | 10x10  | 63.92                        | 1.93         | 1.905                    |                                                                                                                                                                             |
| Enalapril Maleate – 2.5mg – Tablet                                                                       | 10x10  | 19.98                        | 0.60         | 0.595                    |                                                                                                                                                                             |
| Enalapril Maleate +HCT (10 mg + 25 mg)-tablet                                                            | 10x10  | 78.22                        | 2.36         | 2.331                    |                                                                                                                                                                             |
| Glibenclamide - 5mg – Tablet                                                                             | 10x10  | 39.09                        | 1.18         | 1.165                    |                                                                                                                                                                             |
| Glucose 40% in 20 mL – IV infusion                                                                       | Each   | 2.54                         | 0.08         | 0.076                    |                                                                                                                                                                             |
| Glyceryl Trinitrate - 0.4mg – Tablet (Sublingual)                                                        | 100    | 487.21                       | 14.67        | 14.518                   |                                                                                                                                                                             |
| Hydralazine - 20mg/ml in 1ml ampoule - Injection                                                         | 5      | 204.01                       | 6.14         | 6.079                    |                                                                                                                                                                             |
| Hydrochlorothiazide - 25mg – Tablet                                                                      | 25x4   | 48.05                        | 1.45         | 1.432                    |                                                                                                                                                                             |
| Insulin Isophane Biphasic (Soluble/Isophane Mixture)- (30 + 70)IU/ml in 10ml Vial -Injection(Suspension) | Each   | 85.20                        | 2.57         | 2.539                    |                                                                                                                                                                             |
| Insulin Isophane Human - 100IU/ml in 10ml Vial - Injection(Suspension)                                   | Each   | 100.28                       | 3.02         | 2.988                    |                                                                                                                                                                             |
| Insulin Soluble Human - 100IU/ml in 10ml Vial                                                            | Each   | 106.21                       | 3.20         | 3.165                    |                                                                                                                                                                             |
| Lovastatin - 20mg – Tablet                                                                               | 10x10  | 84.59                        | 2.55         | 2.521                    |                                                                                                                                                                             |
| Metformin - 500mg – Tablet                                                                               | 10     | 27.78                        | 0.84         | 0.828                    |                                                                                                                                                                             |
| Methyldopa - 250mg – Tablet                                                                              | 100x10 | 51.75                        | 1.56         | 1.542                    |                                                                                                                                                                             |
| Metoprolol - 50mg – Tablet                                                                               | 10x10  | 94.43                        | 2.84         | 2.814                    |                                                                                                                                                                             |
| Morphine sulphate-30mg-tablet                                                                            | 110    | 410.71                       | 12.37        | 12.239                   |                                                                                                                                                                             |
| Nifedipine - 20mg – Tablet                                                                               | 10x10  | 58.70                        | 1.77         | 1.749                    |                                                                                                                                                                             |
| Prednisolone - 5 mg – Tablet                                                                             | 100x10 | 342.23                       | 10.31        | 10.198                   |                                                                                                                                                                             |
| Propranolol - 40mg – Tablet                                                                              | 10x10  | 67.54                        | 2.03         | 2.013                    |                                                                                                                                                                             |
| Propylthiouracil - 100mg - Tablet (Scored)                                                               | 100    | 633.87                       | 19.09        | 18.889                   |                                                                                                                                                                             |
| Salbutamol - 0.1mg/dose - Aerosol (Oral Inhalation)                                                      | 200 MD | 117.20                       | 3.53         | 3.492                    |                                                                                                                                                                             |
| Spironolactone - 25mg – Tablet                                                                           | 10x10  | 81.87                        | 2.47         | 2.440                    |                                                                                                                                                                             |
| Thyroxin Sodium - 0.1mg – Tablet                                                                         | 100    | 178.49                       | 5.38         | 5.319                    |                                                                                                                                                                             |
| Valsartan + HCT (80mg +12.5mg)                                                                           | 7*2    | 38.47                        | 1.16         | 1.146                    |                                                                                                                                                                             |
| <b>Laboratory and imaging costs</b>                                                                      |        | <b>Price per test ETB</b>    |              | Price in 2021 USD        |                                                                                                                                                                             |
| CBC                                                                                                      |        | 75.00                        |              | 1.72                     | Arba Minch<br>General<br>Hospital<br>Laboratory<br>service price<br>2021                                                                                                    |
| FBG/RBS                                                                                                  |        | 20.00                        |              | 0.46                     |                                                                                                                                                                             |
| Lipid profile (LDL, HDL, Total cholesterol, Triglyceride)                                                |        | 160.00                       |              | 3.68                     |                                                                                                                                                                             |
| ECG                                                                                                      |        | 120.00                       |              | 2.76                     |                                                                                                                                                                             |
| ECO                                                                                                      |        | 350.00                       |              | 8.05                     |                                                                                                                                                                             |
| CT-scan                                                                                                  |        | 1200                         |              | 27.59                    |                                                                                                                                                                             |
| RFT (bilirubin, creatinine)                                                                              |        | 80.00                        |              | 1.84                     |                                                                                                                                                                             |
| Chest-ray                                                                                                |        | 726                          |              | 16.69                    |                                                                                                                                                                             |
| Urine analysis                                                                                           |        | 15.00                        |              | 0.34                     |                                                                                                                                                                             |
| Body fluid analysis                                                                                      |        | 100.00                       |              | 2.30                     |                                                                                                                                                                             |
| H. pylori                                                                                                |        | 50.00                        |              | 1.15                     |                                                                                                                                                                             |

|                                                                                     |                                                                 |                                                                                                                                             |                                  |
|-------------------------------------------------------------------------------------|-----------------------------------------------------------------|---------------------------------------------------------------------------------------------------------------------------------------------|----------------------------------|
| Liver function test (AST, ALT, ALP)                                                 | 120.00                                                          | 2.76                                                                                                                                        |                                  |
| Thyroid function test (T3, T4, TSH)                                                 | 432.00                                                          | 9.93                                                                                                                                        |                                  |
| <b>Hospital bed days</b>                                                            |                                                                 |                                                                                                                                             |                                  |
| Primary hospital                                                                    | 52.52                                                           | 1.21                                                                                                                                        | WHO Choice (42) inflated to 2021 |
| Secondary hospital                                                                  | 54.76                                                           | 1.26                                                                                                                                        |                                  |
| Tertiary hospital                                                                   | 70.81                                                           | 1.63                                                                                                                                        |                                  |
| <b>Health facility visit</b>                                                        |                                                                 | 0.00                                                                                                                                        |                                  |
| Primary hospital                                                                    | 18.58                                                           | 0.43                                                                                                                                        |                                  |
| Secondary hospital                                                                  | 21.17                                                           | 0.49                                                                                                                                        |                                  |
| Tertiary hospital                                                                   | 22.06                                                           | 0.51                                                                                                                                        |                                  |
| Health center visit                                                                 | 23.00                                                           | 0.53                                                                                                                                        |                                  |
| PCI intervention                                                                    | 63,000.00                                                       | 1448.28                                                                                                                                     |                                  |
| In-patient costs for MI                                                             | 45240.00                                                        | 1040.00                                                                                                                                     |                                  |
| In-patient costs for Stroke                                                         | 40890.00                                                        | 940.00                                                                                                                                      |                                  |
| Outpatient cost for IHD (per annum)                                                 | 1957.50                                                         | 45.00                                                                                                                                       |                                  |
| Outpatient cost for Stroke (per annum)                                              | 2914.50                                                         | 67.00                                                                                                                                       |                                  |
| <b>Salary scale of human resource</b>                                               |                                                                 | 0.00                                                                                                                                        |                                  |
| Physician                                                                           | 21,100.00                                                       | 485.06                                                                                                                                      | MOH, Ethiopia 2012/2019 (43).    |
| Acute care nurse                                                                    | 7470.00                                                         | 171.72                                                                                                                                      |                                  |
| Pharmacy personnel                                                                  | 8047.00                                                         | 184.99                                                                                                                                      |                                  |
| Laboratory technician                                                               | 6460.00                                                         | 148.51                                                                                                                                      |                                  |
| Program cost per person per annum                                                   | 993.29                                                          | 22.83                                                                                                                                       |                                  |
| <b>Antihypertensive treatment</b>                                                   |                                                                 |                                                                                                                                             |                                  |
| Antihypertensive medication (per individual per annum)                              | Drug costs based on national Drug supply agency wholesale price |                                                                                                                                             |                                  |
| Out-patient consultations (per visit)                                               | \$43.36                                                         | Annual outpatient visit cost (12*WHO cost per outpatient visit inflated to 2021) WHO Choice (42)                                            |                                  |
| One-time diagnostic tests                                                           |                                                                 | Based on Laboratory procedures and test price of Arba Minch General Hospital, 2021                                                          |                                  |
| In-patient costs for MI                                                             | \$1040                                                          | WHO Choice (42) inflated to 2021                                                                                                            |                                  |
| In-patient costs for Stroke                                                         | \$940                                                           |                                                                                                                                             |                                  |
| <b>Chronic CVD care</b>                                                             |                                                                 |                                                                                                                                             |                                  |
| Secondary care medication in public sector (per individual per annum)               | \$92, \$184 (Dosage-specific)§                                  | MSH-2015 International Drug Price Indicator inflated to 2021(25)                                                                            |                                  |
| Outpatient cost for IHD (per annum)                                                 | \$45                                                            | WHO Choice (44) inflated to 2021                                                                                                            |                                  |
| Outpatient cost for Stroke (per annum)                                              | \$67                                                            |                                                                                                                                             |                                  |
| Average inflation rate Ethiopia                                                     | 16.58%                                                          | <a href="https://take-profit.org/en/statistics/inflation-rate/ethiopia/">https://take-profit.org/en/statistics/inflation-rate/ethiopia/</a> |                                  |
| Average inflation rate foreign                                                      | 2.02%                                                           |                                                                                                                                             |                                  |
| Percentage change                                                                   | 24.6%                                                           |                                                                                                                                             |                                  |
| Exchange rate July 2021 (1USD)                                                      | 43.5 ETB                                                        |                                                                                                                                             |                                  |
| 1USD = 20.999 ETB in 2016 and 43.5 in 2021; PPP= 12.1/8.1 = 1.5                     |                                                                 |                                                                                                                                             |                                  |
| MD: metered Dose; MOH: Ministry of Health 1 USD = 43.5 January 2021                 |                                                                 |                                                                                                                                             |                                  |
| <b>Note:</b> 30% mark-up at regional EPSA hub, 31% mark-up at Public Hospital level |                                                                 |                                                                                                                                             |                                  |



**Supplementary Table 5:** Risk of death across age and gender covariate categories stratified for hypertension

| Variables                         | Categories           | Incidence of death (%) |                | Relative risk in each category (CI) | Source |
|-----------------------------------|----------------------|------------------------|----------------|-------------------------------------|--------|
|                                   |                      | High BP group          | Normal         |                                     |        |
| Age                               | 20-29                | 1.68%                  | 0.54%          | 3.11 (1.16-8.36)                    | (8)    |
|                                   | 30-39                | 1.71%                  | 0.94%          | 1.82 (1.04-3.19)                    |        |
|                                   | 40-49                | 2.43%                  | 1.88%          | 1.29 (0.91-1.82)                    |        |
|                                   | 50-59                | 6.30%                  | 4.03%          | 1.56 (1.28-1.91)                    |        |
|                                   | 60 and above         | 19.32%                 | 15.9%          | 1.21 (1.12-1.31)                    |        |
| Gender                            | Women                | 8.71%                  | 1.1%           | 3.31 (2.98-3.68)                    |        |
|                                   | Men                  | 15.47%                 | 4.62%          | 3.34(3.02-3.70)                     |        |
| <b>Risk of all case mortality</b> |                      |                        |                |                                     |        |
| Gender                            | Treatment status     | < 60 years             | > 60 years     | HR (95% CI)                         | (45)   |
| Men                               | Normal               | <b>0.0068</b>          | <b>0.0214</b>  | 1.00 (Reference)                    |        |
|                                   | Treated controlled   | <b>0.0188</b>          | <b>0.0305</b>  | 1.20 (0.92-1.57)                    |        |
|                                   | Treated uncontrolled | <b>0.0252</b>          | <b>0.0372</b>  | 1.55 (1.19-2.01)                    |        |
|                                   | Untreated            | <b>0.0197</b>          | <b>0.0336</b>  | 1.45 (1.23-1.72)                    |        |
| Women                             | Normal               | <b>0.00528</b>         | <b>0.01870</b> | 1.00 (Reference)                    |        |
|                                   | Treated controlled   | <b>0.01675</b>         | <b>0.02841</b> | 1.11 (0.84-1.47)                    |        |
|                                   | Treated uncontrolled | <b>0.02533</b>         | <b>0.03736</b> | 1.63 (1.34-1.99)                    |        |
|                                   | Untreated            | <b>0.02075</b>         | <b>0.03471</b> | 1.31 (1.06-1.61)                    |        |

**Supplementary Table 6:** Annual mortality rate in the total population, those with hypertension by treatment and control status and those without hypertension in Ethiopia in 2021 by age group and sex based on literature review of systematic reviews and clinical trials

| Age group    | Mortality rate in the total population | Mortality rate among people without hypertension | Mortality rate among people with treated and controlled hypertension | Mortality rate among people with treated but uncontrolled hypertension | Mortality rate among people with untreated hypertension | References                                                                      |
|--------------|----------------------------------------|--------------------------------------------------|----------------------------------------------------------------------|------------------------------------------------------------------------|---------------------------------------------------------|---------------------------------------------------------------------------------|
| <b>Women</b> |                                        |                                                  |                                                                      |                                                                        |                                                         |                                                                                 |
| 15-19        | 0.00222                                | 0.00222                                          | 0.016746                                                             | 0.025                                                                  | 0.02075                                                 | Ko, Min Jung, et al. 2016 (46), Mende Sorato, et al, 2021. (1, 23, 45, 47, 48). |
| 20-24        | 0.00223                                | 0.00223                                          | 0.016746                                                             | 0.025                                                                  | 0.02075                                                 |                                                                                 |
| 25-29        | 0.00232                                | 0.00232                                          | 0.016746                                                             | 0.025                                                                  | 0.02075                                                 |                                                                                 |
| 30-34        | 0.00368                                | 0.00368                                          | 0.016746                                                             | 0.025                                                                  | 0.02075                                                 |                                                                                 |
| 35-39        | 0.00222                                | 0.00222                                          | 0.016746                                                             | 0.025                                                                  | 0.02075                                                 |                                                                                 |
| 40-44        | 0.00385                                | 0.00385                                          | 0.016746                                                             | 0.025                                                                  | 0.02075                                                 |                                                                                 |
| 45-49        | 0.00457                                | 0.00457                                          | 0.016746                                                             | 0.025                                                                  | 0.02075                                                 |                                                                                 |
| 50-54        | 0.00182                                | 0.00182                                          | 0.016746                                                             | 0.025                                                                  | 0.02075                                                 |                                                                                 |
| 55-59        | 0.00182                                | 0.00182                                          | 0.016746                                                             | 0.025                                                                  | 0.02075                                                 |                                                                                 |
| 60 -64       | 0.00441                                | 0.00441                                          | 0.028414                                                             | 0.037                                                                  | 0.03471                                                 |                                                                                 |
| <b>Men</b>   |                                        |                                                  |                                                                      |                                                                        |                                                         |                                                                                 |
| 15-19        | 0.00286                                | 0.00286                                          | 0.018783                                                             | 0.025                                                                  | 0.01969                                                 | Kuriakose A. et al. 2014. (8), EDHS, 2016 (7, 45, 47-50)                        |
| 20-24        | 0.00319                                | 0.00319                                          | 0.018783                                                             | 0.025                                                                  | 0.01969                                                 |                                                                                 |
| 25-29        | 0.00293                                | 0.00293                                          | 0.018783                                                             | 0.025                                                                  | 0.01969                                                 |                                                                                 |
| 30-34        | 0.00397                                | 0.00397                                          | 0.018783                                                             | 0.025                                                                  | 0.01969                                                 |                                                                                 |
| 35-39        | 0.00411                                | 0.00411                                          | 0.018783                                                             | 0.025                                                                  | 0.01969                                                 |                                                                                 |
| 40-44        | 0.00584                                | 0.00584                                          | 0.018783                                                             | 0.025                                                                  | 0.01969                                                 |                                                                                 |
| 45-49        | 0.0036                                 | 0.0036                                           | 0.018783                                                             | 0.025                                                                  | 0.01969                                                 |                                                                                 |
| 50-54        | 0.00354                                | 0.00354                                          | 0.018783                                                             | 0.025                                                                  | 0.01969                                                 |                                                                                 |
| 55-59        | 0.00354                                | 0.00354                                          | 0.018783                                                             | 0.025                                                                  | 0.01969                                                 |                                                                                 |
| 60-64        | 0.00354                                | 0.00354                                          | 0.030451                                                             | 0.037                                                                  | 0.03365                                                 |                                                                                 |

## References

1. Sorato MM, Davari M, Kebriaeezadeh A, Sarrafzadegan N, Shibru T, Fatemi B. Risk of fatal and nonfatal coronary heart disease and stroke events among adult patients with hypertension: basic Markov model inputs for evaluating cost-effectiveness of hypertension treatment: systematic review of cohort studies. *Journal of Pharmaceutical Health Services Research*. 2021;12(2).
2. Institute. EPH. Ethiopia steps report on risk factors for chronic non-communicable diseases and prevalence of selected NCDs. 2016.
3. Kelemu Tilahun Kibret, Mesfin YM. Prevalence of hypertension in Ethiopia: a systematic meta-analysis. *Public Health Reviews* 2015;36(14).
4. WHO. Non-communicable diseases country profiles 2018. Geneva: World Health Organization. 2018.
5. Helelo TP GY, Adane AA. Prevalence and Associated Factors of Hypertension among Adults in Durame Town, Southern Ethiopia. *PLoS ONE*. 2014;9(11):e112790.
6. Shukuri A, Tewelde T, Shaweno T. Prevalence of old age hypertension and associated factors among older adults in rural Ethiopia. *Integrated blood pressure control*. 2019;12:23-31.
7. ICF C. Ethiopia Demographic and Health Survey 2016, Addis Ababa, Ethiopia, and Rockville, Maryland, USA: CSA and ICF. DF-1.6.
8. Kuriakose A, Nair Anish TS, Soman B, Varghese RT, Sreelal TP, Mendez AM, et al. Rate and Risk of All Cause Mortality among People with Known Hypertension in a Rural Community of Southern Kerala, India: The Results from the Prolife Cohort. *Int J Prev Med*. 2014;5(5):596-603.
9. Getachew F DA, Solomon D. Prevalence of Undiagnosed Hypertension and Associated Factors among Residents in Gulele Sub-City, Addis Ababa, Ethiopia. *J Community Med Health Educ*. 2018;8(590).
10. Antikainen R, Jousilahti P, Tuomilehto J. Systolic blood pressure, isolated systolic hypertension and risk of coronary heart disease, strokes, cardiovascular disease and all-cause mortality in the middle-aged population. *Journal of hypertension*. 1998;16(5):577-83.
11. Ford ES, Giles WH, Mokdad AH. The distribution of 10-year risk for coronary heart disease among US adults: findings from the National Health and Nutrition Examination Survey III. *Journal of the American College of Cardiology*. 2004;43(10):1791-6.
12. Collaborators GRF. Global, regional, and national comparative risk assessment of 84 behavioural, environmental and occupational, and metabolic risks or clusters of risks for 195 countries and territories, 1990–2017: a systematic analysis for the Global Burden of Disease Study 2017. *Lancet (London, England)*. 2018;392(10159):1923.
13. Flint AC, Conell C, Ren X, Banki NM, Chan SL, Rao VA, et al. Effect of systolic and diastolic blood pressure on cardiovascular outcomes. *New England Journal of Medicine*. 2019;381(3):243-51.
14. Rapsomaniki E, Timmis A, George J, Pujades-Rodriguez M, Shah AD, Denaxas S, et al. Blood pressure and incidence of twelve cardiovascular diseases: lifetime risks, healthy life-years lost, and age-specific associations in 1·25 million people. *The Lancet*. 2014;383(9932):1899-911.
15. Lloyd-Jones DM, Larson MG, Beiser A, Levy D. Lifetime risk of developing coronary heart disease. *The Lancet*. 1999;353(9147):89-92.
16. Organization WH. Disability weights, discounting and age weighting of DALYs. Available; 2016.
17. Salomon JA, Haagsma JA, Davis A, de Noordhout CM, Polinder S, Havelaar AH, et al. Disability weights for the Global Burden of Disease 2013 study. *The Lancet Global Health*. 2015;3(11):e712-e23.
18. Vos T, Allen C, Arora M, Barber RM, Bhutta ZA, Brown A, et al. Global, regional, and national incidence, prevalence, and years lived with disability for 310 diseases and injuries, 1990–2015: a systematic analysis for the Global Burden of Disease Study 2015. *The Lancet*. 2016;388(10053):1545-602.
19. Salomon JA, Vos T, Hogan DR, Gagnon M, Naghavi M, Mokdad A, et al. Common values in assessing health outcomes from disease and injury: disability weights measurement study for the Global Burden of Disease Study 2010. *Lancet (London, England)*. 2012;380(9859):2129-43.
20. Lin JK, Moran AE, Bibbins-Domingo K, Falase B, Pedroza Tobias A, Mandke CN, et al. Cost-effectiveness of a fixed-dose combination pill for secondary prevention of cardiovascular disease in China, India, Mexico, Nigeria, and South Africa: a modelling study. *The Lancet Global health*. 2019;7(10):e1346-e58.

21. Global, regional, and national age-sex-specific mortality for 282 causes of death in 195 countries and territories, 1980-2017: a systematic analysis for the Global Burden of Disease Study 2017. *Lancet* (London, England). 2018;392(10159):1736-88.
22. Huffman MD, Mohanan PP, Devarajan R, Baldrige AS, Kondal D, Zhao L, et al. Effect of a Quality Improvement Intervention on Clinical Outcomes in Patients in India With Acute Myocardial Infarction: The ACS QUIK Randomized Clinical Trial. *Jama*. 2018;319(6):567-78.
23. Bundy JD, Li C, Stuchlik P, Bu X, Kelly TN, Mills KT, et al. Systolic Blood Pressure Reduction and Risk of Cardiovascular Disease and Mortality: A Systematic Review and Network Meta-analysis. *JAMA Cardiology*. 2017;2(7):775-81.
24. Petty GW, Brown RD, Jr., Whisnant JP, Sicks JD, O'Fallon WM, Wiebers DO. Survival and recurrence after first cerebral infarction: a population-based study in Rochester, Minnesota, 1975 through 1989. *Neurology*. 1998;50(1):208-16.
25. Health MSf. International Medical Products Price Guide: 2015 edition. 2015.
26. Lee SE, Lee HY, Cho HJ, Choe WS, Kim H, Choi JO, et al. Clinical Characteristics and Outcome of Acute Heart Failure in Korea: Results from the Korean Acute Heart Failure Registry (KorAHF). *Korean circulation journal*. 2017;47(3):341-53.
27. Choi DJ, Han S, Jeon ES, Cho MC, Kim JJ, Yoo BS, et al. Characteristics, outcomes and predictors of long-term mortality for patients hospitalized for acute heart failure: a report from the Korean heart failure registry. *Korean circulation journal*. 2011;41(7):363-71.
28. Steg PG, Bhatt DL, Wilson PWF, D'Agostino R, Ohman EM, Röther J, et al. One-Year Cardiovascular Event Rates in Outpatients With Atherothrombosis. *Jama*. 2007;297(11):1197-206.
29. Robinson TG, Potter JF, Ford GA, Bulpitt CJ, Chernova J, Jagger C, et al. Effects of antihypertensive treatment after acute stroke in the Continue Or Stop post-Stroke Antihypertensives Collaborative Study (COSSACS): a prospective, randomised, open, blinded-endpoint trial. *The Lancet Neurology*. 2010;9(8):767-75.
30. Katsanos AH, Filippatou A, Manios E, Deftereos S, Parissis J, Frogoudaki A, et al. Blood Pressure Reduction and Secondary Stroke Prevention. *Hypertension*. 2017;69(1):171-9.
31. Yasui D, Asayama K, Ohkubo T, Kikuya M, Kanno A, Hara A, et al. Stroke Risk in Treated Hypertension Based on Home Blood Pressure: the Ohasama Study. *American Journal of Hypertension*. 2010;23(5):508-14.
32. Smolina K, Wright FL, Rayner M, Goldacre MJ. Long-Term Survival and Recurrence After Acute Myocardial Infarction in England, 2004 to 2010. *Circulation: Cardiovascular Quality and Outcomes*. 2012;5(4):532-40.
33. Butler J, Kalogeropoulos AP, Georgiopoulou VV, Bibbins-Domingo K, Najjar SS, Sutton-Tyrrell KC, et al. Systolic blood pressure and incident heart failure in the elderly. The Cardiovascular Health Study and the Health, Ageing and Body Composition Study. *Heart*. 2011;97(16):1304.
34. Piller LB, Baraniuk S, Simpson LM, Cushman WC, Massie BM, Einhorn PT, et al. Long-term follow-up of participants with heart failure in the antihypertensive and lipid-lowering treatment to prevent heart attack trial (ALLHAT). *Circulation*. 2011;124(17):1811-8.
35. Davis BR, Kostis JB, Simpson LM, Black HR, Cushman WC, Einhorn PT, et al. Heart Failure With Preserved and Reduced Left Ventricular Ejection Fraction in the Antihypertensive and Lipid-Lowering Treatment to Prevent Heart Attack Trial. *Circulation*. 2008;118(22):2259-67.
36. Moita B, Marques AP, Camacho AM, Leão Neves P, Santana R. One-year rehospitalisations for congestive heart failure in Portuguese NHS hospitals: a multilevel approach on patterns of use and contributing factors. *BMJ open*. 2019;9(9):e031346.
37. Chamberlain AM, Dunlay SM, Gerber Y, Manemann SM, Jiang R, Weston SA, et al. Burden and Timing of Hospitalizations in Heart Failure: A Community Study. *Mayo Clinic proceedings*. 2017;92(2):184-92.
38. Law MR, Morris JK, Wald NJ. Use of blood pressure lowering drugs in the prevention of cardiovascular disease: meta-analysis of 147 randomised trials in the context of expectations from prospective epidemiological studies. *BMJ (Clinical research ed)*. 2009;338:b1665.
39. Asayama K. Observational study and participant-level meta-analysis on antihypertensive drug treatment-related cardiovascular risk. *Hypertension Research*. 2017;40(10):856-60.

- 1  
2  
3 40. Cherry SB, Benner JS, Hussein MA, Tang SSK, Nichol MB. The Clinical and Economic Burden of  
4 Nonadherence with Antihypertensive and Lipid-Lowering Therapy in Hypertensive Patients. *Value in Health*.  
5 2009;12(4):489-97.
- 6 41. Liu L, Wang Z, Gong L, Zhang Y, Thijs L, Staessen JA, et al. Blood pressure reduction for the  
7 secondary prevention of stroke: a Chinese trial and a systematic review of the literature. *Hypertension Research*.  
8 2009;32(11):1032-40.
- 9 42. Stenberg K, Lauer JA, Gkoutouras G, Fitzpatrick C, Stanciole A. Econometric estimation of WHO-  
10 CHOICE country-specific costs for inpatient and outpatient health service delivery. *Cost Effectiveness and*  
11 *Resource Allocation*. 2018;16(1):11.
- 12 43. Health FMO. National strategic action plan (NSAP) for prevention & control of non-communicable  
13 diseases in Ethiopia, 2014-2016. 2014:43-7.
- 14 44. Organization WH. WHO-CHOICE Estimates of Cost for Inpatient and Outpatient Health Service  
15 Delivery.
- 16 45. Zhou D, Xi B, Zhao M, Wang L, Veeranki SP. Uncontrolled hypertension increases risk of all-cause  
17 and cardiovascular disease mortality in US adults: the NHANES III Linked Mortality Study. *Sci Rep*.  
18 2018;8(1):9418.
- 19 46. Ko MJ, Jo AJ, Park CM, Kim HJ, Kim YJ, Park D-W. Level of blood pressure control and  
20 cardiovascular events: SPRINT criteria versus the 2014 hypertension recommendations. *Journal of the*  
21 *American College of Cardiology*. 2016;67(24):2821-31.
- 22 47. Gu Q, Dillon CF, Burt VL, Gillum RF. Association of Hypertension Treatment and Control With All-  
23 Cause and Cardiovascular Disease Mortality Among US Adults With Hypertension. *American Journal of*  
24 *Hypertension*. 2010;23(1):38-45.
- 25 48. Murakami Y, Hozawa A, Okamura T, Ueshima H. Relation of Blood Pressure and All-Cause Mortality  
26 in 180 000 Japanese Participants. *Hypertension*. 2008;51(6):1483-91.
- 27 49. Nagai K, Yamagata K, Iseki K, Moriyama T, Tsuruya K, Fujimoto S, et al. Antihypertensive treatment  
28 and risk of cardiovascular mortality in patients with chronic kidney disease diagnosed based on the presence of  
29 proteinuria and renal function: A large longitudinal study in Japan. *PLoS One*. 2019;14(12):e0225812.
- 30 50. Gudmundsson LS, Johannsson M, Thorgeirsson G, Sigfusson N, Sigvaldason H, Wittman JCM. Risk  
31 profiles and prognosis of treated and untreated hypertensive men and women in a population-based  
32 longitudinal study The Reykjavik Study. *Journal of Human Hypertension*. 2004;18(9):615-22.
- 33  
34  
35  
36  
37  
38  
39  
40  
41  
42  
43  
44  
45  
46  
47  
48  
49  
50  
51  
52  
53  
54  
55  
56  
57  
58  
59  
60

# Reporting checklist for economic evaluation of health interventions.

Based on the CHEERS guidelines.

## Instructions to authors

Complete this checklist by entering the page numbers from your manuscript where readers will find each of the items listed below.

Your article may not currently address all the items on the checklist. Please modify your text to include the missing information. If you are certain that an item does not apply, please write "n/a" and provide a short explanation.

Upload your completed checklist as an extra file when you submit to a journal.

In your methods section, say that you used the CHEERS reporting guidelines, and cite them as:

Husereau D, Drummond M, Petrou S, Carswell C, Moher D, Greenberg D, Augustovski F, Briggs AH, Mauskopf J, Loder E. Consolidated Health Economic Evaluation Reporting Standards (CHEERS) statement.

| Title | Reporting Item                                                                                                                                                                    | Page Number |
|-------|-----------------------------------------------------------------------------------------------------------------------------------------------------------------------------------|-------------|
|       | <p><a href="#">#1</a> Identify the study as an economic evaluation or use more specific terms such as “cost-effectiveness analysis”, and describe the interventions compared.</p> | 1           |



## Abstract

**#2** Provide a structured summary of objectives, perspective, setting, methods (including study design and inputs), results (including base case and uncertainty analyses), and conclusions

## Introduction

**#3** Provide an explicit statement of the broader context for the study. Present the study question and its relevance for health policy or practice decisions

## Methods

**#4** Describe characteristics of the base case population and subgroups analysed, including why they were chosen.

**#5** State relevant aspects of the system(s) in which the decision(s) need(s) to be made.

**#6** Describe the perspective of the study and relate this to the costs being evaluated.

**#7** Describe the interventions or strategies being compared and state why they were chosen.

|    |                        |                     |                                                      |     |
|----|------------------------|---------------------|------------------------------------------------------|-----|
| 1  | Time horizon           | <a href="#">#8</a>  | State the time horizon(s) over which costs and       | 2   |
| 2  |                        |                     |                                                      |     |
| 3  |                        |                     | consequences are being evaluated and say why         |     |
| 4  |                        |                     | appropriate.                                         |     |
| 5  |                        |                     |                                                      |     |
| 6  |                        |                     |                                                      |     |
| 7  |                        |                     |                                                      |     |
| 8  |                        |                     |                                                      |     |
| 9  | Discount rate          | <a href="#">#9</a>  | Report the choice of discount rate(s) used for costs | 10  |
| 10 |                        |                     |                                                      |     |
| 11 |                        |                     | and outcomes and say why appropriate                 |     |
| 12 |                        |                     |                                                      |     |
| 13 |                        |                     |                                                      |     |
| 14 | Choice of health       | <a href="#">#10</a> | Describe what outcomes were used as the              | NA  |
| 15 | outcomes               |                     | measure(s) of benefit in the evaluation and their    |     |
| 16 |                        |                     | relevance for the type of analysis performed         |     |
| 17 |                        |                     |                                                      |     |
| 18 |                        |                     |                                                      |     |
| 19 |                        |                     |                                                      |     |
| 20 |                        |                     |                                                      |     |
| 21 |                        |                     |                                                      |     |
| 22 | Measurement of         | <a href="#">#11</a> | Single study-based estimates: Describe fully the     | 4-6 |
| 23 | effectiveness          | <a href="#">a</a>   | design features of the single effectiveness study    |     |
| 24 |                        |                     | and why the single study was a sufficient source of  |     |
| 25 |                        |                     | clinical effectiveness data                          |     |
| 26 |                        |                     |                                                      |     |
| 27 |                        |                     |                                                      |     |
| 28 |                        |                     |                                                      |     |
| 29 |                        |                     |                                                      |     |
| 30 |                        |                     |                                                      |     |
| 31 |                        |                     |                                                      |     |
| 32 | Measurement of         | <a href="#">#11</a> | Synthesis-based estimates: Describe fully the        | NA  |
| 33 | effectiveness          | <a href="#">b</a>   | methods used for identification of included studies  |     |
| 34 |                        |                     | and synthesis of clinical effectiveness data         |     |
| 35 |                        |                     |                                                      |     |
| 36 |                        |                     |                                                      |     |
| 37 |                        |                     |                                                      |     |
| 38 |                        |                     |                                                      |     |
| 39 | Measurement and        | <a href="#">#12</a> | If applicable, describe the population and methods   | NA  |
| 40 | valuation of           |                     | used to elicit preferences for outcomes.             |     |
| 41 |                        |                     |                                                      |     |
| 42 |                        |                     |                                                      |     |
| 43 | preference based       |                     |                                                      |     |
| 44 | outcomes               |                     |                                                      |     |
| 45 |                        |                     |                                                      |     |
| 46 |                        |                     |                                                      |     |
| 47 |                        |                     |                                                      |     |
| 48 |                        |                     |                                                      |     |
| 49 | **Estimating resources |                     |                                                      |     |
| 50 |                        |                     |                                                      |     |
| 51 |                        |                     |                                                      |     |
| 52 | and costs **           |                     |                                                      |     |
| 53 |                        |                     |                                                      |     |
| 54 |                        |                     |                                                      |     |
| 55 |                        | <a href="#">#13</a> | Single study-based economic evaluation: Describe     | NA  |
| 56 |                        |                     |                                                      |     |
| 57 |                        | <a href="#">a</a>   | approaches used to estimate resource use             |     |
| 58 |                        |                     |                                                      |     |
| 59 |                        |                     |                                                      |     |
| 60 |                        |                     |                                                      |     |

1 associated with the alternative interventions.

2 Describe primary or secondary research methods

3 for valuing each resource item in terms of its unit

4 cost. Describe any adjustments made to

5 approximate to opportunity costs

## 6 Methods

|    |                       |                     |                                                     |
|----|-----------------------|---------------------|-----------------------------------------------------|
| 7  |                       |                     |                                                     |
| 8  |                       |                     |                                                     |
| 9  |                       |                     |                                                     |
| 10 |                       |                     |                                                     |
| 11 |                       |                     |                                                     |
| 12 |                       |                     |                                                     |
| 13 |                       |                     |                                                     |
| 14 |                       |                     |                                                     |
| 15 |                       |                     |                                                     |
| 16 | Estimating resources  | <a href="#">#13</a> | Model-based economic evaluation: Describe           |
| 17 |                       |                     |                                                     |
| 18 | and costs             | <a href="#">b</a>   | approaches and data sources used to estimate        |
| 19 |                       |                     | resource use associated with model health states.   |
| 20 |                       |                     |                                                     |
| 21 |                       |                     | Describe primary or secondary research methods      |
| 22 |                       |                     |                                                     |
| 23 |                       |                     | for valuing each resource item in terms of its unit |
| 24 |                       |                     |                                                     |
| 25 |                       |                     | cost. Describe any adjustments made to              |
| 26 |                       |                     |                                                     |
| 27 |                       |                     | approximate to opportunity costs.                   |
| 28 |                       |                     |                                                     |
| 29 |                       |                     |                                                     |
| 30 |                       |                     |                                                     |
| 31 |                       |                     |                                                     |
| 32 | Currency, price date, | <a href="#">#14</a> | Report the dates of the estimated resource          |
| 33 |                       |                     |                                                     |
| 34 | and conversion        |                     | quantities and unit costs. Describe methods for     |
| 35 |                       |                     |                                                     |
| 36 |                       |                     | adjusting estimated unit costs to the year of       |
| 37 |                       |                     |                                                     |
| 38 |                       |                     | reported costs if necessary. Describe methods for   |
| 39 |                       |                     |                                                     |
| 40 |                       |                     | converting costs into a common currency base and    |
| 41 |                       |                     |                                                     |
| 42 |                       |                     | the exchange rate.                                  |
| 43 |                       |                     |                                                     |
| 44 |                       |                     |                                                     |
| 45 |                       |                     |                                                     |
| 46 |                       |                     |                                                     |
| 47 | Choice of model       | <a href="#">#15</a> | Describe and give reasons for the specific type of  |
| 48 |                       |                     |                                                     |
| 49 |                       |                     | decision analytical model used. Providing a figure  |
| 50 |                       |                     |                                                     |
| 51 |                       |                     | to show model structure is strongly recommended.    |
| 52 |                       |                     |                                                     |
| 53 |                       |                     |                                                     |
| 54 | Assumptions           | <a href="#">#16</a> | Describe all structural or other assumptions        |
| 55 |                       |                     |                                                     |
| 56 |                       |                     | underpinning the decision-analytical model.         |
| 57 |                       |                     |                                                     |
| 58 |                       |                     |                                                     |
| 59 |                       |                     |                                                     |
| 60 |                       |                     |                                                     |

6-9

9

Supplementary

figure 1

9

|    |                    |                     |                                                      |    |
|----|--------------------|---------------------|------------------------------------------------------|----|
| 1  | Analytical methods | <a href="#">#17</a> | Describe all analytical methods supporting the       | 9  |
| 2  |                    |                     | evaluation. This could include methods for dealing   |    |
| 3  |                    |                     | with skewed, missing, or censored data;              |    |
| 4  |                    |                     | extrapolation methods; methods for pooling data;     |    |
| 5  |                    |                     | approaches to validate or make adjustments (such     |    |
| 6  |                    |                     | as half cycle corrections) to a model; and methods   |    |
| 7  |                    |                     | for handling population heterogeneity and            |    |
| 8  |                    |                     | uncertainty.                                         |    |
| 9  |                    |                     |                                                      |    |
| 10 |                    |                     |                                                      |    |
| 11 |                    |                     |                                                      |    |
| 12 |                    |                     |                                                      |    |
| 13 |                    |                     |                                                      |    |
| 14 |                    |                     |                                                      |    |
| 15 |                    |                     |                                                      |    |
| 16 |                    |                     |                                                      |    |
| 17 |                    |                     |                                                      |    |
| 18 |                    |                     |                                                      |    |
| 19 |                    |                     |                                                      |    |
| 20 | <b>Results</b>     |                     |                                                      |    |
| 21 |                    |                     |                                                      |    |
| 22 |                    |                     |                                                      |    |
| 23 | Study parameters   | <a href="#">#18</a> | Report the values, ranges, references, and, if used, | 11 |
| 24 |                    |                     | probability distributions for all parameters. Report |    |
| 25 |                    |                     | reasons or sources for distributions used to         |    |
| 26 |                    |                     | represent uncertainty where appropriate. Providing   |    |
| 27 |                    |                     | a table to show the input values is strongly         |    |
| 28 |                    |                     | recommended.                                         |    |
| 29 |                    |                     |                                                      |    |
| 30 |                    |                     |                                                      |    |
| 31 |                    |                     |                                                      |    |
| 32 |                    |                     |                                                      |    |
| 33 |                    |                     |                                                      |    |
| 34 |                    |                     |                                                      |    |
| 35 |                    |                     |                                                      |    |
| 36 |                    |                     |                                                      |    |
| 37 |                    |                     |                                                      |    |
| 38 | Incremental costs  | <a href="#">#19</a> | For each intervention, report mean values for the    | 11 |
| 39 |                    |                     | main categories of estimated costs and outcomes      |    |
| 40 | and outcomes       |                     | of interest, as well as mean differences between     |    |
| 41 |                    |                     | the comparator groups. If applicable, report         |    |
| 42 |                    |                     | incremental cost-effectiveness ratios.               |    |
| 43 |                    |                     |                                                      |    |
| 44 |                    |                     |                                                      |    |
| 45 |                    |                     |                                                      |    |
| 46 |                    |                     |                                                      |    |
| 47 |                    |                     |                                                      |    |
| 48 |                    |                     |                                                      |    |
| 49 |                    |                     |                                                      |    |
| 50 | Characterising     | <a href="#">#20</a> | Single study-based economic evaluation: Describe     | NA |
| 51 |                    |                     | the effects of sampling uncertainty for the          |    |
| 52 | uncertainty        | <a href="#">a</a>   | estimated incremental cost and incremental           |    |
| 53 |                    |                     | effectiveness parameters, together with the impact   |    |
| 54 |                    |                     |                                                      |    |
| 55 |                    |                     |                                                      |    |
| 56 |                    |                     |                                                      |    |
| 57 |                    |                     |                                                      |    |
| 58 |                    |                     |                                                      |    |
| 59 |                    |                     |                                                      |    |
| 60 |                    |                     |                                                      |    |

of methodological assumptions (such as discount rate, study perspective).

|    |                       |                     |                                                       |
|----|-----------------------|---------------------|-------------------------------------------------------|
| 1  |                       |                     |                                                       |
| 2  |                       |                     |                                                       |
| 3  |                       |                     |                                                       |
| 4  |                       |                     |                                                       |
| 5  |                       |                     |                                                       |
| 6  | Characterising        | <a href="#">#20</a> | Model-based economic evaluation: Describe the         |
| 7  |                       |                     |                                                       |
| 8  | uncertainty           | <a href="#">b</a>   | effects on the results of uncertainty for all input   |
| 9  |                       |                     |                                                       |
| 10 |                       |                     | parameters, and uncertainty related to the structure  |
| 11 |                       |                     |                                                       |
| 12 |                       |                     | of the model and assumptions.                         |
| 13 |                       |                     |                                                       |
| 14 |                       |                     |                                                       |
| 15 | Characterising        | <a href="#">#21</a> | If applicable, report differences in costs, outcomes, |
| 16 |                       |                     |                                                       |
| 17 | heterogeneity         |                     | or cost effectiveness that can be explained by        |
| 18 |                       |                     |                                                       |
| 19 |                       |                     | variations between subgroups of patients with         |
| 20 |                       |                     |                                                       |
| 21 |                       |                     | different baseline characteristics or other observed  |
| 22 |                       |                     |                                                       |
| 23 |                       |                     | variability in effects that are not reducible by more |
| 24 |                       |                     |                                                       |
| 25 |                       |                     | information.                                          |
| 26 |                       |                     |                                                       |
| 27 |                       |                     |                                                       |
| 28 |                       |                     |                                                       |
| 29 |                       |                     |                                                       |
| 30 | <b>Discussion</b>     |                     |                                                       |
| 31 |                       |                     |                                                       |
| 32 |                       |                     |                                                       |
| 33 | Study findings,       | <a href="#">#22</a> | Summarise key study findings and describe how         |
| 34 |                       |                     |                                                       |
| 35 | limitations,          |                     | they support the conclusions reached. Discuss         |
| 36 |                       |                     |                                                       |
| 37 | generalisability, and |                     | limitations and the generalisability of the findings  |
| 38 |                       |                     |                                                       |
| 39 | current knowledge     |                     | and how the findings fit with current knowledge.      |
| 40 |                       |                     |                                                       |
| 41 |                       |                     |                                                       |
| 42 |                       |                     |                                                       |
| 43 | <b>Other</b>          |                     |                                                       |
| 44 |                       |                     |                                                       |
| 45 |                       |                     |                                                       |
| 46 | Source of funding     | <a href="#">#23</a> | Describe how the study was funded and the role of     |
| 47 |                       |                     |                                                       |
| 48 |                       |                     | the funder in the identification, design, conduct,    |
| 49 |                       |                     |                                                       |
| 50 |                       |                     | and reporting of the analysis. Describe other non-    |
| 51 |                       |                     |                                                       |
| 52 |                       |                     | monetary sources of support                           |
| 53 |                       |                     |                                                       |
| 54 |                       |                     |                                                       |
| 55 |                       |                     |                                                       |
| 56 |                       |                     |                                                       |
| 57 |                       |                     |                                                       |
| 58 |                       |                     |                                                       |
| 59 |                       |                     |                                                       |
| 60 |                       |                     |                                                       |

1 Conflict of interest [#24](#) Describe any potential for conflict of interest of 23  
2  
3 study contributors in accordance with journal  
4 policy. In the absence of a journal policy, we  
5 recommend authors comply with International  
6 Committee of Medical Journal Editors  
7 recommendations  
8  
9  
10  
11  
12  
13  
14

15  
16 Notes:

- 17  
18  
19 • 15: Supplementary figure 1 The CHEERS checklist is distributed under the terms of the Creative  
20 Commons Attribution License CC-BY-NC. This checklist was completed on 20. August 2021  
21 using <https://www.goodreports.org/>, a tool made by the [EQUATOR Network](#) in collaboration with  
22 [Penelope.ai](#)  
23  
24  
25  
26  
27  
28  
29  
30  
31  
32  
33  
34  
35  
36  
37  
38  
39  
40  
41  
42  
43  
44  
45  
46  
47  
48  
49  
50  
51  
52  
53  
54  
55  
56  
57  
58  
59  
60



# BMJ Open

## Societal economic burden of hypertension at selected hospitals in southern Ethiopia; a patient-level analysis

|                                 |                                                                                                                                                                                                                                                                                                                                                                                                                                                                                                                                                                                                                                                                                                                      |
|---------------------------------|----------------------------------------------------------------------------------------------------------------------------------------------------------------------------------------------------------------------------------------------------------------------------------------------------------------------------------------------------------------------------------------------------------------------------------------------------------------------------------------------------------------------------------------------------------------------------------------------------------------------------------------------------------------------------------------------------------------------|
| Journal:                        | <i>BMJ Open</i>                                                                                                                                                                                                                                                                                                                                                                                                                                                                                                                                                                                                                                                                                                      |
| Manuscript ID                   | bmjopen-2021-056627.R1                                                                                                                                                                                                                                                                                                                                                                                                                                                                                                                                                                                                                                                                                               |
| Article Type:                   | Original research                                                                                                                                                                                                                                                                                                                                                                                                                                                                                                                                                                                                                                                                                                    |
| Date Submitted by the Author:   | 15-Feb-2022                                                                                                                                                                                                                                                                                                                                                                                                                                                                                                                                                                                                                                                                                                          |
| Complete List of Authors:       | Sorato, Mende; Arba Minch University, Pharmacy; Tehran University of Medical Sciences School of Pharmacy, Pharmacoeconomics and Pharmaceutical administration<br>Davari, Majid; Tehran University of Medical Sciences, Pharmacoeconomics and Pharmaceutical Management<br>Kebriaeezadeh, Abbas; Tehran University of Medical Sciences School of Pharmacy, Pharmacoeconomics and Pharmaceutical Management<br>Sarrafzadegan, Nizal; Isfahan University of Medical Sciences, Isfahan Cardiovascular Research Center; University of British Columbia, School of Population and Public Health, Faculty of Medicine<br>Shibru, Tamiru; Arba Minch University, School of Medicine, College of Medicine and Health Sciences |
| <b>Primary Subject Heading</b>: | Health economics                                                                                                                                                                                                                                                                                                                                                                                                                                                                                                                                                                                                                                                                                                     |
| Secondary Subject Heading:      | Cardiovascular medicine, Health services research, Public health, Health policy                                                                                                                                                                                                                                                                                                                                                                                                                                                                                                                                                                                                                                      |
| Keywords:                       | Health economics < HEALTH SERVICES ADMINISTRATION & MANAGEMENT, HEALTH ECONOMICS, Cardiology < INTERNAL MEDICINE, Hypertension < CARDIOLOGY                                                                                                                                                                                                                                                                                                                                                                                                                                                                                                                                                                          |
|                                 |                                                                                                                                                                                                                                                                                                                                                                                                                                                                                                                                                                                                                                                                                                                      |

SCHOLARONE™  
Manuscripts



I, the Submitting Author has the right to grant and does grant on behalf of all authors of the Work (as defined in the below author licence), an exclusive licence and/or a non-exclusive licence for contributions from authors who are: i) UK Crown employees; ii) where BMJ has agreed a CC-BY licence shall apply, and/or iii) in accordance with the terms applicable for US Federal Government officers or employees acting as part of their official duties; on a worldwide, perpetual, irrevocable, royalty-free basis to BMJ Publishing Group Ltd ("BMJ") its licensees and where the relevant Journal is co-owned by BMJ to the co-owners of the Journal, to publish the Work in this journal and any other BMJ products and to exploit all rights, as set out in our [licence](#).

The Submitting Author accepts and understands that any supply made under these terms is made by BMJ to the Submitting Author unless you are acting as an employee on behalf of your employer or a postgraduate student of an affiliated institution which is paying any applicable article publishing charge ("APC") for Open Access articles. Where the Submitting Author wishes to make the Work available on an Open Access basis (and intends to pay the relevant APC), the terms of reuse of such Open Access shall be governed by a Creative Commons licence – details of these licences and which [Creative Commons](#) licence will apply to this Work are set out in our licence referred to above.

Other than as permitted in any relevant BMJ Author's Self Archiving Policies, I confirm this Work has not been accepted for publication elsewhere, is not being considered for publication elsewhere and does not duplicate material already published. I confirm all authors consent to publication of this Work and authorise the granting of this licence.

# Societal economic burden of hypertension at selected hospitals in southern Ethiopia; a patient-level analysis

## Authors:

### 1. Mende Mensa Sorato\* (B.Pharm, MSc. PhD Candidate)

**Address:** Department of Pharmacy, Arba Minch University and Faculty of Pharmacy, Department of Pharmacoeconomics and pharmaceutical Administration.

Tehran University of Medical Sciences

Gmail: [mendemensa@gmail.com](mailto:mendemensa@gmail.com)

**ORCID:** [0000-0002-6342-0980](https://orcid.org/0000-0002-6342-0980)

Mobile: +98-9056309138

P.O. Box: 21

**Mailing Address:** Arba Minch Ethiopia

### 2. Dr. Majid Davari (PharmD, PhD in Health/Pharmacoeconomics)

Email: [M-davari@tums.ac.ir](mailto:M-davari@tums.ac.ir)

Mobile: [+98-9134128963](tel:+98-9134128963)

Address: Tehran University of Medical Sciences, Faculty of Pharmacy, Department of Pharmacoeconomics and pharmaceutical Administration

### 3. Dr. Abbas Kebriaeezadeh (PharmD, PhD in Pharmacology)

Email: [kebriace@tums.ac.ir](mailto:kebriace@tums.ac.ir)

Mobile: [+98-9122052460](tel:+98-9122052460)

**Address:** Tehran University of Medical Sciences, Faculty of Pharmacy, Department of Pharmacoeconomics and pharmaceutical Administration.

### 4. Dr. Nizal Sarrafzadegan ( MTMD MPH, MD)

Email: [nsarrafzadegan@gmail.com](mailto:nsarrafzadegan@gmail.com)

**Address:** Director of Isfahan Cardiovascular Research Center, WHO Collaborating Center in EMR, Isfahan University of Medical Sciences

### 5. Dr. Tamiru Shibru (Internist)

Tel (cell): +251-911-70-47-67

Email: [drtamshib1@gmail.com](mailto:drtamshib1@gmail.com)

**Address:** Arba Minch University, *College of medicine and health sciences*

\* Corresponding Author

**Word Count:** 5546

**Number of references:** 74

**Abstract Count:** 296

**Key Words:** Hypertension; Economic burden of Hypertension; Cost of Illness study; Southern Ethiopia

## I. Abstract

**Objectives:** There is inadequate information on the economic burden of hypertension treatment in Ethiopia. Therefore, this study was conducted to determine the societal economic burden of hypertension at Selected Hospitals in Southern Ethiopia.

**Methods:** Prevalence-based cost of illness (COI) study from a societal perspective was conducted. Disability-adjusted life years (DALYs) were determined by the current world health organization's recommended DALY valuation method. Adjustment for comorbidity and a 3% discount was done for DALYs. The data entry, processing, and analysis were done by using SPSS version 21.0 and Microsoft Excel 2013.

**Results:** We followed a cohort of 406 adult hypertensive patients retrospectively for 10 years from September 2010 to 2020. About two-thirds, 250 (61.6%) of patients were females with a mean age of  $55.87 \pm 11.03$  years. Less than 1 in five 75 (18.5%) of patients achieved their blood pressure control target. A total of 309,261.91 United States Dollar (\$US) direct cost was incurred due to hypertension. A total of 11,606 years and 579.57 years were lost due to hypertension-related premature mortality and morbidity respectively. Treated and uncontrolled hypertension 44.8% (6824) total years lost due to premature mortality from total hypertension cohort. Treated and uncontrolled hypertension accounted for one-half 2,937.72 (50.84%) of productive life years lost. Total productivity loss due to premature mortality and morbidity was \$US 449,394.69.

**Conclusion:** Societal economic burden of hypertension in Southern Ethiopia was substantial. Indirect costs accounted for more than eight out of 10 dollars. Treated and uncontrolled hypertension took the lion's share of economic cost and productivity loss due to premature mortality and morbidity. Therefore, designing and implanting strategies for the prevention of hypertension, early screening, and detection, and improving the rate of blood pressure control by involving all relevant stakeholders at all levels is critical to saving scarce health resources.

### Strengths and limitations of this study

- Using the cardiovascular disease policy model adapted to Sub-Saharan African perspective,
- Including productivity loss costs associated with hypertension (premature mortality and morbidity) and
- Obtaining all simulation variables and transition probability data from valid sources (systematic reviews, randomized controlled trials, and prospective cohort studies) were strength of this study
- Uncertainty in age and sex-specific prevalence of undiagnosed hypertension and variability in employment rate which require due consideration during applying the findings of this study were limitations.

## 1. Introduction

Hypertension doubles the risk of death from stroke, heart disease, vascular diseases, diabetes, atherosclerosis, and kidney disease (1). According to the national STEPS survey, only 28.4% of hypertensive patients were taking antihypertensive medication prescribed by professionals in Ethiopia (2). According to the International Society of hypertension global hypertension practice guideline 2020, hypertension remains the leading cause of death globally, accounting for 10.4 million deaths per year (3).

Hypertension is associated with societal and economic consequences particularly in Low and middle-income countries (LMICs). In addition to the direct costs associated with health care utilization for the management of complications, hypertension causes significant productivity loss from disability and premature death (4, 5). WHO report from South East Asian region also indicated huge impact of hypertension in national finances due to premature death, disability, personal and family disruption, loss of income, and healthcare expenditure (6). According to a WHO report in 2017, stroke, coronary heart disease, and hypertension caused 39,571, 46,943, and 11,050 deaths respectively (i.e. 30 patients per day die due hypertension) in Ethiopia (7).

Cost of illness (COI) study is used to measure the economic burden of disease to individuals, communities, and society as a whole. It can provide information to support the political process and healthcare decision-making if it is conducted from a societal perspective by using an appropriate approach and bottom-up costing strategy (8-10) (11, 12). Despite this huge impact on national economies, the economic burden of hypertension is not studied in Ethiopia particularly Southern Ethiopia. To fill this evidence gap, this study was conducted to determine the economic burden of hypertension at selected public hospitals in Southern Ethiopia by using the prevalence-based cost-of-illness method from a societal perspective to estimate the direct and indirect costs of hypertension in a given year (2021) in Southern Ethiopia.

## 2. Methods and Materials

### 2.1. Study design, Area and Period

A prevalence-based retrospective cost of illness study from societal perspective focusing on quantifying direct and indirect costs was conducted from September 2010- September 2020 in at three selected public hospitals Southern Ethiopia. The bottom-up approach was used to estimate the economic burden of hypertension in Southern Ethiopia (figure 1). The human capital approach was used to calculate indirect costs separately in males and females and also among different age groups. A prevalence-based COI model was constructed in which hypertensive patients were simulated from diagnosis through active treatment, palliative care, and death over 15-64 years. Age and sex-specific mortality rates, measures of productivity, and workforce statistics were used to simulate the progression of these cohorts until death or age 64 years. First, the model estimated cumulative years of life and DALYs lived for the working-age population who had hypertension. Then the

1  
2  
3 model re-simulated with the hypothetical assumption that they did not have hypertension, with relevant changes  
4 to mortality rates and productivity. We estimated the probability of death separately for (1) all-cause mortality  
5 in absence of hypertension and related complications and (2) mortality attributable to the included disease  
6 states. The first component was estimated using WHO Life Tables, and the second component was calculated  
7 based on standardized mortality ratios extracted from the literature. The natural history study conducted in  
8 1974 showed that the mortality rate was 1.85 (3.01 in males and 1.62 in females) (13). Interventional trials  
9 suggested that it could be possible to achieve effective BP targets in about 70% of patients by improving  
10 adherence and/or intensifying therapy (14).  
11  
12  
13  
14  
15

## 16 **2.2. Study populations**

17  
18 The study populations were selected adult hypertensive patients at three selected public hospitals. According  
19 to the world population prospect 2020 estimate (15). In the same year, the population of the Gamo zone  
20 accounted for 1.5% of the total population, Gofa, and South Omo Zone 1.5% of the total population. The  
21 target population is 3.0% total population of Ethiopia or 20% of the Southern Ethiopian population  
22 (6,208,034). Based on age distribution: 0-14 years are children, 15-24 years are early working age, 25-54 years  
23 are prime working age, 55-64 years are mature working age and  $\geq 65$  years are elderly (13).  
24  
25  
26  
27  
28

## 29 **2.3. Inclusion and exclusion criteria**

30  
31 We included all adult hypertensive patients having at least five years of follow-up visits before data collection  
32 and receiving care during the study period from selected facilities. However, patients who are unwilling to  
33 participate in this study, patients who have less than five years of follow-up, and incomplete patient records  
34 (don't contain follow-up BP records and refill medications, laboratory requests, and results) were excluded.  
35  
36  
37  
38

## 39 **2.4. Study Variables**

### 40 **Dependent Variables**

- 41 • Economic burden of hypertension

### 42 **Independent variables**

- 43 • Patient-related (socio-demographic characteristics, heart disease knowledge, healthy lifestyle and heart  
44 disease risk perception, presence of comorbidity, type of medications, treatment adherence, shared decision  
45 making, health-related quality Life)

### 46 **Cost related variables**

- 47 ○ **Medical costs** (inpatient hospital stay/hospitalization cost, outpatient clinic visit, drug acquisition costs,  
48 drug administration cost, laboratory test, and imaging study costs)

- **Non-medical costs** (transportation, meal, patient time cost due to treatment, cost due informal care by family or friends)
- **Indirect costs** (absenteeism, presenteeism, unemployment, early retirement, disability, premature death)

## 2.5. Sample Size and Sampling Technique

### 2.5.1. Sample size determination

The sample size was determined by using the single population proportion formula by taking prevalence of patients controlled their BP as 14% from WHO 2016 BP control rate report (16-18) and Z value of 1.96 at 95% confidence interval. We added 10% for non-response rate and two for design effect due to multi-stage sampling technique involvement. Finally, a formula giving a larger sample size was used. Total 407 hypertensive adult patients who are on follow-up care will be included.

$$n = \frac{(Z\alpha/2)^2 P (1-P)}{d^2} = 185$$

Where: **n** = is the sample size

$$= 185 + (185 * 10\%) = 203.5$$

$$= 203.5 * 2 = 407$$

- **Z<sup>2</sup>**= standard normal deviation, set at 1.96, correspond to the 95% confidence interval
- **d** = is the desired level of precision/margin of error (0.05)
- **p**= prevalence of patients taking anti-hypertensive (p=28.4%), and q is 1-p.

### 2.5.2. Sampling Techniques

A multi-stage simple random sampling technique was used. We randomly selected three zones from a total of 12 zones found in the Southern region. Three general public hospitals with experience of providing CVD care for at least five years from selected four zones were included in this study. The total sample size was allocated to these hospitals based on an estimated number of adult hypertensive patients attending respective hospitals (i.e., we included 212 patients from Arba Minch General Hospital, 107 patients from Jinka General Hospital, and 88 patients from Sawula General Hospital). Finally, a consecutive sampling technique was applied in each facility until the desired sample size was achieved.

## 2.6. Data collection tools and Procedures

### 2.6.1. Model input parameters

Key model input variables include; 2020 population of selected zones, hypertension prevalence by treatment and control status, Transition probabilities to death and healthy state, cost of diagnosis, and management. Among those with treated hypertension, treated and controlled hypertension was defined based on BP control target of ISH 2020 guideline (3). We used national STPES survey data to estimate the prevalence of cardiovascular risk factors (MI, angina, heart failure, stroke, TIA). Incorporating the risk factor prevalence data in the relevant Framingham risk equation, the age and sex-specific probability of CHD and cerebrovascular disease (i.e., stroke and transient ischemic attack) events were estimated. The probability of each health state



1  
2  
3 was calculated using the age- and sex-specific CHD and cerebrovascular disease event distributions (2, 19). To  
4 estimate the corresponding probabilities, separate relative risk estimates were used for CHD events (Stable  
5 Angina, Unstable Angina, and MI) and cerebrovascular diseases (Stroke and Transient Ischemic Attack),  
6 assuming that antihypertensive treatment affects the probability of every disease state similarly across all age  
7 and sex groups. Relative risk reductions attributable to antihypertensive treatment were extracted from the  
8 peer-reviewed literature (20-22).  
9  
10  
11

12  
13 The 2020 world population prospect estimate was used for the baseline population and number of 33-year-olds  
14 projected to enter the model population from 2020-2070 (15). The annual probability of coronary heart disease  
15 and stroke was based on national STEPS survey (2), and Framingham Heart Study (23) and the Framingham  
16 Offspring Study (24), by contextualizing to Ethiopian scenario. Incident coronary heart disease events were  
17 allocated to angina pectoris, myocardial infarction, or cardiac arrest. Prevalence, joint distributions, and means  
18 of Ethiopia risk factor values were estimated from the national STEPS survey (2). Annual transition rates  
19 between risk factor levels were calculated to preserve age-range trends over time. Betas for risk function for  
20 non-blood pressure risk factors were estimated separately for the risk of incident coronary heart disease events,  
21 incident strokes, and non-CVD deaths, using examinations 1-8 of the Framingham Offspring cohort (24). Risk  
22 factors are assumed to affect the incidence of MI, arrest, and angina in proportion to the overall incidence of  
23 coronary heart disease, except tobacco smokers are assumed to have a higher relative risk for infarction and  
24 arrest (25); and a proportionately lower coefficient for angina. Environmental tobacco exposure is assumed to  
25 carry a relative risk of 1.26 for MI and cardiac arrest compared with non-exposed non-smokers (26) but not to  
26 influence angina. The number of hospitalized MI were obtained from the national STEPS survey (2). Case-  
27 fatality rates and rates of MI in subgroups were estimated from national data and other complementary sources.  
28 Prehospital arrest deaths and out-of-hospital cardiac arrests surviving to hospital discharge were estimated from  
29 our effectiveness study (Supplementary Table 1).  
30  
31  
32  
33  
34  
35  
36  
37  
38  
39

40 Survival after a coronary heart disease event was estimated and calibrated based on national or international data  
41 sources (27, 28). Rates of coronary revascularizations was estimated from the National hospital discharge survey,  
42 with mortalities estimated from aggregated historical data. Stroke incidence was assumed to be independent of the  
43 risk of new-onset coronary heart disease in the same year. The number of hospitalized strokes cases was obtained  
44 from national and regional studies. The annual probabilities of stroke after MI (29, 30) and the probability of  
45 coronary heart disease in stroke patients were based on natural history studies and systematic reviews of blood  
46 pressure control trials (31-36). A 30-day heart failure mortality and re-hospitalization data were from the  
47 THESEUS-HF registry (37) and Korean Acute Heart Failure Registry (KorAHF)(38, 39) (Supplementary Table 2  
48 and 3).  
49  
50  
51  
52  
53  
54  
55  
56  
57  
58  
59  
60

1  
2  
3 The background prevalence of CVD by age, sex, and CVD disease state (stroke, coronary heart disease, or both  
4 stroke and coronary heart disease) in 2020 was estimated from the National Health Survey data (2) and GBD 2017  
5 (40). The background prevalence of prior coronary revascularization was estimated from revascularizations before  
6 2019 and estimated survival after revascularization, while model projections were used to infer the distribution of  
7 revascularization by CVD state. Age and sex-specific health care costs were estimated using national data, and our  
8 effectiveness data. Hospitalized stroke and coronary heart disease costs and acute stroke rehabilitation costs were  
9 estimated using WHO Choice (41) inflated to 2021. Outpatient consultations, and inpatient stay and bed days were  
10 also estimated from WHO choice (41) inflated to 2021. Chronic outpatient CVD costs additional to average  
11 background health care costs for the first year after the event and subsequent years were estimated for patients with  
12 a stroke or coronary heart disease diagnosis was pooled from the 2015 national STEPS survey. Average annual non-  
13 cardiovascular costs were estimated from the national STEPS survey (2), and EDHS 2016 survey (13).

### 21 **2.6.2. Cost estimation**

22 The outcomes measures are total discounted societal costs, cost/year, and cost/patient-year. This is the amount of  
23 health budget that could be saved by effective prevention and control of hypertension. The direct costs were divided  
24 into two subcategories: direct medical costs and direct non-medical costs. Direct medical costs include; inpatient  
25 stays, outpatient clinic visits, medical services, drug acquisition, dispensing, administration, monitoring, laboratory  
26 test, and imaging study costs. The costs associated with outpatient/inpatient visits were estimated by multiplying  
27 the numbers of outpatient visits related to hypertension by the outpatient costs per year (i.e., twelve times WHO  
28 cost per outpatient visit for secondary hospitals inflated to 2021) (41).

29  
30  
31  
32  
33  
34 Data concerning medications prescribed for the management of hypertension, and associated comorbidities, and  
35 laboratory tests and imaging studies were done were collected by patient chart abstraction in index year (2020). The  
36 cost of medications used for management of hypertension and associated comorbidities was taken from Ethiopian  
37 Pharmaceutical supply agency Arba Minch regional hub selling price and retail price of Arba Minch General  
38 Hospital in 2020. The retail price of Arba Minch General Hospital was used because of the minimum distance from  
39 the Pharmaceutical supply agency hub, which could minimize markup added on retail price due to transportation  
40 cost. Costs of laboratory procedures were also taken from Arba Minch Hospital Laboratory's service price list. The  
41 prices of relevant laboratory tests and imaging studies were based on the average price of included Hospitals. The  
42 salary scale of the health workforce was based on the FMOH of Ethiopia (Supplementary Table 4).

43  
44  
45  
46  
47  
48 Ongoing program costs for hypertension care was estimated from WHO tool outputs for CVD and diabetes care  
49 and National strategic action plan (NSAP) for prevention & control of non-communicable diseases in Ethiopia  
50 2014-2016 and adjusted for 2021 inflation target population (42). Adjustment for the study population was done by  
51 multiplying the national cost by the proportion of the study population (i.e., 3%). National and regional cost  
52 estimates were based on the proportion of patients studied (i.e. 3% and 20%). We considered this strategy since the  
53  
54  
55  
56  
57  
58

1  
2  
3 age and sex distribution of hypertension among different regions in the country is did not vary significantly. The  
4 collected cost data added up and averaged by using a bottom-up approach. Facility-based or reference costs were  
5 used during computing costs. The total medical cost of hypertension treatment was calculated as the sum of the  
6 product of medical costs with their respective unit prices. Costs were discounted at an annual rate of 3% and  
7 reported in 2021 USD (43, 44).

8  
9  
10  
11 Direct non-medical costs include transportation costs and patient time costs due to care. The cost of patient time  
12 due to care was estimated by using the average daily wage of patients which was calculated from average monthly  
13 income (97.00 ETB) 34,931.00 annual income from our treatment effectiveness survey. Transportation cost was  
14 determined by using the cost of average traveling distance and local transportation tariff (42.00 ETB) in January  
15 2021. According to EDHS 2016 survey showed that 33% of women and 88% of men are currently employed (13).  
16 This proportion was used to determine the patient time cost due to care for employed groups. For the unemployed  
17 proportion, the average daily wage of daily laborers workers working 8 hours per day for 6 days per week was used  
18 (26.53 ETB) from the monthly wage of 796.00 ETB (420-1172 ETB) (45).

19  
20  
21 Indirect costs include cost hospitalization, productivity loss due to illness, and cost of death. Cost-of hypertension-  
22 related hospitalization was taken from WHO Choice (41), costs per inpatient stay and cost per inpatient bed day  
23 times duration of hospitalization inflated for 2021, and professional time (physician, nurse laboratory professional,  
24 and pharmacist time). If a patient had multiple admissions during the year, the costs for each admission were  
25 aggregated as the total costs (46).

### 26 27 28 **2.6.3. Mortality and morbidity estimations**

29  
30  
31 Age and sex-specific mortality rates among the adult general population in Ethiopia were taken from EDHS 2016  
32 survey and extrapolated to selected populations (13). According to EDHS 2016, the probability of dying before age  
33 50 years among adults  $\geq 15$  years were 10% and 12%, in women and men respectively (13). Due to the absence of  
34 mortality data specific to hypertension treatment and control status in Ethiopia, mortality risk in the general  
35 population was attributed to those with and without hypertension using sex-specific estimates of the relative risk  
36 (RR) of all-cause mortality associated with hypertension by treatment and control status was derived from a study  
37 conducted in India was used (47). A cohort study conducted in India among adults 20 years and above to determine  
38 the Rate and Risk of all-cause mortality among people with HTN showed that the incidence of deaths in the study  
39 was 4.28% during the follow-up period of 6 years. The relative risk of mortality was 3.13 (CI: 2.91-3.37) and 1.2 in  
40 the high BP group and at age of 60 years. The age-adjusted hazard ratio of all-cause mortality for the high BP group  
41 was 2.96 (2.56-3.42) (47) (Supplementary Tables 5 and 6).

42  
43  
44 In 2020 crude death rate of the Ethiopian population-based on global estimates was 6.29 deaths per 1000  
45 population (48). The estimated prevalence of hypertension among adults was calculated from National STEPS  
46 Survey 2016, systematic review and meta-analysis, and WHO report and local studies and the mean estimated  
47  
48  
49  
50  
51

prevalence of hypertension was 21.39% (2, 13, 47, 49-52). Only 28.4% of patients with hypertension are taking antihypertensive medication (2). The mean relative risk of all-cause mortality among hypertensive population when compared to those without hypertension was 1.39 (0.95 to 1.95) (53) (Supplementary Table 3).

Years of life lost due to hypertension morbidity was determined by first calculating disability weights for specific ages based on blood pressure control status (X). Then subtract this value (X) from the life expectancy of the Ethiopian population (i.e., 66.7 years for men, and 70.4 years for women) (Y). The productivity loss cost due to hypertension morbidity was calculated by multiplying Y with sex-specific employment rate based on a monthly average income of 2059.078 ETB from the National STEPS survey 2015 adjusted for 2021 inflation (13,13/9.57=1.372) STEPS Survey, 2015 (2). The EDHS 2016 survey showed that 33% of women and 88% of men are currently employed (13) and for unemployed, 2019 minimum average monthly earnings (ETB) of daily laborers reported by the MOLSA 796 ETB (420-1172 ETB) (45). Concerning, cost of productivity lost due to premature mortality: first we calculated potential years of life lost (YLL) by subtracting life expectancy from sex-specific age of death at which the death is recorded (Z). Then Z is multiplied by the number of deaths in each age group (Xi). Finally, we multiplied Xi with sex-specific employment rates like productivity loss due to hypertension-related morbidity above (54). Excess mortality and morbidity due to hypertension to hypertension were determined by subtracting age and sex-specific morbidity and mortality among the general population from the hypertensive cohort. Both were determined by using age, sex, and blood pressure treatment status mortality rate per 1000 person-years (Supplementary Table 6).

#### 2.6.4 Morbidity adjustment

Patients with hypertension may have more than one disease, the addition of YLDs across causes may result in overestimation of the total loss of health (55). Therefore, it is recommended to estimate comorbidities using the assumption of independence within age-sex groups (56):

$$P_{1+2} = P_1 + P_2 - (P_1 \times P_2) = 1 - (1 - P_1) \times (1 - P_2)$$

- Where  $P_{1+2}$  is the prevalence of the two comorbid diseases 1 and 2,
- $P_1$  is the prevalence of disease 1 and  $P_2$  is the prevalence of disease 2.

The combined disability weight for individuals with multiple conditions is estimated assuming a multiplicative model as follows:

$$DW_{1+2} = 1 - (1 - DW_1) \times (1 - DW_2)$$

Since prevalence YLDs are calculated for each cause as:

$$YLD_i = DW_i \times P_i$$

- two preceding equations can be combined into a single calculation resulting in:

$$YLD_{1+2} = 1 - (1 - YLD_1) \times (1 - YLD_2)$$

### 2.6.5 Assumptions and Transition probabilities

The counterfactual comparator (hypothetical cohort of normotensive individuals) with a probability of developing CVD events among the general population. Both in case and comparator cohorts, the probability of non-CV death does not depend on the health state and is similar for both hypertensive and normotensive populations (57) and we chose not to model differential use of antihypertensive medication classes in order not to bias cost-of-treatment. Antihypertensive dose intensification and frequency of BP monitoring were based on ISH 2020 guidelines for blood pressure control. We did not simulate the effects of any particular medication; instead, we simulated “standard dose” effects and assumed average drug prices across classes (58). The amount of blood pressure change was assumed to be a function of the baseline BP and the effect of a standard-dose antihypertensive agent at that pre-treatment level (59). We also assumed the medication adherence rate as 75% based on clinical trials (59). Other important assumptions include cost of illness due to hypertension or associated morbidities were calculated based on the monthly earnings during data collection; all costs incurred before one year were adjusted/accounted to today’s value (2021 USD equivalent) and discounted at 3%; years of life lost and years of life lived with disability (YLDs) were not discounted as per the recent WHO recommendations.

### 2.7. Data Quality control, Processing, and Analysis

Questionnaires are prepared in English and the patient interview part of the questionnaire was translated into Amharic and translated back into English to check its consistency. The Amharic version of the patient interview questionnaire and English version of the health professional interview, data abstraction form, and health system interview questionnaires was used for data collection. The questionnaire was pretested on 30 adult hypertensive patients in Arba Minch General Hospital to ensure that the respondents could understand the questions and to check for consistency and possible amendments were made based on findings. Six professional nurses (BSc.) for data collection and one senior professional working in the respective health facilities for supervision were oriented before data collection about data collection approaches and contents of data collection format for one day by the principal investigator. Continuous follow-up and supervision were made by the principal investigator throughout the data collection period. The collected data were checked for completeness and consistency by the principal investigator on daily basis at the spot during the data collection time. Then data were transcribed back to English for the patient interview part and entry was made using Epi-data 3.1 software. After data processing, analysis was done by using SPSS version 21.0 and Microsoft excel 2010. A summary of descriptive statistics was reported for socio-demographic factors; cost of hypertension and life years lost due to hypertension related morbidity and premature mortality and presented in tables and figures.

## 2.8. Patient and Public involvement

There was no identifiable patient involvement in this research. Patients' demographic characteristics and disease related variables were obtained by using questionnaire based interview after obtaining verbal consent from the patient. No patient identifier information was collected. Finally, most of variables were taken from published national and international literatures, and all relevant sources were acknowledged through citation.

## 2.9. Statements

### Ethics approval and consent to participate

The study was approved by Tehran University of medical sciences, Faculty of pharmacy, department of pharmacoconomics, and pharmaceutical administration ethical review board with Approval ID: *IR.TUMS.MEDICINE.REC.1399.674* and Arba Minch University College of medicine and health sciences Institutional review board with Reference number: *IRB/T10/2012*. After clarifying the study objective and confidentiality of the information; verbal informed consent was obtained from each respective hospital before data collection.

### Consent for publication

All authors read the full version of this manuscript and agreed to publish

### Availability of data and materials

All the data reported in the manuscript are publicly available up on official request of principal investigator upon acceptance of the manuscript

### Competing interests

The authors declare that they have no competing interests.

### Funding

There is no funding source for the study.

### Authors' contributions

All Authors read and approved the manuscript. *MM* conceived the research, framed the format design and developed the manuscript for publication; *MD* participated in data analysis and reviewed the manuscript and *AK* reviewed the manuscript and write-up process; *NS* and *TS* participated in literature review and polished the language of the manuscript.



### 3. Results

#### 3.1. Description of study participants

In this study, we estimated the regional and national economic burden of hypertension (direct and indirect costs) by using the cardiovascular disease policy model adapted to the Sub-Saharan Africa perspective (60) (Supplementary Figure 1). Total costs of treated hypertension and hypertension-related excess mortality and years of life lost due to hypertension were determined. We followed a cohort of 406 hypertensive patients retrospectively for 10 years from September 2003 to 2013 Ethiopian calendar (September 2010-2020) for baseline assessment and simulated the cost of hypertension for lifelong from a societal perspective. About two-thirds, 250 (61.6%) of patients were females with a mean age of  $55.87 \pm 11.03$  years. Less than 1 in five 75 (18.5%) of patients achieved their BP control target based on international society of hypertension 2020 guidelines (Table 1).

**Table 1:** Patient characteristics and Disease related factors among adult hypertensive patients on regular follow-up at selected public hospitals in Southern Ethiopia, January 2021 (n=406)

| Sociodemographic factors                 |                                 | Frequency   |
|------------------------------------------|---------------------------------|-------------|
| Sex                                      | Male                            | 156 (38.4%) |
|                                          | Female                          | 250 (61.6%) |
| Age in in years                          | Below 40 years                  | 15 (3.7%)   |
|                                          | 40- 65 years                    | 286 (70.4%) |
|                                          | 65 years and above              | 105 (25.9%) |
| Religion                                 | Orthodox                        | 215 (53.0%) |
|                                          | Muslim                          | 37 (9.1%)   |
|                                          | Protestant                      | 144 (35.5%) |
|                                          | Catholic                        | 10 (2.5%)   |
| Annual gross income before tax (n=406)   | Less than 12,000                | 117 (28.8%) |
|                                          | 12,000- 18,000                  | 89 (21.9%)  |
|                                          | 18,000- 23,000                  | 200 (49.2%) |
| Level of Education                       | Illiterate                      | 259 (63.8%) |
|                                          | Grades 1-8                      | 46 (11.3%)  |
|                                          | Grades 9-12                     | 22 (5.4%)   |
|                                          | College and above               | 73 (18.0%)  |
|                                          | Post-graduate degree            | 6 (1.5%)    |
| Occupation                               | Employed                        | 65 (16.0%)  |
|                                          | Merchant                        | 63 (15.5%)  |
|                                          | Farmer                          | 79 (19.5%)  |
|                                          | House wife                      | 149 (36.7%) |
| <b>Disease related factors</b>           |                                 |             |
| Duration of hypertension since diagnosis | 5 - 9 years                     | 262 (64.5%) |
|                                          | 10 - 14 years                   | 131 (32.3%) |
|                                          | 15 and above years              | 13 (3.2%)   |
| Family history of CVDs                   | 1 <sup>st</sup> degree relative | 133 (32.7%) |
|                                          | Second degree relative          | 16 (3.9%)   |
|                                          | None                            | 257 (63.3%) |
| Presence of comorbidities (n=406)        | Yes                             | 310 (76.4%) |
|                                          | No                              | 96 (23.6%)  |
| History of hospitalization               | Yes                             | 250 (61.6%) |



|                                                |                                 |             |
|------------------------------------------------|---------------------------------|-------------|
|                                                | No                              | 156 (38.4%) |
| Duration of hospitalization (n=250)            | Below 5 days                    | 56 (22.4%)  |
|                                                | 5 to 10 days                    | 112 (44.8%) |
|                                                | More than 10 days               | 82 (32.8%)  |
| Target BP achieved based on ISH 2020 guideline | Yes                             | 75 (18.5%)  |
|                                                | No                              | 331 (81.5%) |
| Antihypertensive regimen                       | Monotherapy                     | 136 (33.5%) |
|                                                | Two drug combination            | 234 (57.6%) |
|                                                | Three and more drug combination | 36 (8.8%)   |

## 3.2. Cost of hypertension

### 3.2.1 Direct (medical and non-medical) costs

Direct medical costs include program costs, cost of drugs for hypertension and comorbidities, laboratory costs, hospitalization costs, annual outpatient visit costs, and costs of medical supplies. A total of \$US 64,837.48 direct cost was incurred due to hypertension. Out of this, 80.0% (\$US 51,915.40) was direct medical cost. From direct medical costs, annual outpatient visit cost 33.55% (\$US 17,419.73), cost of comorbidity 26.21% (\$13,612.15 USD), and laboratory test costs 8.17% (\$US 4,263.29) took the largest share. While, total direct non-medical costs of hypertension was \$US 9,866.58 (i.e. transportation costs and patient time costs due to care). The regional and national annual estimated direct cost of hypertension were \$US 324,187.40 and \$US 2,161,249.33 respectively (Table 2).

**Table 2:** Direct annual costs of treating hypertension among adults in Southern Ethiopia, January 2021 (n=406)

| Cost category                                                | Annual total in ETB<br>Total (mean ± Standard<br>deviation) | Annual cost<br>in July 2021<br>USD | Percentage<br>from total<br>direct cost |
|--------------------------------------------------------------|-------------------------------------------------------------|------------------------------------|-----------------------------------------|
| <b>Direct medical total</b>                                  | <b>2,258,319.97</b>                                         | 51,915.40                          | 80.0%                                   |
| Program costs                                                | 403,275.70 (993.0 ± 0.00)                                   | 9,173.40                           |                                         |
| Cost of antihypertensives                                    | 119,847.64 (295.19 ± 107.78)                                | 2,726.20                           |                                         |
| Cost of drugs for comorbidity                                | 598,409.00 (2266.7 ± 1114.52)                               | 13,612.15                          |                                         |
| Cost for hospitalization                                     | 179,377.03 (3360.76 ± 1594.69)                              | 4,080.33                           |                                         |
| Laboratory tests                                             | 187,420.00 (461.63 ± 226.98)                                | 4,263.29                           |                                         |
| Annual outpatient visit costs                                | 765,795.60 (1886.20 ± 0.00)                                 | 17,419.73                          |                                         |
| Cost of medical supplies                                     | 4,195.00 (85.60 ± 0.00)                                     | 95.42                              |                                         |
| <b>Professional time total</b>                               | <b>128,362.01</b>                                           | 2,950.85                           | 4.6%                                    |
| Physician time                                               | 92,032.08 (226.68 ± 0.00)                                   | 2,093.47                           |                                         |
| Nurse time                                                   | 2,060.28 (43.84 ± 17.81)                                    | 46.87                              |                                         |
| Pharmacy time                                                | 4,453.01 (10.97 + 0.00)                                     | 101.29                             |                                         |
| Laboratory time                                              | 29,816.64 (73.44 ± 0.00)                                    | 678.25                             |                                         |
| <b>Direct non-medical costs</b>                              | <b>433,748.59 (1068.84 ± 384.78)</b>                        | 9,866.58                           | <b>15.37%</b>                           |
| Total direct cost of treated hypertension                    | 2,820,430.57                                                | 64,837.48                          | 100.00%                                 |
| 1USD= 43.9614 ETB on July 13, 2021                           |                                                             |                                    |                                         |
| <b>ETB:</b> Ethiopian Birr; <b>USD:</b> United States Dollar |                                                             |                                    |                                         |

### 3.2.2. Life years lost due to premature mortality and morbidity

We determined the years of life lost due to premature mortality (excess mortality) and years of life lost due to hypertension morbidity for the productive age population (30-64 years) among a cohort of simulated adult hypertensive patients. Excess mortalities are all-cause deaths observed in those with hypertension compared to the same cohort assuming no hypertension. The excess mortality and years of life lost were different among the hypertensive cohort and simulated population with no hypertension. A total of 11,858 (6,159, men; 5,699 women) life years were lost due to hypertension-related premature mortality among 30-64 years old adults with hypertension. This equates \$US 428,969.78 (\$US 270,076.91, men; \$US 158,892.78). The estimated regional and national life years lost due to premature mortality was 59,290 and 395,267 respectively. This is equivalent to \$US 2,144,848.58 and \$US 14,298,990.51 respectively. From 15,232 years lost due to premature mortality in the hypertension cohort, treated and uncontrolled hypertension accounted for more than 6,824 (44.8%) total years lost due to premature mortality followed by treated controlled hypertension 5,832 (38.29%) and untreated hypertension 2,575 (16.9%) (Table 3 and 4).

**Table 3:** Excess deaths among adult hypertensive by treatment and control status over the working lifetime simulated from life table modelling in Southern Ethiopia January 2021

| Age group                                                                                                                     | Deaths in hypertension cohort | Deaths in 'hypertension cohort' assuming no hypertension | Excess deaths in those with hypertension | Deaths in those with to hypertension by treatment and control status * |                          |           |
|-------------------------------------------------------------------------------------------------------------------------------|-------------------------------|----------------------------------------------------------|------------------------------------------|------------------------------------------------------------------------|--------------------------|-----------|
|                                                                                                                               |                               |                                                          |                                          | Treated and controlled                                                 | Treated and uncontrolled | Untreated |
| <b>Men</b>                                                                                                                    |                               |                                                          |                                          |                                                                        |                          |           |
| 30-34                                                                                                                         | 1,436                         | 448                                                      | 988                                      | 487                                                                    | 654                      | 295       |
| 35-39                                                                                                                         | 1,180                         | 381                                                      | 799                                      | 401                                                                    | 537                      | 242       |
| 40-44                                                                                                                         | 1,027                         | 428                                                      | 599                                      | 357                                                                    | 479                      | 191       |
| 45-49                                                                                                                         | 1,735                         | 224                                                      | 1,511                                    | 1,167                                                                  | 405                      | 163       |
| 50-54                                                                                                                         | 989                           | 166                                                      | 823                                      | 370                                                                    | 496                      | 123       |
| 55-59                                                                                                                         | 731                           | 123                                                      | 608                                      | 273                                                                    | 367                      | 91        |
| 60-64                                                                                                                         | 932                           | 101                                                      | 831                                      | 362                                                                    | 443                      | 127       |
| Total                                                                                                                         | 8,030                         | 1,871                                                    | 6,159                                    | 3,417                                                                  | 3,381                    | 1,232     |
| <b>Women</b>                                                                                                                  |                               |                                                          |                                          |                                                                        |                          |           |
| 30-34                                                                                                                         | 1,401                         | 415                                                      | 986                                      | 434                                                                    | 657                      | 310       |
| 35-39                                                                                                                         | 1,187                         | 212                                                      | 975                                      | 368                                                                    | 556                      | 263       |
| 40-44                                                                                                                         | 1,019                         | 287                                                      | 732                                      | 324                                                                    | 490                      | 205       |
| 45-49                                                                                                                         | 832                           | 279                                                      | 553                                      | 265                                                                    | 400                      | 167       |
| 50-54                                                                                                                         | 887                           | 91                                                       | 796                                      | 350                                                                    | 400                      | 137       |
| 55-59                                                                                                                         | 805                           | 72                                                       | 733                                      | 277                                                                    | 419                      | 109       |
| 60-64                                                                                                                         | 1,071                         | 147                                                      | 924                                      | 396                                                                    | 521                      | 154       |
| Total                                                                                                                         | 7,202                         | 1,503                                                    | 5,699                                    | 2,414                                                                  | 3,443                    | 1,345     |
| <b>Box sex total</b>                                                                                                          | 15,232                        | 3,374                                                    | 11,858                                   | 5,831                                                                  | 6,824                    | 2,577     |
| * Excess deaths are all-cause deaths observed in those with hypertension compared to the same cohort assuming no hypertension |                               |                                                          |                                          |                                                                        |                          |           |

**Table 4:** Years of life lost (YLL) by adults with hypertension by treatment and control status over the lifetime simulated from life table modelling in Southern Ethiopia, January 2021

| Age group    | Years of life lived in treated hypertension cohort | Years of life lived in 'hypertension cohort' assuming no hypertension | YLL lost to Treated hypertension (excess) | YLL lost due to hypertension by treatment and control status * |                          | Years of life lived in untreated hypertension cohort | YLL lost due to Untreated hypertension |
|--------------|----------------------------------------------------|-----------------------------------------------------------------------|-------------------------------------------|----------------------------------------------------------------|--------------------------|------------------------------------------------------|----------------------------------------|
|              |                                                    |                                                                       |                                           | Treated and controlled                                         | Treated and uncontrolled |                                                      |                                        |
| <b>Men</b>   |                                                    |                                                                       |                                           |                                                                |                          |                                                      |                                        |
| 33-39        | 199.87                                             | 181.2                                                                 | 18.67                                     | 141.34                                                         | NA                       | 122.67                                               | 58.53                                  |
| 40-44        | 357.48                                             | 324.1                                                                 | 33.38                                     | 235.09                                                         | 17.71                    | 219.42                                               | 104.68                                 |
| 45-49        | 587.08                                             | 522.5                                                                 | 64.58                                     | NA                                                             | 418.31                   | 353.73                                               | 168.77                                 |
| 50-54        | 341.9                                              | 295.3                                                                 | 46.6                                      | NA                                                             | 246.52                   | 199.92                                               | 95.38                                  |
| 55-59        | 161.63                                             | 140.1                                                                 | 21.53                                     | NA                                                             | 116.38                   | 94.85                                                | 45.25                                  |
| 60-64        | 129.88                                             | 109.4                                                                 | 20.48                                     | NA                                                             | 94.54                    | 74.06                                                | 35.34                                  |
| Total        | 1777.84                                            | 1572.6                                                                | 205.24                                    | 376.43                                                         | 893.46                   | 1,064.65                                             | 507.95                                 |
| <b>Women</b> |                                                    |                                                                       |                                           |                                                                |                          |                                                      |                                        |
| 33-39        | 318.33                                             | 288.6                                                                 | 29.73                                     | 225.11                                                         | NA                       | 195.38                                               | 93.22                                  |
| 40-44        | 791.95                                             | 718                                                                   | 73.95                                     | 560.04                                                         | NA                       | 486.09                                               | 231.91                                 |
| 45-49        | 1147.34                                            | 1040.2                                                                | 107.14                                    | NA                                                             | 811.36                   | 704.22                                               | 335.98                                 |
| 50-54        | 953.59                                             | 863.8                                                                 | 89.79                                     | NA                                                             | 674.58                   | 674.58                                               | 279.01                                 |
| 55-59        | 491.71                                             | 445.8                                                                 | 45.91                                     | NA                                                             | 347.72                   | 309.52                                               | 143.99                                 |
| 60-64        | 297.81                                             | 270                                                                   | 27.81                                     | NA                                                             | 210.6                    | 182.79                                               | 87.21                                  |
| Total        | 4,000.73                                           | 3626.4                                                                | 374.33                                    | 785.15                                                         | 2,044.26                 | 1,878.00                                             | 1,171.33                               |
| Grand total  | 5,778.57                                           | 5199                                                                  | 579.57                                    | 1161.58                                                        | 2,937.72                 | 2,942.65                                             | 1,679.28                               |

NA= No patient is reported in this age group; \* YLL=years of life lost by those with hypertension compared to the same cohort assuming no hypertension.

A total of 579.57 (205.24 men; 374.33 women) years of life were lost due to hypertension morbidity. This equates to \$US 19,436.56. A total of 11,858 (6,159 men; 5,699 women) years of life were lost due to hypertension related premature mortality. This equates to \$US \$429,958.12. Total productivity loss due to premature mortality and morbidity was \$US 449,394.68 (Table 5). Treated and uncontrolled hypertension accounted for 2,937.72 (50.84%) of productive life years lost, followed by untreated hypertension 1,679.28 (29.06%). Treated uncontrolled hypertension contributed to more YLL due to premature mortality in both sexes 6,824 (44.8%), and life years lost due to hypertension morbidity 2, 9378 (50.84%) (Figure 2).

The overall estimated hypertension related economic burden (direct and indirect cost) was \$US 514,232.16 in the study area (Table 2 and Table 5). Since the study population is estimated to be 20% of the Southern region, the estimated economic burden of hypertension in the region is \$US 2,571,160.8 in the region. More than eight out of ten 87.37% dollars were due productivity loss. Productivity loss is calculated by taking 88% employment rate for men, 33% employment rate for women. Monthly wage of employed 2059.078 from EDHS 2016 and National STEPS survey 2015 which is adjusted for current inflation (1.3689). Unemployment/unpaid monthly wage of 796 ETB (Table 5).

**Table 5:** Mean annual productivity loss associated premature mortality and hypertension morbidity, Southern Ethiopia, January, 2021

| Variable                                 | Sex    | Excess Years lost | Lost productivity ETB | Lost productivity in 2021 USD |
|------------------------------------------|--------|-------------------|-----------------------|-------------------------------|
| Years lost due to premature mortality    | Male   | 6,159             | 11,748,345.71         | \$270,699.21                  |
|                                          | Female | 5,699             | 6,911,836.90          | \$159,258.91                  |
|                                          | Both   | 11,858            | 18,660,182.62         | \$429,958.12                  |
| Years lost due to hypertension morbidity | Male   | 205.24            | 391,497.07            | \$8,999.93                    |
|                                          | Female | 374.33            | 453,993.32            | \$10,436.63                   |
|                                          | Both   | 579.57            | 845,490.39            | \$19,436.56                   |
| Total productivity loss                  |        |                   | 19,505,673.01         | \$449,394.69                  |
| 1USD=43.5 ETB                            |        |                   |                       |                               |

**Note:** productivity loss is calculated by taking 88% employment rate for men, 33% employment rate for women. Monthly wage of employed 2059.078 from EDHS 2016 and National STEPS survey 2015 which is adjusted for current inflation (1.3689). Unemployment/unpaid monthly wage of 796 ETB

#### 4. Discussion

In this prevalence-based retrospective cost of illness study, we estimated the economic burden of hypertension among productive age population from societal perspective. A total direct (medical and non-medical) annual cost incurred due to hypertension in the study population was \$US 64,837.48 (\$US 13.308 per person per month). Out of direct costs, 80.0% (\$US 51,915.40) was direct medical cost. While, the total indirect annual cost incurred due to hypertension was \$US 449,394.69 (\$US 92.24 per person per month). The total annual economic burden of hypertension was \$US 514,232.16 (\$ US 105.55 per person per month). This is higher than findings from another institution-based cross-sectional study conducted to evaluate cost of hypertension illness among patients attending hospitals in Southwest Shewa Zone that showed the mean monthly total cost of hypertension illness was US\$ 22.3 (95% CI, 21.3–23.3) (61). Findings from an institution-based cross-sectional study conducted to estimate the direct and indirect costs of hypertension at Gondar Specialized Hospital showed that total cost of hypertension was \$91.72 ± 78.65 per patient per year (62). The COI study conducted among 202 hypertensive patients in Ghana that showed the total annual treatment cost of hypertension was \$US 76,275.60 (\$US31.47 per person per month) (63). However, this is less than findings from and a study conducted in Canada also showed that annual individual healthcare cost of hypertension was \$ US 2,341 (64), and study conducted in the USA showed that individuals with hypertension had \$ US 1,920 higher annual incremental expenditure (65). This variation could be explained by variation in socioeconomic status and population health status, and our findings could underestimate both costs and health-related life loss due to the asymptomatic nature of hypertension (66), a significant number of undiagnosed hypertension among adults, and difference in health care system and level of care.

1  
2  
3 In this study, indirect cost accounted for more than three fourth of hypertension-related costs 85.6%  
4 (\$449,394.69 USD). This is against evidence generated by a cross-sectional study conducted to determine the  
5 burden of out-of-pocket payments among patients with cardiovascular disease in public and private hospitals  
6 in Ibadan, South West, Nigeria showed that across all the hospital facilities, the annual direct and indirect  
7 outpatient costs were \$1164.2± \$2363.8 and \$52.87±\$148.05 respectively (67). An institution-based cross-  
8 sectional study conducted to estimate the direct and indirect costs of hypertension at Gondar Specialized  
9 Hospital showed that the direct medical and non-medical cost constituted 60.81% and 12.17% of the total  
10 cost of hypertension respectively (62). An institution-based cross-sectional study conducted to evaluate cost  
11 of hypertension illness among Patients Attending Hospitals in Southwest Shewa Zone showed that the mean  
12 monthly total cost of hypertension illness was US\$ 22.3 (direct cost of US\$ 11.39 and indirect cost US\$ 10.89)  
13 (61). This is also higher than evidence that suggested about a half of the costs associated with CVD burden are  
14 caused by direct healthcare costs (68). The findings from a study conducted in Ghana direct cost accounting  
15 for almost 70% of the total cost of managing hypertension (63). Similarly, a study conducted in rural Yunnan  
16 Province of China showed that direct costs represented the largest component of the economic cost of  
17 hypertension (69). The variation could be explained by significant number of productive age populations  
18 affected hypertension in the study area and poor blood pressure control. Therefore, it is important to promote  
19 existing strategies and develop country/region-specific strategies for hypertension prevention and control (i.e.,  
20 annual screening of the high-risk population and promoting healthy lifestyles) by all stakeholders could reduce  
21 the economic burden of hypertension Ethiopia (70, 71).

22  
23  
24  
25  
26  
27  
28  
29  
30  
31  
32  
33 Concerning pre-mature mortality, a total of 11,858 (6,159, men; 5,699 women) years were lost due to  
34 hypertension-related premature mortality. This equates \$US 429,958.12. Concerning health-related life loss,  
35 about 26,678 deaths per study population were due to hypertension. This is higher than the number of  
36 hypertension-related death occurred in 2017, which as 11,050 (7). This could be explained by the increasing  
37 trend of hypertension in the country.

38  
39  
40  
41  
42 From 15,232 years lost due to premature death in the hypertension cohort. More than two-third of related  
43 deaths, 12,656 (83.08%) were due to treated hypertension. Treated and uncontrolled hypertension contributed  
44 to premature mortality 6,824 (44.8%), and life years lost due to hypertension morbidity 2, 9378(50.84%) in both  
45 sexes. This is supported by evidence from other studies that revealed uncontrolled blood pressure cost \$370  
46 billion globally in 2001 (72). This is because the relative risk of all-cause mortality is higher among treated and  
47 uncontrolled (1.62) than untreated (1.40) and treated controlled (1.12) patients (53).

48  
49  
50  
51  
52 Untreated hypertension accounted for 1,679.28 (507.95 men, 1171.33 women) years of life lost. Treated and  
53 uncontrolled hypertension accounted for one-half 2,937.72 (50.84%) of productive life years lost. This is higher  
54 than findings from a study conducted to estimate the economic burden of hypertension in a given year in rural  
55

1  
2  
3 Yunnan Province of China showed that the overall prevalence of and YLL/1000 population because of  
4 hypertension was 24.8% and 1.5 years for the survey population, respectively (69). A total of 579.57 (205.24  
5 men; 374.33 women) years of life were lost due to hypertension. The estimated national life years lost due to  
6 hypertension is 19,319 (i.e., \$846,413.56 USD). This is supported by evidence from a study conducted Australia  
7 that revealed hypertension caused 609,801 productivity-adjusted life years loss (equating to AUD\$ 137.2  
8 billion) over the working lifetime (73). Therefore, prevention of hypertension and improving the rate of blood  
9 pressure control is important to reduce hypertension-related complications and productive life-year loss in the  
10 region as well as in the country (74).  
11  
12  
13  
14  
15

## 16 **5. Conclusion**

17  
18 The societal economic burden of hypertension in Southern Ethiopia was substantial. Indirect costs accounted  
19 for more than eight out of 10 dollars economic burden. Prevention of hypertension could result in \$US  
20 2,571,160.8 annual economic savings in the Southern Region. Therefore, designing and implanting strategies  
21 for prevention of hypertension, early screening, and detection, and improving the rate of blood pressure control  
22 by involving all relevant stakeholders at all levels (national, regional, zonal, community, and patient-level) is  
23 critical to saving scarce health resources.  
24  
25  
26  
27  
28  
29  
30  
31  
32  
33  
34  
35  
36  
37  
38  
39  
40  
41  
42  
43  
44  
45  
46  
47  
48  
49  
50  
51  
52  
53  
54  
55  
56  
57  
58  
59  
60

## 6. Abbreviations

**BP:** Blood Pressure

**CPG:** Clinical Practice Guideline

**CVD:** Cardiovascular Diseases

**DALY:** Disability Adjusted Life Years

**DBP:** Diastolic Blood Pressure

**EDHS:** Ethiopia Demographic Health Survey

**HDL:** High-Density Lipoprotein

**ICER:** Incremental Cost-Effectiveness Analysis

**LDL:** Low-Density Lipoprotein

**LMICs:** Low- and Middle-income Countries

**MI:** Myocardial Infarction

**QALY:** Quality Adjusted Life Years

**SBP:** Systolic Blood Pressure

**VLDL:** Very Low-Density Lipoprotein

**WHO:** World Health Organization

**YLD:** Years Lived with Disability

**YLL:** Years of Life Lost



## 7. References

1. Whelton PK CR, Aronow WS, Casey DE Jr, Collins KJ, Dennison Himmelfarb C, DePalma SM, Gidding S, Jamerson KA, Jones DW, MacLaughlin EJ, Muntner P, Ovbigele B, Smith SC Jr, Spencer CC, Stafford RS, Taler SJ, Thomas RJ, Williams KA Sr, Williamson JD, Wright JT Jr. 2017 ACC/AHA/AAPA/ABC/ACPM/AGS/APhA/ASH/ASPC/NMA/PCNA guideline for the prevention, detection, evaluation, and management of high blood pressure in adults: a report of the American College of Cardiology/American Heart Association Task Force on Clinical Practice Guidelines. *Hypertension* (Dallas, Tex : 1979). 2018;71:e13-e115.
2. Institute. EPH. Ethiopia steps report on risk factors for chronic non-communicable diseases and prevalence of selected NCDs. 2016.
3. Thomas Unger, Claudio Borghi, Fadi Charchar, Nadia A. Khan, Neil R. Poulter, Dorairaj Prabhakaran, et al. 2020 International Society of Hypertension Global Hypertension Practice Guidelines. *Hypertension*. 2020;75(00):1-25.
4. O'Donnell MJ, Xavier D, Liu L, Zhang H, Chin SL, Rao-Melacini P, et al. Risk factors for Ischemic heart disease and Intracerebral Haemorrhagic stroke in 22 countries (the UNTERSTROKE study): a case-control study. *The Lancet*. 2010;376(9735):112-23.
5. Organization WH. A heavy burden: the productivity cost of illness in Africa. 2019.
6. Region WSEA. Special Issue on Blood Pressure-take control. India2013 World Health Day.
7. WHO. Health profile: Ethiopia. World Health Rankings: [Internet]. 2017. Available from: <https://www.worldlifeexpectancy.com/country-health-profile/ethiopia>.
8. Tarricone R. Cost-of-illness analysis: what room in health economics? *Health policy*. 2006;77(1):51-63.
9. Lesyuk W, Kriza C, Kolominsky-Rabas P. Cost-of-illness studies in heart failure: a systematic review 2004–2016. *BMC Cardiovascular Disorders*. 2018;18(1):74.
10. Menzin J, Marton JP, Menzin JA, Willke RJ, Woodward RM, Federico V. Lost productivity due to premature mortality in developed and emerging countries: an application to smoking cessation. *BMC medical research methodology*. 2012;12(1):87.
11. Liu J, Maniadakis N, Gray A, Rayner M. The economic burden of coronary heart disease in the UK. *Heart*. 2002;88(6):597-603.
12. Organization WH. WHO guide to identifying the economic consequences of disease and injury. 2009.
13. ICF C. Ethiopia Demographic and Health Survey 2016, Addis Ababa, Ethiopia, and Rockville, Maryland, USA: CSA and ICF. DF-1.6.
14. Massimo Volpe CS. Natural History of Treated and Untreated Hypertension. In: Berbari A., Mancia G. (eds) *Disorders of Blood Pressure Regulation. Updates in Hypertension and Cardiovascular Protection*. Springer, Cham: Springer, Cham; 2018.
15. Desa U. World population prospects 2019: Highlights. New York (US): United Nations Department for Economic and Social Affairs. 2019.
16. Norheim OF, Baltussen R, Johri M, Chisholm D, Nord E, Brock D, et al. Guidance on priority setting in health care (GPS-Health): the inclusion of equity criteria not captured by cost-effectiveness analysis. *Cost Eff Resour Alloc*. 2014;12:18-.
17. World Health Organization. It's time to walk the talk: WHO independent high-level commission on noncommunicable diseases final report. Geneva: World Health Organization; 2019. Licence: CC BY-NC-SA 3.0 IGO. 2019.
18. Ruhil R. The Changing Wealth of Nations 2018. Building a Sustainable Future. By Glenn-Marie Lange, Quentin Wodon and Kevin Carey; Washington DC: World Bank Group.© World Bank. IASSI-Quarterly. 2018;37(1):135-7.
19. Turin TC, Okamura T, Afzal AR, Rumana N, Watanabe M, Higashiyama A, et al. Hypertension and lifetime risk of stroke. *Journal of hypertension*. 2016;34(1):116-22.
20. Beyhaghi H, Viera A. Comparative Cost-Effectiveness of Clinic, Home, or Ambulatory Blood Pressure Measurement for Hypertension Diagnosis in US Adults: A Modeling Study. *Hypertension*. 2019;73(1):121-31.

21. Law M, Morris J, Wald N. Use of blood pressure lowering drugs in the prevention of cardiovascular disease: meta-analysis of 147 randomised trials in the context of expectations from prospective epidemiological studies. *Bmj*. 2009;338:b1665.
22. Kaptoge S, Pennells L, De Bacquer D, Cooney MT, Kavousi M, Stevens G, et al. World Health Organization cardiovascular disease risk charts: revised models to estimate risk in 21 global regions. *The Lancet Global Health*. 2019;7(10):e1332-e45.
23. Dawber TR. *The Framingham Study: the epidemiology of atherosclerotic disease*. Cambridge, MA: Harvard University Press; 1980.
24. Feinleib M, Kannel WB, Garrison RJ, McNamara PM, Castelli WP. The Framingham Offspring Study. Design and preliminary data. *Prev Med*. 1975;4(4):518-25.
25. Parish S, Collins R, Peto R, Youngman L, Barton J, Jayne K, et al. Cigarette smoking, tar yields, and non-fatal myocardial infarction: 14,000 cases and 32,000 controls in the United Kingdom. The International Studies of Infarct Survival (ISIS) Collaborators. *BMJ (Clinical research ed)*. 1995;311(7003):471-7.
26. Law MR, Morris JK, Wald NJ. Environmental tobacco smoke exposure and ischaemic heart disease: an evaluation of the evidence. *BMJ (Clinical research ed)*. 1997;315(7114):973-80.
27. Medical Expenditure Panel Survey. Medical Expenditure Panel Survey Public Use Files 1996-2001 [Available from: <http://www.meps.ahrq.gov/Puf/PufSearch.asp?SearchOption=Keyword>]
28. Huffman MD, Mohanan PP, Devarajan R, Baldrige AS, Kondal D, Zhao L, et al. Effect of a Quality Improvement Intervention on Clinical Outcomes in Patients in India With Acute Myocardial Infarction: The ACS QUIK Randomized Clinical Trial. *Jama*. 2018;319(6):567-78.
29. Witt BJ, Brown RD, Jr., Jacobsen SJ, Weston SA, Yawn BP, Roger VL. A community-based study of stroke incidence after myocardial infarction. *Annals of internal medicine*. 2005;143(11):785-92.
30. Yasui D, Asayama K, Ohkubo T, Kikuya M, Kanno A, Hara A, et al. Stroke Risk in Treated Hypertension Based on Home Blood Pressure: the Ohasama Study. *American Journal of Hypertension*. 2010;23(5):508-14.
31. Amarenco P, Bogousslavsky J, Callahan A, 3rd, Goldstein LB, Hennerici M, Rudolph AE, et al. High-dose atorvastatin after stroke or transient ischemic attack. *The New England journal of medicine*. 2006;355(6):549-59.
32. Appelros P, Gunnarsson KE, Terent A. Ten-year risk for myocardial infarction in patients with first-ever stroke: a community-based study. *Acta neurologica Scandinavica*. 2011;124(6):383-9.
33. Behar S, Tanne D, Abinader E, Agmon J, Barzilai J, Friedman Y, et al. Cerebrovascular accident complicating acute myocardial infarction: incidence, clinical significance and short- and long-term mortality rates. The SPRINT Study Group. *The American journal of medicine*. 1991;91(1):45-50.
34. Lakshminarayan K, Schissel C, Anderson DC, Vazquez G, Jacobs DR, Jr., Ezzeddine M, et al. Five-year rehospitalization outcomes in a cohort of patients with acute ischemic stroke: Medicare linkage study. *Stroke; a journal of cerebral circulation*. 2011;42(6):1556-62.
35. Prosser J, MacGregor L, Lees KR, Diener HC, Hacke W, Davis S. Predictors of early cardiac morbidity and mortality after ischemic stroke. *Stroke; a journal of cerebral circulation*. 2007;38(8):2295-302.
36. Touze E, Varenne O, Chatellier G, Peyrard S, Rothwell PM, Mas JL. Risk of myocardial infarction and vascular death after transient ischemic attack and ischemic stroke: a systematic review and meta-analysis. *Stroke; a journal of cerebral circulation*. 2005;36(12):2748-55.
37. Health MSf. *International Medical Products Price Guide: 2015 edition*. 2015.
38. Lee SE, Lee HY, Cho HJ, Choe WS, Kim H, Choi JO, et al. Clinical Characteristics and Outcome of Acute Heart Failure in Korea: Results from the Korean Acute Heart Failure Registry (KorAHF). *Korean circulation journal*. 2017;47(3):341-53.
39. Choi DJ, Han S, Jeon ES, Cho MC, Kim JJ, Yoo BS, et al. Characteristics, outcomes and predictors of long-term mortality for patients hospitalized for acute heart failure: a report from the Korean heart failure registry. *Korean circulation journal*. 2011;41(7):363-71.
40. Global, regional, and national age-sex-specific mortality for 282 causes of death in 195 countries and territories, 1980-2017: a systematic analysis for the Global Burden of Disease Study 2017. *Lancet (London, England)*. 2018;392(10159):1736-88.

41. Stenberg K, Lauer JA, Gkountouras G, Fitzpatrick C, Stanciole A. Econometric estimation of WHO-CHOICE country-specific costs for inpatient and outpatient health service delivery. *Cost Effectiveness and Resource Allocation*. 2018;16(1):11.
42. Health FMO. National strategic action plan (NSAP) for prevention & control of non-communicable diseases in Ethiopia, 2014-2016. 2014:43-7.
43. Mieraf Tadesse Tolla OFN, Solomon Tessema Memirie, Senbeta Guteta Abdisa, Awel Ababulgu, Degu Jerene, Melanie Bertram, Kirsten Strand, Stéphane Verguet and Kjell Arne Johansson. Prevention and treatment of cardiovascular disease in Ethiopia: cost-effectiveness analysis. *Cost Eff Resour Alloc* 2016;14(10).
44. Tan-Torres Edejer T, Acharya A, Adam Ta, Baltussen R, Evans DB, Hutubessy R, et al. Making choices in health: WHO guide to cost-effectiveness analysis. 2003.
45. Iftikhar A. Ethiopia Decent Work Check. Amsterdam: WageIndicator Foundation; 2019. p. 49.
46. Wang G, Zhang Z, Ayala C. Hospitalization Costs Associated With Hypertension as a Secondary Diagnosis Among Insured Patients Aged 18–64 Years. *American Journal of Hypertension*. 2010;23(3):275-81.
47. Kuriakose A, Nair Anish TS, Soman B, Varghese RT, Sreelal TP, Mendez AM, et al. Rate and Risk of All Cause Mortality among People with Known Hypertension in a Rural Community of Southern Kerala, India: The Results from the Prolife Cohort. *Int J Prev Med*. 2014;5(5):596-603.
48. Atlas. WD. Ethiopia - Crude death rate. 2020.
49. Kelemu Tilahun Kibret, Mesfin YM. Prevalence of hypertension in Ethiopia: a systematic meta-analysis. *Public Health Reviews* 2015;36(14).
50. WHO. Non-communicable diseases country profiles 2018. Geneva: World Health Organization. 2018.
51. Helelo TP GY, Adane AA. Prevalence and Associated Factors of Hypertension among Adults in Durame Town, Southern Ethiopia. *PLoS ONE*. 2014;9(11):e112790.
52. Shukuri A, Tewelde T, Shaweno T. Prevalence of old age hypertension and associated factors among older adults in rural Ethiopia. *Integrated blood pressure control*. 2019;12:23-31.
53. Zhou D, Xi B, Zhao M, Wang L, Veeranki SP. Uncontrolled hypertension increases risk of all-cause and cardiovascular disease mortality in US adults: the NHANES III Linked Mortality Study. *Sci Rep*. 2018;8(1):9418.
54. Najafi F, Karami-Matin B, Rezaei S, Khosravi A, Soofi M. Productivity costs and years of potential life lost associated with five leading causes of death: Evidence from Iran (2006-2010). *Med J Islam Repub Iran*. 2016;30:412-.
55. Noh J, Kim HC, Shin A, Yeom H, Jang S-Y, Lee JH, et al. Prevalence of Comorbidity among People with Hypertension: The Korea National Health and Nutrition Examination Survey 2007-2013. *Korean Circ J*. 2016;46(5):672-80.
56. Organization WH. WHO methods and data sources for global burden of disease estimates 2000-2016. *Global Health Estimates Technical Paper WHO/HIS/IER/GHE/20184*, WHO, Geneva. 2018.
57. Suchard MA, Schuemie MJ, Krumholz HM, You SC, Chen R, Pratt N, et al. Comprehensive comparative effectiveness and safety of first-line antihypertensive drug classes: a systematic, multinational, large-scale analysis. *Lancet*. 2019;394(10211):1816-26.
58. Law M, Wald N, Morris J, Jordan R. Value of low dose combination treatment with blood pressure lowering drugs: analysis of 354 randomised trials. *Bmj*. 2003;326(7404):1427.
59. Law MR, Morris JK, Wald NJ. Use of blood pressure lowering drugs in the prevention of cardiovascular disease: meta-analysis of 147 randomised trials in the context of expectations from prospective epidemiological studies. *BMJ (Clinical research ed)*. 2009;338:b1665.
60. Sorato MM, Davari M, Kebriaeezadeh A, Sarrafzadegan N, Shibru T, Fatemi B. Risk of fatal and nonfatal coronary heart disease and stroke events among adult patients with hypertension: basic Markov model inputs for evaluating cost-effectiveness of hypertension treatment: systematic review of cohort studies. *Journal of Pharmaceutical Health Services Research*. 2021;12(2).
61. Zawudie AB, Lemma TD, Daka DW. Cost of Hypertension Illness and Associated Factors Among Patients Attending Hospitals in Southwest Shewa Zone, Oromia Regional State, Ethiopia. *Clinicoecon Outcomes Res*. 2020;12:201-11.

- 1  
2  
3 62. Adane E, Atnafu A, Aschalew AY. The Cost of Illness of Hypertension and Associated Factors at the  
4 University of Gondar Comprehensive Specialized Hospital Northwest Ethiopia, 2018. Clinicoecon Outcomes  
5 Res [Internet]. 2020 2020; 12:[133-40 pp.]. Available from: <http://europepmc.org/abstract/MED/32184636>  
6  
7 <https://doi.org/10.2147/CEOR.S234674>  
8  
9 <https://europepmc.org/articles/PMC7064277>  
10  
11 <https://europepmc.org/articles/PMC7064277?pdf=render>.
- 12 63. Offei S. Economic Burden of Hypertension among Patients Attending Nsawam-Government Hospital  
13 in the Nsawam-Adoagyiri Municipality, Eastern Region, Ghana: University of Ghana; 2018.
- 14 64. Weaver CG, Clement FM, Campbell NRC, James MT, Klarenbach SW, Hemmelgarn BR, et al.  
15 Healthcare Costs Attributable to Hypertension. *Hypertension*. 2015;66(3):502-8.
- 16 65. Kirkland EB, Heincelman M, Bishu KG, Schumann SO, Schreiner A, Axon RN, et al. Trends in  
17 healthcare expenditures among US adults with hypertension: national estimates, 2003–2014. *Journal of the*  
18 *American Heart Association*. 2018;7(11):e008731.
- 19 66. Cohen JD. Hypertension epidemiology and economic burden: refining risk assessment to lower costs.  
20 *Managed care (Langhorne, Pa)*. 2009;18(10):51-8.
- 21 67. Adeniji F. Burden of out-of-pocket payments among patients with cardiovascular disease in public and  
22 private hospitals in Ibadan, South West, Nigeria: a cross-sectional study. *BMJ Open*. 2021;11(6):e044044-e.
- 23 68. Pogossova N. Costs associated with cardiovascular disease create a significant burden for society and  
24 they seem to be globally underestimated. *European Journal of Preventive Cardiology*. 2020;26(11):1147-9.
- 25 69. Le C, Zhankun S, Jun D, Keying Z. The economic burden of hypertension in rural south-west China.  
26 *Tropical Medicine & International Health*. 2012;17(12):1544-51.
- 27 70. Sorato MM, Davari M, Kebriaeezadeh A, Sarrafzadegan N, Shibru T, Fatemi B. Reasons for poor  
28 blood pressure control in Eastern Sub-Saharan Africa: looking into 4P's (primary care, professional, patient,  
29 and public health policy) for improving blood pressure control: a scoping review. *BMC Cardiovascular*  
30 *Disorders*. 2021;21(1):123.
- 31 71. Yoruk A, Boulous PK, Bisognano JD. The State of Hypertension in Sub-Saharan Africa: Review and  
32 Commentary. *American Journal of Hypertension*. 2017;31(4):387-8.
- 33 72. Gaziano TA, Bitton A, Anand S, Weinstein MC. The global cost of nonoptimal blood pressure. *Journal*  
34 *of hypertension*. 2009;27(7):1472-7.
- 35 73. Hird TR, Zomer E, Owen AJ, Magliano DJ, Liew D, Ademi Z. Productivity Burden of Hypertension  
36 in Australia: A Life Table Modeling Study. *Hypertension*. 2019;73(4):777-84.
- 37 74. Flack JM, Casciano R, Casciano J, Doyle J, Arikian S, Tang S, et al. Cardiovascular disease costs  
38 associated with uncontrolled hypertension. *Managed care interface*. 2002;15(11):28-36.  
39  
40  
41  
42  
43  
44  
45  
46  
47  
48  
49  
50  
51  
52  
53  
54  
55  
56  
57  
58  
59  
60

## Legends

## List of Figures

**Figure 1:** Micro-costing Bottom-up Approach for Healthcare costs. Adapted from Riewpaiboon A, et al. Cost analysis for efficient management: diabetes treatment at a public district hospital in Thailand.

**Figure 2:** Number of premature deaths and years of life lost (YLL) due to morbidity among adults with hypertension by sex, treatment and control status over productive life years simulated from life table modelling in Southern Ethiopia

For peer review only

1  
2  
3  
4  
5  
6  
7  
8  
9  
10  
11  
12  
13  
14  
15  
16  
17  
18  
19  
20  
21  
22  
23  
24  
25  
26  
27  
28  
29  
30  
31  
32  
33  
34  
35  
36  
37  
38  
39  
40  
41  
42  
43  
44  
45  
46  
47  
48  
49  
50  
51  
52  
53  
54  
55  
56  
57  
58  
59  
60

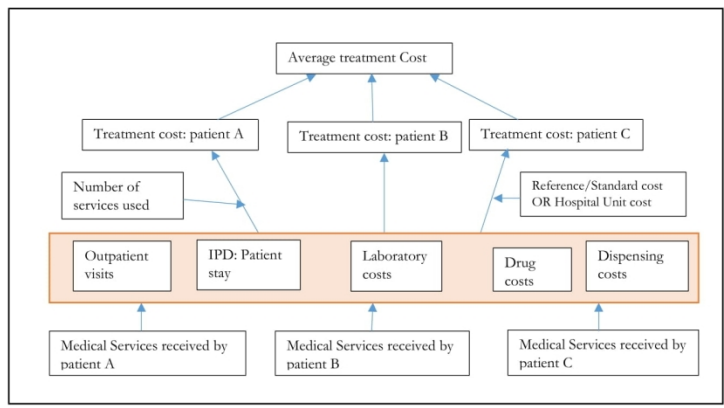

599x776mm (72 x 72 DPI)

1  
2  
3  
4  
5  
6  
7  
8  
9  
10  
11  
12  
13  
14  
15  
16  
17  
18  
19  
20  
21  
22  
23  
24  
25  
26  
27  
28  
29  
30  
31  
32  
33  
34  
35  
36  
37  
38  
39  
40  
41  
42  
43  
44  
45  
46  
47  
48  
49  
50  
51  
52  
53  
54  
55  
56  
57  
58  
59  
60

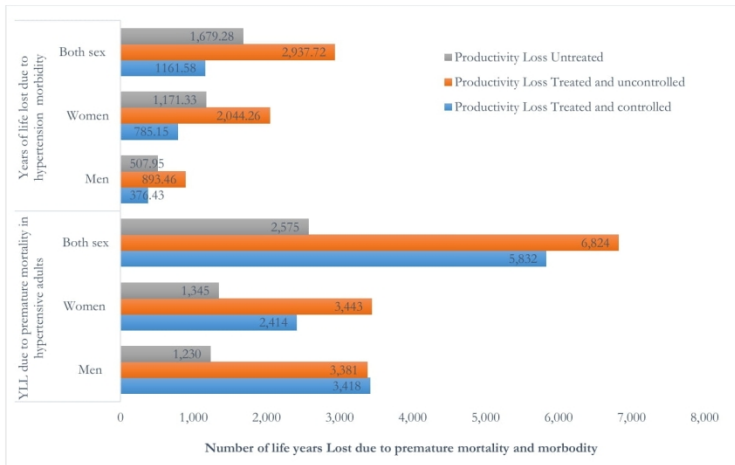

599x776mm (72 x 72 DPI)



**Supplementary materials:** Economic burden of hypertension at selected Hospitals in Southern Ethiopia; a patient level analysis

**Cardiovascular disease policy model**

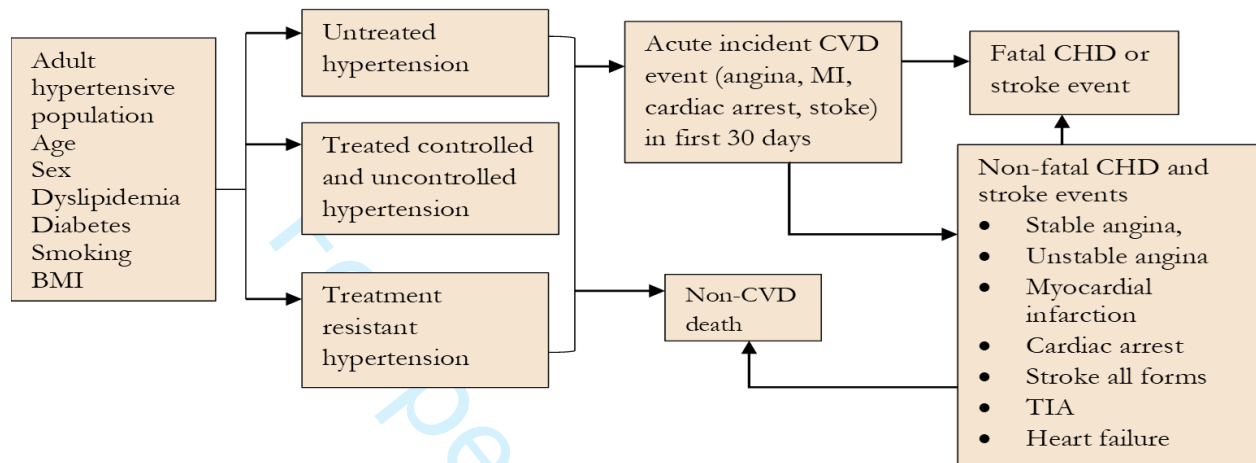

**Supplementary Figure 1:** Cardiovascular disease policy model adapted for Sub-Saharan African perspective (1).

**Supplementary Table 1:** Age and sex specific distribution of Ethiopian population 2020 estimate, prevalence of hypertension and adult mortality rate

| Age structure                     | Male       | Female     | Total       | Estimated prevalence of hypertension | Mortality rate |         | Data Source |
|-----------------------------------|------------|------------|-------------|--------------------------------------|----------------|---------|-------------|
|                                   |            |            |             |                                      | Men            | Women   |             |
| <b>Prevalence of hypertension</b> |            |            |             |                                      |                |         | (2-8)       |
| 0-14 years                        | 21,657,152 | 21,381,628 | 43,038,780  | NA                                   | -              | -       |             |
| 15-19                             | 5,572,330  | 5,464,174  | 11,036,504  | 19.6                                 | 0.00286        | 0.00222 |             |
| 20-24                             | 5,930,683  | 5,816,173  | 11,746,856  | 19.6                                 | 0.00319        | 0.00223 |             |
| 25-29                             | 4,889,739  | 4,802,450  | 9,692,189   | 19.6                                 | 0.00293        | 0.00232 |             |
| 30-34                             | 3,761,349  | 3,757,544  | 7,518,893   | 23.0                                 | 0.00397        | 0.00368 |             |
| 35-39                             | 3,091,148  | 3,182,837  | 6,273,985   | 23.0                                 | 0.00411        | 0.00222 |             |
| 40-44                             | 2,445,523  | 2,488,422  | 4,933,945   | 25.9                                 | 0.00584        | 0.00385 |             |
| 45-49                             | 2,071,480  | 2,033,228  | 4,104,708   | 25.9                                 | 0.00360        | 0.00457 |             |
| 50-54                             | 1,567,789  | 1,660,957  | 3,228,746   | 41.9                                 | 0.00354        | 0.00274 |             |
| 55-59                             | 1,159,002  | 1,316,318  | 2,475,320   | 41.9                                 | 0.00354        | 0.00274 |             |
| 60-64                             | 946,594    | 1,109,670  | 2,056,264   | 41.9                                 | 0.00354        | 0.00274 |             |
| ≥ 65 years                        | 1,676,478  | 1,977,857  | 3,654,335   | 41.9                                 | 0.00354        | 0.00274 |             |
| Total                             | 54,769,267 | 54,991,258 | 109,760,525 |                                      |                |         |             |
|                                   |            |            |             | Prevalence of untreated hypertension |                |         |             |
| For all ages (15 +)               |            |            |             | 13.25                                |                |         | (9)         |

**Supplementary Table 2.** Model Parameters, Cohort Setting, and Probability of Transition between states and Disability weights for hypertension and related complications the Global Burden of Disease 2013 study and WHO Global Health Estimates

| Parameter                                                          | Data                                             | Source         |
|--------------------------------------------------------------------|--------------------------------------------------|----------------|
| Relative risk of hypertension treatment                            |                                                  |                |
| Relative risk of CHD event on hypertension treatment               | 0.683 (95% CI, 0.633–0.717)                      | (10-13)        |
| Relative risk of a cerebrovascular event on hypertension treatment | 0.633 (95% CI, 0.526–0.717)                      | (14)           |
| Relative risk of CHD event on normotensive men and women           | 0.49 (95% CI 0.458–0.513) and 0.32 (0.292–0.342) | (15)           |
| <b>Transition probabilities to death</b>                           |                                                  |                |
| <b>Health state</b>                                                | <b>Disability weight Estimate</b>                | <b>Source</b>  |
| <b>Hypertension</b>                                                |                                                  | <b>(16)</b>    |
| Treated                                                            | 0.246                                            |                |
| Untreated                                                          | 0.323                                            |                |
| Treated and controlled                                             | 0.171                                            |                |
| <b>Myocardial Infarction (MI)</b>                                  |                                                  | <b>(17)</b>    |
| Day 1-2                                                            | 0.432                                            |                |
| Days 3-28                                                          | 0.074                                            |                |
| <b>Angina Pectoris</b>                                             |                                                  |                |
| Mild                                                               | 0.033                                            |                |
| Moderate                                                           | 0.080                                            |                |
| Severe                                                             | 0.167                                            |                |
| <b>Heart failure</b>                                               |                                                  | <b>(18-20)</b> |
| Mild                                                               | 0.041                                            |                |
| Moderate                                                           | 0.072                                            |                |
| <b>Diabetes, digestive, and genitourinary disease</b>              |                                                  |                |
| <b>Diabetes</b>                                                    | 0.015 (0.012 - 0.018)                            | <b>(18-20)</b> |
| <b>Treated</b>                                                     | 0.033                                            |                |
| <b>Untreated</b>                                                   | 0.012                                            |                |

|                                                 |                     |
|-------------------------------------------------|---------------------|
| Diabetic neuropathy                             | 0.133               |
| Chronic kidney disease (stage IV)               | 0.104               |
| End-stage renal disease: with kidney transplant | 0.024               |
| End-stage renal disease: on dialysis            | 0.571               |
| Disutility due to daily medication              | 0.049 (0.031–0.072) |
| <b>Acute Events</b>                             |                     |
| Myocardial Infarction                           | 0.432 (0.288–0.579) |
| Stroke                                          | 0.570 (0.377–0.707) |
| Occurrence of second or later CVD event         | 0.985 (0.992–0.989) |
| <b>Chronic States</b>                           |                     |
| Ischemic Heart Disease                          | 0.08 (0.02–0.24)    |
| Stroke                                          | 0.135 (0.01–0.437)  |
| Alive post 2+ CVD Events                        | 0.242 (0.11–0.437)  |

CHD, coronary heart disease; SMR, standardized mortality ratio. \*Age and sex dependent †Applied multiplicatively to general population age- and sex-dependent utilities; CHD= Angina pectoris, coronary insufficiency, myocardial infarction, or coronary death.

**Supplementary table 3:** Simulation input parameters

| Input parameter                                              | Value                                                                                                                                                                                                             | Source                                                                                             |
|--------------------------------------------------------------|-------------------------------------------------------------------------------------------------------------------------------------------------------------------------------------------------------------------|----------------------------------------------------------------------------------------------------|
| Non-CVD death rate                                           | 0.005–0.176 (Age- and sex specific)#                                                                                                                                                                              | Calculated from WHO lifetables and GBD 2017 (21)                                                   |
| Probability of first-time cardiovascular disease (CVD) event | Individual risk characteristic specific                                                                                                                                                                           | Obtained from the Globorisk Office Calculator standardized for India [25]                          |
| <b>Acute CVD events</b>                                      |                                                                                                                                                                                                                   |                                                                                                    |
| MI                                                           |                                                                                                                                                                                                                   |                                                                                                    |
| Probability of MI if CVD event occurs                        | 37.6– 66.7% (Age- and sex specific)#                                                                                                                                                                              | Calculated based on GBD 2017(21)                                                                   |
| 30-day fatality                                              | 0.01–0.13 (Age- and sex-specific)#                                                                                                                                                                                | Calibrated based on findings of Huffman et al. 2018 (22)                                           |
| Re-infarction (in 30 days)                                   | 0.0120 (0.0099–0.0141)ψ                                                                                                                                                                                           | ACS QUIK Study by Huffman et al. 2018 (22)                                                         |
| Acute Stroke (in 30 days)                                    | 0.0060 (0.0045–0.0075)ψ                                                                                                                                                                                           | ACS QUIK Study by Huffman et al. 2018 (22)                                                         |
| Stroke                                                       |                                                                                                                                                                                                                   |                                                                                                    |
| Probability of Stroke if CVD event occurs                    | 33.2–62.3% (Age- and sex specific)#                                                                                                                                                                               | Calculated based on GBD 2017 (21) And Jushua D. Bundry et al(23)                                   |
| 30-day fatality                                              | 0.12, 0.13 (Sex-specific)#                                                                                                                                                                                        | Calibrated based on a multi-site study by Pandian and Sudhan 2013 [30]                             |
| Repeat Stroke (in 30 days)                                   | 0.15 (0.1–0.2)ψ                                                                                                                                                                                                   | Petty et al. 1998 (24)                                                                             |
| Sudden cardiac death                                         | 0.10 per 100 patient-years (95% CI, 0.07–0.14) in a cohort of 33 of 3242 untreated hypertensive patients without evidence of coronary or cerebrovascular HD at entry and followed up for an average of 10.3 years | Heart disease and stroke statistics 2021 update                                                    |
| <b>Heart failure</b>                                         |                                                                                                                                                                                                                   |                                                                                                    |
| Probability of AHF                                           |                                                                                                                                                                                                                   |                                                                                                    |
| 30-days fatality                                             | 0.0945                                                                                                                                                                                                            | Obtained from the THESUS-HF registry (25) and Korean Acute Heart Failure Registry (KorAHF)(26, 27) |

|                                                                         |                                            |                                                                                                                                                                                                                              |
|-------------------------------------------------------------------------|--------------------------------------------|------------------------------------------------------------------------------------------------------------------------------------------------------------------------------------------------------------------------------|
| Re-hospitalization                                                      | 0.0736                                     | Obtained from the THESUS-HF registry (25)                                                                                                                                                                                    |
| <b>Chronic events</b>                                                   |                                            |                                                                                                                                                                                                                              |
| Monthly risk of mortality                                               | 0.001–0.019 (Age- and sex-specific)#       | Calibrated based on GBD 2017 (21)                                                                                                                                                                                            |
| Reinfarction                                                            | 0.079 (0.073–0.085)ψ                       | Based on Steg et al. 2007 (28) and derived by Lin et al. 2019 (20)                                                                                                                                                           |
| Acute Stroke                                                            | 0.014 (0.012–0.016)ψ                       | Based on Steg et al. 2007 (28) and derived by Lin et al. 2019 (20)<br>Continue Or Stop post-Stroke Antihypertensives Collaborative Study (COSSACS) (29), BP reduction and secondary stroke prevention: systematic review(30) |
| Stroke                                                                  |                                            |                                                                                                                                                                                                                              |
| Monthly risk of mortality                                               | 0.001–0.013 (Age- and sex specific)#       | Calibrated based on GBD 2017 (21)<br><br>Stroke Risk in Treated Hypertension Based on Home Blood Pressure: the Ohasama Study(31)                                                                                             |
| Acute MI                                                                | 0.043 (0.038–0.048)ψ                       | Based on Steg et al. 2007 (28) and derived by Lin et al. 2019 (20)                                                                                                                                                           |
| Acute Stroke                                                            | 0.037 (0.033–0.041)                        | Based on Steg et al. 2007 (28) and derived by Lin et al. 2019 (20)                                                                                                                                                           |
| Relative risk of fatality for an individual with two or more CVD events | 1.5                                        | Smolina et al. 2012 (32)                                                                                                                                                                                                     |
| <b>Heart failure</b>                                                    |                                            |                                                                                                                                                                                                                              |
| <b>Incidence</b>                                                        |                                            |                                                                                                                                                                                                                              |
| 1 year mortality                                                        |                                            |                                                                                                                                                                                                                              |
| Re-hospitalization                                                      |                                            | <b>Moita B.eta al. 2019(36) and (37)</b>                                                                                                                                                                                     |
| <b>Effect of antihypertensive medication</b>                            |                                            |                                                                                                                                                                                                                              |
| Medication protocol for an individual                                   | Initial SBP-specific#                      | Based on Ethiopian NCD control guideline                                                                                                                                                                                     |
| IHD relative risk due to medication                                     | 0.32–0.89 (Age- and initial SBP-specific)# | Based on findings by Law et al. 2009 (38) and Asayam Kei., 2017(39)                                                                                                                                                          |
| Stroke relative risk due to medication                                  | 0.20–0.89 (Age- and initial SBP-specific)# | Based on findings by Law et al. 2009(38)                                                                                                                                                                                     |
| IHD relative risk if partially adherent                                 | 0.66–0.95 (Age- and initial SBP-specific)  | Calculated based on a linear relationship between adherence and efficacy as considered by Cherry et al. 2009(40)                                                                                                             |
| Stroke relative risk if partially adherent                              | 0.60–0.95 (Age- and initial SBP-specific)  | Calculated based on a linear relationship between adherence and efficacy as considered by Cherry et al. 2009 (40) and Lisheng Liu, Zengwu Wang. et al(41)                                                                    |

**Supplementary Table 4:** Price of drugs, medical supplies, procedures and professional time used for management of hypertension in Southern Ethiopia, January, 2021

| List of medicines                                                                                        | Unit   | Price in 2021 Ethiopian birr |              | Price USD                | Source                                                                                                                                 |
|----------------------------------------------------------------------------------------------------------|--------|------------------------------|--------------|--------------------------|----------------------------------------------------------------------------------------------------------------------------------------|
|                                                                                                          |        | Wholesale price              | Retail price | Retail Price in 2021 USD |                                                                                                                                        |
| Acetylsalicylic Acid - 81mg – Tablet (coated)                                                            | 10x10  | 43.72                        | 1.32         | 1.303                    | Ethiopian Pharmaceutical supply agency, Arba Minch Hub wholesale price 2021 and Arba Minch General hospital pharmacy retail price 2021 |
| Adrenaline (Epinephrine)-0.1% in 1mL ampoule                                                             | Each   | 36.032                       | 1.09         | 1.074                    |                                                                                                                                        |
| Amiodarone - 100mg – Tablet                                                                              | 10x3   | 313.34                       | 9.44         | 9.337                    |                                                                                                                                        |
| Amlodipine - 10mg - Tablet                                                                               | 10x10  | 105.44                       | 3.18         | 3.142                    |                                                                                                                                        |
| Amlodipine - 5mg – Tablet                                                                                | 10x10  | 75.26                        | 2.27         | 2.243                    |                                                                                                                                        |
| Atenolol - 50mg – Tablet                                                                                 | 10x10  | 58.70                        | 1.77         | 1.749                    |                                                                                                                                        |
| Atorvastatin - 20mg – Tablet                                                                             | 10x10  | 195.68                       | 5.89         | 5.831                    |                                                                                                                                        |
| Atorvastatin - 40mg – Tablet                                                                             | 10x3   | 140.76                       | 4.24         | 4.195                    |                                                                                                                                        |
| Beclomethasone Propionate -100mcg/dose – Aerosol                                                         | 200 MD | 131.85                       | 3.97         | 3.929                    |                                                                                                                                        |
| Candesartan - 8mg – Tablet                                                                               | 14x2   | 152.63                       | 4.60         | 4.548                    |                                                                                                                                        |
| Captopril - 12.5mg – Tablet                                                                              | 10x10  | 33.54                        | 1.01         | 1.000                    |                                                                                                                                        |
| Captopril - 25mg – Tablet                                                                                | 10x10  | 26.91                        | 0.81         | 0.802                    |                                                                                                                                        |
| Dexamethasone - 4mg/ml in 1ml Ampoule - Injection                                                        | 10     | 3.95                         | 0.12         | 0.118                    |                                                                                                                                        |
| Captopril + HCT (50mg + 25mg)-Tablet                                                                     | 10x10  | 57.32                        | 1.73         | 1.708                    |                                                                                                                                        |
| Digoxin - 0.25mg – Tablet                                                                                | 10x10  | 202.18                       | 6.09         | 6.025                    |                                                                                                                                        |
| Enalapril Maleate - 10mg - Tablet                                                                        | 10x10  | 61.57                        | 1.85         | 1.835                    |                                                                                                                                        |
| Enalapril Maleate - 5mg – Tablet                                                                         | 10x10  | 63.92                        | 1.93         | 1.905                    |                                                                                                                                        |
| Enalapril Maleate – 2.5mg – Tablet                                                                       | 10x10  | 19.98                        | 0.60         | 0.595                    |                                                                                                                                        |
| Enalapril Maleate +HCT (10 mg + 25 mg)-tablet                                                            | 10x10  | 78.22                        | 2.36         | 2.331                    |                                                                                                                                        |
| Glibenclamide - 5mg – Tablet                                                                             | 10x10  | 39.09                        | 1.18         | 1.165                    |                                                                                                                                        |
| Glucose 40% in 20 mL – IV infusion                                                                       | Each   | 2.54                         | 0.08         | 0.076                    |                                                                                                                                        |
| Glyceryl Trinitrate - 0.4mg – Tablet (Sublingual)                                                        | 100    | 487.21                       | 14.67        | 14.518                   |                                                                                                                                        |
| Hydralazine - 20mg/ml in 1ml ampoule - Injection                                                         | 5      | 204.01                       | 6.14         | 6.079                    |                                                                                                                                        |
| Hydrochlorothiazide - 25mg – Tablet                                                                      | 25x4   | 48.05                        | 1.45         | 1.432                    |                                                                                                                                        |
| Insulin Isophane Biphasic (Soluble/Isophane Mixture)- (30 + 70)IU/ml in 10ml Vial -Injection(Suspension) | Each   | 85.20                        | 2.57         | 2.539                    |                                                                                                                                        |
| Insulin Isophane Human - 100IU/ml in 10ml Vial - Injection(Suspension)                                   | Each   | 100.28                       | 3.02         | 2.988                    |                                                                                                                                        |
| Insulin Soluble Human - 100IU/ml in 10ml Vial                                                            | Each   | 106.21                       | 3.20         | 3.165                    |                                                                                                                                        |
| Lovastatin - 20mg – Tablet                                                                               | 10x10  | 84.59                        | 2.55         | 2.521                    |                                                                                                                                        |
| Metformin - 500mg – Tablet                                                                               | 10     | 27.78                        | 0.84         | 0.828                    |                                                                                                                                        |
| Methyldopa - 250mg – Tablet                                                                              | 100x10 | 51.75                        | 1.56         | 1.542                    |                                                                                                                                        |
| Metoprolol - 50mg – Tablet                                                                               | 10x10  | 94.43                        | 2.84         | 2.814                    |                                                                                                                                        |
| Morphine sulphate-30mg-tablet                                                                            | 110    | 410.71                       | 12.37        | 12.239                   |                                                                                                                                        |
| Nifedipine - 20mg – Tablet                                                                               | 10x10  | 58.70                        | 1.77         | 1.749                    |                                                                                                                                        |
| Prednisolone - 5 mg – Tablet                                                                             | 100x10 | 342.23                       | 10.31        | 10.198                   |                                                                                                                                        |
| Propranolol - 40mg – Tablet                                                                              | 10x10  | 67.54                        | 2.03         | 2.013                    |                                                                                                                                        |
| Propylthiouracil - 100mg - Tablet (Scored)                                                               | 100    | 633.87                       | 19.09        | 18.889                   |                                                                                                                                        |
| Salbutamol - 0.1mg/dose - Aerosol (Oral Inhalation)                                                      | 200 MD | 117.20                       | 3.53         | 3.492                    |                                                                                                                                        |
| Spironolactone - 25mg – Tablet                                                                           | 10x10  | 81.87                        | 2.47         | 2.440                    |                                                                                                                                        |
| Thyroxin Sodium - 0.1mg – Tablet                                                                         | 100    | 178.49                       | 5.38         | 5.319                    |                                                                                                                                        |
| Valsartan + HCT (80mg +12.5mg)                                                                           | 7*2    | 38.47                        | 1.16         | 1.146                    |                                                                                                                                        |
| <b>Laboratory and imaging costs</b>                                                                      |        | <b>Price per test ETB</b>    |              | Price in 2021 USD        |                                                                                                                                        |
| CBC                                                                                                      |        | 75.00                        |              | 1.72                     | Arba Minch General Hospital Laboratory service price 2021                                                                              |
| FBG/RBS                                                                                                  |        | 20.00                        |              | 0.46                     |                                                                                                                                        |
| Lipid profile (LDL, HDL, Total cholesterol, Triglyceride)                                                |        | 160.00                       |              | 3.68                     |                                                                                                                                        |
| ECG                                                                                                      |        | 120.00                       |              | 2.76                     |                                                                                                                                        |
| ECO                                                                                                      |        | 350.00                       |              | 8.05                     |                                                                                                                                        |
| CT-scan                                                                                                  |        | 1200                         |              | 27.59                    |                                                                                                                                        |
| RFT (bilirubin, creatinine)                                                                              |        | 80.00                        |              | 1.84                     |                                                                                                                                        |
| Chest-ray                                                                                                |        | 726                          |              | 16.69                    |                                                                                                                                        |
| Urine analysis                                                                                           |        | 15.00                        |              | 0.34                     |                                                                                                                                        |
| Body fluid analysis                                                                                      |        | 100.00                       |              | 2.30                     |                                                                                                                                        |
| H. pylori                                                                                                |        | 50.00                        |              | 1.15                     |                                                                                                                                        |

|                                                                                     |                                                                 |                                                                                                                                             |                                  |
|-------------------------------------------------------------------------------------|-----------------------------------------------------------------|---------------------------------------------------------------------------------------------------------------------------------------------|----------------------------------|
| Liver function test (AST, ALT, ALP)                                                 | 120.00                                                          | 2.76                                                                                                                                        |                                  |
| Thyroid function test (T3, T4, TSH)                                                 | 432.00                                                          | 9.93                                                                                                                                        |                                  |
| <b>Hospital bed days</b>                                                            |                                                                 |                                                                                                                                             |                                  |
| Primary hospital                                                                    | 52.52                                                           | 1.21                                                                                                                                        | WHO Choice (42) inflated to 2021 |
| Secondary hospital                                                                  | 54.76                                                           | 1.26                                                                                                                                        |                                  |
| Tertiary hospital                                                                   | 70.81                                                           | 1.63                                                                                                                                        |                                  |
| <b>Health facility visit</b>                                                        |                                                                 | 0.00                                                                                                                                        |                                  |
| Primary hospital                                                                    | 18.58                                                           | 0.43                                                                                                                                        |                                  |
| Secondary hospital                                                                  | 21.17                                                           | 0.49                                                                                                                                        |                                  |
| Tertiary hospital                                                                   | 22.06                                                           | 0.51                                                                                                                                        |                                  |
| Health center visit                                                                 | 23.00                                                           | 0.53                                                                                                                                        |                                  |
| PCI intervention                                                                    | 63,000.00                                                       | 1448.28                                                                                                                                     |                                  |
| In-patient costs for MI                                                             | 45240.00                                                        | 1040.00                                                                                                                                     |                                  |
| In-patient costs for Stroke                                                         | 40890.00                                                        | 940.00                                                                                                                                      |                                  |
| Outpatient cost for IHD (per annum)                                                 | 1957.50                                                         | 45.00                                                                                                                                       |                                  |
| Outpatient cost for Stroke (per annum)                                              | 2914.50                                                         | 67.00                                                                                                                                       |                                  |
| <b>Salary scale of human resource</b>                                               |                                                                 | 0.00                                                                                                                                        |                                  |
| Physician                                                                           | 21,100.00                                                       | 485.06                                                                                                                                      | MOH, Ethiopia 2012/2019 (43).    |
| Acute care nurse                                                                    | 7470.00                                                         | 171.72                                                                                                                                      |                                  |
| Pharmacy personnel                                                                  | 8047.00                                                         | 184.99                                                                                                                                      |                                  |
| Laboratory technician                                                               | 6460.00                                                         | 148.51                                                                                                                                      |                                  |
| Program cost per person per annum                                                   | 993.29                                                          | 22.83                                                                                                                                       |                                  |
| <b>Antihypertensive treatment</b>                                                   |                                                                 |                                                                                                                                             |                                  |
| Antihypertensive medication (per individual per annum)                              | Drug costs based on national Drug supply agency wholesale price |                                                                                                                                             |                                  |
| Out-patient consultations (per visit)                                               | \$43.36                                                         | Annual outpatient visit cost (12*WHO cost per outpatient visit inflated to 2021) WHO Choice (42)                                            |                                  |
| One-time diagnostic tests                                                           |                                                                 | Based on Laboratory procedures and test price of Arba Minch General Hospital, 2021                                                          |                                  |
| In-patient costs for MI                                                             | \$1040                                                          | WHO Choice (42) inflated to 2021                                                                                                            |                                  |
| In-patient costs for Stroke                                                         | \$940                                                           |                                                                                                                                             |                                  |
| <b>Chronic CVD care</b>                                                             |                                                                 |                                                                                                                                             |                                  |
| Secondary care medication in public sector (per individual per annum)               | \$92, \$184 (Dosage-specific)§                                  | MSH-2015 International Drug Price Indicator inflated to 2021(25)                                                                            |                                  |
| Outpatient cost for IHD (per annum)                                                 | \$45                                                            | WHO Choice (44) inflated to 2021                                                                                                            |                                  |
| Outpatient cost for Stroke (per annum)                                              | \$67                                                            |                                                                                                                                             |                                  |
| Average inflation rate Ethiopia                                                     | 16.58%                                                          | <a href="https://take-profit.org/en/statistics/inflation-rate/ethiopia/">https://take-profit.org/en/statistics/inflation-rate/ethiopia/</a> |                                  |
| Average inflation rate foreign                                                      | 2.02%                                                           |                                                                                                                                             |                                  |
| Percentage change                                                                   | 24.6%                                                           |                                                                                                                                             |                                  |
| Exchange rate July 2021 (1USD)                                                      | 43.5 ETB                                                        |                                                                                                                                             |                                  |
| 1USD = 20.999 ETB in 2016 and 43.5 in 2021; PPP= 12.1/8.1 = 1.5                     |                                                                 |                                                                                                                                             |                                  |
| MD: metered Dose; MOH: Ministry of Health 1 USD = 43.5 January 2021                 |                                                                 |                                                                                                                                             |                                  |
| <b>Note:</b> 30% mark-up at regional EPSA hub, 31% mark-up at Public Hospital level |                                                                 |                                                                                                                                             |                                  |

**Supplementary Table 5:** Risk of death across age and gender covariate categories stratified for hypertension

| Variables                         | Categories           | Incidence of death (%) |                | Relative risk in each category (CI) | Source |
|-----------------------------------|----------------------|------------------------|----------------|-------------------------------------|--------|
|                                   |                      | High BP group          | Normal         |                                     |        |
| Age                               | 20-29                | 1.68%                  | 0.54%          | 3.11 (1.16-8.36)                    | (8)    |
|                                   | 30-39                | 1.71%                  | 0.94%          | 1.82 (1.04-3.19)                    |        |
|                                   | 40-49                | 2.43%                  | 1.88%          | 1.29 (0.91-1.82)                    |        |
|                                   | 50-59                | 6.30%                  | 4.03%          | 1.56 (1.28-1.91)                    |        |
|                                   | 60 and above         | 19.32%                 | 15.9%          | 1.21 (1.12-1.31)                    |        |
| Gender                            | Women                | 8.71%                  | 1.1%           | 3.31 (2.98-3.68)                    | (8)    |
|                                   | Men                  | 15.47%                 | 4.62%          | 3.34(3.02-3.70)                     |        |
| <b>Risk of all case mortality</b> |                      |                        |                |                                     |        |
| Gender                            | Treatment status     | < 60 years             | > 60 years     | HR (95% CI)                         | (45)   |
| Men                               | Normal               | <b>0.0068</b>          | <b>0.0214</b>  | 1.00 (Reference)                    |        |
|                                   | Treated controlled   | <b>0.0188</b>          | <b>0.0305</b>  | 1.20 (0.92-1.57)                    |        |
|                                   | Treated uncontrolled | <b>0.0252</b>          | <b>0.0372</b>  | 1.55 (1.19-2.01)                    |        |
|                                   | Untreated            | <b>0.0197</b>          | <b>0.0336</b>  | 1.45 (1.23-1.72)                    |        |
| Women                             | Normal               | <b>0.00528</b>         | <b>0.01870</b> | 1.00 (Reference)                    |        |
|                                   | Treated controlled   | <b>0.01675</b>         | <b>0.02841</b> | 1.11 (0.84-1.47)                    |        |
|                                   | Treated uncontrolled | <b>0.02533</b>         | <b>0.03736</b> | 1.63 (1.34-1.99)                    |        |
|                                   | Untreated            | <b>0.02075</b>         | <b>0.03471</b> | 1.31 (1.06-1.61)                    |        |



**Supplementary Table 6:** Annual mortality rate in the total population, those with hypertension by treatment and control status and those without hypertension in Ethiopia in 2021 by age group and sex based on literature review of systematic reviews and clinical trials

| Age group    | Mortality rate in the total population | Mortality rate among people without hypertension | Mortality rate among people with treated and controlled hypertension | Mortality rate among people with treated but uncontrolled hypertension | Mortality rate among people with untreated hypertension | References                                                                      |
|--------------|----------------------------------------|--------------------------------------------------|----------------------------------------------------------------------|------------------------------------------------------------------------|---------------------------------------------------------|---------------------------------------------------------------------------------|
| <b>Women</b> |                                        |                                                  |                                                                      |                                                                        |                                                         |                                                                                 |
| 15-19        | 0.00222                                | 0.00222                                          | 0.016746                                                             | 0.025                                                                  | 0.02075                                                 | Ko, Min Jung, et al. 2016 (46), Mende Sorato, et al, 2021. (1, 23, 45, 47, 48). |
| 20-24        | 0.00223                                | 0.00223                                          | 0.016746                                                             | 0.025                                                                  | 0.02075                                                 |                                                                                 |
| 25-29        | 0.00232                                | 0.00232                                          | 0.016746                                                             | 0.025                                                                  | 0.02075                                                 |                                                                                 |
| 30-34        | 0.00368                                | 0.00368                                          | 0.016746                                                             | 0.025                                                                  | 0.02075                                                 |                                                                                 |
| 35-39        | 0.00222                                | 0.00222                                          | 0.016746                                                             | 0.025                                                                  | 0.02075                                                 |                                                                                 |
| 40-44        | 0.00385                                | 0.00385                                          | 0.016746                                                             | 0.025                                                                  | 0.02075                                                 |                                                                                 |
| 45-49        | 0.00457                                | 0.00457                                          | 0.016746                                                             | 0.025                                                                  | 0.02075                                                 |                                                                                 |
| 50-54        | 0.00182                                | 0.00182                                          | 0.016746                                                             | 0.025                                                                  | 0.02075                                                 |                                                                                 |
| 55-59        | 0.00182                                | 0.00182                                          | 0.016746                                                             | 0.025                                                                  | 0.02075                                                 |                                                                                 |
| 60 -64       | 0.00441                                | 0.00441                                          | 0.028414                                                             | 0.037                                                                  | 0.03471                                                 |                                                                                 |
| <b>Men</b>   |                                        |                                                  |                                                                      |                                                                        |                                                         |                                                                                 |
| 15-19        | 0.00286                                | 0.00286                                          | 0.018783                                                             | 0.025                                                                  | 0.01969                                                 | Kuriakose A. et al. 2014. (8), EDHS, 2016 (7, 45, 47-50)                        |
| 20-24        | 0.00319                                | 0.00319                                          | 0.018783                                                             | 0.025                                                                  | 0.01969                                                 |                                                                                 |
| 25-29        | 0.00293                                | 0.00293                                          | 0.018783                                                             | 0.025                                                                  | 0.01969                                                 |                                                                                 |
| 30-34        | 0.00397                                | 0.00397                                          | 0.018783                                                             | 0.025                                                                  | 0.01969                                                 |                                                                                 |
| 35-39        | 0.00411                                | 0.00411                                          | 0.018783                                                             | 0.025                                                                  | 0.01969                                                 |                                                                                 |
| 40-44        | 0.00584                                | 0.00584                                          | 0.018783                                                             | 0.025                                                                  | 0.01969                                                 |                                                                                 |
| 45-49        | 0.0036                                 | 0.0036                                           | 0.018783                                                             | 0.025                                                                  | 0.01969                                                 |                                                                                 |
| 50-54        | 0.00354                                | 0.00354                                          | 0.018783                                                             | 0.025                                                                  | 0.01969                                                 |                                                                                 |
| 55-59        | 0.00354                                | 0.00354                                          | 0.018783                                                             | 0.025                                                                  | 0.01969                                                 |                                                                                 |
| 60-64        | 0.00354                                | 0.00354                                          | 0.030451                                                             | 0.037                                                                  | 0.03365                                                 |                                                                                 |

## References

1. Sorato MM, Davari M, Kebriaeezadeh A, Sarrafzadegan N, Shibru T, Fatemi B. Risk of fatal and nonfatal coronary heart disease and stroke events among adult patients with hypertension: basic Markov model inputs for evaluating cost-effectiveness of hypertension treatment: systematic review of cohort studies. *Journal of Pharmaceutical Health Services Research*. 2021;12(2).
2. Institute. EPH. Ethiopia steps report on risk factors for chronic non-communicable diseases and prevalence of selected NCDs. 2016.
3. Kelemu Tilahun Kibret, Mesfin YM. Prevalence of hypertension in Ethiopia: a systematic meta-analysis. *Public Health Reviews* 2015;36(14).
4. WHO. Non-communicable diseases country profiles 2018. Geneva: World Health Organization. 2018.
5. Helelo TP GY, Adane AA. Prevalence and Associated Factors of Hypertension among Adults in Durame Town, Southern Ethiopia. *PLoS ONE*. 2014;9(11):e112790.
6. Shukuri A, Tewelde T, Shaweno T. Prevalence of old age hypertension and associated factors among older adults in rural Ethiopia. *Integrated blood pressure control*. 2019;12:23-31.
7. ICF C. Ethiopia Demographic and Health Survey 2016, Addis Ababa, Ethiopia, and Rockville, Maryland, USA: CSA and ICF. DF-1.6.
8. Kuriakose A, Nair Anish TS, Soman B, Varghese RT, Sreelal TP, Mendez AM, et al. Rate and Risk of All Cause Mortality among People with Known Hypertension in a Rural Community of Southern Kerala, India: The Results from the Prolife Cohort. *Int J Prev Med*. 2014;5(5):596-603.
9. Getachew F DA, Solomon D. Prevalence of Undiagnosed Hypertension and Associated Factors among Residents in Gulele Sub-City, Addis Ababa, Ethiopia. *J Community Med Health Educ*. 2018;8(590).
10. Antikainen R, Jousilahti P, Tuomilehto J. Systolic blood pressure, isolated systolic hypertension and risk of coronary heart disease, strokes, cardiovascular disease and all-cause mortality in the middle-aged population. *Journal of hypertension*. 1998;16(5):577-83.
11. Ford ES, Giles WH, Mokdad AH. The distribution of 10-year risk for coronary heart disease among US adults: findings from the National Health and Nutrition Examination Survey III. *Journal of the American College of Cardiology*. 2004;43(10):1791-6.
12. Collaborators GRF. Global, regional, and national comparative risk assessment of 84 behavioural, environmental and occupational, and metabolic risks or clusters of risks for 195 countries and territories, 1990–2017: a systematic analysis for the Global Burden of Disease Study 2017. *Lancet (London, England)*. 2018;392(10159):1923.
13. Flint AC, Conell C, Ren X, Banki NM, Chan SL, Rao VA, et al. Effect of systolic and diastolic blood pressure on cardiovascular outcomes. *New England Journal of Medicine*. 2019;381(3):243-51.
14. Rapsomaniki E, Timmis A, George J, Pujades-Rodriguez M, Shah AD, Denaxas S, et al. Blood pressure and incidence of twelve cardiovascular diseases: lifetime risks, healthy life-years lost, and age-specific associations in 1·25 million people. *The Lancet*. 2014;383(9932):1899-911.
15. Lloyd-Jones DM, Larson MG, Beiser A, Levy D. Lifetime risk of developing coronary heart disease. *The Lancet*. 1999;353(9147):89-92.
16. Organization WH. Disability weights, discounting and age weighting of DALYs. Available; 2016.
17. Salomon JA, Haagsma JA, Davis A, de Noordhout CM, Polinder S, Havelaar AH, et al. Disability weights for the Global Burden of Disease 2013 study. *The Lancet Global Health*. 2015;3(11):e712-e23.
18. Vos T, Allen C, Arora M, Barber RM, Bhutta ZA, Brown A, et al. Global, regional, and national incidence, prevalence, and years lived with disability for 310 diseases and injuries, 1990–2015: a systematic analysis for the Global Burden of Disease Study 2015. *The Lancet*. 2016;388(10053):1545-602.
19. Salomon JA, Vos T, Hogan DR, Gagnon M, Naghavi M, Mokdad A, et al. Common values in assessing health outcomes from disease and injury: disability weights measurement study for the Global Burden of Disease Study 2010. *Lancet (London, England)*. 2012;380(9859):2129-43.
20. Lin JK, Moran AE, Bibbins-Domingo K, Falase B, Pedroza Tobias A, Mandke CN, et al. Cost-effectiveness of a fixed-dose combination pill for secondary prevention of cardiovascular disease in China, India, Mexico, Nigeria, and South Africa: a modelling study. *The Lancet Global health*. 2019;7(10):e1346-e58.

21. Global, regional, and national age-sex-specific mortality for 282 causes of death in 195 countries and territories, 1980-2017: a systematic analysis for the Global Burden of Disease Study 2017. *Lancet* (London, England). 2018;392(10159):1736-88.
22. Huffman MD, Mohanan PP, Devarajan R, Baldrige AS, Kondal D, Zhao L, et al. Effect of a Quality Improvement Intervention on Clinical Outcomes in Patients in India With Acute Myocardial Infarction: The ACS QUIK Randomized Clinical Trial. *Jama*. 2018;319(6):567-78.
23. Bundy JD, Li C, Stuchlik P, Bu X, Kelly TN, Mills KT, et al. Systolic Blood Pressure Reduction and Risk of Cardiovascular Disease and Mortality: A Systematic Review and Network Meta-analysis. *JAMA Cardiology*. 2017;2(7):775-81.
24. Petty GW, Brown RD, Jr., Whisnant JP, Sicks JD, O'Fallon WM, Wiebers DO. Survival and recurrence after first cerebral infarction: a population-based study in Rochester, Minnesota, 1975 through 1989. *Neurology*. 1998;50(1):208-16.
25. Health MSf. International Medical Products Price Guide: 2015 edition. 2015.
26. Lee SE, Lee HY, Cho HJ, Choe WS, Kim H, Choi JO, et al. Clinical Characteristics and Outcome of Acute Heart Failure in Korea: Results from the Korean Acute Heart Failure Registry (KorAHF). *Korean circulation journal*. 2017;47(3):341-53.
27. Choi DJ, Han S, Jeon ES, Cho MC, Kim JJ, Yoo BS, et al. Characteristics, outcomes and predictors of long-term mortality for patients hospitalized for acute heart failure: a report from the Korean heart failure registry. *Korean circulation journal*. 2011;41(7):363-71.
28. Steg PG, Bhatt DL, Wilson PWF, D'Agostino R, Ohman EM, Röther J, et al. One-Year Cardiovascular Event Rates in Outpatients With Atherothrombosis. *Jama*. 2007;297(11):1197-206.
29. Robinson TG, Potter JF, Ford GA, Bulpitt CJ, Chernova J, Jagger C, et al. Effects of antihypertensive treatment after acute stroke in the Continue Or Stop post-Stroke Antihypertensives Collaborative Study (COSSACS): a prospective, randomised, open, blinded-endpoint trial. *The Lancet Neurology*. 2010;9(8):767-75.
30. Katsanos AH, Filippatou A, Manios E, Deftereos S, Parissis J, Frogoudaki A, et al. Blood Pressure Reduction and Secondary Stroke Prevention. *Hypertension*. 2017;69(1):171-9.
31. Yasui D, Asayama K, Ohkubo T, Kikuya M, Kanno A, Hara A, et al. Stroke Risk in Treated Hypertension Based on Home Blood Pressure: the Ohasama Study. *American Journal of Hypertension*. 2010;23(5):508-14.
32. Smolina K, Wright FL, Rayner M, Goldacre MJ. Long-Term Survival and Recurrence After Acute Myocardial Infarction in England, 2004 to 2010. *Circulation: Cardiovascular Quality and Outcomes*. 2012;5(4):532-40.
33. Butler J, Kalogeropoulos AP, Georgiopoulou VV, Bibbins-Domingo K, Najjar SS, Sutton-Tyrrell KC, et al. Systolic blood pressure and incident heart failure in the elderly. The Cardiovascular Health Study and the Health, Ageing and Body Composition Study. *Heart*. 2011;97(16):1304.
34. Piller LB, Baraniuk S, Simpson LM, Cushman WC, Massie BM, Einhorn PT, et al. Long-term follow-up of participants with heart failure in the antihypertensive and lipid-lowering treatment to prevent heart attack trial (ALLHAT). *Circulation*. 2011;124(17):1811-8.
35. Davis BR, Kostis JB, Simpson LM, Black HR, Cushman WC, Einhorn PT, et al. Heart Failure With Preserved and Reduced Left Ventricular Ejection Fraction in the Antihypertensive and Lipid-Lowering Treatment to Prevent Heart Attack Trial. *Circulation*. 2008;118(22):2259-67.
36. Moita B, Marques AP, Camacho AM, Leão Neves P, Santana R. One-year rehospitalisations for congestive heart failure in Portuguese NHS hospitals: a multilevel approach on patterns of use and contributing factors. *BMJ open*. 2019;9(9):e031346.
37. Chamberlain AM, Dunlay SM, Gerber Y, Manemann SM, Jiang R, Weston SA, et al. Burden and Timing of Hospitalizations in Heart Failure: A Community Study. *Mayo Clinic proceedings*. 2017;92(2):184-92.
38. Law MR, Morris JK, Wald NJ. Use of blood pressure lowering drugs in the prevention of cardiovascular disease: meta-analysis of 147 randomised trials in the context of expectations from prospective epidemiological studies. *BMJ (Clinical research ed)*. 2009;338:b1665.
39. Asayama K. Observational study and participant-level meta-analysis on antihypertensive drug treatment-related cardiovascular risk. *Hypertension Research*. 2017;40(10):856-60.

- 1  
2  
3 40. Cherry SB, Benner JS, Hussein MA, Tang SSK, Nichol MB. The Clinical and Economic Burden of  
4 Nonadherence with Antihypertensive and Lipid-Lowering Therapy in Hypertensive Patients. *Value in Health*.  
5 2009;12(4):489-97.
- 6 41. Liu L, Wang Z, Gong L, Zhang Y, Thijs L, Staessen JA, et al. Blood pressure reduction for the  
7 secondary prevention of stroke: a Chinese trial and a systematic review of the literature. *Hypertension Research*.  
8 2009;32(11):1032-40.
- 9 42. Stenberg K, Lauer JA, Gkoutouras G, Fitzpatrick C, Stanciole A. Econometric estimation of WHO-  
10 CHOICE country-specific costs for inpatient and outpatient health service delivery. *Cost Effectiveness and*  
11 *Resource Allocation*. 2018;16(1):11.
- 12 43. Health FMO. National strategic action plan (NSAP) for prevention & control of non-communicable  
13 diseases in Ethiopia, 2014-2016. 2014:43-7.
- 14 44. Organization WH. WHO-CHOICE Estimates of Cost for Inpatient and Outpatient Health Service  
15 Delivery.
- 16 45. Zhou D, Xi B, Zhao M, Wang L, Veeranki SP. Uncontrolled hypertension increases risk of all-cause  
17 and cardiovascular disease mortality in US adults: the NHANES III Linked Mortality Study. *Sci Rep*.  
18 2018;8(1):9418.
- 19 46. Ko MJ, Jo AJ, Park CM, Kim HJ, Kim YJ, Park D-W. Level of blood pressure control and  
20 cardiovascular events: SPRINT criteria versus the 2014 hypertension recommendations. *Journal of the*  
21 *American College of Cardiology*. 2016;67(24):2821-31.
- 22 47. Gu Q, Dillon CF, Burt VL, Gillum RF. Association of Hypertension Treatment and Control With All-  
23 Cause and Cardiovascular Disease Mortality Among US Adults With Hypertension. *American Journal of*  
24 *Hypertension*. 2010;23(1):38-45.
- 25 48. Murakami Y, Hozawa A, Okamura T, Ueshima H. Relation of Blood Pressure and All-Cause Mortality  
26 in 180 000 Japanese Participants. *Hypertension*. 2008;51(6):1483-91.
- 27 49. Nagai K, Yamagata K, Iseki K, Moriyama T, Tsuruya K, Fujimoto S, et al. Antihypertensive treatment  
28 and risk of cardiovascular mortality in patients with chronic kidney disease diagnosed based on the presence of  
29 proteinuria and renal function: A large longitudinal study in Japan. *PLoS One*. 2019;14(12):e0225812.
- 30 50. Gudmundsson LS, Johannsson M, Thorgeirsson G, Sigfusson N, Sigvaldason H, Wittelman JCM. Risk  
31 profiles and prognosis of treated and untreated hypertensive men and women in a population-based  
32 longitudinal study The Reykjavik Study. *Journal of Human Hypertension*. 2004;18(9):615-22.
- 33  
34  
35  
36  
37  
38  
39  
40  
41  
42  
43  
44  
45  
46  
47  
48  
49  
50  
51  
52  
53  
54  
55  
56  
57  
58  
59  
60

# Reporting checklist for economic evaluation of health interventions.

Based on the CHEERS guidelines.

## Instructions to authors

Complete this checklist by entering the page numbers from your manuscript where readers will find each of the items listed below.

Your article may not currently address all the items on the checklist. Please modify your text to include the missing information. If you are certain that an item does not apply, please write "n/a" and provide a short explanation.

Upload your completed checklist as an extra file when you submit to a journal.

In your methods section, say that you used the CHEERS reporting guidelines, and cite them as:

Husereau D, Drummond M, Petrou S, Carswell C, Moher D, Greenberg D, Augustovski F, Briggs AH, Mauskopf J, Loder E. Consolidated Health Economic Evaluation Reporting Standards (CHEERS) statement.

| Title | Reporting Item                                                                                                                                          | Page Number |
|-------|---------------------------------------------------------------------------------------------------------------------------------------------------------|-------------|
| #1    | Identify the study as an economic evaluation or use more specific terms such as “cost-effectiveness analysis”, and describe the interventions compared. | 1           |

## Abstract

|                    |                                                                                                                                                                                        |   |
|--------------------|----------------------------------------------------------------------------------------------------------------------------------------------------------------------------------------|---|
| <a href="#">#2</a> | Provide a structured summary of objectives, perspective, setting, methods (including study design and inputs), results (including base case and uncertainty analyses), and conclusions | 1 |
|--------------------|----------------------------------------------------------------------------------------------------------------------------------------------------------------------------------------|---|

## Introduction

|                    |                                                                                                                                                          |   |
|--------------------|----------------------------------------------------------------------------------------------------------------------------------------------------------|---|
| <a href="#">#3</a> | Provide an explicit statement of the broader context for the study. Present the study question and its relevance for health policy or practice decisions | 2 |
|--------------------|----------------------------------------------------------------------------------------------------------------------------------------------------------|---|

## Methods

|                    |                                                                                                              |      |
|--------------------|--------------------------------------------------------------------------------------------------------------|------|
| <a href="#">#4</a> | Describe characteristics of the base case population and subgroups analysed, including why they were chosen. | 3    |
| <a href="#">#5</a> | State relevant aspects of the system(s) in which the decision(s) need(s) to be made.                         | 3    |
| <a href="#">#6</a> | Describe the perspective of the study and relate this to the costs being evaluated.                          | 3-10 |
| <a href="#">#7</a> | Describe the interventions or strategies being compared and state why they were chosen.                      | 9    |

|    |                        |                     |                                                      |     |
|----|------------------------|---------------------|------------------------------------------------------|-----|
| 1  | Time horizon           | <a href="#">#8</a>  | State the time horizon(s) over which costs and       | 2   |
| 2  |                        |                     |                                                      |     |
| 3  |                        |                     |                                                      |     |
| 4  |                        |                     | consequences are being evaluated and say why         |     |
| 5  |                        |                     |                                                      |     |
| 6  |                        |                     | appropriate.                                         |     |
| 7  |                        |                     |                                                      |     |
| 8  |                        |                     |                                                      |     |
| 9  | Discount rate          | <a href="#">#9</a>  | Report the choice of discount rate(s) used for costs | 10  |
| 10 |                        |                     |                                                      |     |
| 11 |                        |                     | and outcomes and say why appropriate                 |     |
| 12 |                        |                     |                                                      |     |
| 13 |                        |                     |                                                      |     |
| 14 | Choice of health       | <a href="#">#10</a> | Describe what outcomes were used as the              | NA  |
| 15 |                        |                     |                                                      |     |
| 16 | outcomes               |                     | measure(s) of benefit in the evaluation and their    |     |
| 17 |                        |                     |                                                      |     |
| 18 |                        |                     | relevance for the type of analysis performed         |     |
| 19 |                        |                     |                                                      |     |
| 20 |                        |                     |                                                      |     |
| 21 |                        |                     |                                                      |     |
| 22 | Measurement of         | <a href="#">#11</a> | Single study-based estimates: Describe fully the     | 4-6 |
| 23 |                        |                     |                                                      |     |
| 24 | effectiveness          | <a href="#">a</a>   | design features of the single effectiveness study    |     |
| 25 |                        |                     |                                                      |     |
| 26 |                        |                     | and why the single study was a sufficient source of  |     |
| 27 |                        |                     |                                                      |     |
| 28 |                        |                     | clinical effectiveness data                          |     |
| 29 |                        |                     |                                                      |     |
| 30 |                        |                     |                                                      |     |
| 31 |                        |                     |                                                      |     |
| 32 | Measurement of         | <a href="#">#11</a> | Synthesis-based estimates: Describe fully the        | NA  |
| 33 |                        |                     |                                                      |     |
| 34 | effectiveness          | <a href="#">b</a>   | methods used for identification of included studies  |     |
| 35 |                        |                     |                                                      |     |
| 36 |                        |                     | and synthesis of clinical effectiveness data         |     |
| 37 |                        |                     |                                                      |     |
| 38 |                        |                     |                                                      |     |
| 39 | Measurement and        | <a href="#">#12</a> | If applicable, describe the population and methods   | NA  |
| 40 |                        |                     |                                                      |     |
| 41 | valuation of           |                     | used to elicit preferences for outcomes.             |     |
| 42 |                        |                     |                                                      |     |
| 43 |                        |                     |                                                      |     |
| 44 | preference based       |                     |                                                      |     |
| 45 |                        |                     |                                                      |     |
| 46 | outcomes               |                     |                                                      |     |
| 47 |                        |                     |                                                      |     |
| 48 |                        |                     |                                                      |     |
| 49 | **Estimating resources |                     |                                                      |     |
| 50 |                        |                     |                                                      |     |
| 51 |                        |                     |                                                      |     |
| 52 | and costs **           |                     |                                                      |     |
| 53 |                        |                     |                                                      |     |
| 54 |                        |                     |                                                      |     |
| 55 |                        | <a href="#">#13</a> | Single study-based economic evaluation: Describe     | NA  |
| 56 |                        |                     |                                                      |     |
| 57 |                        |                     |                                                      |     |
| 58 |                        | <a href="#">a</a>   | approaches used to estimate resource use             |     |
| 59 |                        |                     |                                                      |     |
| 60 |                        |                     |                                                      |     |



associated with the alternative interventions.

Describe primary or secondary research methods for valuing each resource item in terms of its unit cost. Describe any adjustments made to approximate to opportunity costs

## Methods

|    |                       |                     |                                                                                                                                                                                                                                                                                                                      |                        |
|----|-----------------------|---------------------|----------------------------------------------------------------------------------------------------------------------------------------------------------------------------------------------------------------------------------------------------------------------------------------------------------------------|------------------------|
| 16 | Estimating resources  | <a href="#">#13</a> | Model-based economic evaluation: Describe approaches and data sources used to estimate resource use associated with model health states. Describe primary or secondary research methods for valuing each resource item in terms of its unit cost. Describe any adjustments made to approximate to opportunity costs. | 6-9                    |
| 17 | and costs             | <a href="#">b</a>   |                                                                                                                                                                                                                                                                                                                      |                        |
| 32 | Currency, price date, | <a href="#">#14</a> | Report the dates of the estimated resource quantities and unit costs. Describe methods for adjusting estimated unit costs to the year of reported costs if necessary. Describe methods for converting costs into a common currency base and the exchange rate.                                                       | 9                      |
| 33 | and conversion        |                     |                                                                                                                                                                                                                                                                                                                      |                        |
| 47 | Choice of model       | <a href="#">#15</a> | Describe and give reasons for the specific type of decision analytical model used. Providing a figure to show model structure is strongly recommended.                                                                                                                                                               | Supplementary figure 1 |
| 54 | Assumptions           | <a href="#">#16</a> | Describe all structural or other assumptions underpinning the decision-analytical model.                                                                                                                                                                                                                             | 9                      |

|    |                    |                     |                                                      |    |
|----|--------------------|---------------------|------------------------------------------------------|----|
| 1  | Analytical methods | <a href="#">#17</a> | Describe all analytical methods supporting the       | 9  |
| 2  |                    |                     | evaluation. This could include methods for dealing   |    |
| 3  |                    |                     | with skewed, missing, or censored data;              |    |
| 4  |                    |                     | extrapolation methods; methods for pooling data;     |    |
| 5  |                    |                     | approaches to validate or make adjustments (such     |    |
| 6  |                    |                     | as half cycle corrections) to a model; and methods   |    |
| 7  |                    |                     | for handling population heterogeneity and            |    |
| 8  |                    |                     | uncertainty.                                         |    |
| 9  |                    |                     |                                                      |    |
| 10 |                    |                     |                                                      |    |
| 11 |                    |                     |                                                      |    |
| 12 |                    |                     |                                                      |    |
| 13 |                    |                     |                                                      |    |
| 14 |                    |                     |                                                      |    |
| 15 |                    |                     |                                                      |    |
| 16 |                    |                     |                                                      |    |
| 17 |                    |                     |                                                      |    |
| 18 |                    |                     |                                                      |    |
| 19 |                    |                     |                                                      |    |
| 20 | <b>Results</b>     |                     |                                                      |    |
| 21 |                    |                     |                                                      |    |
| 22 |                    |                     |                                                      |    |
| 23 | Study parameters   | <a href="#">#18</a> | Report the values, ranges, references, and, if used, | 11 |
| 24 |                    |                     | probability distributions for all parameters. Report |    |
| 25 |                    |                     | reasons or sources for distributions used to         |    |
| 26 |                    |                     | represent uncertainty where appropriate. Providing   |    |
| 27 |                    |                     | a table to show the input values is strongly         |    |
| 28 |                    |                     | recommended.                                         |    |
| 29 |                    |                     |                                                      |    |
| 30 |                    |                     |                                                      |    |
| 31 |                    |                     |                                                      |    |
| 32 |                    |                     |                                                      |    |
| 33 |                    |                     |                                                      |    |
| 34 |                    |                     |                                                      |    |
| 35 |                    |                     |                                                      |    |
| 36 |                    |                     |                                                      |    |
| 37 |                    |                     |                                                      |    |
| 38 | Incremental costs  | <a href="#">#19</a> | For each intervention, report mean values for the    | 11 |
| 39 |                    |                     | main categories of estimated costs and outcomes      |    |
| 40 | and outcomes       |                     | of interest, as well as mean differences between     |    |
| 41 |                    |                     | the comparator groups. If applicable, report         |    |
| 42 |                    |                     | incremental cost-effectiveness ratios.               |    |
| 43 |                    |                     |                                                      |    |
| 44 |                    |                     |                                                      |    |
| 45 |                    |                     |                                                      |    |
| 46 |                    |                     |                                                      |    |
| 47 |                    |                     |                                                      |    |
| 48 |                    |                     |                                                      |    |
| 49 |                    |                     |                                                      |    |
| 50 | Characterising     | <a href="#">#20</a> | Single study-based economic evaluation: Describe     | NA |
| 51 |                    |                     | the effects of sampling uncertainty for the          |    |
| 52 | uncertainty        | <a href="#">a</a>   | estimated incremental cost and incremental           |    |
| 53 |                    |                     | effectiveness parameters, together with the impact   |    |
| 54 |                    |                     |                                                      |    |
| 55 |                    |                     |                                                      |    |
| 56 |                    |                     |                                                      |    |
| 57 |                    |                     |                                                      |    |
| 58 |                    |                     |                                                      |    |
| 59 |                    |                     |                                                      |    |
| 60 |                    |                     |                                                      |    |

of methodological assumptions (such as discount rate, study perspective).

|    |                       |                     |                                                       |
|----|-----------------------|---------------------|-------------------------------------------------------|
| 1  |                       |                     |                                                       |
| 2  |                       |                     |                                                       |
| 3  |                       |                     |                                                       |
| 4  |                       |                     |                                                       |
| 5  |                       |                     |                                                       |
| 6  | Characterising        | <a href="#">#20</a> | Model-based economic evaluation: Describe the         |
| 7  |                       |                     |                                                       |
| 8  | uncertainty           | <a href="#">b</a>   | effects on the results of uncertainty for all input   |
| 9  |                       |                     |                                                       |
| 10 |                       |                     | parameters, and uncertainty related to the structure  |
| 11 |                       |                     |                                                       |
| 12 |                       |                     | of the model and assumptions.                         |
| 13 |                       |                     |                                                       |
| 14 |                       |                     |                                                       |
| 15 | Characterising        | <a href="#">#21</a> | If applicable, report differences in costs, outcomes, |
| 16 |                       |                     |                                                       |
| 17 | heterogeneity         |                     | or cost effectiveness that can be explained by        |
| 18 |                       |                     |                                                       |
| 19 |                       |                     | variations between subgroups of patients with         |
| 20 |                       |                     |                                                       |
| 21 |                       |                     | different baseline characteristics or other observed  |
| 22 |                       |                     |                                                       |
| 23 |                       |                     | variability in effects that are not reducible by more |
| 24 |                       |                     |                                                       |
| 25 |                       |                     | information.                                          |
| 26 |                       |                     |                                                       |
| 27 |                       |                     |                                                       |
| 28 |                       |                     |                                                       |
| 29 |                       |                     |                                                       |
| 30 | <b>Discussion</b>     |                     |                                                       |
| 31 |                       |                     |                                                       |
| 32 |                       |                     |                                                       |
| 33 | Study findings,       | <a href="#">#22</a> | Summarise key study findings and describe how         |
| 34 |                       |                     |                                                       |
| 35 | limitations,          |                     | they support the conclusions reached. Discuss         |
| 36 |                       |                     |                                                       |
| 37 | generalisability, and |                     | limitations and the generalisability of the findings  |
| 38 |                       |                     |                                                       |
| 39 | current knowledge     |                     | and how the findings fit with current knowledge.      |
| 40 |                       |                     |                                                       |
| 41 |                       |                     |                                                       |
| 42 |                       |                     |                                                       |
| 43 | <b>Other</b>          |                     |                                                       |
| 44 |                       |                     |                                                       |
| 45 |                       |                     |                                                       |
| 46 | Source of funding     | <a href="#">#23</a> | Describe how the study was funded and the role of     |
| 47 |                       |                     |                                                       |
| 48 |                       |                     | the funder in the identification, design, conduct,    |
| 49 |                       |                     |                                                       |
| 50 |                       |                     | and reporting of the analysis. Describe other non-    |
| 51 |                       |                     |                                                       |
| 52 |                       |                     | monetary sources of support                           |
| 53 |                       |                     |                                                       |
| 54 |                       |                     |                                                       |
| 55 |                       |                     |                                                       |
| 56 |                       |                     |                                                       |
| 57 |                       |                     |                                                       |
| 58 |                       |                     |                                                       |
| 59 |                       |                     |                                                       |
| 60 |                       |                     |                                                       |

1 Conflict of interest [#24](#) Describe any potential for conflict of interest of 23  
2  
3 study contributors in accordance with journal  
4 policy. In the absence of a journal policy, we  
5 recommend authors comply with International  
6 Committee of Medical Journal Editors  
7 recommendations  
8  
9  
10  
11  
12  
13  
14  
15

16 Notes:

- 17  
18  
19 • 15: Supplementary figure 1 The CHEERS checklist is distributed under the terms of the Creative  
20 Commons Attribution License CC-BY-NC. This checklist was completed on 20. August 2021  
21 using <https://www.goodreports.org/>, a tool made by the [EQUATOR Network](#) in collaboration with  
22 [Penelope.ai](#)  
23  
24  
25  
26  
27  
28  
29  
30  
31  
32  
33  
34  
35  
36  
37  
38  
39  
40  
41  
42  
43  
44  
45  
46  
47  
48  
49  
50  
51  
52  
53  
54  
55  
56  
57  
58  
59  
60

# BMJ Open

## Societal economic burden of hypertension at selected hospitals in southern Ethiopia; a patient-level analysis

|                                 |                                                                                                                                                                                                                                                                                                                                                                                                                                                                                                                                                                                                                                                                                                                      |
|---------------------------------|----------------------------------------------------------------------------------------------------------------------------------------------------------------------------------------------------------------------------------------------------------------------------------------------------------------------------------------------------------------------------------------------------------------------------------------------------------------------------------------------------------------------------------------------------------------------------------------------------------------------------------------------------------------------------------------------------------------------|
| Journal:                        | <i>BMJ Open</i>                                                                                                                                                                                                                                                                                                                                                                                                                                                                                                                                                                                                                                                                                                      |
| Manuscript ID                   | bmjopen-2021-056627.R2                                                                                                                                                                                                                                                                                                                                                                                                                                                                                                                                                                                                                                                                                               |
| Article Type:                   | Original research                                                                                                                                                                                                                                                                                                                                                                                                                                                                                                                                                                                                                                                                                                    |
| Date Submitted by the Author:   | 01-Mar-2022                                                                                                                                                                                                                                                                                                                                                                                                                                                                                                                                                                                                                                                                                                          |
| Complete List of Authors:       | Sorato, Mende; Arba Minch University, Pharmacy; Tehran University of Medical Sciences School of Pharmacy, Pharmacoeconomics and Pharmaceutical administration<br>Davari, Majid; Tehran University of Medical Sciences, Pharmacoeconomics and Pharmaceutical Management<br>Kebriaeezadeh, Abbas; Tehran University of Medical Sciences School of Pharmacy, Pharmacoeconomics and Pharmaceutical Management<br>Sarrafzadegan, Nizal; Isfahan University of Medical Sciences, Isfahan Cardiovascular Research Center; University of British Columbia, School of Population and Public Health, Faculty of Medicine<br>Shibru, Tamiru; Arba Minch University, School of Medicine, College of Medicine and Health Sciences |
| <b>Primary Subject Heading</b>: | Health economics                                                                                                                                                                                                                                                                                                                                                                                                                                                                                                                                                                                                                                                                                                     |
| Secondary Subject Heading:      | Cardiovascular medicine, Health services research, Public health, Health policy                                                                                                                                                                                                                                                                                                                                                                                                                                                                                                                                                                                                                                      |
| Keywords:                       | Health economics < HEALTH SERVICES ADMINISTRATION & MANAGEMENT, HEALTH ECONOMICS, Cardiology < INTERNAL MEDICINE, Hypertension < CARDIOLOGY                                                                                                                                                                                                                                                                                                                                                                                                                                                                                                                                                                          |
|                                 |                                                                                                                                                                                                                                                                                                                                                                                                                                                                                                                                                                                                                                                                                                                      |

SCHOLARONE™  
Manuscripts

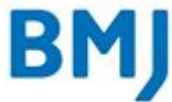

I, the Submitting Author has the right to grant and does grant on behalf of all authors of the Work (as defined in the below author licence), an exclusive licence and/or a non-exclusive licence for contributions from authors who are: i) UK Crown employees; ii) where BMJ has agreed a CC-BY licence shall apply, and/or iii) in accordance with the terms applicable for US Federal Government officers or employees acting as part of their official duties; on a worldwide, perpetual, irrevocable, royalty-free basis to BMJ Publishing Group Ltd ("BMJ") its licensees and where the relevant Journal is co-owned by BMJ to the co-owners of the Journal, to publish the Work in this journal and any other BMJ products and to exploit all rights, as set out in our [licence](#).

The Submitting Author accepts and understands that any supply made under these terms is made by BMJ to the Submitting Author unless you are acting as an employee on behalf of your employer or a postgraduate student of an affiliated institution which is paying any applicable article publishing charge ("APC") for Open Access articles. Where the Submitting Author wishes to make the Work available on an Open Access basis (and intends to pay the relevant APC), the terms of reuse of such Open Access shall be governed by a Creative Commons licence – details of these licences and which [Creative Commons](#) licence will apply to this Work are set out in our licence referred to above.

Other than as permitted in any relevant BMJ Author's Self Archiving Policies, I confirm this Work has not been accepted for publication elsewhere, is not being considered for publication elsewhere and does not duplicate material already published. I confirm all authors consent to publication of this Work and authorise the granting of this licence.

# Societal economic burden of hypertension at selected hospitals in southern Ethiopia; a patient-level analysis

## Authors:

### 1. Mende Mensa Sorato\* (B.Pharm, MSc. PhD Candidate)

**Address:** Department of Pharmacy, Arba Minch University and Faculty of Pharmacy, Department of Pharmacoeconomics and pharmaceutical Administration.

Tehran University of Medical Sciences

Gmail: [mendemensa@gmail.com](mailto:mendemensa@gmail.com)

**ORCID:** [0000-0002-6342-0980](https://orcid.org/0000-0002-6342-0980)

Mobile: +98-9056309138

P.O. Box: 21

**Mailing Address:** Arba Minch Ethiopia

### 2. Dr. Majid Davari (PharmD, PhD in Health/Pharmacoeconomics)

Email: [M-davari@tums.ac.ir](mailto:M-davari@tums.ac.ir)

Mobile: [+98-9134128963](tel:+98-9134128963)

Address: Tehran University of Medical Sciences, Faculty of Pharmacy, Department of Pharmacoeconomics and pharmaceutical Administration

### 3. Dr. Abbas Kebriaeezadeh (PharmD, PhD in Pharmacology)

Email: [kebriace@tums.ac.ir](mailto:kebriace@tums.ac.ir)

Mobile: [+98-9122052460](tel:+98-9122052460)

**Address:** Tehran University of Medical Sciences, Faculty of Pharmacy, Department of Pharmacoeconomics and pharmaceutical Administration.

### 4. Dr. Nizal Sarrafzadegan ( MTMD MPH, MD)

Email: [nsarrafzadegan@gmail.com](mailto:nsarrafzadegan@gmail.com)

**Address:** Director of Isfahan Cardiovascular Research Center, WHO Collaborating Center in EMR, Isfahan University of Medical Sciences

### 5. Dr. Tamiru Shibru (Internist)

Tel (cell): +251-911-70-47-67

Email: [drtamshib1@gmail.com](mailto:drtamshib1@gmail.com)

**Address:** Arba Minch University, *College of medicine and health sciences*

\* Corresponding Author

**Word Count:** 5546

**Number of references:** 74

**Abstract Count:** 296

**Key Words:** Hypertension; Economic burden of Hypertension; Cost of Illness study; Southern Ethiopia



## I. Abstract

**Objectives:** There is inadequate information on the economic burden of hypertension treatment in Ethiopia. Therefore, this study was conducted to determine the societal economic burden of hypertension at Selected Hospitals in Southern Ethiopia.

**Methods:** Prevalence-based cost of illness (COI) study from a societal perspective was conducted. Disability-adjusted life years (DALYs) were determined by the current world health organization's recommended DALY valuation method. Adjustment for comorbidity and a 3% discount was done for DALYs. The data entry, processing, and analysis were done by using SPSS version 21.0 and Microsoft Excel 2013.

**Results:** We followed a cohort of 406 adult hypertensive patients retrospectively for 10 years from September 2010 to 2020. Two hundred-fifty (61.6%) of patients were females with a mean age of  $55.87 \pm 11.03$  years. Less than 1 in five 75 (18.5%) of patients achieved their blood pressure control target. A total of 64,837.48 United States Dollar (\$US) direct cost was incurred due to hypertension. A total of 11,585 years and 579.57 years were lost due to hypertension-related premature mortality and morbidity respectively. Treated and uncontrolled hypertension accounted for 50.83% (6027) of total years lost due to premature mortality from treated hypertension cohort. Total productivity loss due to premature mortality and morbidity was \$US 449,394.69. The overall economic burden of hypertension was \$US 514,232.16 (\$ US 105.55 per person per month)

**Conclusion:** Societal economic burden of hypertension in Southern Ethiopia was substantial. Indirect costs accounted for more than eight out of 10 dollars. Treated and uncontrolled hypertension took the lion's share of economic cost and productivity loss due to premature mortality and morbidity. Therefore, designing and implanting strategies for the prevention of hypertension, early screening, and detection, and improving the rate of blood pressure control by involving all relevant stakeholders at all levels is critical to saving scarce health resources.

### Strengths and limitations of this study

- Using the cardiovascular disease policy model adapted to Sub-Saharan African perspective,
- Including productivity loss costs associated with hypertension (premature mortality and morbidity) and
- Obtaining all simulation variables and transition probability data from valid sources (systematic reviews, randomized controlled trials, and prospective cohort studies) were the strengths of this study
- Uncertainty in age and sex-specific prevalence of undiagnosed hypertension and variability in employment rate which require due consideration during applying the findings of this study were limitations.

## 1. Introduction

Hypertension doubles the risk of death from stroke, heart disease, vascular diseases, diabetes, atherosclerosis, and kidney disease (1). According to the national STEPS survey, only 28.4% of hypertensive patients were taking antihypertensive medication prescribed by professionals in Ethiopia (2). According to the International Society of hypertension global hypertension practice guideline 2020, hypertension remains the leading cause of death globally, accounting for 10.4 million deaths per year (3).

Hypertension is associated with societal and economic consequences particularly in Low and middle-income countries (LMICs). In addition to the direct costs associated with health care utilization for the management of complications, hypertension causes significant productivity loss from disability and premature death (4, 5). WHO report from South East Asian region also indicated huge impact of hypertension in national finances due to premature death, disability, personal and family disruption, loss of income, and healthcare expenditure (6). According to a WHO report in 2017, stroke, coronary heart disease, and hypertension caused 39,571, 46,943, and 11,050 deaths respectively (i.e. 30 patients per day die due hypertension) in Ethiopia (7).

Cost of illness (COI) study is used to measure the economic burden of disease to individuals, communities, and society as a whole. It can provide information to support the political process and healthcare decision-making if it is conducted from a societal perspective by using an appropriate approach and bottom-up costing strategy (8-10) (11, 12). Despite this huge impact on national economies, the economic burden of hypertension is not studied in Ethiopia particularly Southern Ethiopia. To fill this evidence gap, this study was conducted to determine the economic burden of hypertension at selected public hospitals in Southern Ethiopia by using the prevalence-based cost-of-illness method from a societal perspective to estimate the direct and indirect costs of hypertension in a given year (2021) in Southern Ethiopia.

## 2. Methods and Materials

### 2.1. Study design, Area and Period

A prevalence-based retrospective cost of illness study from societal perspective focusing on quantifying direct and indirect costs was conducted from September 2010- September 2020 in at three selected public hospitals Southern Ethiopia. The bottom-up approach was used to estimate the economic burden of hypertension in Southern Ethiopia (figure 1). The human capital approach was used to calculate indirect costs separately in males and females and also among different age groups. A prevalence-based COI model was constructed in which hypertensive patients were simulated from diagnosis through active treatment, palliative care, and death over 15-64 years. Age and sex-specific mortality rates, measures of productivity, and workforce statistics were used to simulate the progression of these cohorts until death or age 64 years. First, the model estimated cumulative years of life and DALYs lived for the working-age population who had hypertension. Then the

1  
2  
3 model re-simulated with the hypothetical assumption that they did not have hypertension, with relevant changes  
4 to mortality rates and productivity. We estimated the probability of death separately for (1) all-cause mortality  
5 in absence of hypertension and related complications and (2) mortality attributable to the included disease  
6 states. The first component was estimated using WHO Life Tables, and the second component was calculated  
7 based on standardized mortality ratios extracted from the literature. The natural history study conducted in  
8 1974 showed that the mortality rate was 1.85 (3.01 in males and 1.62 in females) (13). Interventional trials  
9 suggested that it could be possible to achieve effective BP targets in about 70% of patients by improving  
10 adherence and/or intensifying therapy (14).  
11  
12  
13  
14  
15

## 16 17 **2.2. Study populations**

18  
19 The study populations were selected adult hypertensive patients at three selected public hospitals. According  
20 to the world population prospect 2020 estimate (15). In the same year, the population of the Gamo zone  
21 accounted for 1.5% of the total population, Gofa, and South Omo Zone 1.5% of the total population. The  
22 target population is 3.0% total population of Ethiopia or 20% of the Southern Ethiopian population  
23 (6,208,034). Based on age distribution: 0-14 years are children, 15-24 years are early working age, 25-54 years  
24 are prime working age, 55-64 years are mature working age and  $\geq 65$  years are elderly (13).  
25  
26  
27  
28

## 29 30 **2.3. Inclusion and exclusion criteria**

31  
32 We included all adult hypertensive patients having at least five years of follow-up visits before data collection  
33 and receiving care during the study period from selected facilities. However, patients who are unwilling to  
34 participate in this study, patients who have less than five years of follow-up, and incomplete patient records  
35 (don't contain follow-up BP records and refill medications, laboratory requests, and results) were excluded.  
36  
37  
38

## 39 40 **2.4. Study Variables**

### 41 42 **Dependent Variables**

- 43 • Economic burden of hypertension

### 44 45 **Independent variables**

- 46 • Patient-related (socio-demographic characteristics, heart disease knowledge, healthy lifestyle and heart  
47 disease risk perception, presence of comorbidity, type of medications, treatment adherence, shared decision  
48 making, health-related quality Life)

### 49 50 **Cost related variables**

- 51 ○ **Medical costs** (inpatient hospital stay/hospitalization cost, outpatient clinic visit, drug acquisition costs,  
52 drug administration cost, laboratory test, and imaging study costs)  
53  
54  
55  
56  
57

- **Non-medical costs** (transportation, meal, patient time cost due to treatment, cost due informal care by family or friends)
- **Indirect costs** (absenteeism, presenteeism, unemployment, early retirement, disability, premature death)

## 2.5. Sample Size and Sampling Technique

### 2.5.1. Sample size determination

The sample size was determined by using the single population proportion formula by taking prevalence of patients controlled their BP as 14% from WHO 2016 BP control rate report (16-18) and Z value of 1.96 at 95% confidence interval. We added 10% for non-response rate and two for design effect due to multi-stage sampling technique involvement. Finally, a formula giving a larger sample size was used. Total 407 hypertensive adult patients who are on follow-up care will be included.

$$n = \frac{(Z\alpha/2)^2 P (1-P)}{d^2} = 185$$

Where: **n** = is the sample size

$$= 185 + (185 * 10\%) = 203.5$$

$$= 203.5 * 2 = 407$$

$$= 203.5 * 2 = 407$$

- **Z<sup>2</sup>**= standard normal deviation, set at 1.96, correspond to the 95% confidence interval
- **d** = is the desired level of precision/margin of error (0.05)
- **p**= prevalence of patients taking anti-hypertensive (p=28.4%), and q is 1-p.

### 2.5.2. Sampling Techniques

A multi-stage simple random sampling technique was used. We randomly selected three zones from a total of 12 zones found in the Southern region. Three general public hospitals with experience of providing CVD care for at least five years from selected four zones were included in this study. The total sample size was allocated to these hospitals based on an estimated number of adult hypertensive patients attending respective hospitals (i.e., we included 212 patients from Arba Minch General Hospital, 107 patients from Jinka General Hospital, and 88 patients from Sawula General Hospital). Finally, a consecutive sampling technique was applied in each facility until the desired sample size was achieved.

## 2.6. Data collection tools and Procedures

### 2.6.1. Model input parameters

Key model input variables include; 2020 population of selected zones, hypertension prevalence by treatment and control status, Transition probabilities to death and healthy state, cost of diagnosis, and management. Among those with treated hypertension, treated and controlled hypertension was defined based on BP control target of ISH 2020 guideline (3). We used national STPES survey data to estimate the prevalence of cardiovascular risk factors (MI, angina, heart failure, stroke, TIA). Incorporating the risk factor prevalence data in the relevant Framingham risk equation, the age and sex-specific probability of CHD and cerebrovascular disease (i.e., stroke and transient ischemic attack) events were estimated. The probability of each health state

1  
2  
3 was calculated using the age- and sex-specific CHD and cerebrovascular disease event distributions (2, 19). To  
4 estimate the corresponding probabilities, separate relative risk estimates were used for CHD events (Stable  
5 Angina, Unstable Angina, and MI) and cerebrovascular diseases (Stroke and Transient Ischemic Attack),  
6 assuming that antihypertensive treatment affects the probability of every disease state similarly across all age  
7 and sex groups. Relative risk reductions attributable to antihypertensive treatment were extracted from the  
8 peer-reviewed literature (20-22).  
9  
10  
11

12  
13 The 2020 world population prospect estimate was used for the baseline population and number of 33-year-olds  
14 projected to enter the model population from 2020-2070 (15). The annual probability of coronary heart disease  
15 and stroke was based on national STEPS survey (2), and Framingham Heart Study (23) and the Framingham  
16 Offspring Study (24), by contextualizing to Ethiopian scenario. Incident coronary heart disease events were  
17 allocated to angina pectoris, myocardial infarction, or cardiac arrest. Prevalence, joint distributions, and means  
18 of Ethiopia risk factor values were estimated from the national STEPS survey (2). Annual transition rates  
19 between risk factor levels were calculated to preserve age-range trends over time. Betas for risk function for  
20 non-blood pressure risk factors were estimated separately for the risk of incident coronary heart disease events,  
21 incident strokes, and non-CVD deaths, using examinations 1-8 of the Framingham Offspring cohort (24). Risk  
22 factors are assumed to affect the incidence of MI, arrest, and angina in proportion to the overall incidence of  
23 coronary heart disease, except tobacco smokers are assumed to have a higher relative risk for infarction and  
24 arrest (25); and a proportionately lower coefficient for angina. Environmental tobacco exposure is assumed to  
25 carry a relative risk of 1.26 for MI and cardiac arrest compared with non-exposed non-smokers (26) but not to  
26 influence angina. The number of hospitalized MI were obtained from the national STEPS survey (2). Case-  
27 fatality rates and rates of MI in subgroups were estimated from national data and other complementary sources.  
28 Prehospital arrest deaths and out-of-hospital cardiac arrests surviving to hospital discharge were estimated from  
29 our effectiveness study (Supplementary Table 1).  
30  
31  
32  
33  
34  
35  
36  
37  
38  
39

40 Survival after a coronary heart disease event was estimated and calibrated based on national or international data  
41 sources (27, 28). Rates of coronary revascularizations was estimated from the National hospital discharge survey,  
42 with mortalities estimated from aggregated historical data. Stroke incidence was assumed to be independent of the  
43 risk of new-onset coronary heart disease in the same year. The number of hospitalized strokes cases was obtained  
44 from national and regional studies. The annual probabilities of stroke after MI (29, 30) and the probability of  
45 coronary heart disease in stroke patients were based on natural history studies and systematic reviews of blood  
46 pressure control trials (31-36). A 30-day heart failure mortality and re-hospitalization data were from the  
47 THESEUS-HF registry (37) and Korean Acute Heart Failure Registry (KorAHF)(38, 39) (Supplementary Table 2  
48 and 3).  
49  
50  
51  
52  
53  
54  
55  
56  
57  
58  
59  
60

1  
2  
3 The background prevalence of CVD by age, sex, and CVD disease state (stroke, coronary heart disease, or both  
4 stroke and coronary heart disease) in 2020 was estimated from the National Health Survey data (2) and GBD 2017  
5 (40). The background prevalence of prior coronary revascularization was estimated from revascularizations before  
6 2019 and estimated survival after revascularization, while model projections were used to infer the distribution of  
7 revascularization by CVD state. Age and sex-specific health care costs were estimated using national data, and our  
8 effectiveness data. Hospitalized stroke and coronary heart disease costs and acute stroke rehabilitation costs were  
9 estimated using WHO Choice (41) inflated to 2021. Outpatient consultations, and inpatient stay and bed days were  
10 also estimated from WHO choice (41) inflated to 2021. Chronic outpatient CVD costs additional to average  
11 background health care costs for the first year after the event and subsequent years were estimated for patients with  
12 a stroke or coronary heart disease diagnosis was pooled from the 2015 national STEPS survey. Average annual non-  
13 cardiovascular costs were estimated from the national STEPS survey (2), and EDHS 2016 survey (13).

### 21 **2.6.2. Cost estimation**

22 The outcomes measures are total discounted societal costs, cost/year, and cost/patient-year. This is the amount of  
23 health budget that could be saved by effective prevention and control of hypertension. The direct costs were divided  
24 into two subcategories: direct medical costs and direct non-medical costs. Direct medical costs include; inpatient  
25 stays, outpatient clinic visits, medical services, drug acquisition, dispensing, administration, monitoring, laboratory  
26 test, and imaging study costs. The costs associated with outpatient/inpatient visits were estimated by multiplying  
27 the numbers of outpatient visits related to hypertension by the outpatient costs per year (i.e., twelve times WHO  
28 cost per outpatient visit for secondary hospitals inflated to 2021) (41).

29  
30  
31  
32  
33  
34 Data concerning medications prescribed for the management of hypertension, and associated comorbidities, and  
35 laboratory tests and imaging studies were done were collected by patient chart abstraction in index year (2020). The  
36 cost of medications used for management of hypertension and associated comorbidities was taken from Ethiopian  
37 Pharmaceutical supply agency Arba Minch regional hub selling price and retail price of Arba Minch General  
38 Hospital in 2020. The retail price of Arba Minch General Hospital was used because of the minimum distance from  
39 the Pharmaceutical supply agency hub, which could minimize markup added on retail price due to transportation  
40 cost. Costs of laboratory procedures were also taken from Arba Minch Hospital Laboratory's service price list. The  
41 prices of relevant laboratory tests and imaging studies were based on the average price of included Hospitals. The  
42 salary scale of the health workforce was based on the FMOH of Ethiopia (Supplementary Table 4).

43  
44  
45  
46  
47  
48 Ongoing program costs for hypertension care was estimated from WHO tool outputs for CVD and diabetes care  
49 and National strategic action plan (NSAP) for prevention & control of non-communicable diseases in Ethiopia  
50 2014-2016 and adjusted for 2021 inflation target population (42). Adjustment for the study population was done by  
51 multiplying the national cost by the proportion of the study population (i.e., 3%). National and regional cost  
52 estimates were based on the proportion of patients studied (i.e. 3% and 20%). We considered this strategy since the  
53  
54  
55  
56  
57  
58



1  
2  
3 age and sex distribution of hypertension among different regions in the country is did not vary significantly. The  
4 collected cost data added up and averaged by using a bottom-up approach (Figure 1). Facility-based or reference  
5 costs were used during computing costs. The total medical cost of hypertension treatment was calculated as the  
6 sum of the product of medical costs with their respective unit prices. Costs were discounted at an annual rate of  
7 3% and reported in 2021 USD (43, 44).

8  
9  
10  
11 Direct non-medical costs include transportation costs and patient time costs due to care. The cost of patient time  
12 due to care was estimated by using the average daily wage of patients (97.00 ETB) which was calculated from 2912  
13  $\pm$  2732.24 average monthly income. Transportation cost was determined by using the cost of average traveling  
14 distance and local transportation tariff (42.00 ETB) in January 2021. According to EDHS 2016 survey showed that  
15 33% of women and 88% of men are currently employed (13). This proportion was used to determine the patient  
16 time cost due to care for employed groups. For the unemployed proportion, the average daily wage of daily laborers  
17 workers working 8 hours per day for 6 days per week was used (26.53 ETB) from the monthly wage of 796.00 ETB  
18 (420-1172 ETB) (45).

19  
20  
21 Indirect costs include cost hospitalization, productivity loss due to illness, and cost of death. Cost-of hypertension-  
22 related hospitalization was taken from WHO Choice (41), costs per inpatient stay and cost per inpatient bed day  
23 times duration of hospitalization inflated for 2021, and professional time (physician, nurse laboratory professional,  
24 and pharmacist time). If a patient had multiple admissions during the year, the costs for each admission were  
25 aggregated as the total costs (46).

### 26 27 28 **2.6.3. Mortality and morbidity estimations**

29  
30  
31 Age and sex-specific mortality rates among the adult general population in Ethiopia were taken from EDHS 2016  
32 survey and extrapolated to selected populations (13). According to EDHS 2016, the probability of dying before age  
33 50 years among adults  $\geq$  15 years were 10% and 12%, in women and men respectively (13). Due to the absence of  
34 mortality data specific to hypertension treatment and control status in Ethiopia, mortality risk in the general  
35 population was attributed to those with and without hypertension using sex-specific estimates of the relative risk  
36 (RR) of all-cause mortality associated with hypertension by treatment and control status was derived from a study  
37 conducted in India was used (47). A cohort study conducted in India among adults 20 years and above to determine  
38 the Rate and Risk of all-cause mortality among people with HTN showed that the incidence of deaths in the study  
39 was 4.28% during the follow-up period of 6 years. The relative risk of mortality was 3.13 (CI: 2.91-3.37) and 1.2 in  
40 the high BP group and at age of 60 years. The age-adjusted hazard ratio of all-cause mortality for the high BP group  
41 was 2.96 (2.56-3.42) (47) (Supplementary Tables 5 and 6).

42  
43  
44 In 2020 crude death rate of the Ethiopian population-based on global estimates was 6.29 deaths per 1000  
45 population (48). The estimated prevalence of hypertension among adults was calculated from National STEPS  
46 Survey 2016, systematic review and meta-analysis, and WHO report and local studies and the mean estimated  
47  
48  
49  
50  
51



prevalence of hypertension was 21.39% (2, 13, 47, 49-52). Only 28.4% of patients with hypertension are taking antihypertensive medication (2). The mean relative risk of all-cause mortality among hypertensive population when compared to those without hypertension was 1.39 (0.95 to 1.95) (53) (Supplementary Table 3).

Years of life lost due to hypertension morbidity was determined by first calculating disability weights for specific ages based on blood pressure control status (X). Then subtract this value (X) from the life expectancy of the Ethiopian population (i.e., 66.7 years for men, and 70.4 years for women) (Y). The productivity loss cost due to hypertension morbidity was calculated by multiplying Y with sex-specific employment rate based on a monthly average income of 2059.078 ETB from the National STEPS survey 2015 adjusted for 2021 inflation (13,13/9.57=1.372) STEPS Survey, 2015 (2). The EDHS 2016 survey showed that 33% of women and 88% of men are currently employed (13) and for unemployed, 2019 minimum average monthly earnings (ETB) of daily laborers reported by the MOLSA 796 ETB (420-1172 ETB) (45). Concerning, cost of productivity lost due to premature mortality: first we calculated potential years of life lost (YLL) by subtracting life expectancy from sex-specific age of death at which the death is recorded (Z). Then Z is multiplied by the number of deaths in each age group (Xi). Finally, we multiplied Xi with sex-specific employment rates like productivity loss due to hypertension-related morbidity above (54). Excess mortality and morbidity due to hypertension to hypertension were determined by subtracting age and sex-specific morbidity and mortality among the general population from the hypertensive cohort. Both were determined by using age, sex, and blood pressure treatment status mortality rate per 1000 person-years (Supplementary Table 6).

#### 2.6.4 Morbidity adjustment

Patients with hypertension may have more than one disease, the addition of YLDs across causes may result in overestimation of the total loss of health (55). Therefore, it is recommended to estimate comorbidities using the assumption of independence within age-sex groups (56):

$$P_{1+2} = P_1 + P_2 - (P_1 \times P_2) = 1 - (1 - P_1) \times (1 - P_2)$$

- Where  $P_{1+2}$  is the prevalence of the two comorbid diseases 1 and 2,
- $P_1$  is the prevalence of disease 1 and  $P_2$  is the prevalence of disease 2.

The combined disability weight for individuals with multiple conditions is estimated assuming a multiplicative model as follows:

$$DW_{1+2} = 1 - (1 - DW_1) \times (1 - DW_2)$$

Since prevalence YLDs are calculated for each cause as:

$$YLD_i = DW_i \times P_i$$

- two preceding equations can be combined into a single calculation resulting in:

$$YLD_{1+2} = 1 - (1 - YLD_1) \times (1 - YLD_2)$$

### 2.6.5 Assumptions and Transition probabilities

The counterfactual comparator (hypothetical cohort of normotensive individuals) with a probability of developing CVD events among the general population. Both in case and comparator cohorts, the probability of non-CV death does not depend on the health state and is similar for both hypertensive and normotensive populations (57) and we chose not to model differential use of antihypertensive medication classes in order not to bias cost-of-treatment. Antihypertensive dose intensification and frequency of BP monitoring were based on ISH 2020 guidelines for blood pressure control. We did not simulate the effects of any particular medication; instead, we simulated “standard dose” effects and assumed average drug prices across classes (58). The amount of blood pressure change was assumed to be a function of the baseline BP and the effect of a standard-dose antihypertensive agent at that pre-treatment level (59). We also assumed the medication adherence rate as 75% based on clinical trials (59). Other important assumptions include cost of illness due to hypertension or associated morbidities were calculated based on the monthly earnings during data collection; all costs incurred before one year were adjusted/accounted to today’s value (2021 USD equivalent) and discounted at 3%; years of life lost and years of life lived with disability (YLDs) were not discounted as per the recent WHO recommendations.

### 2.7. Data Quality control, Processing, and Analysis

Questionnaires are prepared in English and the patient interview part of the questionnaire was translated into Amharic and translated back into English to check its consistency. The Amharic version of the patient interview questionnaire and English version of the health professional interview, data abstraction form, and health system interview questionnaires was used for data collection. The questionnaire was pretested on 30 adult hypertensive patients in Arba Minch General Hospital to ensure that the respondents could understand the questions and to check for consistency and possible amendments were made based on findings. Six professional nurses (BSc.) for data collection and one senior professional working in the respective health facilities for supervision were oriented before data collection about data collection approaches and contents of data collection format for one day by the principal investigator. Continuous follow-up and supervision were made by the principal investigator throughout the data collection period. The collected data were checked for completeness and consistency by the principal investigator on daily basis at the spot during the data collection time. Then data were transcribed back to English for the patient interview part and entry was made using Epi-data 3.1 software. After data processing, analysis was done by using SPSS version 21.0 and Microsoft excel 2010. A summary of descriptive statistics was reported for socio-demographic factors; cost of hypertension and life years lost due to hypertension related morbidity and premature mortality and presented in tables and figures.

### 2.8. Patient and Public involvement

1  
2  
3 There was no identifiable patient involvement in this research. Patients' demographic characteristics and disease  
4 related variables were obtained by using questionnaire based interview after obtaining verbal consent from the  
5 patient. No patient identifier information was collected. Finally, most of variables were taken from published  
6 national and international literatures, and all relevant sources were acknowledged through citation.  
7  
8  
9

## 10 **2.8. Statements**

### 11 **Ethics approval and consent to participate**

12  
13 The study was approved by Tehran University of medical sciences, Faculty of pharmacy, department of  
14 pharmacoconomics, and pharmaceutical administration ethical review board with Approval ID:  
15 *IR.TUMS.MEDICINE.REC.1399.674* and Arba Minch University College of medicine and health sciences  
16 Institutional review board with Reference number: *IRB/T10/2012*. After clarifying the study objective and  
17 confidentiality of the information; verbal informed consent was obtained from each respective hospital before  
18 data collection.  
19  
20  
21  
22  
23  
24

### 25 **Consent for publication**

26  
27 All authors read the full version of this manuscript and agreed to publish  
28  
29

### 30 **Availability of data and materials**

31  
32 All the data reported in the manuscript are publicly available up on official request of principal investigator  
33 upon acceptance of the manuscript  
34  
35

### 36 **Competing interests**

37  
38 The authors declare that they have no competing interests.  
39  
40

### 41 **Funding**

42  
43 There is no funding source for the study.  
44  
45

### 46 **Authors' contributions**

47 All Authors read and approved the manuscript. *MM* conceived the research, framed the format design and  
48 developed the manuscript for publication; *MD* participated in data analysis and reviewed the manuscript and *AK*  
49 reviewed the manuscript and write-up process; *NS* and *TS* participated in literature review and polished the  
50 language of the manuscript.  
51  
52  
53  
54  
55  
56  
57  
58  
59  
60

### 3. Results

#### 3.1. Description of study participants

In this study, we estimated the regional and national economic burden of hypertension (direct and indirect costs) by using the cardiovascular disease policy model adapted to the Sub-Saharan Africa perspective (60) (Supplementary Figure 1). Total costs of treated hypertension and hypertension-related excess mortality and years of life lost due to hypertension were determined. We followed a cohort of 406 hypertensive patients retrospectively for 10 years from September 2003 to 2013 Ethiopian calendar (September 2010-2020) for baseline assessment and simulated the cost of hypertension for lifelong from a societal perspective. About two-thirds, 250 (61.6%) of patients were females with a mean age of  $55.87 \pm 11.03$  years. Less than 1 in five 75 (18.5%) of patients achieved their BP control target based on international society of hypertension 2020 guidelines (Table 1).

**Table 1:** Patient characteristics and Disease related factors among adult hypertensive patients on regular follow-up at selected public hospitals in Southern Ethiopia, January 2021 (n=406)

| Sociodemographic factors                 |                                 | Frequency   |
|------------------------------------------|---------------------------------|-------------|
| Sex                                      | Male                            | 156 (38.4%) |
|                                          | Female                          | 250 (61.6%) |
| Age in in years                          | Below 40 years                  | 15 (3.7%)   |
|                                          | 40- 65 years                    | 286 (70.4%) |
|                                          | 65 years and above              | 105 (25.9%) |
| Religion                                 | Orthodox                        | 215 (53.0%) |
|                                          | Muslim                          | 37 (9.1%)   |
|                                          | Protestant                      | 144 (35.5%) |
|                                          | Catholic                        | 10 (2.5%)   |
| Annual gross income before tax (n=406)   | Less than 12,000                | 117 (28.8%) |
|                                          | 12,000- 18,000                  | 89 (21.9%)  |
|                                          | 18,000- 23,000                  | 200 (49.2%) |
| Level of Education                       | Illiterate                      | 259 (63.8%) |
|                                          | Grades 1-8                      | 46 (11.3%)  |
|                                          | Grades 9-12                     | 22 (5.4%)   |
|                                          | College and above               | 73 (18.0%)  |
|                                          | Post-graduate degree            | 6 (1.5%)    |
| Occupation                               | Employed                        | 65 (16.0%)  |
|                                          | Merchant                        | 63 (15.5%)  |
|                                          | Farmer                          | 79 (19.5%)  |
|                                          | House wife                      | 149 (36.7%) |
| <b>Disease related factors</b>           |                                 |             |
| Duration of hypertension since diagnosis | 5 - 9 years                     | 262 (64.5%) |
|                                          | 10 - 14 years                   | 131 (32.3%) |
|                                          | 15 and above years              | 13 (3.2%)   |
| Family history of CVDs                   | 1 <sup>st</sup> degree relative | 133 (32.7%) |
|                                          | Second degree relative          | 16 (3.9%)   |
|                                          | None                            | 257 (63.3%) |
| Presence of comorbidities (n=406)        | Yes                             | 310 (76.4%) |
|                                          | No                              | 96 (23.6%)  |
| History of hospitalization               | Yes                             | 250 (61.6%) |

|                                                |                                 |             |
|------------------------------------------------|---------------------------------|-------------|
|                                                | No                              | 156 (38.4%) |
| Duration of hospitalization (n=250)            | Below 5 days                    | 56 (22.4%)  |
|                                                | 5 to 10 days                    | 112 (44.8%) |
|                                                | More than 10 days               | 82 (32.8%)  |
| Target BP achieved based on ISH 2020 guideline | Yes                             | 75 (18.5%)  |
|                                                | No                              | 331 (81.5%) |
| Antihypertensive regimen                       | Monotherapy                     | 136 (33.5%) |
|                                                | Two drug combination            | 234 (57.6%) |
|                                                | Three and more drug combination | 36 (8.8%)   |

### 3.2. Cost of hypertension

#### 3.2.1 Direct (medical and non-medical) costs

Direct medical costs include program costs, cost of drugs for hypertension and comorbidities, laboratory costs, hospitalization costs, annual outpatient visit costs, and costs of medical supplies. A total of \$US 64,837.48 direct cost was incurred due to hypertension. Out of this, 80.0% (\$US 51,915.40) was direct medical cost. From direct medical costs, annual outpatient visit cost 33.55% (\$US 17,419.73), cost of comorbidity 26.21% (\$13,612.15 USD), and laboratory test costs 8.17% (\$US 4,263.29) took the largest share. While, total direct non-medical costs of hypertension was \$US 9,866.58 (i.e. transportation costs and patient time costs due to care). The regional and national annual estimated direct cost of hypertension were \$US 324,187.40 and \$US 2,161,249.33 respectively (Table 2).

**Table 2:** Direct annual costs of treating hypertension among adults in Southern Ethiopia, January 2021 (n=406)

| Cost category                                                | Annual total in ETB<br>Total (mean $\pm$ Standard deviation) | Annual cost<br>in July 2021<br>USD | Percentage<br>from total<br>direct cost |
|--------------------------------------------------------------|--------------------------------------------------------------|------------------------------------|-----------------------------------------|
| <b>Direct medical total</b>                                  | <b>2,258,319.97</b>                                          | 51,915.40                          | 80.0%                                   |
| Program costs                                                | 403,275.70 (993.0 $\pm$ 0.00)                                | 9,173.40                           |                                         |
| Cost of antihypertensives                                    | 119,847.64 (295.19 $\pm$ 107.78)                             | 2,726.20                           |                                         |
| Cost of drugs for comorbidity                                | 598,409.00 (2266.7 $\pm$ 1114.52)                            | 13,612.15                          |                                         |
| Cost for hospitalization                                     | 179,377.03 (3360.76 $\pm$ 1594.69)                           | 4,080.33                           |                                         |
| Laboratory tests                                             | 187,420.00 (461.63 $\pm$ 226.98)                             | 4,263.29                           |                                         |
| Annual outpatient visit costs                                | 765,795.60 (1886.20 $\pm$ 0.00)                              | 17,419.73                          |                                         |
| Cost of medical supplies                                     | 4,195.00 (85.60 $\pm$ 0.00)                                  | 95.42                              |                                         |
| <b>Professional time total</b>                               | <b>128,362.01</b>                                            | 2,950.85                           | 4.6%                                    |
| Physician time                                               | 92,032.08 (226.68 $\pm$ 0.00)                                | 2,093.47                           |                                         |
| Nurse time                                                   | 2,060.28 (43.84 $\pm$ 17.81)                                 | 46.87                              |                                         |
| Pharmacy time                                                | 4,453.01 (10.97 $\pm$ 0.00)                                  | 101.29                             |                                         |
| Laboratory time                                              | 29,816.64 (73.44 $\pm$ 0.00)                                 | 678.25                             |                                         |
| <b>Direct non-medical costs</b>                              | <b>433,748.59</b> (1068.84 $\pm$ 384.78)                     | 9,866.58                           | <b>15.37%</b>                           |
| Total direct cost of treated hypertension                    | 2,820,430.57                                                 | 64,837.48                          | 100.00%                                 |
| 1USD= 43.9614 ETB on July 13, 2021                           |                                                              |                                    |                                         |
| <b>ETB:</b> Ethiopian Birr; <b>USD:</b> United States Dollar |                                                              |                                    |                                         |

### 3.2.2. Life years lost due to premature mortality and morbidity

We determined the years of life lost due to premature mortality (excess mortality) and years of life lost due to hypertension morbidity for the productive age population (30-64 years) among a cohort of simulated adult hypertensive patients. Excess mortalities are all-cause deaths observed in those with hypertension compared to the same cohort assuming no hypertension. The excess mortality and years of life lost were different among the hypertensive cohort and simulated population with no hypertension. A total of 11,858 (6,159, men; 5,699 women) life years were lost due to hypertension-related premature mortality among 30-64 years old adults with hypertension. This equates \$US 428,969.78 (\$US 270,076.91, men; \$US 158,892.78). The estimated regional and national life years lost due to premature mortality was 59,290 and 395,267 respectively. This is equivalent to \$US 2,144,848.58 and \$US 14,298,990.51 respectively. From 15,232 years lost due to premature mortality in the hypertension cohort, treated and uncontrolled hypertension accounted for more than 6,824 (44.8%) total years lost due to premature mortality followed by treated controlled hypertension 5,832 (38.29%) and untreated hypertension 2,575 (16.9%) (Table 3 and 4).

**Table 3:** Excess deaths among adult hypertensive by treatment and control status over the working lifetime simulated from life table modelling in Southern Ethiopia January 2021

| Age group                                                                                                                     | Deaths in Treated hypertension cohort | Deaths in 'hypertension cohort' assuming no hypertension | Excess deaths in those with treated hypertension | Deaths in those with hypertension by treatment and control status * |                          |           |
|-------------------------------------------------------------------------------------------------------------------------------|---------------------------------------|----------------------------------------------------------|--------------------------------------------------|---------------------------------------------------------------------|--------------------------|-----------|
|                                                                                                                               |                                       |                                                          |                                                  | Treated and controlled                                              | Treated and uncontrolled | Untreated |
| <b>Men</b>                                                                                                                    |                                       |                                                          |                                                  |                                                                     |                          |           |
| 30-34                                                                                                                         | 1,436                                 | 448                                                      | 988                                              | 487                                                                 | 501                      | 295       |
| 35-39                                                                                                                         | 1,180                                 | 381                                                      | 799                                              | 401                                                                 | 398                      | 242       |
| 40-44                                                                                                                         | 1,027                                 | 428                                                      | 599                                              | 357                                                                 | 242                      | 191       |
| 45-49                                                                                                                         | 1,735                                 | 224                                                      | 1,511                                            | 1,167                                                               | 344                      | 163       |
| 50-54                                                                                                                         | 989                                   | 166                                                      | 823                                              | 370                                                                 | 453                      | 123       |
| 55-59                                                                                                                         | 731                                   | 123                                                      | 608                                              | 273                                                                 | 335                      | 91        |
| 60-64                                                                                                                         | 932                                   | 101                                                      | 831                                              | 362                                                                 | 469                      | 127       |
| Total                                                                                                                         | 8,030                                 | 1,871                                                    | 6,159                                            | 3,417                                                               | 2,742                    | 1,232     |
| <b>Women</b>                                                                                                                  |                                       |                                                          |                                                  |                                                                     |                          |           |
| 30-34                                                                                                                         | 1,401                                 | 415                                                      | 986                                              | 434                                                                 | 552                      | 310       |
| 35-39                                                                                                                         | 1,187                                 | 212                                                      | 975                                              | 368                                                                 | 607                      | 263       |
| 40-44                                                                                                                         | 1,019                                 | 287                                                      | 732                                              | 324                                                                 | 408                      | 205       |
| 45-49                                                                                                                         | 832                                   | 279                                                      | 553                                              | 265                                                                 | 288                      | 167       |
| 50-54                                                                                                                         | 887                                   | 91                                                       | 796                                              | 350                                                                 | 446                      | 137       |
| 55-59                                                                                                                         | 805                                   | 72                                                       | 733                                              | 277                                                                 | 456                      | 109       |
| 60-64                                                                                                                         | 1,071                                 | 147                                                      | 924                                              | 396                                                                 | 528                      | 154       |
| Total                                                                                                                         | 7,202                                 | 1,503                                                    | 5,699                                            | 2,414                                                               | 3,285                    | 1,345     |
| <b>Box sex total</b>                                                                                                          | 15,232                                | 3,374                                                    | 11,858                                           | 5,831                                                               | 6,027                    | 2,577     |
| * Excess deaths are all-cause deaths observed in those with hypertension compared to the same cohort assuming no hypertension |                                       |                                                          |                                                  |                                                                     |                          |           |

**Table 4:** Years of life lost (YLL) by adults with hypertension by treatment and control status over the lifetime simulated from life table modelling in Southern Ethiopia, January 2021

| Age group    | Years of life lived in treated hypertension cohort | Years of life lived in 'hypertension cohort' assuming no hypertension | YLL lost to Treated hypertension (excess) | YLL lost due to hypertension by treatment and control status * |                          | Years of life lived in untreated hypertension cohort | YLL lost due to Untreated hypertension |
|--------------|----------------------------------------------------|-----------------------------------------------------------------------|-------------------------------------------|----------------------------------------------------------------|--------------------------|------------------------------------------------------|----------------------------------------|
|              |                                                    |                                                                       |                                           | Treated and controlled                                         | Treated and uncontrolled |                                                      |                                        |
| <b>Men</b>   |                                                    |                                                                       |                                           |                                                                |                          |                                                      |                                        |
| 33-39        | 199.87                                             | 181.2                                                                 | 18.67                                     | 18.67                                                          | NA                       | 122.67                                               | 58.53                                  |
| 40-44        | 357.48                                             | 324.1                                                                 | 33.38                                     | 16.67                                                          | 17.71                    | 219.42                                               | 104.68                                 |
| 45-49        | 587.08                                             | 522.5                                                                 | 64.58                                     | NA                                                             | 64.58                    | 353.73                                               | 168.77                                 |
| 50-54        | 341.9                                              | 295.3                                                                 | 46.6                                      | NA                                                             | 46.6                     | 199.92                                               | 95.38                                  |
| 55-59        | 161.63                                             | 140.1                                                                 | 21.53                                     | NA                                                             | 21.53                    | 94.85                                                | 45.25                                  |
| 60-64        | 129.88                                             | 109.4                                                                 | 20.48                                     | NA                                                             | 20.48                    | 74.06                                                | 35.34                                  |
| Total        | 1777.84                                            | 1572.6                                                                | 205.24                                    | 35.34                                                          | 169.9                    | 1,064.65                                             | 507.95                                 |
| <b>Women</b> |                                                    |                                                                       |                                           |                                                                |                          |                                                      |                                        |
| 33-39        | 318.33                                             | 288.6                                                                 | 29.73                                     | 29.73                                                          | NA                       | 195.38                                               | 93.22                                  |
| 40-44        | 791.95                                             | 718                                                                   | 73.95                                     | 73.95                                                          | NA                       | 486.09                                               | 231.91                                 |
| 45-49        | 1147.34                                            | 1040.2                                                                | 107.14                                    | NA                                                             | 107.14                   | 704.22                                               | 335.98                                 |
| 50-54        | 953.59                                             | 863.8                                                                 | 89.79                                     | NA                                                             | 89.79                    |                                                      | 279.01                                 |
| 55-59        | 491.71                                             | 445.8                                                                 | 45.91                                     | NA                                                             | 45.91                    | 309.52                                               | 143.99                                 |
| 60-64        | 297.81                                             | 270                                                                   | 27.81                                     | NA                                                             | 27.81                    | 182.79                                               | 87.21                                  |
| Total        | 4,000.73                                           | 3626.4                                                                | 374.33                                    | 103.68                                                         | 270.65                   | 1,878.00                                             | 1,171.33                               |
| Grand total  | 5,778.57                                           | 5199                                                                  | 579.57                                    | 139.02                                                         | 440.55                   | 2,942.65                                             | <b>1,679.28</b>                        |

NA= No patient is reported in this age group; \* YLL=years of life lost by those with hypertension compared to the same cohort assuming no hypertension.

A total of 579.57 (205.24 men; 374.33 women) years of life were lost due to hypertension morbidity. This equates to \$US 19,436.56. A total of 11,858 (6,159 men; 5,699 women) years of life were lost due to hypertension related premature mortality. This equates to \$US 429,958.12. Total productivity loss due to premature mortality and morbidity was \$US 449,394.68 (Table 5). Treated and uncontrolled hypertension accounted for 2,937.72 (50.84%) of productive life years lost, followed by untreated hypertension 1,679.28 (29.06%). Treated uncontrolled hypertension contributed to more YLL due to premature mortality in both sexes 6,824 (44.8%), and life years lost due to hypertension morbidity 2, 9378 (50.84%) (Figure 2).

The overall estimated hypertension related economic burden (direct and indirect cost) was \$US 514,232.16 in the study area (Table 2 and Table 5). Since the study population is estimated to be 20% of the Southern region, the estimated economic burden of hypertension in the region is \$US 2,571,160.8 in the region. More than eight out of ten 87.37% dollars were due productivity loss. Productivity loss is calculated by taking 88% employment rate for men, 33% employment rate for women. Monthly wage of employed 2059.078 from EDHS 2016 and National STEPS survey 2015 which is adjusted for current inflation (1.3689). Unemployment/unpaid monthly wage of 796 ETB (Table 5).



**Table 5:** Mean annual productivity loss associated premature mortality and hypertension morbidity, Southern Ethiopia, January, 2021

| Variable                                 | Sex    | Excess Years lost | Lost productivity ETB | Lost productivity in 2021 USD |
|------------------------------------------|--------|-------------------|-----------------------|-------------------------------|
| Years lost due to premature mortality    | Male   | 6,159             | 11,748,345.71         | \$270,699.21                  |
|                                          | Female | 5,699             | 6,911,836.90          | \$159,258.91                  |
|                                          | Both   | 11,858            | 18,660,182.62         | \$429,958.12                  |
| Years lost due to hypertension morbidity | Male   | 205.24            | 391,497.07            | \$8,999.93                    |
|                                          | Female | 374.33            | 453,993.32            | \$10,436.63                   |
|                                          | Both   | 579.57            | 845,490.39            | \$19,436.56                   |
| Total productivity loss                  |        |                   | 19,505,673.01         | \$449,394.69                  |
| 1USD=43.5 ETB                            |        |                   |                       |                               |

**Note:** productivity loss is calculated by taking 88% employment rate for men, 33% employment rate for women. Monthly wage of employed 2059.078 from EDHS 2016 and National STEPS survey 2015 which is adjusted for current inflation (1.3689). Unemployment/unpaid monthly wage of 796 ETB

#### 4. Discussion

In this prevalence-based retrospective cost of illness study, we estimated the economic burden of hypertension among productive age population from societal perspective. A total direct (medical and non-medical) annual cost incurred due to hypertension in the study population was \$US 64,837.48 (\$US 13.308 per person per month). Out of direct costs, 80.0% (\$US 51,915.40) was direct medical cost. While, the total indirect annual cost incurred due to hypertension was \$US 449,394.69 (\$US 92.24 per person per month). The total annual economic burden of hypertension was \$US 514,232.16 (\$ US 1266.58 per person per year). This is higher than findings from another institution-based cross-sectional study conducted to evaluate cost of hypertension illness among patients attending hospitals in Southwest Shewa Zone that showed the mean monthly total cost of hypertension illness was US\$ 22.3 (95% CI, 21.3–23.3) (61). Findings from an institution-based cross-sectional study conducted to estimate the direct and indirect costs of hypertension at Gondar Specialized Hospital showed that total cost of hypertension was \$91.72 ± 78.65 per patient per year (62). The COI study conducted among 202 hypertensive patients in Ghana that showed the total annual treatment cost of hypertension was \$US 76,275.60 (\$US31.47 per person per month) (63). However, this is less than findings from and a study conducted in Canada also showed that annual individual healthcare cost of hypertension was \$ US 2,341 (64), and study conducted in the USA showed that individuals with hypertension had \$ US 1,920 higher annual incremental expenditure (65). This variation could be explained by variation in socioeconomic status and population health status, and our findings could underestimate both costs and health-related life loss due to the asymptomatic nature of hypertension (66), a significant number of undiagnosed hypertension among adults, and difference in health care system and level of care.

In this study, indirect cost accounted for more than three fourth of hypertension-related costs 85.6% (\$449,394.69 USD). This is against evidence generated by a cross-sectional study conducted to determine the

1  
2  
3 burden of out-of-pocket payments among patients with cardiovascular disease in public and private hospitals  
4 in Ibadan, South West, Nigeria showed that across all the hospital facilities, the annual direct and indirect  
5 outpatient costs were \$1164.2± \$2363.8 and \$52.87±\$148.05 respectively (67). An institution-based cross-  
6 sectional study conducted to estimate the direct and indirect costs of hypertension at Gondar Specialized  
7 Hospital showed that the direct medical and non-medical cost constituted 60.81% and 12.17% of the total  
8 cost of hypertension respectively (62). An institution-based cross-sectional study conducted to evaluate cost  
9 of hypertension illness among Patients Attending Hospitals in Southwest Shewa Zone showed that the mean  
10 monthly total cost of hypertension illness was US\$ 22.3 (direct cost of US\$ 11.39 and indirect cost US\$ 10.89)  
11 (61). This is also higher than evidence that suggested about a half of the costs associated with CVD burden are  
12 caused by direct healthcare costs (68). The findings from a study conducted in Ghana direct cost accounting  
13 for almost 70% of the total cost of managing hypertension (63). Similarly, a study conducted in rural Yunnan  
14 Province of China showed that direct costs represented the largest component of the economic cost of  
15 hypertension (69). The variation could be explained by significant number of productive age populations  
16 affected hypertension in the study area and poor blood pressure control. Therefore, it is important to promote  
17 existing strategies and develop country/region-specific strategies for hypertension prevention and control (i.e.,  
18 annual screening of the high-risk population and promoting healthy lifestyles) by all stakeholders could reduce  
19 the economic burden of hypertension Ethiopia (70, 71).

20  
21 Concerning pre-mature mortality, a total of 11,858 (6,159, men; 5,699 women) years were lost due to  
22 hypertension-related premature mortality. This equates \$US 429,958.12. Concerning health-related life loss,  
23 about 26,678 deaths per study population were due to hypertension. This is higher than the number of  
24 hypertension-related death occurred in 2017, which as 11,050 (7). This could be explained by the increasing  
25 trend of hypertension in the country.

26  
27 From 11,585 years lost due to premature death in the treated hypertension cohort. More than one-half of related  
28 deaths, 6027 (50.83%) were due to treated uncontrolled hypertension. This is supported by evidence from other  
29 studies that revealed uncontrolled blood pressure cost \$370 billion globally in 2001 (72). This is because the  
30 relative risk of all-cause mortality is higher among treated and uncontrolled (1.62) than untreated (1.40) and  
31 treated controlled (1.12) patients (53).

32  
33 Untreated hypertension accounted for 1,679.28 (507.95 men, 1171.33 women) years of life lost. Treated and  
34 uncontrolled hypertension accounted for 440.55 (76.01%) of productive life years lost from treated  
35 hypertension cohort. This is higher than findings from a study conducted to estimate the economic burden of  
36 hypertension in a given year in rural Yunnan Province of China showed that the overall prevalence of and  
37 YLL/1000 population because of hypertension was 24.8% and 1.5 years for the survey population, respectively  
38 (69). A total of 579.57 (205.24 men; 374.33 women) years of life were lost due to treated hypertension. The

1  
2  
3 estimated national life years lost due to hypertension is 19,319 (i.e., \$US 846,413.56). This is supported by  
4 evidence from a study conducted Australia that revealed hypertension caused 609,801 productivity-adjusted  
5 life years loss (equating to AUD\$ 137.2 billion) over the working lifetime (73). Therefore, prevention of  
6 hypertension and improving the rate of blood pressure control is important to reduce hypertension-related  
7 complications and productive life-year loss in the region as well as in the country (74).  
8  
9  
10

## 11 12 **5. Conclusion**

13 The societal economic burden of hypertension in Southern Ethiopia was substantial. Indirect costs accounted  
14 for more than eight out of 10 dollars economic burden. Prevention of hypertension could result in \$US  
15 2,571,160.8 annual economic savings in the Southern Region. Therefore, designing and implanting strategies  
16 for prevention of hypertension, early screening, and detection, and improving the rate of blood pressure control  
17 by involving all relevant stakeholders at all levels (national, regional, zonal, community, and patient-level) is  
18 critical to saving scarce health resources.  
19  
20  
21  
22  
23  
24  
25  
26  
27  
28  
29  
30  
31  
32  
33  
34  
35  
36  
37  
38  
39  
40  
41

## 42 **6. Abbreviations**

43 **BP:** Blood Pressure

44 **CPG:** Clinical Practice Guideline

45 **CVD:** Cardiovascular Diseases

46 **DALY:** Disability Adjusted Life Years

47 **DBP:** Diastolic Blood Pressure

48 **EDHS:** Ethiopia Demographic Health Survey

49 **HDL:** High-Density Lipoprotein

50 **ICER:** Incremental Cost-Effectiveness Analysis

51 **LDL:** Low-Density Lipoprotein  
52  
53  
54  
55  
56  
57  
58  
59  
60

1  
2  
3 **LMICs:** Low- and Middle-income Countries

4 **MI:** Myocardial Infarction

5 **QALY:** Quality Adjusted Life Years

6 **SBP:** Systolic Blood Pressure

7 **VLDL:** Very Low-Density Lipoprotein

8 **WHO:** World Health Organization

9 **YLD:** Years Lived with Disability

10 **YLL:** Years of Life Lost

11  
12  
13  
14  
15  
16  
17  
18  
19  
20  
21  
22  
23  
24  
25  
26  
27  
28  
29  
30  
31  
32  
33  
34  
35  
36  
37  
38 **7. References**

- 39  
40 1. Whelton PK CR, Aronow WS, Casey DE Jr, Collins KJ, Dennison Himmelfarb C, DePalma SM,  
41 Gidding S, Jamerson KA, Jones DW, MacLaughlin EJ, Muntner P, Ovbigele B, Smith SC Jr, Spencer CC,  
42 Stafford RS, Taler SJ, Thomas RJ, Williams KA Sr, Williamson JD, Wright JT Jr. 2017  
43 ACC/AHA/AAPA/ABC/ACPM/AGS/APhA/ASH/ASPC/NMA/PCNA guideline for the prevention,  
44 detection, evaluation, and management of high blood pressure in adults: a report of the American College of  
45 Cardiology/American Heart Association Task Force on Clinical Practice Guidelines. *Hypertension* (Dallas, Tex  
46 : 1979). 2018;71:e13-e115.
- 47 2. Institute. EPH. Ethiopia steps report on risk factors for chronic non-communicable diseases and  
48 prevalence of selected NCDs. 2016.
- 49 3. Thomas Unger, Claudio Borghi, Fadi Charchar, Nadia A. Khan, Neil R. Poulter, Dorairaj Prabhakaran,  
50 et al. 2020 International Society of Hypertension Global Hypertension Practice Guidelines. *Hypertension*.  
51 2020;75(00):1-25.
- 52 4. O'Donnell MJ, Xavier D, Liu L, Zhang H, Chin SL, Rao-Melacini P, et al. Risk factors for Ischemic  
53 hart disease and Intracerebral Haemorrhagic stroke in 22 countries (the UNTERSTROKE study): a case-  
54 control study. *The Lancet*. 2010;376(9735):112-23.
- 55 5. Organization WH. A heavy burden: the productivity cost of illness in Africa. 2019.

6. Region WSEA. Special Issue on Blood Pressure-take control. India2013 World Health Day.
7. WHO. Health profile: Ethiopia. World Health Rankings: [Internet]. 2017. Available from: <https://www.worldlifeexpectancy.com/country-health-profile/ethiopia>.
8. Tarricone R. Cost-of-illness analysis: what room in health economics? *Health policy*. 2006;77(1):51-63.
9. Lesyuk W, Kriza C, Kolominsky-Rabas P. Cost-of-illness studies in heart failure: a systematic review 2004–2016. *BMC Cardiovascular Disorders*. 2018;18(1):74.
10. Menzin J, Marton JP, Menzin JA, Willke RJ, Woodward RM, Federico V. Lost productivity due to premature mortality in developed and emerging countries: an application to smoking cessation. *BMC medical research methodology*. 2012;12(1):87.
11. Liu J, Maniadakis N, Gray A, Rayner M. The economic burden of coronary heart disease in the UK. *Heart*. 2002;88(6):597-603.
12. Organization WH. WHO guide to identifying the economic consequences of disease and injury. 2009.
13. ICF C. Ethiopia Demographic and Health Survey 2016, Addis Ababa, Ethiopia, and Rockville, Maryland, USA: CSA and ICF. DF-1.6.
14. Massimo Volpe CS. Natural History of Treated and Untreated Hypertension. In: Berbari A, Mancia G. (eds) *Disorders of Blood Pressure Regulation. Updates in Hypertension and Cardiovascular Protection*. Springer, Cham: Springer, Cham; 2018.
15. Desa U. World population prospects 2019: Highlights. New York (US): United Nations Department for Economic and Social Affairs. 2019.
16. Norheim OF, Baltussen R, Johri M, Chisholm D, Nord E, Brock D, et al. Guidance on priority setting in health care (GPS-Health): the inclusion of equity criteria not captured by cost-effectiveness analysis. *Cost Eff Resour Alloc*. 2014;12:18-.
17. World Health Organization. It's time to walk the talk: WHO independent high-level commission on noncommunicable diseases final report. Geneva: World Health Organization; 2019. Licence: CC BY-NC-SA 3.0 IGO. 2019.
18. Ruhil R. The Changing Wealth of Nations 2018. Building a Sustainable Future. By Glenn-Marie Lange, Quentin Wodon and Kevin Carey; Washington DC: World Bank Group.© World Bank. IASSI-Quarterly. 2018;37(1):135-7.
19. Turin TC, Okamura T, Afzal AR, Rumana N, Watanabe M, Higashiyama A, et al. Hypertension and lifetime risk of stroke. *Journal of hypertension*. 2016;34(1):116-22.
20. Beyhaghi H, Viera A. Comparative Cost-Effectiveness of Clinic, Home, or Ambulatory Blood Pressure Measurement for Hypertension Diagnosis in US Adults: A Modeling Study. *Hypertension*. 2019;73(1):121-31.
21. Law M, Morris J, Wald N. Use of blood pressure lowering drugs in the prevention of cardiovascular disease: meta-analysis of 147 randomised trials in the context of expectations from prospective epidemiological studies. *Bmj*. 2009;338:b1665.
22. Kaptoge S, Pennells L, De Bacquer D, Cooney MT, Kavousi M, Stevens G, et al. World Health Organization cardiovascular disease risk charts: revised models to estimate risk in 21 global regions. *The Lancet Global Health*. 2019;7(10):e1332-e45.
23. Dawber TR. *The Framingham Study: the epidemiology of atherosclerotic disease*. Cambridge, MA: Harvard University Press; 1980.
24. Feinleib M, Kannel WB, Garrison RJ, McNamara PM, Castelli WP. The Framingham Offspring Study. Design and preliminary data. *Prev Med*. 1975;4(4):518-25.
25. Parish S, Collins R, Peto R, Youngman L, Barton J, Jayne K, et al. Cigarette smoking, tar yields, and non-fatal myocardial infarction: 14,000 cases and 32,000 controls in the United Kingdom. *The International Studies of Infarct Survival (ISIS) Collaborators. BMJ (Clinical research ed)*. 1995;311(7003):471-7.
26. Law MR, Morris JK, Wald NJ. Environmental tobacco smoke exposure and ischaemic heart disease: an evaluation of the evidence. *BMJ (Clinical research ed)*. 1997;315(7114):973-80.
27. Medical Expenditure Panel Survey. Medical Expenditure Panel Survey Public Use Files 1996-2001 [Available from: <http://www.meps.ahrq.gov/Puf/PufSearch.asp?SearchOption=Keyword>]
28. Huffman MD, Mohanan PP, Devarajan R, Baldrige AS, Kondal D, Zhao L, et al. Effect of a Quality Improvement Intervention on Clinical Outcomes in Patients in India With Acute Myocardial Infarction: The ACS QUIK Randomized Clinical Trial. *Jama*. 2018;319(6):567-78.



29. Witt BJ, Brown RD, Jr., Jacobsen SJ, Weston SA, Yawn BP, Roger VL. A community-based study of stroke incidence after myocardial infarction. *Annals of internal medicine*. 2005;143(11):785-92.
30. Yasui D, Asayama K, Ohkubo T, Kikuya M, Kanno A, Hara A, et al. Stroke Risk in Treated Hypertension Based on Home Blood Pressure: the Ohasama Study. *American Journal of Hypertension*. 2010;23(5):508-14.
31. Amarenco P, Bogousslavsky J, Callahan A, 3rd, Goldstein LB, Hennerici M, Rudolph AE, et al. High-dose atorvastatin after stroke or transient ischemic attack. *The New England journal of medicine*. 2006;355(6):549-59.
32. Appelros P, Gunnarsson KE, Terent A. Ten-year risk for myocardial infarction in patients with first-ever stroke: a community-based study. *Acta neurologica Scandinavica*. 2011;124(6):383-9.
33. Behar S, Tanne D, Abinader E, Agmon J, Barzilai J, Friedman Y, et al. Cerebrovascular accident complicating acute myocardial infarction: incidence, clinical significance and short- and long-term mortality rates. The SPRINT Study Group. *The American journal of medicine*. 1991;91(1):45-50.
34. Lakshminarayan K, Schissel C, Anderson DC, Vazquez G, Jacobs DR, Jr., Ezzeddine M, et al. Five-year rehospitalization outcomes in a cohort of patients with acute ischemic stroke: Medicare linkage study. *Stroke; a journal of cerebral circulation*. 2011;42(6):1556-62.
35. Prosser J, MacGregor L, Lees KR, Diener HC, Hacke W, Davis S. Predictors of early cardiac morbidity and mortality after ischemic stroke. *Stroke; a journal of cerebral circulation*. 2007;38(8):2295-302.
36. Touze E, Varenne O, Chatellier G, Peyrard S, Rothwell PM, Mas JL. Risk of myocardial infarction and vascular death after transient ischemic attack and ischemic stroke: a systematic review and meta-analysis. *Stroke; a journal of cerebral circulation*. 2005;36(12):2748-55.
37. Health MSf. *International Medical Products Price Guide: 2015 edition*. 2015.
38. Lee SE, Lee HY, Cho HJ, Choe WS, Kim H, Choi JO, et al. Clinical Characteristics and Outcome of Acute Heart Failure in Korea: Results from the Korean Acute Heart Failure Registry (KorAHF). *Korean circulation journal*. 2017;47(3):341-53.
39. Choi DJ, Han S, Jeon ES, Cho MC, Kim JJ, Yoo BS, et al. Characteristics, outcomes and predictors of long-term mortality for patients hospitalized for acute heart failure: a report from the Korean heart failure registry. *Korean circulation journal*. 2011;41(7):363-71.
40. Global, regional, and national age-sex-specific mortality for 282 causes of death in 195 countries and territories, 1980-2017: a systematic analysis for the Global Burden of Disease Study 2017. *Lancet (London, England)*. 2018;392(10159):1736-88.
41. Stenberg K, Lauer JA, Gkountouras G, Fitzpatrick C, Stanciole A. Econometric estimation of WHO-CHOICE country-specific costs for inpatient and outpatient health service delivery. *Cost Effectiveness and Resource Allocation*. 2018;16(1):11.
42. Health FMo. *National strategic action plan (NSAP) for prevention & control of non-communicable diseases in Ethiopia, 2014-2016*. 2014:43-7.
43. Mieraf Taddesse Tolla OFN, Solomon Tessema Memirie, Senbeta Guteta Abdisa, Awel Ababulgu, Degu Jerene, Melanie Bertram, Kirsten Strand, Stéphane Verguet and Kjell Arne Johansson. Prevention and treatment of cardiovascular disease in Ethiopia: cost-effectiveness analysis. *Cost Eff Resour Alloc* 2016;14(10).
44. Tan-Torres Edejer T, Acharya A, Adam Ta, Baltussen R, Evans DB, Hutubessy R, et al. Making choices in health: WHO guide to cost-effectiveness analysis. 2003.
45. Iftikhar A. *Ethiopia Decent Work Check*. Amsterdam: WageIndicator Foundation; 2019. p. 49.
46. Wang G, Zhang Z, Ayala C. Hospitalization Costs Associated With Hypertension as a Secondary Diagnosis Among Insured Patients Aged 18–64 Years. *American Journal of Hypertension*. 2010;23(3):275-81.
47. Kuriakose A, Nair Anish TS, Soman B, Varghese RT, Sreelal TP, Mendez AM, et al. Rate and Risk of All Cause Mortality among People with Known Hypertension in a Rural Community of Southern Kerala, India: The Results from the Prolife Cohort. *Int J Prev Med*. 2014;5(5):596-603.
48. Atlas. WD. *Ethiopia - Crude death rate*. 2020.
49. Kelemu Tilahun Kibret, Mesfin YM. Prevalence of hypertension in Ethiopia: a systematic meta-analysis. *Public Health Reviews* 2015;36(14).
50. WHO. *Non-communicable diseases country profiles 2018*. Geneva: World Health Organization. 2018.

- 1  
2  
3 51. Helelo TP GY, Adane AA. Prevalence and Associated Factors of Hypertension among Adults in  
4 Durame Town, Southern Ethiopia. . PLoS ONE. 2014;9(11):e112790.
- 5 52. Shukuri A, Tewelde T, Shaweno T. Prevalence of old age hypertension and associated factors among  
6 older adults in rural Ethiopia. *Integrated blood pressure control*. 2019;12:23-31.
- 7 53. Zhou D, Xi B, Zhao M, Wang L, Veeranki SP. Uncontrolled hypertension increases risk of all-cause  
8 and cardiovascular disease mortality in US adults: the NHANES III Linked Mortality Study. *Sci Rep*.  
9 2018;8(1):9418.
- 10 54. Najafi F, Karami-Matin B, Rezaei S, Khosravi A, Soofi M. Productivity costs and years of potential life  
11 lost associated with five leading causes of death: Evidence from Iran (2006-2010). *Med J Islam Repub Iran*.  
12 2016;30:412-.
- 13 55. Noh J, Kim HC, Shin A, Yeom H, Jang S-Y, Lee JH, et al. Prevalence of Comorbidity among People  
14 with Hypertension: The Korea National Health and Nutrition Examination Survey 2007-2013. *Korean Circ J*.  
15 2016;46(5):672-80.
- 16 56. Organization WH. WHO methods and data sources for global burden of disease estimates 2000-2016.  
17 *Global Health Estimates Technical Paper WHO/HIS/IER/GHE/20184*, WHO, Geneva. 2018.
- 18 57. Suchard MA, Schuemie MJ, Krumholz HM, You SC, Chen R, Pratt N, et al. Comprehensive  
19 comparative effectiveness and safety of first-line antihypertensive drug classes: a systematic, multinational,  
20 large-scale analysis. *Lancet*. 2019;394(10211):1816-26.
- 21 58. Law M, Wald N, Morris J, Jordan R. Value of low dose combination treatment with blood pressure  
22 lowering drugs: analysis of 354 randomised trials. *Bmj*. 2003;326(7404):1427.
- 23 59. Law MR, Morris JK, Wald NJ. Use of blood pressure lowering drugs in the prevention of  
24 cardiovascular disease: meta-analysis of 147 randomised trials in the context of expectations from prospective  
25 epidemiological studies. *BMJ (Clinical research ed)*. 2009;338:b1665.
- 26 60. Sorato MM, Davari M, Kebriaeezadeh A, Sarrafzadegan N, Shibru T, Fatemi B. Risk of fatal and  
27 nonfatal coronary heart disease and stroke events among adult patients with hypertension: basic Markov model  
28 inputs for evaluating cost-effectiveness of hypertension treatment: systematic review of cohort studies. *Journal*  
29 *of Pharmaceutical Health Services Research*. 2021;12(2).
- 30 61. Zawudie AB, Lemma TD, Daka DW. Cost of Hypertension Illness and Associated Factors Among  
31 Patients Attending Hospitals in Southwest Shewa Zone, Oromia Regional State, Ethiopia. *Clinicoecon*  
32 *Outcomes Res*. 2020;12:201-11.
- 33 62. Adane E, Atnafu A, Aschalew AY. The Cost of Illness of Hypertension and Associated Factors at the  
34 University of Gondar Comprehensive Specialized Hospital Northwest Ethiopia, 2018. *Clinicoecon Outcomes*  
35 *Res [Internet]*. 2020 2020; 12:[133-40 pp.]. Available from: <http://europepmc.org/abstract/MED/32184636>  
36  
37 <https://doi.org/10.2147/CEOR.S234674>  
38  
39 <https://europepmc.org/articles/PMC7064277>  
40  
41 <https://europepmc.org/articles/PMC7064277?pdf=render>.
- 42 63. Offei S. Economic Burden of Hypertension among Patients Attending Nsawam-Government Hospital  
43 in the Nsawam-Adoagyiri Municipality, Eastern Region, Ghana: University of Ghana; 2018.
- 44 64. Weaver CG, Clement FM, Campbell NRC, James MT, Klarenbach SW, Hemmelgarn BR, et al.  
45 Healthcare Costs Attributable to Hypertension. *Hypertension*. 2015;66(3):502-8.
- 46 65. Kirkland EB, Heincelman M, Bishu KG, Schumann SO, Schreiner A, Axon RN, et al. Trends in  
47 healthcare expenditures among US adults with hypertension: national estimates, 2003–2014. *Journal of the*  
48 *American Heart Association*. 2018;7(11):e008731.
- 49 66. Cohen JD. Hypertension epidemiology and economic burden: refining risk assessment to lower costs.  
50 *Managed care (Langhorne, Pa)*. 2009;18(10):51-8.
- 51 67. Adeniji F. Burden of out-of-pocket payments among patients with cardiovascular disease in public and  
52 private hospitals in Ibadan, South West, Nigeria: a cross-sectional study. *BMJ Open*. 2021;11(6):e044044-e.
- 53 68. Pogossova N. Costs associated with cardiovascular disease create a significant burden for society and  
54 they seem to be globally underestimated. *European Journal of Preventive Cardiology*. 2020;26(11):1147-9.
- 55  
56  
57  
58  
59  
60



- 1  
2  
3 69. Le C, Zhankun S, Jun D, Keying Z. The economic burden of hypertension in rural south-west China. *Tropical Medicine & International Health*. 2012;17(12):1544-51.
- 4 70. Sorato MM, Davari M, Kebriaeezadeh A, Sarrafzadegan N, Shibru T, Fatemi B. Reasons for poor  
5 blood pressure control in Eastern Sub-Saharan Africa: looking into 4P's (primary care, professional, patient,  
6 and public health policy) for improving blood pressure control: a scoping review. *BMC Cardiovascular*  
7 *Disorders*. 2021;21(1):123.
- 8 71. Yoruk A, Boulos PK, Bisognano JD. The State of Hypertension in Sub-Saharan Africa: Review and  
9 Commentary. *American Journal of Hypertension*. 2017;31(4):387-8.
- 10 72. Gaziano TA, Bitton A, Anand S, Weinstein MC. The global cost of nonoptimal blood pressure. *Journal*  
11 *of hypertension*. 2009;27(7):1472-7.
- 12 73. Hird TR, Zomer E, Owen AJ, Magliano DJ, Liew D, Ademi Z. Productivity Burden of Hypertension  
13 in Australia: A Life Table Modeling Study. *Hypertension*. 2019;73(4):777-84.
- 14 74. Flack JM, Casciano R, Casciano J, Doyle J, Arikian S, Tang S, et al. Cardiovascular disease costs  
15 associated with uncontrolled hypertension. *Managed care interface*. 2002;15(11):28-36.
- 16  
17  
18  
19  
20  
21  
22  
23  
24  
25  
26  
27  
28  
29  
30

## 31 **Legends**

### 32 **List of Figures**

33  
34  
35  
36  
37 **Figure 1:** Micro-costing Bottom-up Approach for Healthcare costs. Adapted from Riewpaiboon A, et al. Cost  
38 analysis for efficient management: diabetes treatment at a public district hospital in Thailand.

39  
40  
41 **Figure 2:** Number of premature deaths and years of life lost (YLL) due to morbidity among adults with  
42 hypertension by sex, treatment and control status over productive life years simulated from life table modelling  
43 in Southern Ethiopia  
44  
45  
46  
47  
48  
49  
50  
51  
52  
53  
54  
55  
56  
57  
58  
59  
60

1  
2  
3  
4  
5  
6  
7  
8  
9  
10  
11  
12  
13  
14  
15  
16  
17  
18  
19  
20  
21  
22  
23  
24  
25  
26  
27  
28  
29  
30  
31  
32  
33  
34  
35  
36  
37  
38  
39  
40  
41  
42  
43  
44  
45  
46  
47  
48  
49  
50  
51  
52  
53  
54  
55  
56  
57  
58  
59  
60



Figure 1: Micro-costing Bottom-up Approach for Healthcare costs. Adapted from Riewpaiboon A, et al. Cost analysis for efficient management: diabetes treatment at a public district hospital in Thailand.

599x776mm (72 x 72 DPI)

1  
2  
3  
4  
5  
6  
7  
8  
9  
10  
11  
12  
13  
14  
15  
16  
17  
18  
19  
20  
21  
22  
23  
24  
25  
26  
27  
28  
29  
30  
31  
32  
33  
34  
35  
36  
37  
38  
39  
40  
41  
42  
43  
44  
45  
46  
47  
48  
49  
50  
51  
52  
53  
54  
55  
56  
57  
58  
59  
60

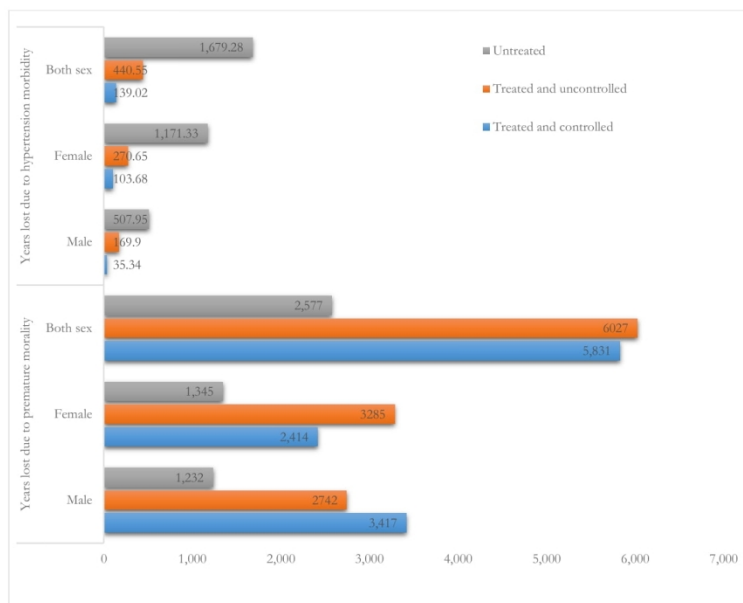

Figure 2: Number of premature deaths and years of life lost (YLL) due to morbidity among adults with hypertension by sex, treatment and control status over productive life years simulated from life table modelling in Southern Ethiopia

599x776mm (72 x 72 DPI)

**Supplementary materials:** Economic burden of hypertension at selected Hospitals in Southern Ethiopia; a patient level analysis

### Cardiovascular disease policy model

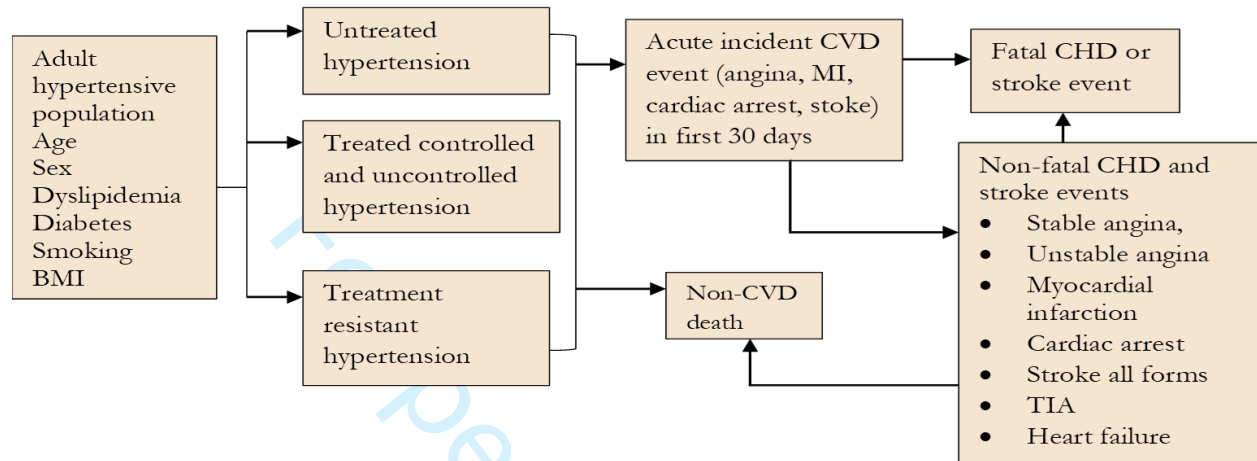

**Supplementary Figure 1:** Cardiovascular disease policy model adapted for Sub-Saharan African perspective (1).

**Supplementary Table 1:** Age and sex specific distribution of Ethiopian population 2020 estimate, prevalence of hypertension and adult mortality rate

| Age structure                     | Male       | Female     | Total       | Estimated prevalence of hypertension | Mortality rate |         | Data Source |
|-----------------------------------|------------|------------|-------------|--------------------------------------|----------------|---------|-------------|
| <b>Prevalence of hypertension</b> |            |            |             |                                      | Men            | Women   | (2-8)       |
| 0-14 years                        | 21,657,152 | 21,381,628 | 43,038,780  | NA                                   | -              | -       |             |
| 15-19                             | 5,572,330  | 5,464,174  | 11,036,504  | 19.6                                 | 0.00286        | 0.00222 |             |
| 20-24                             | 5,930,683  | 5,816,173  | 11,746,856  | 19.6                                 | 0.00319        | 0.00223 |             |
| 25-29                             | 4,889,739  | 4,802,450  | 9,692,189   | 19.6                                 | 0.00293        | 0.00232 |             |
| 30-34                             | 3,761,349  | 3,757,544  | 7,518,893   | 23.0                                 | 0.00397        | 0.00368 |             |
| 35-39                             | 3,091,148  | 3,182,837  | 6,273,985   | 23.0                                 | 0.00411        | 0.00222 |             |
| 40-44                             | 2,445,523  | 2,488,422  | 4,933,945   | 25.9                                 | 0.00584        | 0.00385 |             |
| 45-49                             | 2,071,480  | 2,033,228  | 4,104,708   | 25.9                                 | 0.00360        | 0.00457 |             |
| 50-54                             | 1,567,789  | 1,660,957  | 3,228,746   | 41.9                                 | 0.00354        | 0.00274 |             |
| 55-59                             | 1,159,002  | 1,316,318  | 2,475,320   | 41.9                                 | 0.00354        | 0.00274 |             |
| 60-64                             | 946,594    | 1,109,670  | 2,056,264   | 41.9                                 | 0.00354        | 0.00274 |             |
| ≥ 65 years                        | 1,676,478  | 1,977,857  | 3,654,335   | 41.9                                 | 0.00354        | 0.00274 |             |
| Total                             | 54,769,267 | 54,991,258 | 109,760,525 |                                      |                |         |             |
|                                   |            |            |             | Prevalence of untreated hypertension |                |         |             |
| For all ages (15 +)               |            |            |             | 13.25                                |                |         | (9)         |

**Supplementary Table 2.** Model Parameters, Cohort Setting, and Probability of Transition between states and Disability weights for hypertension and related complications the Global Burden of Disease 2013 study and WHO Global Health Estimates

| Parameter                                                          | Data                                             | Source        |
|--------------------------------------------------------------------|--------------------------------------------------|---------------|
| Relative risk of hypertension treatment                            |                                                  |               |
| Relative risk of CHD event on hypertension treatment               | 0.683 (95% CI, 0.633–0.717)                      | (10-13)       |
| Relative risk of a cerebrovascular event on hypertension treatment | 0.633 (95% CI, 0.526–0.717)                      | (14)          |
| Relative risk of CHD event on normotensive men and women           | 0.49 (95% CI 0.458–0.513) and 0.32 (0.292–0.342) | (15)          |
| <b>Transition probabilities to death</b>                           |                                                  |               |
| <b>Health state</b>                                                | <b>Disability weight Estimate</b>                | <b>Source</b> |
| <b>Hypertension</b>                                                |                                                  | (16)          |
| Treated                                                            | 0.246                                            |               |
| Untreated                                                          | 0.323                                            |               |
| Treated and controlled                                             | 0.171                                            |               |
| <b>Myocardial Infarction (MI)</b>                                  |                                                  | (17)          |
| Day 1-2                                                            | 0.432                                            |               |
| Days 3-28                                                          | 0.074                                            |               |
| <b>Angina Pectoris</b>                                             |                                                  |               |
| Mild                                                               | 0.033                                            |               |
| Moderate                                                           | 0.080                                            |               |
| Severe                                                             | 0.167                                            |               |
| <b>Heart failure</b>                                               |                                                  | (18-20)       |
| Mild                                                               | 0.041                                            |               |
| Moderate                                                           | 0.072                                            |               |
| <b>Diabetes, digestive, and genitourinary disease</b>              |                                                  |               |
| <b>Diabetes</b>                                                    | 0.015 (0.012 - 0.018)                            | (18-20)       |
| <b>Treated</b>                                                     | 0.033                                            |               |
| <b>Untreated</b>                                                   | 0.012                                            |               |

|                                                 |                     |
|-------------------------------------------------|---------------------|
| Diabetic neuropathy                             | 0.133               |
| Chronic kidney disease (stage IV)               | 0.104               |
| End-stage renal disease: with kidney transplant | 0.024               |
| End-stage renal disease: on dialysis            | 0.571               |
| Disutility due to daily medication              | 0.049 (0.031–0.072) |
| <b>Acute Events</b>                             |                     |
| Myocardial Infarction                           | 0.432 (0.288–0.579) |
| Stroke                                          | 0.570 (0.377–0.707) |
| Occurrence of second or later CVD event         | 0.985 (0.992–0.989) |
| <b>Chronic States</b>                           |                     |
| Ischemic Heart Disease                          | 0.08 (0.02–0.24)    |
| Stroke                                          | 0.135 (0.01–0.437)  |
| Alive post 2+ CVD Events                        | 0.242 (0.11–0.437)  |

CHD, coronary heart disease; SMR, standardized mortality ratio. \*Age and sex dependent †Applied multiplicatively to general population age- and sex-dependent utilities; CHD= Angina pectoris, coronary insufficiency, myocardial infarction, or coronary death.

**Supplementary table 3:** Simulation input parameters

| Input parameter                                              | Value                                                                                                                                                                                                             | Source                                                                                             |
|--------------------------------------------------------------|-------------------------------------------------------------------------------------------------------------------------------------------------------------------------------------------------------------------|----------------------------------------------------------------------------------------------------|
| Non-CVD death rate                                           | 0.005–0.176 (Age- and sex specific)#                                                                                                                                                                              | Calculated from WHO lifetables and GBD 2017 (21)                                                   |
| Probability of first-time cardiovascular disease (CVD) event | Individual risk characteristic specific                                                                                                                                                                           | Obtained from the Globorisk Office Calculator standardized for India [25]                          |
| <b>Acute CVD events</b>                                      |                                                                                                                                                                                                                   |                                                                                                    |
| MI                                                           |                                                                                                                                                                                                                   |                                                                                                    |
| Probability of MI if CVD event occurs                        | 37.6– 66.7% (Age- and sex specific)#                                                                                                                                                                              | Calculated based on GBD 2017(21)                                                                   |
| 30-day fatality                                              | 0.01–0.13 (Age- and sex-specific)#                                                                                                                                                                                | Calibrated based on findings of Huffman et al. 2018 (22)                                           |
| Re-infarction (in 30 days)                                   | 0.0120 (0.0099–0.0141)ψ                                                                                                                                                                                           | ACS QUIK Study by Huffman et al. 2018 (22)                                                         |
| Acute Stroke (in 30 days)                                    | 0.0060 (0.0045–0.0075)ψ                                                                                                                                                                                           | ACS QUIK Study by Huffman et al. 2018 (22)                                                         |
| Stroke                                                       |                                                                                                                                                                                                                   |                                                                                                    |
| Probability of Stroke if CVD event occurs                    | 33.2–62.3% (Age- and sex specific)#                                                                                                                                                                               | Calculated based on GBD 2017 (21) And Jushua D. Bundry et al(23)                                   |
| 30-day fatality                                              | 0.12, 0.13 (Sex-specific)#                                                                                                                                                                                        | Calibrated based on a multi-site study by Pandian and Sudhan 2013 [30]                             |
| Repeat Stroke (in 30 days)                                   | 0.15 (0.1–0.2)ψ                                                                                                                                                                                                   | Petty et al. 1998 (24)                                                                             |
| Sudden cardiac death                                         | 0.10 per 100 patient-years (95% CI, 0.07–0.14) in a cohort of 33 of 3242 untreated hypertensive patients without evidence of coronary or cerebrovascular HD at entry and followed up for an average of 10.3 years | Heart disease and stroke statistics 2021 update                                                    |
| <b>Heart failure</b>                                         |                                                                                                                                                                                                                   |                                                                                                    |
| Probability of AHF                                           |                                                                                                                                                                                                                   |                                                                                                    |
| 30-days fatality                                             | 0.0945                                                                                                                                                                                                            | Obtained from the THESUS-HF registry (25) and Korean Acute Heart Failure Registry (KorAHF)(26, 27) |

|                                                                         |                                            |                                                                                                                                                                                                                              |
|-------------------------------------------------------------------------|--------------------------------------------|------------------------------------------------------------------------------------------------------------------------------------------------------------------------------------------------------------------------------|
| Re-hospitalization                                                      | 0.0736                                     | Obtained from the THESUS-HF registry (25)                                                                                                                                                                                    |
| <b>Chronic events</b>                                                   |                                            |                                                                                                                                                                                                                              |
| Monthly risk of mortality                                               | 0.001–0.019 (Age- and sex-specific)#       | Calibrated based on GBD 2017 (21)                                                                                                                                                                                            |
| Reinfarction                                                            | 0.079 (0.073–0.085)ψ                       | Based on Steg et al. 2007 (28) and derived by Lin et al. 2019 (20)                                                                                                                                                           |
| Acute Stroke                                                            | 0.014 (0.012–0.016)ψ                       | Based on Steg et al. 2007 (28) and derived by Lin et al. 2019 (20)<br>Continue Or Stop post-Stroke Antihypertensives Collaborative Study (COSSACS) (29), BP reduction and secondary stroke prevention: systematic review(30) |
| <b>Stroke</b>                                                           |                                            |                                                                                                                                                                                                                              |
| Monthly risk of mortality                                               | 0.001–0.013 (Age- and sex specific)#       | Calibrated based on GBD 2017 (21)<br><br>Stroke Risk in Treated Hypertension Based on Home Blood Pressure: the Ohasama Study(31)                                                                                             |
| Acute MI                                                                | 0.043 (0.038–0.048)ψ                       | Based on Steg et al. 2007 (28) and derived by Lin et al. 2019 (20)                                                                                                                                                           |
| Acute Stroke                                                            | 0.037 (0.033–0.041)                        | Based on Steg et al. 2007 (28) and derived by Lin et al. 2019 (20)                                                                                                                                                           |
| Relative risk of fatality for an individual with two or more CVD events | 1.5                                        | Smolina et al. 2012 (32)                                                                                                                                                                                                     |
| <b>Heart failure</b>                                                    |                                            |                                                                                                                                                                                                                              |
| <b>Incidence</b>                                                        |                                            |                                                                                                                                                                                                                              |
| 1 year mortality                                                        |                                            |                                                                                                                                                                                                                              |
| Re-hospitalization                                                      |                                            | <b>Moita B.eta al. 2019(36) and (37)</b>                                                                                                                                                                                     |
| <b>Effect of antihypertensive medication</b>                            |                                            |                                                                                                                                                                                                                              |
| Medication protocol for an individual                                   | Initial SBP-specific#                      | Based on Ethiopian NCD control guideline                                                                                                                                                                                     |
| IHD relative risk due to medication                                     | 0.32–0.89 (Age- and initial SBP-specific)# | Based on findings by Law et al. 2009 (38) and Asayam Kei., 2017(39)                                                                                                                                                          |
| Stroke relative risk due to medication                                  | 0.20–0.89 (Age- and initial SBP-specific)# | Based on findings by Law et al. 2009(38)                                                                                                                                                                                     |
| IHD relative risk if partially adherent                                 | 0.66–0.95 (Age- and initial SBP-specific)  | Calculated based on a linear relationship between adherence and efficacy as considered by Cherry et al. 2009(40)                                                                                                             |
| Stroke relative risk if partially adherent                              | 0.60–0.95 (Age- and initial SBP-specific)  | Calculated based on a linear relationship between adherence and efficacy as considered by Cherry et al. 2009 (40) and Lisheng Liu, Zengwu Wang. et al(41)                                                                    |



**Supplementary Table 4:** Price of drugs, medical supplies, procedures and professional time used for management of hypertension in Southern Ethiopia, January, 2021

| List of medicines                                                                                        | Unit   | Price in 2021 Ethiopian birr |                          | Price USD                | Source                                                                                                                                                                      |
|----------------------------------------------------------------------------------------------------------|--------|------------------------------|--------------------------|--------------------------|-----------------------------------------------------------------------------------------------------------------------------------------------------------------------------|
|                                                                                                          |        | Wholesale price              | Retail price             | Retail Price in 2021 USD |                                                                                                                                                                             |
| Acetylsalicylic Acid - 81mg – Tablet (coated)                                                            | 10x10  | 43.72                        | 1.32                     | 1.303                    | Ethiopian<br>Pharmaceutica<br>l supply<br>agency, Arba<br>Minch Hub<br>wholesale<br>price 2021 and<br>Arba Minch<br>General<br>hospital<br>pharmacy<br>retail price<br>2021 |
| Adrenaline (Epinephrine)-0.1% in 1mL ampoule                                                             | Each   | 36.032                       | 1.09                     | 1.074                    |                                                                                                                                                                             |
| Amiodarone - 100mg – Tablet                                                                              | 10x3   | 313.34                       | 9.44                     | 9.337                    |                                                                                                                                                                             |
| Amlodipine - 10mg - Tablet                                                                               | 10x10  | 105.44                       | 3.18                     | 3.142                    |                                                                                                                                                                             |
| Amlodipine - 5mg – Tablet                                                                                | 10x10  | 75.26                        | 2.27                     | 2.243                    |                                                                                                                                                                             |
| Atenolol - 50mg – Tablet                                                                                 | 10x10  | 58.70                        | 1.77                     | 1.749                    |                                                                                                                                                                             |
| Atorvastatin - 20mg – Tablet                                                                             | 10x10  | 195.68                       | 5.89                     | 5.831                    |                                                                                                                                                                             |
| Atorvastatin - 40mg – Tablet                                                                             | 10x3   | 140.76                       | 4.24                     | 4.195                    |                                                                                                                                                                             |
| Beclomethasone Propionate -100mcg/dose – Aerosol                                                         | 200 MD | 131.85                       | 3.97                     | 3.929                    |                                                                                                                                                                             |
| Candesartan - 8mg – Tablet                                                                               | 14x2   | 152.63                       | 4.60                     | 4.548                    |                                                                                                                                                                             |
| Captopril - 12.5mg – Tablet                                                                              | 10x10  | 33.54                        | 1.01                     | 1.000                    |                                                                                                                                                                             |
| Captopril - 25mg – Tablet                                                                                | 10x10  | 26.91                        | 0.81                     | 0.802                    |                                                                                                                                                                             |
| Dexamethasone - 4mg/ml in 1ml Ampoule - Injection                                                        | 10     | 3.95                         | 0.12                     | 0.118                    |                                                                                                                                                                             |
| Captopril + HCT (50mg + 25mg)-Tablet                                                                     | 10x10  | 57.32                        | 1.73                     | 1.708                    |                                                                                                                                                                             |
| Digoxin - 0.25mg – Tablet                                                                                | 10x10  | 202.18                       | 6.09                     | 6.025                    |                                                                                                                                                                             |
| Enalapril Maleate - 10mg - Tablet                                                                        | 10x10  | 61.57                        | 1.85                     | 1.835                    |                                                                                                                                                                             |
| Enalapril Maleate - 5mg – Tablet                                                                         | 10x10  | 63.92                        | 1.93                     | 1.905                    |                                                                                                                                                                             |
| Enalapril Maleate – 2.5mg – Tablet                                                                       | 10x10  | 19.98                        | 0.60                     | 0.595                    |                                                                                                                                                                             |
| Enalapril Maleate +HCT (10 mg + 25 mg)-tablet                                                            | 10x10  | 78.22                        | 2.36                     | 2.331                    |                                                                                                                                                                             |
| Glibenclamide - 5mg – Tablet                                                                             | 10x10  | 39.09                        | 1.18                     | 1.165                    |                                                                                                                                                                             |
| Glucose 40% in 20 mL – IV infusion                                                                       | Each   | 2.54                         | 0.08                     | 0.076                    |                                                                                                                                                                             |
| Glyceryl Trinitrate - 0.4mg – Tablet (Sublingual)                                                        | 100    | 487.21                       | 14.67                    | 14.518                   |                                                                                                                                                                             |
| Hydralazine - 20mg/ml in 1ml ampoule - Injection                                                         | 5      | 204.01                       | 6.14                     | 6.079                    |                                                                                                                                                                             |
| Hydrochlorothiazide - 25mg – Tablet                                                                      | 25x4   | 48.05                        | 1.45                     | 1.432                    |                                                                                                                                                                             |
| Insulin Isophane Biphasic (Soluble/Isophane Mixture)- (30 + 70)IU/ml in 10ml Vial -Injection(Suspension) | Each   | 85.20                        | 2.57                     | 2.539                    |                                                                                                                                                                             |
| Insulin Isophane Human - 100IU/ml in 10ml Vial - Injection(Suspension)                                   | Each   | 100.28                       | 3.02                     | 2.988                    |                                                                                                                                                                             |
| Insulin Soluble Human - 100IU/ml in 10ml Vial                                                            | Each   | 106.21                       | 3.20                     | 3.165                    |                                                                                                                                                                             |
| Lovastatin - 20mg – Tablet                                                                               | 10x10  | 84.59                        | 2.55                     | 2.521                    |                                                                                                                                                                             |
| Metformin - 500mg – Tablet                                                                               | 10     | 27.78                        | 0.84                     | 0.828                    |                                                                                                                                                                             |
| Methyldopa - 250mg – Tablet                                                                              | 100x10 | 51.75                        | 1.56                     | 1.542                    |                                                                                                                                                                             |
| Metoprolol - 50mg – Tablet                                                                               | 10x10  | 94.43                        | 2.84                     | 2.814                    |                                                                                                                                                                             |
| Morphine sulphate-30mg-tablet                                                                            | 110    | 410.71                       | 12.37                    | 12.239                   |                                                                                                                                                                             |
| Nifedipine - 20mg – Tablet                                                                               | 10x10  | 58.70                        | 1.77                     | 1.749                    |                                                                                                                                                                             |
| Prednisolone - 5 mg – Tablet                                                                             | 100x10 | 342.23                       | 10.31                    | 10.198                   |                                                                                                                                                                             |
| Propranolol - 40mg – Tablet                                                                              | 10x10  | 67.54                        | 2.03                     | 2.013                    |                                                                                                                                                                             |
| Propylthiouracil - 100mg - Tablet (Scored)                                                               | 100    | 633.87                       | 19.09                    | 18.889                   |                                                                                                                                                                             |
| Salbutamol - 0.1mg/dose - Aerosol (Oral Inhalation)                                                      | 200 MD | 117.20                       | 3.53                     | 3.492                    |                                                                                                                                                                             |
| Spironolactone - 25mg – Tablet                                                                           | 10x10  | 81.87                        | 2.47                     | 2.440                    |                                                                                                                                                                             |
| Thyroxin Sodium - 0.1mg – Tablet                                                                         | 100    | 178.49                       | 5.38                     | 5.319                    |                                                                                                                                                                             |
| Valsartan + HCT (80mg +12.5mg)                                                                           | 7*2    | 38.47                        | 1.16                     | 1.146                    |                                                                                                                                                                             |
| <b>Laboratory and imaging costs</b>                                                                      |        | <b>Price per test ETB</b>    | <b>Price in 2021 USD</b> |                          | Arba Minch<br>General<br>Hospital<br>Laboratory<br>service price<br>2021                                                                                                    |
| CBC                                                                                                      |        | 75.00                        | 1.72                     |                          |                                                                                                                                                                             |
| FBG/RBS                                                                                                  |        | 20.00                        | 0.46                     |                          |                                                                                                                                                                             |
| Lipid profile (LDL, HDL, Total cholesterol, Triglyceride)                                                |        | 160.00                       | 3.68                     |                          |                                                                                                                                                                             |
| ECG                                                                                                      |        | 120.00                       | 2.76                     |                          |                                                                                                                                                                             |
| ECO                                                                                                      |        | 350.00                       | 8.05                     |                          |                                                                                                                                                                             |
| CT-scan                                                                                                  |        | 1200                         | 27.59                    |                          |                                                                                                                                                                             |
| RFT (bilirubin, creatinine)                                                                              |        | 80.00                        | 1.84                     |                          |                                                                                                                                                                             |
| Chest-ray                                                                                                |        | 726                          | 16.69                    |                          |                                                                                                                                                                             |
| Urine analysis                                                                                           |        | 15.00                        | 0.34                     |                          |                                                                                                                                                                             |
| Body fluid analysis                                                                                      |        | 100.00                       | 2.30                     |                          |                                                                                                                                                                             |
| H. pylori                                                                                                |        | 50.00                        | 1.15                     |                          |                                                                                                                                                                             |

|                                                                                     |                                                                 |                                                                                                                                             |                                  |
|-------------------------------------------------------------------------------------|-----------------------------------------------------------------|---------------------------------------------------------------------------------------------------------------------------------------------|----------------------------------|
| Liver function test (AST, ALT, ALP)                                                 | 120.00                                                          | 2.76                                                                                                                                        |                                  |
| Thyroid function test (T3, T4, TSH)                                                 | 432.00                                                          | 9.93                                                                                                                                        |                                  |
| <b>Hospital bed days</b>                                                            |                                                                 |                                                                                                                                             |                                  |
| Primary hospital                                                                    | 52.52                                                           | 1.21                                                                                                                                        | WHO Choice (42) inflated to 2021 |
| Secondary hospital                                                                  | 54.76                                                           | 1.26                                                                                                                                        |                                  |
| Tertiary hospital                                                                   | 70.81                                                           | 1.63                                                                                                                                        |                                  |
| <b>Health facility visit</b>                                                        |                                                                 | 0.00                                                                                                                                        |                                  |
| Primary hospital                                                                    | 18.58                                                           | 0.43                                                                                                                                        |                                  |
| Secondary hospital                                                                  | 21.17                                                           | 0.49                                                                                                                                        |                                  |
| Tertiary hospital                                                                   | 22.06                                                           | 0.51                                                                                                                                        |                                  |
| Health center visit                                                                 | 23.00                                                           | 0.53                                                                                                                                        |                                  |
| PCI intervention                                                                    | 63,000.00                                                       | 1448.28                                                                                                                                     |                                  |
| In-patient costs for MI                                                             | 45240.00                                                        | 1040.00                                                                                                                                     |                                  |
| In-patient costs for Stroke                                                         | 40890.00                                                        | 940.00                                                                                                                                      |                                  |
| Outpatient cost for IHD (per annum)                                                 | 1957.50                                                         | 45.00                                                                                                                                       |                                  |
| Outpatient cost for Stroke (per annum)                                              | 2914.50                                                         | 67.00                                                                                                                                       |                                  |
| <b>Salary scale of human resource</b>                                               |                                                                 | 0.00                                                                                                                                        |                                  |
| Physician                                                                           | 21,100.00                                                       | 485.06                                                                                                                                      | MOH, Ethiopia 2012/2019 (43).    |
| Acute care nurse                                                                    | 7470.00                                                         | 171.72                                                                                                                                      |                                  |
| Pharmacy personnel                                                                  | 8047.00                                                         | 184.99                                                                                                                                      |                                  |
| Laboratory technician                                                               | 6460.00                                                         | 148.51                                                                                                                                      |                                  |
| Program cost per person per annum                                                   | 993.29                                                          | 22.83                                                                                                                                       |                                  |
| <b>Antihypertensive treatment</b>                                                   |                                                                 |                                                                                                                                             |                                  |
| Antihypertensive medication (per individual per annum)                              | Drug costs based on national Drug supply agency wholesale price |                                                                                                                                             |                                  |
| Out-patient consultations (per visit)                                               | \$43.36                                                         | Annual outpatient visit cost (12*WHO cost per outpatient visit inflated to 2021) WHO Choice (42)                                            |                                  |
| One-time diagnostic tests                                                           |                                                                 | Based on Laboratory procedures and test price of Arba Minch General Hospital, 2021                                                          |                                  |
| In-patient costs for MI                                                             | \$1040                                                          | WHO Choice (42) inflated to 2021                                                                                                            |                                  |
| In-patient costs for Stroke                                                         | \$940                                                           |                                                                                                                                             |                                  |
| <b>Chronic CVD care</b>                                                             |                                                                 |                                                                                                                                             |                                  |
| Secondary care medication in public sector (per individual per annum)               | \$92, \$184 (Dosage-specific)§                                  | MSH-2015 International Drug Price Indicator inflated to 2021(25)                                                                            |                                  |
| Outpatient cost for IHD (per annum)                                                 | \$45                                                            | WHO Choice (44) inflated to 2021                                                                                                            |                                  |
| Outpatient cost for Stroke (per annum)                                              | \$67                                                            |                                                                                                                                             |                                  |
| Average inflation rate Ethiopia                                                     | 16.58%                                                          | <a href="https://take-profit.org/en/statistics/inflation-rate/ethiopia/">https://take-profit.org/en/statistics/inflation-rate/ethiopia/</a> |                                  |
| Average inflation rate foreign                                                      | 2.02%                                                           |                                                                                                                                             |                                  |
| Percentage change                                                                   | 24.6%                                                           |                                                                                                                                             |                                  |
| Exchange rate July 2021 (1USD)                                                      | 43.5 ETB                                                        |                                                                                                                                             |                                  |
| 1USD = 20.999 ETB in 2016 and 43.5 in 2021; PPP= 12.1/8.1 = 1.5                     |                                                                 |                                                                                                                                             |                                  |
| MD: metered Dose; MOH: Ministry of Health 1 USD = 43.5 January 2021                 |                                                                 |                                                                                                                                             |                                  |
| <b>Note:</b> 30% mark-up at regional EPSA hub, 31% mark-up at Public Hospital level |                                                                 |                                                                                                                                             |                                  |

**Supplementary Table 5:** Risk of death across age and gender covariate categories stratified for hypertension

| Variables                         | Categories           | Incidence of death (%) |                | Relative risk in each category (CI) | Source |
|-----------------------------------|----------------------|------------------------|----------------|-------------------------------------|--------|
|                                   |                      | High BP group          | Normal         |                                     |        |
| Age                               | 20-29                | 1.68%                  | 0.54%          | 3.11 (1.16-8.36)                    | (8)    |
|                                   | 30-39                | 1.71%                  | 0.94%          | 1.82 (1.04-3.19)                    |        |
|                                   | 40-49                | 2.43%                  | 1.88%          | 1.29 (0.91-1.82)                    |        |
|                                   | 50-59                | 6.30%                  | 4.03%          | 1.56 (1.28-1.91)                    |        |
|                                   | 60 and above         | 19.32%                 | 15.9%          | 1.21 (1.12-1.31)                    |        |
| Gender                            | Women                | 8.71%                  | 1.1%           | 3.31 (2.98-3.68)                    |        |
|                                   | Men                  | 15.47%                 | 4.62%          | 3.34(3.02-3.70)                     |        |
| <b>Risk of all case mortality</b> |                      |                        |                |                                     |        |
| Gender                            | Treatment status     | < 60 years             | > 60 years     | HR (95% CI)                         | (45)   |
| Men                               | Normal               | <b>0.0068</b>          | <b>0.0214</b>  | 1.00 (Reference)                    |        |
|                                   | Treated controlled   | <b>0.0188</b>          | <b>0.0305</b>  | 1.20 (0.92-1.57)                    |        |
|                                   | Treated uncontrolled | <b>0.0252</b>          | <b>0.0372</b>  | 1.55 (1.19-2.01)                    |        |
|                                   | Untreated            | <b>0.0197</b>          | <b>0.0336</b>  | 1.45 (1.23-1.72)                    |        |
| Women                             | Normal               | <b>0.00528</b>         | <b>0.01870</b> | 1.00 (Reference)                    |        |
|                                   | Treated controlled   | <b>0.01675</b>         | <b>0.02841</b> | 1.11 (0.84-1.47)                    |        |
|                                   | Treated uncontrolled | <b>0.02533</b>         | <b>0.03736</b> | 1.63 (1.34-1.99)                    |        |
|                                   | Untreated            | <b>0.02075</b>         | <b>0.03471</b> | 1.31 (1.06-1.61)                    |        |

**Supplementary Table 6:** Annual mortality rate in the total population, those with hypertension by treatment and control status and those without hypertension in Ethiopia in 2021 by age group and sex based on literature review of systematic reviews and clinical trials

| Age group    | Mortality rate in the total population | Mortality rate among people without hypertension | Mortality rate among people with treated and controlled hypertension | Mortality rate among people with treated but uncontrolled hypertension | Mortality rate among people with untreated hypertension | References                                                                      |
|--------------|----------------------------------------|--------------------------------------------------|----------------------------------------------------------------------|------------------------------------------------------------------------|---------------------------------------------------------|---------------------------------------------------------------------------------|
| <b>Women</b> |                                        |                                                  |                                                                      |                                                                        |                                                         |                                                                                 |
| 15-19        | 0.00222                                | 0.00222                                          | 0.016746                                                             | 0.025                                                                  | 0.02075                                                 | Ko, Min Jung, et al. 2016 (46), Mende Sorato, et al, 2021. (1, 23, 45, 47, 48). |
| 20-24        | 0.00223                                | 0.00223                                          | 0.016746                                                             | 0.025                                                                  | 0.02075                                                 |                                                                                 |
| 25-29        | 0.00232                                | 0.00232                                          | 0.016746                                                             | 0.025                                                                  | 0.02075                                                 |                                                                                 |
| 30-34        | 0.00368                                | 0.00368                                          | 0.016746                                                             | 0.025                                                                  | 0.02075                                                 |                                                                                 |
| 35-39        | 0.00222                                | 0.00222                                          | 0.016746                                                             | 0.025                                                                  | 0.02075                                                 |                                                                                 |
| 40-44        | 0.00385                                | 0.00385                                          | 0.016746                                                             | 0.025                                                                  | 0.02075                                                 |                                                                                 |
| 45-49        | 0.00457                                | 0.00457                                          | 0.016746                                                             | 0.025                                                                  | 0.02075                                                 |                                                                                 |
| 50-54        | 0.00182                                | 0.00182                                          | 0.016746                                                             | 0.025                                                                  | 0.02075                                                 |                                                                                 |
| 55-59        | 0.00182                                | 0.00182                                          | 0.016746                                                             | 0.025                                                                  | 0.02075                                                 |                                                                                 |
| 60 -64       | 0.00441                                | 0.00441                                          | 0.028414                                                             | 0.037                                                                  | 0.03471                                                 |                                                                                 |
| <b>Men</b>   |                                        |                                                  |                                                                      |                                                                        |                                                         |                                                                                 |
| 15-19        | 0.00286                                | 0.00286                                          | 0.018783                                                             | 0.025                                                                  | 0.01969                                                 | Kuriakose A. et al. 2014. (8), EDHS, 2016 (7, 45, 47-50)                        |
| 20-24        | 0.00319                                | 0.00319                                          | 0.018783                                                             | 0.025                                                                  | 0.01969                                                 |                                                                                 |
| 25-29        | 0.00293                                | 0.00293                                          | 0.018783                                                             | 0.025                                                                  | 0.01969                                                 |                                                                                 |
| 30-34        | 0.00397                                | 0.00397                                          | 0.018783                                                             | 0.025                                                                  | 0.01969                                                 |                                                                                 |
| 35-39        | 0.00411                                | 0.00411                                          | 0.018783                                                             | 0.025                                                                  | 0.01969                                                 |                                                                                 |
| 40-44        | 0.00584                                | 0.00584                                          | 0.018783                                                             | 0.025                                                                  | 0.01969                                                 |                                                                                 |
| 45-49        | 0.0036                                 | 0.0036                                           | 0.018783                                                             | 0.025                                                                  | 0.01969                                                 |                                                                                 |
| 50-54        | 0.00354                                | 0.00354                                          | 0.018783                                                             | 0.025                                                                  | 0.01969                                                 |                                                                                 |
| 55-59        | 0.00354                                | 0.00354                                          | 0.018783                                                             | 0.025                                                                  | 0.01969                                                 |                                                                                 |
| 60-64        | 0.00354                                | 0.00354                                          | 0.030451                                                             | 0.037                                                                  | 0.03365                                                 |                                                                                 |

## References

1. Sorato MM, Davari M, Kebriaeezadeh A, Sarrafzadegan N, Shibru T, Fatemi B. Risk of fatal and nonfatal coronary heart disease and stroke events among adult patients with hypertension: basic Markov model inputs for evaluating cost-effectiveness of hypertension treatment: systematic review of cohort studies. *Journal of Pharmaceutical Health Services Research*. 2021;12(2).
2. Institute. EPH. Ethiopia steps report on risk factors for chronic non-communicable diseases and prevalence of selected NCDs. 2016.
3. Kelemu Tilahun Kibret, Mesfin YM. Prevalence of hypertension in Ethiopia: a systematic meta-analysis. *Public Health Reviews* 2015;36(14).
4. WHO. Non-communicable diseases country profiles 2018. Geneva: World Health Organization. 2018.
5. Helelo TP GY, Adane AA. Prevalence and Associated Factors of Hypertension among Adults in Durame Town, Southern Ethiopia. *PLoS ONE*. 2014;9(11):e112790.
6. Shukuri A, Tewelde T, Shaweno T. Prevalence of old age hypertension and associated factors among older adults in rural Ethiopia. *Integrated blood pressure control*. 2019;12:23-31.
7. ICF C. Ethiopia Demographic and Health Survey 2016, Addis Ababa, Ethiopia, and Rockville, Maryland, USA: CSA and ICF. DF-1.6.
8. Kuriakose A, Nair Anish TS, Soman B, Varghese RT, Sreelal TP, Mendez AM, et al. Rate and Risk of All Cause Mortality among People with Known Hypertension in a Rural Community of Southern Kerala, India: The Results from the Prolife Cohort. *Int J Prev Med*. 2014;5(5):596-603.
9. Getachew F DA, Solomon D. Prevalence of Undiagnosed Hypertension and Associated Factors among Residents in Gulele Sub-City, Addis Ababa, Ethiopia. *J Community Med Health Educ*. 2018;8(590).
10. Antikainen R, Jousilahti P, Tuomilehto J. Systolic blood pressure, isolated systolic hypertension and risk of coronary heart disease, strokes, cardiovascular disease and all-cause mortality in the middle-aged population. *Journal of hypertension*. 1998;16(5):577-83.
11. Ford ES, Giles WH, Mokdad AH. The distribution of 10-year risk for coronary heart disease among US adults: findings from the National Health and Nutrition Examination Survey III. *Journal of the American College of Cardiology*. 2004;43(10):1791-6.
12. Collaborators GRF. Global, regional, and national comparative risk assessment of 84 behavioural, environmental and occupational, and metabolic risks or clusters of risks for 195 countries and territories, 1990–2017: a systematic analysis for the Global Burden of Disease Study 2017. *Lancet (London, England)*. 2018;392(10159):1923.
13. Flint AC, Conell C, Ren X, Banki NM, Chan SL, Rao VA, et al. Effect of systolic and diastolic blood pressure on cardiovascular outcomes. *New England Journal of Medicine*. 2019;381(3):243-51.
14. Rapsomaniki E, Timmis A, George J, Pujades-Rodriguez M, Shah AD, Denaxas S, et al. Blood pressure and incidence of twelve cardiovascular diseases: lifetime risks, healthy life-years lost, and age-specific associations in 1·25 million people. *The Lancet*. 2014;383(9932):1899-911.
15. Lloyd-Jones DM, Larson MG, Beiser A, Levy D. Lifetime risk of developing coronary heart disease. *The Lancet*. 1999;353(9147):89-92.
16. Organization WH. Disability weights, discounting and age weighting of DALYs. Available; 2016.
17. Salomon JA, Haagsma JA, Davis A, de Noordhout CM, Polinder S, Havelaar AH, et al. Disability weights for the Global Burden of Disease 2013 study. *The Lancet Global Health*. 2015;3(11):e712-e23.
18. Vos T, Allen C, Arora M, Barber RM, Bhutta ZA, Brown A, et al. Global, regional, and national incidence, prevalence, and years lived with disability for 310 diseases and injuries, 1990–2015: a systematic analysis for the Global Burden of Disease Study 2015. *The Lancet*. 2016;388(10053):1545-602.
19. Salomon JA, Vos T, Hogan DR, Gagnon M, Naghavi M, Mokdad A, et al. Common values in assessing health outcomes from disease and injury: disability weights measurement study for the Global Burden of Disease Study 2010. *Lancet (London, England)*. 2012;380(9859):2129-43.
20. Lin JK, Moran AE, Bibbins-Domingo K, Falase B, Pedroza Tobias A, Mandke CN, et al. Cost-effectiveness of a fixed-dose combination pill for secondary prevention of cardiovascular disease in China, India, Mexico, Nigeria, and South Africa: a modelling study. *The Lancet Global health*. 2019;7(10):e1346-e58.

21. Global, regional, and national age-sex-specific mortality for 282 causes of death in 195 countries and territories, 1980-2017: a systematic analysis for the Global Burden of Disease Study 2017. *Lancet* (London, England). 2018;392(10159):1736-88.
22. Huffman MD, Mohanan PP, Devarajan R, Baldrige AS, Kondal D, Zhao L, et al. Effect of a Quality Improvement Intervention on Clinical Outcomes in Patients in India With Acute Myocardial Infarction: The ACS QUIK Randomized Clinical Trial. *Jama*. 2018;319(6):567-78.
23. Bundy JD, Li C, Stuchlik P, Bu X, Kelly TN, Mills KT, et al. Systolic Blood Pressure Reduction and Risk of Cardiovascular Disease and Mortality: A Systematic Review and Network Meta-analysis. *JAMA Cardiology*. 2017;2(7):775-81.
24. Petty GW, Brown RD, Jr., Whisnant JP, Sicks JD, O'Fallon WM, Wiebers DO. Survival and recurrence after first cerebral infarction: a population-based study in Rochester, Minnesota, 1975 through 1989. *Neurology*. 1998;50(1):208-16.
25. Health MSf. *International Medical Products Price Guide: 2015 edition*. 2015.
26. Lee SE, Lee HY, Cho HJ, Choe WS, Kim H, Choi JO, et al. Clinical Characteristics and Outcome of Acute Heart Failure in Korea: Results from the Korean Acute Heart Failure Registry (KorAHF). *Korean circulation journal*. 2017;47(3):341-53.
27. Choi DJ, Han S, Jeon ES, Cho MC, Kim JJ, Yoo BS, et al. Characteristics, outcomes and predictors of long-term mortality for patients hospitalized for acute heart failure: a report from the Korean heart failure registry. *Korean circulation journal*. 2011;41(7):363-71.
28. Steg PG, Bhatt DL, Wilson PWF, D'Agostino R, Ohman EM, Röther J, et al. One-Year Cardiovascular Event Rates in Outpatients With Atherothrombosis. *Jama*. 2007;297(11):1197-206.
29. Robinson TG, Potter JF, Ford GA, Bulpitt CJ, Chernova J, Jagger C, et al. Effects of antihypertensive treatment after acute stroke in the Continue Or Stop post-Stroke Antihypertensives Collaborative Study (COSSACS): a prospective, randomised, open, blinded-endpoint trial. *The Lancet Neurology*. 2010;9(8):767-75.
30. Katsanos AH, Filippatou A, Manios E, Deftereos S, Parissis J, Frogoudaki A, et al. Blood Pressure Reduction and Secondary Stroke Prevention. *Hypertension*. 2017;69(1):171-9.
31. Yasui D, Asayama K, Ohkubo T, Kikuya M, Kanno A, Hara A, et al. Stroke Risk in Treated Hypertension Based on Home Blood Pressure: the Ohasama Study. *American Journal of Hypertension*. 2010;23(5):508-14.
32. Smolina K, Wright FL, Rayner M, Goldacre MJ. Long-Term Survival and Recurrence After Acute Myocardial Infarction in England, 2004 to 2010. *Circulation: Cardiovascular Quality and Outcomes*. 2012;5(4):532-40.
33. Butler J, Kalogeropoulos AP, Georgiopoulou VV, Bibbins-Domingo K, Najjar SS, Sutton-Tyrrell KC, et al. Systolic blood pressure and incident heart failure in the elderly. The Cardiovascular Health Study and the Health, Ageing and Body Composition Study. *Heart*. 2011;97(16):1304.
34. Piller LB, Baraniuk S, Simpson LM, Cushman WC, Massie BM, Einhorn PT, et al. Long-term follow-up of participants with heart failure in the antihypertensive and lipid-lowering treatment to prevent heart attack trial (ALLHAT). *Circulation*. 2011;124(17):1811-8.
35. Davis BR, Kostis JB, Simpson LM, Black HR, Cushman WC, Einhorn PT, et al. Heart Failure With Preserved and Reduced Left Ventricular Ejection Fraction in the Antihypertensive and Lipid-Lowering Treatment to Prevent Heart Attack Trial. *Circulation*. 2008;118(22):2259-67.
36. Moita B, Marques AP, Camacho AM, Leão Neves P, Santana R. One-year rehospitalisations for congestive heart failure in Portuguese NHS hospitals: a multilevel approach on patterns of use and contributing factors. *BMJ open*. 2019;9(9):e031346.
37. Chamberlain AM, Dunlay SM, Gerber Y, Manemann SM, Jiang R, Weston SA, et al. Burden and Timing of Hospitalizations in Heart Failure: A Community Study. *Mayo Clinic proceedings*. 2017;92(2):184-92.
38. Law MR, Morris JK, Wald NJ. Use of blood pressure lowering drugs in the prevention of cardiovascular disease: meta-analysis of 147 randomised trials in the context of expectations from prospective epidemiological studies. *BMJ (Clinical research ed)*. 2009;338:b1665.
39. Asayama K. Observational study and participant-level meta-analysis on antihypertensive drug treatment-related cardiovascular risk. *Hypertension Research*. 2017;40(10):856-60.



- 1  
2  
3 40. Cherry SB, Benner JS, Hussein MA, Tang SSK, Nichol MB. The Clinical and Economic Burden of  
4 Nonadherence with Antihypertensive and Lipid-Lowering Therapy in Hypertensive Patients. *Value in Health*.  
5 2009;12(4):489-97.
- 6 41. Liu L, Wang Z, Gong L, Zhang Y, Thijs L, Staessen JA, et al. Blood pressure reduction for the  
7 secondary prevention of stroke: a Chinese trial and a systematic review of the literature. *Hypertension Research*.  
8 2009;32(11):1032-40.
- 9 42. Stenberg K, Lauer JA, Gkoutouras G, Fitzpatrick C, Stanciole A. Econometric estimation of WHO-  
10 CHOICE country-specific costs for inpatient and outpatient health service delivery. *Cost Effectiveness and*  
11 *Resource Allocation*. 2018;16(1):11.
- 12 43. Health FMO. National strategic action plan (NSAP) for prevention & control of non-communicable  
13 diseases in Ethiopia, 2014-2016. 2014:43-7.
- 14 44. Organization WH. WHO-CHOICE Estimates of Cost for Inpatient and Outpatient Health Service  
15 Delivery.
- 16 45. Zhou D, Xi B, Zhao M, Wang L, Veeranki SP. Uncontrolled hypertension increases risk of all-cause  
17 and cardiovascular disease mortality in US adults: the NHANES III Linked Mortality Study. *Sci Rep*.  
18 2018;8(1):9418.
- 19 46. Ko MJ, Jo AJ, Park CM, Kim HJ, Kim YJ, Park D-W. Level of blood pressure control and  
20 cardiovascular events: SPRINT criteria versus the 2014 hypertension recommendations. *Journal of the*  
21 *American College of Cardiology*. 2016;67(24):2821-31.
- 22 47. Gu Q, Dillon CF, Burt VL, Gillum RF. Association of Hypertension Treatment and Control With All-  
23 Cause and Cardiovascular Disease Mortality Among US Adults With Hypertension. *American Journal of*  
24 *Hypertension*. 2010;23(1):38-45.
- 25 48. Murakami Y, Hozawa A, Okamura T, Ueshima H. Relation of Blood Pressure and All-Cause Mortality  
26 in 180 000 Japanese Participants. *Hypertension*. 2008;51(6):1483-91.
- 27 49. Nagai K, Yamagata K, Iseki K, Moriyama T, Tsuruya K, Fujimoto S, et al. Antihypertensive treatment  
28 and risk of cardiovascular mortality in patients with chronic kidney disease diagnosed based on the presence of  
29 proteinuria and renal function: A large longitudinal study in Japan. *PLoS One*. 2019;14(12):e0225812.
- 30 50. Gudmundsson LS, Johannsson M, Thorgeirsson G, Sigfusson N, Sigvaldason H, Wittelman JCM. Risk  
31 profiles and prognosis of treated and untreated hypertensive men and women in a population-based  
32 longitudinal study The Reykjavik Study. *Journal of Human Hypertension*. 2004;18(9):615-22.
- 33  
34  
35  
36  
37  
38  
39  
40  
41  
42  
43  
44  
45  
46  
47  
48  
49  
50  
51  
52  
53  
54  
55  
56  
57  
58  
59  
60



# Reporting checklist for economic evaluation of health interventions.

Based on the CHEERS guidelines.

## Instructions to authors

Complete this checklist by entering the page numbers from your manuscript where readers will find each of the items listed below.

Your article may not currently address all the items on the checklist. Please modify your text to include the missing information. If you are certain that an item does not apply, please write "n/a" and provide a short explanation.

Upload your completed checklist as an extra file when you submit to a journal.

In your methods section, say that you used the CHEERS reporting guidelines, and cite them as:

Husereau D, Drummond M, Petrou S, Carswell C, Moher D, Greenberg D, Augustovski F, Briggs AH, Mauskopf J, Loder E. Consolidated Health Economic Evaluation Reporting Standards (CHEERS) statement.

| Title | Reporting Item                                                                                                                                                                    | Page Number |
|-------|-----------------------------------------------------------------------------------------------------------------------------------------------------------------------------------|-------------|
|       | <p><a href="#">#1</a> Identify the study as an economic evaluation or use more specific terms such as “cost-effectiveness analysis”, and describe the interventions compared.</p> | 1           |

## Abstract

**#2** Provide a structured summary of objectives, perspective, setting, methods (including study design and inputs), results (including base case and uncertainty analyses), and conclusions

## Introduction

**#3** Provide an explicit statement of the broader context for the study. Present the study question and its relevance for health policy or practice decisions

## Methods

**#4** Describe characteristics of the base case population and subgroups analysed, including why they were chosen.

**#5** State relevant aspects of the system(s) in which the decision(s) need(s) to be made.

**#6** Describe the perspective of the study and relate this to the costs being evaluated.

**#7** Describe the interventions or strategies being compared and state why they were chosen.

|    |                        |                     |                                                      |     |
|----|------------------------|---------------------|------------------------------------------------------|-----|
| 1  | Time horizon           | <a href="#">#8</a>  | State the time horizon(s) over which costs and       | 2   |
| 2  |                        |                     |                                                      |     |
| 3  |                        |                     |                                                      |     |
| 4  |                        |                     | consequences are being evaluated and say why         |     |
| 5  |                        |                     |                                                      |     |
| 6  |                        |                     | appropriate.                                         |     |
| 7  |                        |                     |                                                      |     |
| 8  |                        |                     |                                                      |     |
| 9  | Discount rate          | <a href="#">#9</a>  | Report the choice of discount rate(s) used for costs | 10  |
| 10 |                        |                     |                                                      |     |
| 11 |                        |                     | and outcomes and say why appropriate                 |     |
| 12 |                        |                     |                                                      |     |
| 13 |                        |                     |                                                      |     |
| 14 | Choice of health       | <a href="#">#10</a> | Describe what outcomes were used as the              | NA  |
| 15 |                        |                     |                                                      |     |
| 16 | outcomes               |                     | measure(s) of benefit in the evaluation and their    |     |
| 17 |                        |                     |                                                      |     |
| 18 |                        |                     | relevance for the type of analysis performed         |     |
| 19 |                        |                     |                                                      |     |
| 20 |                        |                     |                                                      |     |
| 21 |                        |                     |                                                      |     |
| 22 | Measurement of         | <a href="#">#11</a> | Single study-based estimates: Describe fully the     | 4-6 |
| 23 |                        |                     |                                                      |     |
| 24 | effectiveness          | <a href="#">a</a>   | design features of the single effectiveness study    |     |
| 25 |                        |                     |                                                      |     |
| 26 |                        |                     | and why the single study was a sufficient source of  |     |
| 27 |                        |                     |                                                      |     |
| 28 |                        |                     | clinical effectiveness data                          |     |
| 29 |                        |                     |                                                      |     |
| 30 |                        |                     |                                                      |     |
| 31 |                        |                     |                                                      |     |
| 32 | Measurement of         | <a href="#">#11</a> | Synthesis-based estimates: Describe fully the        | NA  |
| 33 |                        |                     |                                                      |     |
| 34 | effectiveness          | <a href="#">b</a>   | methods used for identification of included studies  |     |
| 35 |                        |                     |                                                      |     |
| 36 |                        |                     | and synthesis of clinical effectiveness data         |     |
| 37 |                        |                     |                                                      |     |
| 38 |                        |                     |                                                      |     |
| 39 | Measurement and        | <a href="#">#12</a> | If applicable, describe the population and methods   | NA  |
| 40 |                        |                     |                                                      |     |
| 41 | valuation of           |                     | used to elicit preferences for outcomes.             |     |
| 42 |                        |                     |                                                      |     |
| 43 |                        |                     |                                                      |     |
| 44 | preference based       |                     |                                                      |     |
| 45 |                        |                     |                                                      |     |
| 46 | outcomes               |                     |                                                      |     |
| 47 |                        |                     |                                                      |     |
| 48 |                        |                     |                                                      |     |
| 49 | **Estimating resources |                     |                                                      |     |
| 50 |                        |                     |                                                      |     |
| 51 |                        |                     |                                                      |     |
| 52 | and costs **           |                     |                                                      |     |
| 53 |                        |                     |                                                      |     |
| 54 |                        |                     |                                                      |     |
| 55 |                        | <a href="#">#13</a> | Single study-based economic evaluation: Describe     | NA  |
| 56 |                        |                     |                                                      |     |
| 57 |                        | <a href="#">a</a>   | approaches used to estimate resource use             |     |
| 58 |                        |                     |                                                      |     |
| 59 |                        |                     |                                                      |     |
| 60 |                        |                     |                                                      |     |

1 associated with the alternative interventions.

2 Describe primary or secondary research methods  
3  
4  
5 for valuing each resource item in terms of its unit  
6  
7 cost. Describe any adjustments made to  
8  
9 approximate to opportunity costs  
10

## 11 12 13 **Methods**

|    |                       |                     |                                                     |
|----|-----------------------|---------------------|-----------------------------------------------------|
| 14 |                       |                     |                                                     |
| 15 |                       |                     |                                                     |
| 16 | Estimating resources  | <a href="#">#13</a> | Model-based economic evaluation: Describe           |
| 17 |                       |                     |                                                     |
| 18 | and costs             | <a href="#">b</a>   | approaches and data sources used to estimate        |
| 19 |                       |                     | resource use associated with model health states.   |
| 20 |                       |                     | Describe primary or secondary research methods      |
| 21 |                       |                     | for valuing each resource item in terms of its unit |
| 22 |                       |                     | cost. Describe any adjustments made to              |
| 23 |                       |                     | approximate to opportunity costs.                   |
| 24 |                       |                     |                                                     |
| 25 |                       |                     |                                                     |
| 26 |                       |                     |                                                     |
| 27 |                       |                     |                                                     |
| 28 |                       |                     |                                                     |
| 29 |                       |                     |                                                     |
| 30 |                       |                     |                                                     |
| 31 |                       |                     |                                                     |
| 32 | Currency, price date, | <a href="#">#14</a> | Report the dates of the estimated resource          |
| 33 |                       |                     | quantities and unit costs. Describe methods for     |
| 34 | and conversion        |                     | adjusting estimated unit costs to the year of       |
| 35 |                       |                     | reported costs if necessary. Describe methods for   |
| 36 |                       |                     | converting costs into a common currency base and    |
| 37 |                       |                     | the exchange rate.                                  |
| 38 |                       |                     |                                                     |
| 39 |                       |                     |                                                     |
| 40 |                       |                     |                                                     |
| 41 |                       |                     |                                                     |
| 42 |                       |                     |                                                     |
| 43 |                       |                     |                                                     |
| 44 |                       |                     |                                                     |
| 45 |                       |                     |                                                     |
| 46 |                       |                     |                                                     |
| 47 | Choice of model       | <a href="#">#15</a> | Describe and give reasons for the specific type of  |
| 48 |                       |                     | decision analytical model used. Providing a figure  |
| 49 |                       |                     | to show model structure is strongly recommended.    |
| 50 |                       |                     |                                                     |
| 51 |                       |                     |                                                     |
| 52 |                       |                     |                                                     |
| 53 |                       |                     |                                                     |
| 54 | Assumptions           | <a href="#">#16</a> | Describe all structural or other assumptions        |
| 55 |                       |                     | underpinning the decision-analytical model.         |
| 56 |                       |                     |                                                     |
| 57 |                       |                     |                                                     |
| 58 |                       |                     |                                                     |
| 59 |                       |                     |                                                     |
| 60 |                       |                     |                                                     |

6-9

9

Supplementary

figure 1

9

|    |                    |                     |                                                      |    |
|----|--------------------|---------------------|------------------------------------------------------|----|
| 1  | Analytical methods | <a href="#">#17</a> | Describe all analytical methods supporting the       | 9  |
| 2  |                    |                     | evaluation. This could include methods for dealing   |    |
| 3  |                    |                     | with skewed, missing, or censored data;              |    |
| 4  |                    |                     | extrapolation methods; methods for pooling data;     |    |
| 5  |                    |                     | approaches to validate or make adjustments (such     |    |
| 6  |                    |                     | as half cycle corrections) to a model; and methods   |    |
| 7  |                    |                     | for handling population heterogeneity and            |    |
| 8  |                    |                     | uncertainty.                                         |    |
| 9  |                    |                     |                                                      |    |
| 10 |                    |                     |                                                      |    |
| 11 |                    |                     |                                                      |    |
| 12 |                    |                     |                                                      |    |
| 13 |                    |                     |                                                      |    |
| 14 |                    |                     |                                                      |    |
| 15 |                    |                     |                                                      |    |
| 16 |                    |                     |                                                      |    |
| 17 |                    |                     |                                                      |    |
| 18 |                    |                     |                                                      |    |
| 19 |                    |                     |                                                      |    |
| 20 | <b>Results</b>     |                     |                                                      |    |
| 21 |                    |                     |                                                      |    |
| 22 |                    |                     |                                                      |    |
| 23 | Study parameters   | <a href="#">#18</a> | Report the values, ranges, references, and, if used, | 11 |
| 24 |                    |                     | probability distributions for all parameters. Report |    |
| 25 |                    |                     | reasons or sources for distributions used to         |    |
| 26 |                    |                     | represent uncertainty where appropriate. Providing   |    |
| 27 |                    |                     | a table to show the input values is strongly         |    |
| 28 |                    |                     | recommended.                                         |    |
| 29 |                    |                     |                                                      |    |
| 30 |                    |                     |                                                      |    |
| 31 |                    |                     |                                                      |    |
| 32 |                    |                     |                                                      |    |
| 33 |                    |                     |                                                      |    |
| 34 |                    |                     |                                                      |    |
| 35 |                    |                     |                                                      |    |
| 36 |                    |                     |                                                      |    |
| 37 |                    |                     |                                                      |    |
| 38 | Incremental costs  | <a href="#">#19</a> | For each intervention, report mean values for the    | 11 |
| 39 |                    |                     | main categories of estimated costs and outcomes      |    |
| 40 | and outcomes       |                     | of interest, as well as mean differences between     |    |
| 41 |                    |                     | the comparator groups. If applicable, report         |    |
| 42 |                    |                     | incremental cost-effectiveness ratios.               |    |
| 43 |                    |                     |                                                      |    |
| 44 |                    |                     |                                                      |    |
| 45 |                    |                     |                                                      |    |
| 46 |                    |                     |                                                      |    |
| 47 |                    |                     |                                                      |    |
| 48 |                    |                     |                                                      |    |
| 49 |                    |                     |                                                      |    |
| 50 | Characterising     | <a href="#">#20</a> | Single study-based economic evaluation: Describe     | NA |
| 51 |                    |                     | the effects of sampling uncertainty for the          |    |
| 52 | uncertainty        | <a href="#">a</a>   | estimated incremental cost and incremental           |    |
| 53 |                    |                     | effectiveness parameters, together with the impact   |    |
| 54 |                    |                     |                                                      |    |
| 55 |                    |                     |                                                      |    |
| 56 |                    |                     |                                                      |    |
| 57 |                    |                     |                                                      |    |
| 58 |                    |                     |                                                      |    |
| 59 |                    |                     |                                                      |    |
| 60 |                    |                     |                                                      |    |

of methodological assumptions (such as discount rate, study perspective).

|    |                       |                     |                                                       |
|----|-----------------------|---------------------|-------------------------------------------------------|
| 1  |                       |                     |                                                       |
| 2  |                       |                     |                                                       |
| 3  |                       |                     |                                                       |
| 4  |                       |                     |                                                       |
| 5  |                       |                     |                                                       |
| 6  | Characterising        | <a href="#">#20</a> | Model-based economic evaluation: Describe the         |
| 7  |                       |                     |                                                       |
| 8  | uncertainty           | <a href="#">b</a>   | effects on the results of uncertainty for all input   |
| 9  |                       |                     |                                                       |
| 10 |                       |                     | parameters, and uncertainty related to the structure  |
| 11 |                       |                     |                                                       |
| 12 |                       |                     | of the model and assumptions.                         |
| 13 |                       |                     |                                                       |
| 14 |                       |                     |                                                       |
| 15 | Characterising        | <a href="#">#21</a> | If applicable, report differences in costs, outcomes, |
| 16 |                       |                     |                                                       |
| 17 | heterogeneity         |                     | or cost effectiveness that can be explained by        |
| 18 |                       |                     |                                                       |
| 19 |                       |                     | variations between subgroups of patients with         |
| 20 |                       |                     |                                                       |
| 21 |                       |                     | different baseline characteristics or other observed  |
| 22 |                       |                     |                                                       |
| 23 |                       |                     | variability in effects that are not reducible by more |
| 24 |                       |                     |                                                       |
| 25 |                       |                     | information.                                          |
| 26 |                       |                     |                                                       |
| 27 |                       |                     |                                                       |
| 28 |                       |                     |                                                       |
| 29 |                       |                     |                                                       |
| 30 | <b>Discussion</b>     |                     |                                                       |
| 31 |                       |                     |                                                       |
| 32 |                       |                     |                                                       |
| 33 | Study findings,       | <a href="#">#22</a> | Summarise key study findings and describe how         |
| 34 |                       |                     |                                                       |
| 35 | limitations,          |                     | they support the conclusions reached. Discuss         |
| 36 |                       |                     |                                                       |
| 37 | generalisability, and |                     | limitations and the generalisability of the findings  |
| 38 |                       |                     |                                                       |
| 39 | current knowledge     |                     | and how the findings fit with current knowledge.      |
| 40 |                       |                     |                                                       |
| 41 |                       |                     |                                                       |
| 42 |                       |                     |                                                       |
| 43 | <b>Other</b>          |                     |                                                       |
| 44 |                       |                     |                                                       |
| 45 |                       |                     |                                                       |
| 46 | Source of funding     | <a href="#">#23</a> | Describe how the study was funded and the role of     |
| 47 |                       |                     |                                                       |
| 48 |                       |                     | the funder in the identification, design, conduct,    |
| 49 |                       |                     |                                                       |
| 50 |                       |                     | and reporting of the analysis. Describe other non-    |
| 51 |                       |                     |                                                       |
| 52 |                       |                     | monetary sources of support                           |
| 53 |                       |                     |                                                       |
| 54 |                       |                     |                                                       |
| 55 |                       |                     |                                                       |
| 56 |                       |                     |                                                       |
| 57 |                       |                     |                                                       |
| 58 |                       |                     |                                                       |
| 59 |                       |                     |                                                       |
| 60 |                       |                     |                                                       |

1 Conflict of interest [#24](#) Describe any potential for conflict of interest of 23  
2  
3 study contributors in accordance with journal  
4 policy. In the absence of a journal policy, we  
5 recommend authors comply with International  
6 Committee of Medical Journal Editors  
7 recommendations  
8  
9  
10  
11  
12  
13  
14

15  
16 Notes:

- 17  
18  
19 • 15: Supplementary figure 1 The CHEERS checklist is distributed under the terms of the Creative  
20 Commons Attribution License CC-BY-NC. This checklist was completed on 20. August 2021  
21 using <https://www.goodreports.org/>, a tool made by the [EQUATOR Network](#) in collaboration with  
22 [Penelope.ai](#)  
23  
24  
25  
26  
27  
28  
29  
30  
31  
32  
33  
34  
35  
36  
37  
38  
39  
40  
41  
42  
43  
44  
45  
46  
47  
48  
49  
50  
51  
52  
53  
54  
55  
56  
57  
58  
59  
60



# BMJ Open

## Societal economic burden of hypertension at selected hospitals in southern Ethiopia; a patient-level analysis

|                                 |                                                                                                                                                                                                                                                                                                                                                                                                                                                                                                                                                                                                                                                                                                                                                                                                                                   |
|---------------------------------|-----------------------------------------------------------------------------------------------------------------------------------------------------------------------------------------------------------------------------------------------------------------------------------------------------------------------------------------------------------------------------------------------------------------------------------------------------------------------------------------------------------------------------------------------------------------------------------------------------------------------------------------------------------------------------------------------------------------------------------------------------------------------------------------------------------------------------------|
| Journal:                        | <i>BMJ Open</i>                                                                                                                                                                                                                                                                                                                                                                                                                                                                                                                                                                                                                                                                                                                                                                                                                   |
| Manuscript ID                   | bmjopen-2021-056627.R3                                                                                                                                                                                                                                                                                                                                                                                                                                                                                                                                                                                                                                                                                                                                                                                                            |
| Article Type:                   | Original research                                                                                                                                                                                                                                                                                                                                                                                                                                                                                                                                                                                                                                                                                                                                                                                                                 |
| Date Submitted by the Author:   | 03-Mar-2022                                                                                                                                                                                                                                                                                                                                                                                                                                                                                                                                                                                                                                                                                                                                                                                                                       |
| Complete List of Authors:       | Sorato, Mende; Arba Minch University, Department of Pharmacy; Tehran University of Medical Sciences, Faculty of Pharmacy, Department of Pharmacoeconomics and pharmaceutical Administration.<br>Davari, Majid; Tehran University of Medical Sciences, Faculty of Pharmacy, Department of Pharmacoeconomics and pharmaceutical Administration<br>Kebriaeezadeh, Abbas; Tehran University of Medical Sciences School of Pharmacy, Faculty of Pharmacy, Department of Pharmacoeconomics and pharmaceutical Administration<br>Sarrafzadegan, Nizal; Isfahan University of Medical Sciences, Isfahan Cardiovascular Research Center; University of British Columbia, School of Population and Public Health, Faculty of Medicine<br>Shibru, Tamiru; Arba Minch University, School of Medicine, College of Medicine and Health Sciences |
| <b>Primary Subject Heading</b>: | Health economics                                                                                                                                                                                                                                                                                                                                                                                                                                                                                                                                                                                                                                                                                                                                                                                                                  |
| Secondary Subject Heading:      | Cardiovascular medicine, Health services research, Public health, Health policy                                                                                                                                                                                                                                                                                                                                                                                                                                                                                                                                                                                                                                                                                                                                                   |
| Keywords:                       | Health economics < HEALTH SERVICES ADMINISTRATION & MANAGEMENT, HEALTH ECONOMICS, Cardiology < INTERNAL MEDICINE, Hypertension < CARDIOLOGY                                                                                                                                                                                                                                                                                                                                                                                                                                                                                                                                                                                                                                                                                       |
|                                 |                                                                                                                                                                                                                                                                                                                                                                                                                                                                                                                                                                                                                                                                                                                                                                                                                                   |

SCHOLARONE™  
Manuscripts



I, the Submitting Author has the right to grant and does grant on behalf of all authors of the Work (as defined in the below author licence), an exclusive licence and/or a non-exclusive licence for contributions from authors who are: i) UK Crown employees; ii) where BMJ has agreed a CC-BY licence shall apply, and/or iii) in accordance with the terms applicable for US Federal Government officers or employees acting as part of their official duties; on a worldwide, perpetual, irrevocable, royalty-free basis to BMJ Publishing Group Ltd ("BMJ") its licensees and where the relevant Journal is co-owned by BMJ to the co-owners of the Journal, to publish the Work in this journal and any other BMJ products and to exploit all rights, as set out in our [licence](#).

The Submitting Author accepts and understands that any supply made under these terms is made by BMJ to the Submitting Author unless you are acting as an employee on behalf of your employer or a postgraduate student of an affiliated institution which is paying any applicable article publishing charge ("APC") for Open Access articles. Where the Submitting Author wishes to make the Work available on an Open Access basis (and intends to pay the relevant APC), the terms of reuse of such Open Access shall be governed by a Creative Commons licence – details of these licences and which [Creative Commons](#) licence will apply to this Work are set out in our licence referred to above.

Other than as permitted in any relevant BMJ Author's Self Archiving Policies, I confirm this Work has not been accepted for publication elsewhere, is not being considered for publication elsewhere and does not duplicate material already published. I confirm all authors consent to publication of this Work and authorise the granting of this licence.

# Societal economic burden of hypertension at selected hospitals in southern Ethiopia; a patient-level analysis

## Authors:

### 1. Mende Mensa Sorato\* (B.Pharm, MSc. PhD Candidate)

**Address:** Department of Pharmacy, Arba Minch University and Faculty of Pharmacy, Department of Pharmacoeconomics and pharmaceutical Administration.

Tehran University of Medical Sciences

Gmail: [mendemensa@gmail.com](mailto:mendemensa@gmail.com)

**ORCID:** [0000-0002-6342-0980](https://orcid.org/0000-0002-6342-0980)

Mobile: +98-9056309138

P.O. Box: 21

**Mailing Address:** Arba Minch Ethiopia

### 2. Dr. Majid Davari (PharmD, PhD in Health/Pharmacoeconomics)

Email: [M-davari@tums.ac.ir](mailto:M-davari@tums.ac.ir)

Mobile: [+98-9134128963](tel:+98-9134128963)

Address: Tehran University of Medical Sciences, Faculty of Pharmacy, Department of Pharmacoeconomics and pharmaceutical Administration

### 3. Dr. Abbas Kebriaeezadeh (PharmD, PhD in Pharmacology)

Email: [kebriace@tums.ac.ir](mailto:kebriace@tums.ac.ir)

Mobile: [+98-9122052460](tel:+98-9122052460)

**Address:** Tehran University of Medical Sciences, Faculty of Pharmacy, Department of Pharmacoeconomics and pharmaceutical Administration.

### 4. Dr. Nizal Sarrafzadegan ( MTMD MPH, MD)

Email: [nsarrafzadegan@gmail.com](mailto:nsarrafzadegan@gmail.com)

**Address:** Director of Isfahan Cardiovascular Research Center, WHO Collaborating Center in EMR, Isfahan University of Medical Sciences

### 5. Dr. Tamiru Shibru (Internist)

Tel (cell): +251-911-70-47-67

Email: [drtamshib1@gmail.com](mailto:drtamshib1@gmail.com)

**Address:** Arba Minch University, *College of medicine and health sciences*

\* Corresponding Author

**Word Count:** 5723

**Number of references:** 74

**Abstract Count:** 300

**Key Words:** Hypertension; Economic burden of Hypertension; Cost of Illness study; Southern Ethiopia

## I. Abstract

**Objectives:** There is inadequate information on the economic burden of hypertension treatment in Ethiopia. Therefore, this study was conducted to determine the societal economic burden of hypertension at Selected Hospitals in Southern Ethiopia.

**Methods:** Prevalence-based cost of illness (COI) study from a societal perspective was conducted. Disability-adjusted life years (DALYs) were determined by the current world health organization's recommended DALY valuation method. Adjustment for comorbidity and a 3% discount was done for DALYs. The data entry, processing, and analysis were done by using SPSS version 21.0 and Microsoft Excel 2013.

**Results:** We followed a cohort of 406 adult hypertensive patients retrospectively for 10 years from September 2010 to 2020. Two hundred-fifty (61.6%) of patients were females with a mean age of  $55.87 \pm 11.03$  years. Less than 1 in five 75 (18.5%) of patients achieved their blood pressure control target. A total of 64,837.48 United States Dollar (\$US) direct cost was incurred due to hypertension. A total of 11,585 years and 579.57 years were lost due to hypertension-related premature mortality and morbidity respectively. Treated and uncontrolled hypertension accounted for 50.83% (6027) of total years lost due to premature mortality from treated hypertension cohort. Total productivity loss due to premature mortality and morbidity was \$US 449,394.69. The overall economic burden of hypertension was \$US 514,232.16 (\$ US 105.55 per person per month)

**Conclusion:** Societal economic burden of hypertension in Southern Ethiopia was substantial. Indirect costs accounted for more than eight out of 10 dollars. Treated and uncontrolled hypertension took the lion's share of economic cost and productivity loss due to premature mortality and morbidity. Therefore, designing and implanting strategies for the prevention of hypertension, early screening, and detection, and improving the rate of blood pressure control by involving all relevant stakeholders at all levels is critical to saving scarce health resources.

### Strengths and limitations of this study

- Using the cardiovascular disease policy model adapted to Sub-Saharan African perspective,
- Including productivity loss costs associated with hypertension (premature mortality and morbidity) and
- Obtaining all simulation variables and transition probability data from valid sources (systematic reviews, randomized controlled trials, and prospective cohort studies) were the strengths of this study
- Uncertainty in age and sex-specific prevalence of undiagnosed hypertension and variability in employment rate which require due consideration during applying the findings of this study were limitations.

## 1. Introduction

Hypertension doubles the risk of death from stroke, heart disease, vascular diseases, diabetes, atherosclerosis, and kidney disease (1). According to the national STEPS survey, only 28.4% of hypertensive patients were taking antihypertensive medication prescribed by professionals in Ethiopia (2). According to the International Society of hypertension global hypertension practice guideline 2020, hypertension remains the leading cause of death globally, accounting for 10.4 million deaths per year (3).

Hypertension is associated with societal and economic consequences particularly in Low and middle-income countries (LMICs). In addition to the direct costs associated with health care utilization for the management of complications, hypertension causes significant productivity loss from disability and premature death (4, 5). WHO report from South East Asian region also indicated huge impact of hypertension in national finances due to premature death, disability, personal and family disruption, loss of income, and healthcare expenditure (6). According to a WHO report in 2017, stroke, coronary heart disease, and hypertension caused 39,571, 46,943, and 11,050 deaths respectively (i.e. 30 patients per day die due hypertension) in Ethiopia (7).

Cost of illness (COI) study is used to measure the economic burden of disease to individuals, communities, and society as a whole. It can provide information to support the political process and healthcare decision-making if it is conducted from a societal perspective by using an appropriate approach and bottom-up costing strategy (8-10) (11, 12). Despite this huge impact on national economies, the economic burden of hypertension is not studied in Ethiopia particularly Southern Ethiopia. To fill this evidence gap, this study was conducted to determine the economic burden of hypertension at selected public hospitals in Southern Ethiopia by using the prevalence-based cost-of-illness method from a societal perspective to estimate the direct and indirect costs of hypertension in a given year (2021) in Southern Ethiopia.

## 2. Methods and Materials

### 2.1. Study design, Area and Period

A prevalence-based retrospective cost of illness study from societal perspective focusing on quantifying direct and indirect costs was conducted from September 2010- September 2020 in at three selected public hospitals Southern Ethiopia. The bottom-up approach was used to estimate the economic burden of hypertension in Southern Ethiopia (figure 1). The human capital approach was used to calculate indirect costs separately in males and females and also among different age groups. A prevalence-based COI model was constructed in which hypertensive patients were simulated from diagnosis through active treatment, palliative care, and death over 15-64 years. Age and sex-specific mortality rates, measures of productivity, and workforce statistics were used to simulate the progression of these cohorts until death or age 64 years. First, the model estimated cumulative years of life and DALYs lived for the working-age population who had hypertension. Then the

1  
2  
3 model re-simulated with the hypothetical assumption that they did not have hypertension, with relevant changes  
4 to mortality rates and productivity. We estimated the probability of death separately for (1) all-cause mortality  
5 in absence of hypertension and related complications and (2) mortality attributable to the included disease  
6 states. The first component was estimated using WHO Life Tables, and the second component was calculated  
7 based on standardized mortality ratios extracted from the literature. The natural history study conducted in  
8 1974 showed that the mortality rate was 1.85 (3.01 in males and 1.62 in females) (13). Interventional trials  
9 suggested that it could be possible to achieve effective BP targets in about 70% of patients by improving  
10 adherence and/or intensifying therapy (14).  
11  
12  
13  
14  
15

## 16 17 **2.2. Study populations**

18  
19 The study populations were selected adult hypertensive patients at three selected public hospitals. According  
20 to the world population prospect 2020 estimate (15). In the same year, the population of the Gamo zone  
21 accounted for 1.5% of the total population, Gofa, and South Omo Zone 1.5% of the total population. The  
22 target population is 3.0% total population of Ethiopia or 20% of the Southern Ethiopian population  
23 (6,208,034). Based on age distribution: 0-14 years are children, 15-24 years are early working age, 25-54 years  
24 are prime working age, 55-64 years are mature working age and  $\geq 65$  years are elderly (13).  
25  
26  
27  
28

## 29 30 **2.3. Inclusion and exclusion criteria**

31  
32 We included all adult hypertensive patients having at least five years of follow-up visits before data collection  
33 and receiving care during the study period from selected facilities. However, patients who are unwilling to  
34 participate in this study, patients who have less than five years of follow-up, and incomplete patient records  
35 (don't contain follow-up BP records and refill medications, laboratory requests, and results) were excluded.  
36  
37  
38

## 39 40 **2.4. Study Variables**

### 41 42 **Dependent Variables**

- 43 • Economic burden of hypertension

### 44 45 **Independent variables**

- 46 • Patient-related (socio-demographic characteristics, heart disease knowledge, healthy lifestyle and heart  
47 disease risk perception, presence of comorbidity, type of medications, treatment adherence, shared decision  
48 making, health-related quality Life)

### 49 50 **Cost related variables**

- 51 ○ **Medical costs** (inpatient hospital stay/hospitalization cost, outpatient clinic visit, drug acquisition costs,  
52 drug administration cost, laboratory test, and imaging study costs)  
53  
54  
55  
56  
57

- **Non-medical costs** (transportation, meal, patient time cost due to treatment, cost due informal care by family or friends)
- **Indirect costs** (absenteeism, presenteeism, unemployment, early retirement, disability, premature death)

## 2.5. Sample Size and Sampling Technique

### 2.5.1. Sample size determination

The sample size was determined by using the single population proportion formula by taking prevalence of patients controlled their BP as 14% from WHO 2016 BP control rate report (16-18) and Z value of 1.96 at 95% confidence interval. We added 10% for non-response rate and two for design effect due to multi-stage sampling technique involvement. Finally, a formula giving a larger sample size was used. Total 407 hypertensive adult patients who are on follow-up care will be included.

$$n = \frac{(Z\alpha/2)^2 P (1-P)}{d^2} = 185$$

Where: n = is the sample size

- $Z^2$ = standard normal deviation, set at 1.96, correspond to the 95% confidence interval
- $d$  = is the desired level of precision/margin of error (0.05)
- $p$ = prevalence of patients taking anti-hypertensive ( $p=28.4\%$ ), and  $q$  is  $1-p$ .

$$= 185 + (185 * 10\%) = 203.5$$

$$= 203.5 * 2 = 407$$

### 2.5.2. Sampling Techniques

A multi-stage simple random sampling technique was used. We randomly selected three zones from a total of 12 zones found in the Southern region. Three general public hospitals with experience of providing CVD care for at least five years from selected four zones were included in this study. The total sample size was allocated to these hospitals based on an estimated number of adult hypertensive patients attending respective hospitals (i.e., we included 212 patients from Arba Minch General Hospital, 107 patients from Jinka General Hospital, and 88 patients from Sawula General Hospital). Finally, a consecutive sampling technique was applied in each facility until the desired sample size was achieved.

## 2.6. Data collection tools and Procedures

### 2.6.1. Model input parameters

Key model input variables include; 2020 population of selected zones, hypertension prevalence by treatment and control status, Transition probabilities to death and healthy state, cost of diagnosis, and management. Among those with treated hypertension, treated and controlled hypertension was defined based on BP control target of ISH 2020 guideline (3). We used national STPES survey data to estimate the prevalence of cardiovascular risk factors (MI, angina, heart failure, stroke, TIA). Incorporating the risk factor prevalence data in the relevant Framingham risk equation, the age and sex-specific probability of CHD and cerebrovascular disease (i.e., stroke and transient ischemic attack) events were estimated. The probability of each health state



1  
2  
3 was calculated using the age- and sex-specific CHD and cerebrovascular disease event distributions (2, 19). To  
4 estimate the corresponding probabilities, separate relative risk estimates were used for CHD events (Stable  
5 Angina, Unstable Angina, and MI) and cerebrovascular diseases (Stroke and Transient Ischemic Attack),  
6 assuming that antihypertensive treatment affects the probability of every disease state similarly across all age  
7 and sex groups. Relative risk reductions attributable to antihypertensive treatment were extracted from the  
8 peer-reviewed literature (20-22).  
9  
10  
11

12  
13 The 2020 world population prospect estimate was used for the baseline population and number of 33-year-olds  
14 projected to enter the model population from 2020-2070 (15). The annual probability of coronary heart disease  
15 and stroke was based on national STEPS survey (2), and Framingham Heart Study (23) and the Framingham  
16 Offspring Study (24), by contextualizing to Ethiopian scenario. Incident coronary heart disease events were  
17 allocated to angina pectoris, myocardial infarction, or cardiac arrest. Prevalence, joint distributions, and means  
18 of Ethiopia risk factor values were estimated from the national STEPS survey (2). Annual transition rates  
19 between risk factor levels were calculated to preserve age-range trends over time. Betas for risk function for  
20 non-blood pressure risk factors were estimated separately for the risk of incident coronary heart disease events,  
21 incident strokes, and non-CVD deaths, using examinations 1-8 of the Framingham Offspring cohort (24). Risk  
22 factors are assumed to affect the incidence of MI, arrest, and angina in proportion to the overall incidence of  
23 coronary heart disease, except tobacco smokers are assumed to have a higher relative risk for infarction and  
24 arrest (25); and a proportionately lower coefficient for angina. Environmental tobacco exposure is assumed to  
25 carry a relative risk of 1.26 for MI and cardiac arrest compared with non-exposed non-smokers (26) but not to  
26 influence angina. The number of hospitalized MI were obtained from the national STEPS survey (2). Case-  
27 fatality rates and rates of MI in subgroups were estimated from national data and other complementary sources.  
28 Prehospital arrest deaths and out-of-hospital cardiac arrests surviving to hospital discharge were estimated from  
29 our effectiveness study (Supplementary Table 1).  
30  
31  
32  
33  
34  
35  
36  
37  
38  
39

40 Survival after a coronary heart disease event was estimated and calibrated based on national or international data  
41 sources (27, 28). Rates of coronary revascularizations was estimated from the National hospital discharge survey,  
42 with mortalities estimated from aggregated historical data. Stroke incidence was assumed to be independent of the  
43 risk of new-onset coronary heart disease in the same year. The number of hospitalized strokes cases was obtained  
44 from national and regional studies. The annual probabilities of stroke after MI (29, 30) and the probability of  
45 coronary heart disease in stroke patients were based on natural history studies and systematic reviews of blood  
46 pressure control trials (31-36). A 30-day heart failure mortality and re-hospitalization data were from the  
47 THESEUS-HF registry (37) and Korean Acute Heart Failure Registry (KorAHF)(38, 39) (Supplementary Table 2  
48 and 3).  
49  
50  
51  
52  
53  
54  
55  
56  
57  
58  
59  
60

1  
2  
3 The background prevalence of CVD by age, sex, and CVD disease state (stroke, coronary heart disease, or both  
4 stroke and coronary heart disease) in 2020 was estimated from the National Health Survey data (2) and GBD 2017  
5 (40). The background prevalence of prior coronary revascularization was estimated from revascularizations before  
6 2019 and estimated survival after revascularization, while model projections were used to infer the distribution of  
7 revascularization by CVD state. Age and sex-specific health care costs were estimated using national data, and our  
8 effectiveness data. Hospitalized stroke and coronary heart disease costs and acute stroke rehabilitation costs were  
9 estimated using WHO Choice (41) inflated to 2021. Outpatient consultations, and inpatient stay and bed days were  
10 also estimated from WHO choice (41) inflated to 2021. Chronic outpatient CVD costs additional to average  
11 background health care costs for the first year after the event and subsequent years were estimated for patients with  
12 a stroke or coronary heart disease diagnosis was pooled from the 2015 national STEPS survey. Average annual non-  
13 cardiovascular costs were estimated from the national STEPS survey (2), and EDHS 2016 survey (13).

### 21 **2.6.2. Cost estimation**

22 The outcomes measures are total discounted societal costs, cost/year, and cost/patient-year. This is the amount of  
23 health budget that could be saved by effective prevention and control of hypertension. The direct costs were divided  
24 into two subcategories: direct medical costs and direct non-medical costs. Direct medical costs include; inpatient  
25 stays, outpatient clinic visits, medical services, drug acquisition, dispensing, administration, monitoring, laboratory  
26 test, and imaging study costs. The costs associated with outpatient/inpatient visits were estimated by multiplying  
27 the numbers of outpatient visits related to hypertension by the outpatient costs per year (i.e., twelve times WHO  
28 cost per outpatient visit for secondary hospitals inflated to 2021) (41).

29  
30  
31  
32  
33  
34 Data concerning medications prescribed for the management of hypertension, and associated comorbidities, and  
35 laboratory tests and imaging studies were done were collected by patient chart abstraction in index year (2020). The  
36 cost of medications used for management of hypertension and associated comorbidities was taken from Ethiopian  
37 Pharmaceutical supply agency Arba Minch regional hub selling price and retail price of Arba Minch General  
38 Hospital in 2020. The retail price of Arba Minch General Hospital was used because of the minimum distance from  
39 the Pharmaceutical supply agency hub, which could minimize markup added on retail price due to transportation  
40 cost. Costs of laboratory procedures were also taken from Arba Minch Hospital Laboratory's service price list. The  
41 prices of relevant laboratory tests and imaging studies were based on the average price of included Hospitals. The  
42 salary scale of the health workforce was based on the FMOH of Ethiopia (Supplementary Table 4).

43  
44  
45  
46  
47  
48 Ongoing program costs for hypertension care was estimated from WHO tool outputs for CVD and diabetes care  
49 and National strategic action plan (NSAP) for prevention & control of non-communicable diseases in Ethiopia  
50 2014-2016 and adjusted for 2021 inflation target population (42). Adjustment for the study population was done by  
51 multiplying the national cost by the proportion of the study population (i.e., 3%). National and regional cost  
52 estimates were based on the proportion of patients studied (i.e. 3% and 20%). We considered this strategy since the  
53  
54  
55  
56  
57  
58

1  
2  
3 age and sex distribution of hypertension among different regions in the country is did not vary significantly. The  
4 collected cost data added up and averaged by using a bottom-up approach (Figure 1). Facility-based or reference  
5 costs were used during computing costs. The total medical cost of hypertension treatment was calculated as the  
6 sum of the product of medical costs with their respective unit prices. Costs were discounted at an annual rate of  
7 3% and reported in 2021 USD (43, 44).

8  
9  
10  
11 Direct non-medical costs include transportation costs and patient time costs due to care. The cost of patient time  
12 due to care was estimated by using the average daily wage of patients (97.00 ETB) which was calculated from 2912  
13  $\pm$  2732.24 average monthly income. Transportation cost was determined by using the cost of average traveling  
14 distance and local transportation tariff (42.00 ETB) in January 2021. According to EDHS 2016 survey showed that  
15 33% of women and 88% of men are currently employed (13). This proportion was used to determine the patient  
16 time cost due to care for employed groups. For the unemployed proportion, the average daily wage of daily laborers  
17 workers working 8 hours per day for 6 days per week was used (26.53 ETB) from the monthly wage of 796.00 ETB  
18 (420-1172 ETB) (45).

19  
20  
21 Indirect costs include cost hospitalization, productivity loss due to illness, and cost of death. Cost-of hypertension-  
22 related hospitalization was taken from WHO Choice (41), costs per inpatient stay and cost per inpatient bed day  
23 times duration of hospitalization inflated for 2021, and professional time (physician, nurse laboratory professional,  
24 and pharmacist time). If a patient had multiple admissions during the year, the costs for each admission were  
25 aggregated as the total costs (46).

### 26 27 28 **2.6.3. Mortality and morbidity estimations**

29  
30  
31 Age and sex-specific mortality rates among the adult general population in Ethiopia were taken from EDHS 2016  
32 survey and extrapolated to selected populations (13). According to EDHS 2016, the probability of dying before age  
33 50 years among adults  $\geq$  15 years were 10% and 12%, in women and men respectively (13). Due to the absence of  
34 mortality data specific to hypertension treatment and control status in Ethiopia, mortality risk in the general  
35 population was attributed to those with and without hypertension using sex-specific estimates of the relative risk  
36 (RR) of all-cause mortality associated with hypertension by treatment and control status was derived from a study  
37 conducted in India was used (47). A cohort study conducted in India among adults 20 years and above to determine  
38 the Rate and Risk of all-cause mortality among people with HTN showed that the incidence of deaths in the study  
39 was 4.28% during the follow-up period of 6 years. The relative risk of mortality was 3.13 (CI: 2.91-3.37) and 1.2 in  
40 the high BP group and at age of 60 years. The age-adjusted hazard ratio of all-cause mortality for the high BP group  
41 was 2.96 (2.56-3.42) (47) (Supplementary Tables 5 and 6).

42  
43  
44 In 2020 crude death rate of the Ethiopian population-based on global estimates was 6.29 deaths per 1000  
45 population (48). The estimated prevalence of hypertension among adults was calculated from National STEPS  
46 Survey 2016, systematic review and meta-analysis, and WHO report and local studies and the mean estimated  
47  
48  
49  
50  
51

prevalence of hypertension was 21.39% (2, 13, 47, 49-52). Only 28.4% of patients with hypertension are taking antihypertensive medication (2). The mean relative risk of all-cause mortality among hypertensive population when compared to those without hypertension was 1.39 (0.95 to 1.95) (53) (Supplementary Table 3).

Years of life lost due to hypertension morbidity was determined by first calculating disability weights for specific ages based on blood pressure control status (X). Then subtract this value (X) from the life expectancy of the Ethiopian population (i.e., 66.7 years for men, and 70.4 years for women) (Y). The productivity loss cost due to hypertension morbidity was calculated by multiplying Y with sex-specific employment rate based on a monthly average income of 2059.078 ETB from the National STEPS survey 2015 adjusted for 2021 inflation (13,13/9.57=1.372) STEPS Survey, 2015 (2). The EDHS 2016 survey showed that 33% of women and 88% of men are currently employed (13) and for unemployed, 2019 minimum average monthly earnings (ETB) of daily laborers reported by the MOLSA 796 ETB (420-1172 ETB) (45). Concerning, cost of productivity lost due to premature mortality: first we calculated potential years of life lost (YLL) by subtracting life expectancy from sex-specific age of death at which the death is recorded (Z). Then Z is multiplied by the number of deaths in each age group (Xi). Finally, we multiplied Xi with sex-specific employment rates like productivity loss due to hypertension-related morbidity above (54). Excess mortality and morbidity due to hypertension to hypertension were determined by subtracting age and sex-specific morbidity and mortality among the general population from the hypertensive cohort. Both were determined by using age, sex, and blood pressure treatment status mortality rate per 1000 person-years (Supplementary Table 6).

#### 2.6.4 Morbidity adjustment

Patients with hypertension may have more than one disease, the addition of YLDs across causes may result in overestimation of the total loss of health (55). Therefore, it is recommended to estimate comorbidities using the assumption of independence within age-sex groups (56):

$$P_{1+2} = P_1 + P_2 - (P_1 \times P_2) = 1 - (1 - P_1) \times (1 - P_2)$$

- Where  $P_{1+2}$  is the prevalence of the two comorbid diseases 1 and 2,
- $P_1$  is the prevalence of disease 1 and  $P_2$  is the prevalence of disease 2.

The combined disability weight for individuals with multiple conditions is estimated assuming a multiplicative model as follows:

$$DW_{1+2} = 1 - (1 - DW_1) \times (1 - DW_2)$$

Since prevalence YLDs are calculated for each cause as:

$$YLD_i = DW_i \times P_i$$

- two preceding equations can be combined into a single calculation resulting in:

$$YLD_{1+2} = 1 - (1 - YLD_1) \times (1 - YLD_2)$$

### 2.6.5 Assumptions and Transition probabilities

The counterfactual comparator (hypothetical cohort of normotensive individuals) with a probability of developing CVD events among the general population. Both in case and comparator cohorts, the probability of non-CV death does not depend on the health state and is similar for both hypertensive and normotensive populations (57) and we chose not to model differential use of antihypertensive medication classes in order not to bias cost-of-treatment. Antihypertensive dose intensification and frequency of BP monitoring were based on ISH 2020 guidelines for blood pressure control. We did not simulate the effects of any particular medication; instead, we simulated “standard dose” effects and assumed average drug prices across classes (58). The amount of blood pressure change was assumed to be a function of the baseline BP and the effect of a standard-dose antihypertensive agent at that pre-treatment level (59). We also assumed the medication adherence rate as 75% based on clinical trials (59). Other important assumptions include cost of illness due to hypertension or associated morbidities were calculated based on the monthly earnings during data collection; all costs incurred before one year were adjusted/accounted to today’s value (2021 USD equivalent) and discounted at 3%; years of life lost and years of life lived with disability (YLDs) were not discounted as per the recent WHO recommendations.

## 2.7. Data Quality control, Processing, and Analysis

Questionnaires are prepared in English and the patient interview part of the questionnaire was translated into Amharic and translated back into English to check its consistency. The Amharic version of the patient interview questionnaire and English version of the health professional interview, data abstraction form, and health system interview questionnaires was used for data collection. The questionnaire was pretested on 30 adult hypertensive patients in Arba Minch General Hospital to ensure that the respondents could understand the questions and to check for consistency and possible amendments were made based on findings. Six professional nurses (BSc.) for data collection and one senior professional working in the respective health facilities for supervision were oriented before data collection about data collection approaches and contents of data collection format for one day by the principal investigator. Continuous follow-up and supervision were made by the principal investigator throughout the data collection period. The collected data were checked for completeness and consistency by the principal investigator on daily basis at the spot during the data collection time. Then data were transcribed back to English for the patient interview part and entry was made using Epi-data 3.1 software. After data processing, analysis was done by using SPSS version 21.0 and Microsoft excel 2010. A summary of descriptive statistics was reported for socio-demographic factors; cost of hypertension and life years lost due to hypertension related morbidity and premature mortality and presented in tables and figures.

## 2.8. Patient and Public involvement

1  
2  
3 There was no identifiable patient involvement in this research. Patients' demographic characteristics and disease  
4 related variables were obtained by using questionnaire based interview after obtaining verbal consent from the  
5 patient. No patient identifier information was collected. Finally, most of variables were taken from published  
6 national and international literatures, and all relevant sources were acknowledged through citation.  
7  
8  
9

## 10 **2.8. Statements**

### 11 **Ethics approval and consent to participate**

12  
13 The study was approved by Tehran University of medical sciences, Faculty of pharmacy, department of  
14 pharmacoconomics, and pharmaceutical administration ethical review board with Approval ID:  
15 *IR.TUMS.MEDICINE.REC.1399.674* and Arba Minch University College of medicine and health sciences  
16 Institutional review board with Reference number: *IRB/T10/2012*. After clarifying the study objective and  
17 confidentiality of the information; verbal informed consent was obtained from each respective hospital before  
18 data collection.  
19  
20  
21  
22  
23  
24

### 25 **Consent for publication**

26  
27 All authors read the full version of this manuscript and agreed to publish  
28  
29

### 30 **Availability of data and materials**

31  
32 All the data reported in the manuscript are publicly available up on official request of principal investigator  
33 upon acceptance of the manuscript  
34  
35

### 36 **Competing interests**

37  
38 The authors declare that they have no competing interests.  
39  
40

### 41 **Funding**

42  
43 There is no funding source for the study.  
44  
45

### 46 **Authors' contributions**

47 All Authors read and approved the manuscript. *MM* conceived the research, framed the format design and  
48 developed the manuscript for publication; *MD* participated in data analysis and reviewed the manuscript and *AK*  
49 reviewed the manuscript and write-up process; *NS* and *TS* participated in literature review and polished the  
50 language of the manuscript.  
51  
52  
53  
54  
55  
56  
57  
58  
59  
60



### 3. Results

#### 3.1. Description of study participants

In this study, we estimated the regional and national economic burden of hypertension (direct and indirect costs) by using the cardiovascular disease policy model adapted to the Sub-Saharan Africa perspective (60) (Supplementary Figure 1). Total costs of treated hypertension and hypertension-related excess mortality and years of life lost due to hypertension were determined. We followed a cohort of 406 hypertensive patients retrospectively for 10 years from September 2003 to 2013 Ethiopian calendar (September 2010-2020) for baseline assessment and simulated the cost of hypertension for lifelong from a societal perspective. About two-thirds, 250 (61.6%) of patients were females with a mean age of  $55.87 \pm 11.03$  years. Less than 1 in five 75 (18.5%) of patients achieved their BP control target based on international society of hypertension 2020 guidelines (Table 1).

**Table 1:** Patient characteristics and Disease related factors among adult hypertensive patients on regular follow-up at selected public hospitals in Southern Ethiopia, January 2021 (n=406)

| Sociodemographic factors                 |                                 | Frequency   |
|------------------------------------------|---------------------------------|-------------|
| Sex                                      | Male                            | 156 (38.4%) |
|                                          | Female                          | 250 (61.6%) |
| Age in in years                          | Below 40 years                  | 15 (3.7%)   |
|                                          | 40- 65 years                    | 286 (70.4%) |
|                                          | 65 years and above              | 105 (25.9%) |
| Religion                                 | Orthodox                        | 215 (53.0%) |
|                                          | Muslim                          | 37 (9.1%)   |
|                                          | Protestant                      | 144 (35.5%) |
|                                          | Catholic                        | 10 (2.5%)   |
| Annual gross income before tax (n=406)   | Less than 12,000                | 117 (28.8%) |
|                                          | 12,000- 18,000                  | 89 (21.9%)  |
|                                          | 18,000- 23,000                  | 200 (49.2%) |
| Level of Education                       | Illiterate                      | 259 (63.8%) |
|                                          | Grades 1-8                      | 46 (11.3%)  |
|                                          | Grades 9-12                     | 22 (5.4%)   |
|                                          | College and above               | 73 (18.0%)  |
|                                          | Post-graduate degree            | 6 (1.5%)    |
| Occupation                               | Employed                        | 65 (16.0%)  |
|                                          | Merchant                        | 63 (15.5%)  |
|                                          | Farmer                          | 79 (19.5%)  |
|                                          | House wife                      | 149 (36.7%) |
| <b>Disease related factors</b>           |                                 |             |
| Duration of hypertension since diagnosis | 5 - 9 years                     | 262 (64.5%) |
|                                          | 10 - 14 years                   | 131 (32.3%) |
|                                          | 15 and above years              | 13 (3.2%)   |
| Family history of CVDs                   | 1 <sup>st</sup> degree relative | 133 (32.7%) |
|                                          | Second degree relative          | 16 (3.9%)   |
|                                          | None                            | 257 (63.3%) |
| Presence of comorbidities (n=406)        | Yes                             | 310 (76.4%) |
|                                          | No                              | 96 (23.6%)  |
| History of hospitalization               | Yes                             | 250 (61.6%) |



|                                                |                                 |             |
|------------------------------------------------|---------------------------------|-------------|
|                                                | No                              | 156 (38.4%) |
| Duration of hospitalization (n=250)            | Below 5 days                    | 56 (22.4%)  |
|                                                | 5 to 10 days                    | 112 (44.8%) |
|                                                | More than 10 days               | 82 (32.8%)  |
| Target BP achieved based on ISH 2020 guideline | Yes                             | 75 (18.5%)  |
|                                                | No                              | 331 (81.5%) |
| Antihypertensive regimen                       | Monotherapy                     | 136 (33.5%) |
|                                                | Two drug combination            | 234 (57.6%) |
|                                                | Three and more drug combination | 36 (8.8%)   |

### 3.2. Cost of hypertension

#### 3.2.1 Direct (medical and non-medical) costs

Direct medical costs include program costs, cost of drugs for hypertension and comorbidities, laboratory costs, hospitalization costs, annual outpatient visit costs, and costs of medical supplies. A total of \$US 64,837.48 direct cost was incurred due to hypertension. Out of this, 80.0% (\$US 51,915.40) was direct medical cost. From direct medical costs, annual outpatient visit cost 33.55% (\$US 17,419.73), cost of comorbidity 26.21% (\$13,612.15 USD), and laboratory test costs 8.17% (\$US 4,263.29) took the largest share. While, total direct non-medical costs of hypertension was \$US 9,866.58 (i.e. transportation costs and patient time costs due to care). The regional and national annual estimated direct cost of hypertension were \$US 324,187.40 and \$US 2,161,249.33 respectively (Table 2).

**Table 2:** Direct annual costs of treating hypertension among adults in Southern Ethiopia, January 2021 (n=406)

| Cost category                                                | Annual total in ETB<br>Total (mean $\pm$ Standard deviation) | Annual cost<br>in July 2021<br>USD | Percentage<br>from total<br>direct cost |
|--------------------------------------------------------------|--------------------------------------------------------------|------------------------------------|-----------------------------------------|
| <b>Direct medical total</b>                                  | <b>2,258,319.97</b>                                          | 51,915.40                          | 80.0%                                   |
| Program costs                                                | 403,275.70 (993.0 $\pm$ 0.00)                                | 9,173.40                           |                                         |
| Cost of antihypertensives                                    | 119,847.64 (295.19 $\pm$ 107.78)                             | 2,726.20                           |                                         |
| Cost of drugs for comorbidity                                | 598,409.00 (2266.7 $\pm$ 1114.52)                            | 13,612.15                          |                                         |
| Cost for hospitalization                                     | 179,377.03 (3360.76 $\pm$ 1594.69)                           | 4,080.33                           |                                         |
| Laboratory tests                                             | 187,420.00 (461.63 $\pm$ 226.98)                             | 4,263.29                           |                                         |
| Annual outpatient visit costs                                | 765,795.60 (1886.20 $\pm$ 0.00)                              | 17,419.73                          |                                         |
| Cost of medical supplies                                     | 4,195.00 (85.60 $\pm$ 0.00)                                  | 95.42                              |                                         |
| <b>Professional time total</b>                               | <b>128,362.01</b>                                            | 2,950.85                           | 4.6%                                    |
| Physician time                                               | 92,032.08 (226.68 $\pm$ 0.00)                                | 2,093.47                           |                                         |
| Nurse time                                                   | 2,060.28 (43.84 $\pm$ 17.81)                                 | 46.87                              |                                         |
| Pharmacy time                                                | 4,453.01 (10.97 $\pm$ 0.00)                                  | 101.29                             |                                         |
| Laboratory time                                              | 29,816.64 (73.44 $\pm$ 0.00)                                 | 678.25                             |                                         |
| <b>Direct non-medical costs</b>                              | <b>433,748.59</b> (1068.84 $\pm$ 384.78)                     | 9,866.58                           | <b>15.37%</b>                           |
| Total direct cost of treated hypertension                    | 2,820,430.57                                                 | 64,837.48                          | 100.00%                                 |
| 1USD= 43.9614 ETB on July 13, 2021                           |                                                              |                                    |                                         |
| <b>ETB:</b> Ethiopian Birr; <b>USD:</b> United States Dollar |                                                              |                                    |                                         |

### 3.2.2. Life years lost due to premature mortality and morbidity

We determined the years of life lost due to premature mortality (excess mortality) and years of life lost due to hypertension morbidity for the productive age population (30-64 years) among a cohort of simulated adult hypertensive patients. Excess mortalities are all-cause deaths observed in those with hypertension compared to the same cohort assuming no hypertension. The excess mortality and years of life lost were different among the hypertensive cohort and simulated population with no hypertension. A total of 11,858 (6,159, men; 5,699 women) life years were lost due to hypertension-related premature mortality among 30-64 years old adults with hypertension. This equates \$US 428,969.78 (\$US 270,076.91, men; \$US 158,892.78). The estimated regional and national life years lost due to premature mortality was 59,290 and 395,267 respectively. This is equivalent to \$US 2,144,848.58 and \$US 14,298,990.51 respectively. From 15,232 years lost due to premature mortality in the hypertension cohort, treated and uncontrolled hypertension accounted for more than 6,824 (44.8%) total years lost due to premature mortality followed by treated controlled hypertension 5,832 (38.29%) and untreated hypertension 2,575 (16.9%) (Table 3 and 4).

**Table 3:** Excess deaths among adult hypertensive by treatment and control status over the working lifetime simulated from life table modelling in Southern Ethiopia January 2021

| Age group                                                                                                                     | Deaths in Treated hypertension cohort | Deaths in 'hypertension cohort' assuming no hypertension | Excess deaths in those with treated hypertension | Deaths in those with hypertension by treatment and control status * |                          |           |
|-------------------------------------------------------------------------------------------------------------------------------|---------------------------------------|----------------------------------------------------------|--------------------------------------------------|---------------------------------------------------------------------|--------------------------|-----------|
|                                                                                                                               |                                       |                                                          |                                                  | Treated and controlled                                              | Treated and uncontrolled | Untreated |
| <b>Men</b>                                                                                                                    |                                       |                                                          |                                                  |                                                                     |                          |           |
| 30-34                                                                                                                         | 1,436                                 | 448                                                      | 988                                              | 487                                                                 | 501                      | 295       |
| 35-39                                                                                                                         | 1,180                                 | 381                                                      | 799                                              | 401                                                                 | 398                      | 242       |
| 40-44                                                                                                                         | 1,027                                 | 428                                                      | 599                                              | 357                                                                 | 242                      | 191       |
| 45-49                                                                                                                         | 1,735                                 | 224                                                      | 1,511                                            | 1,167                                                               | 344                      | 163       |
| 50-54                                                                                                                         | 989                                   | 166                                                      | 823                                              | 370                                                                 | 453                      | 123       |
| 55-59                                                                                                                         | 731                                   | 123                                                      | 608                                              | 273                                                                 | 335                      | 91        |
| 60-64                                                                                                                         | 932                                   | 101                                                      | 831                                              | 362                                                                 | 469                      | 127       |
| Total                                                                                                                         | 8,030                                 | 1,871                                                    | 6,159                                            | 3,417                                                               | 2,742                    | 1,232     |
| <b>Women</b>                                                                                                                  |                                       |                                                          |                                                  |                                                                     |                          |           |
| 30-34                                                                                                                         | 1,401                                 | 415                                                      | 986                                              | 434                                                                 | 552                      | 310       |
| 35-39                                                                                                                         | 1,187                                 | 212                                                      | 975                                              | 368                                                                 | 607                      | 263       |
| 40-44                                                                                                                         | 1,019                                 | 287                                                      | 732                                              | 324                                                                 | 408                      | 205       |
| 45-49                                                                                                                         | 832                                   | 279                                                      | 553                                              | 265                                                                 | 288                      | 167       |
| 50-54                                                                                                                         | 887                                   | 91                                                       | 796                                              | 350                                                                 | 446                      | 137       |
| 55-59                                                                                                                         | 805                                   | 72                                                       | 733                                              | 277                                                                 | 456                      | 109       |
| 60-64                                                                                                                         | 1,071                                 | 147                                                      | 924                                              | 396                                                                 | 528                      | 154       |
| Total                                                                                                                         | 7,202                                 | 1,503                                                    | 5,699                                            | 2,414                                                               | 3,285                    | 1,345     |
| <b>Box sex total</b>                                                                                                          | 15,232                                | 3,374                                                    | 11,858                                           | 5,831                                                               | 6,027                    | 2,577     |
| * Excess deaths are all-cause deaths observed in those with hypertension compared to the same cohort assuming no hypertension |                                       |                                                          |                                                  |                                                                     |                          |           |

**Table 4:** Years of life lost (YLL) by adults with hypertension by treatment and control status over the lifetime simulated from life table modelling in Southern Ethiopia, January 2021

| Age group    | Years of life lived in treated hypertension cohort | Years of life lived in 'hypertension cohort' assuming no hypertension | YLL lost to Treated hypertension (excess) | YLL lost due to hypertension by treatment and control status * |                          | Years of life lived in untreated hypertension cohort | YLL lost due to Untreated hypertension |
|--------------|----------------------------------------------------|-----------------------------------------------------------------------|-------------------------------------------|----------------------------------------------------------------|--------------------------|------------------------------------------------------|----------------------------------------|
|              |                                                    |                                                                       |                                           | Treated and controlled                                         | Treated and uncontrolled |                                                      |                                        |
| <b>Men</b>   |                                                    |                                                                       |                                           |                                                                |                          |                                                      |                                        |
| 33-39        | 199.87                                             | 181.2                                                                 | 18.67                                     | 18.67                                                          | NA                       | 122.67                                               | 58.53                                  |
| 40-44        | 357.48                                             | 324.1                                                                 | 33.38                                     | 16.67                                                          | 17.71                    | 219.42                                               | 104.68                                 |
| 45-49        | 587.08                                             | 522.5                                                                 | 64.58                                     | NA                                                             | 64.58                    | 353.73                                               | 168.77                                 |
| 50-54        | 341.9                                              | 295.3                                                                 | 46.6                                      | NA                                                             | 46.6                     | 199.92                                               | 95.38                                  |
| 55-59        | 161.63                                             | 140.1                                                                 | 21.53                                     | NA                                                             | 21.53                    | 94.85                                                | 45.25                                  |
| 60-64        | 129.88                                             | 109.4                                                                 | 20.48                                     | NA                                                             | 20.48                    | 74.06                                                | 35.34                                  |
| Total        | 1777.84                                            | 1572.6                                                                | 205.24                                    | 35.34                                                          | 169.9                    | 1,064.65                                             | 507.95                                 |
| <b>Women</b> |                                                    |                                                                       |                                           |                                                                |                          |                                                      |                                        |
| 33-39        | 318.33                                             | 288.6                                                                 | 29.73                                     | 29.73                                                          | NA                       | 195.38                                               | 93.22                                  |
| 40-44        | 791.95                                             | 718                                                                   | 73.95                                     | 73.95                                                          | NA                       | 486.09                                               | 231.91                                 |
| 45-49        | 1147.34                                            | 1040.2                                                                | 107.14                                    | NA                                                             | 107.14                   | 704.22                                               | 335.98                                 |
| 50-54        | 953.59                                             | 863.8                                                                 | 89.79                                     | NA                                                             | 89.79                    |                                                      | 279.01                                 |
| 55-59        | 491.71                                             | 445.8                                                                 | 45.91                                     | NA                                                             | 45.91                    | 309.52                                               | 143.99                                 |
| 60-64        | 297.81                                             | 270                                                                   | 27.81                                     | NA                                                             | 27.81                    | 182.79                                               | 87.21                                  |
| Total        | 4,000.73                                           | 3626.4                                                                | 374.33                                    | 103.68                                                         | 270.65                   | 1,878.00                                             | 1,171.33                               |
| Grand total  | 5,778.57                                           | 5199                                                                  | 579.57                                    | 139.02                                                         | 440.55                   | 2,942.65                                             | <b>1,679.28</b>                        |

NA= No patient is reported in this age group; \* YLL=years of life lost by those with hypertension compared to the same cohort assuming no hypertension.

A total of 579.57 (205.24 men; 374.33 women) years of life were lost due to hypertension morbidity. This equates to \$US 19,436.56. A total of 11,858 (6,159 men; 5,699 women) years of life were lost due to hypertension related premature mortality. This equates to \$US 429,958.12. Total productivity loss due to premature mortality and morbidity was \$US 449,394.68 (Table 5). Treated and uncontrolled hypertension accounted for 2,937.72 (50.84%) of productive life years lost, followed by untreated hypertension 1,679.28 (29.06%). Treated uncontrolled hypertension contributed to more YLL due to premature mortality in both sexes 6,824 (44.8%), and life years lost due to hypertension morbidity 2, 9378 (50.84%) (Figure 2).

The overall estimated hypertension related economic burden (direct and indirect cost) was \$US 514,232.16 in the study area (Table 2 and Table 5). Since the study population is estimated to be 20% of the Southern region, the estimated economic burden of hypertension in the region is \$US 2,571,160.8 in the region. More than eight out of ten 87.37% dollars were due productivity loss. Productivity loss is calculated by taking 88% employment rate for men, 33% employment rate for women. Monthly wage of employed 2059.078 from EDHS 2016 and National STEPS survey 2015 which is adjusted for current inflation (1.3689). Unemployment/unpaid monthly wage of 796 ETB (Table 5).

**Table 5:** Mean annual productivity loss associated premature mortality and hypertension morbidity, Southern Ethiopia, January, 2021

| Variable                                 | Sex    | Excess Years lost | Lost productivity ETB | Lost productivity in 2021 USD |
|------------------------------------------|--------|-------------------|-----------------------|-------------------------------|
| Years lost due to premature mortality    | Male   | 6,159             | 11,748,345.71         | \$270,699.21                  |
|                                          | Female | 5,699             | 6,911,836.90          | \$159,258.91                  |
|                                          | Both   | 11,858            | 18,660,182.62         | \$429,958.12                  |
| Years lost due to hypertension morbidity | Male   | 205.24            | 391,497.07            | \$8,999.93                    |
|                                          | Female | 374.33            | 453,993.32            | \$10,436.63                   |
|                                          | Both   | 579.57            | 845,490.39            | \$19,436.56                   |
| Total productivity loss                  |        |                   | 19,505,673.01         | \$449,394.69                  |
| 1USD=43.5 ETB                            |        |                   |                       |                               |

**Note:** productivity loss is calculated by taking 88% employment rate for men, 33% employment rate for women. Monthly wage of employed 2059.078 from EDHS 2016 and National STEPS survey 2015 which is adjusted for current inflation (1.3689). Unemployment/unpaid monthly wage of 796 ETB

#### 4. Discussion

In this prevalence-based retrospective cost of illness study, we estimated the economic burden of hypertension among productive age population from societal perspective. A total direct (medical and non-medical) annual cost incurred due to hypertension in the study population was \$US 64,837.48 (\$US 13.308 per person per month). Out of direct costs, 80.0% (\$US 51,915.40) was direct medical cost. While, the total indirect annual cost incurred due to hypertension was \$US 449,394.69 (\$US 92.24 per person per month). The total annual economic burden of hypertension was \$US 514,232.16 (\$ US 1266.58 per person per year). This is higher than findings from another institution-based cross-sectional study conducted to evaluate cost of hypertension illness among patients attending hospitals in Southwest Shewa Zone that showed the mean monthly total cost of hypertension illness was US\$ 22.3 (95% CI, 21.3–23.3) (61). Findings from an institution-based cross-sectional study conducted to estimate the direct and indirect costs of hypertension at Gondar Specialized Hospital showed that total cost of hypertension was \$91.72 ± 78.65 per patient per year (62). The COI study conducted among 202 hypertensive patients in Ghana that showed the total annual treatment cost of hypertension was \$US 76,275.60 (\$US31.47 per person per month) (63). This variation could be explained by some uncertainties in our estimation (i.e. uncertainty in age and sex-specific prevalence of undiagnosed hypertension and variability in employment rate).

However, this is less than findings from a study conducted in Canada also showed that annual individual healthcare cost of hypertension was \$ US 2,341 (64), and study conducted in the USA showed that individuals with hypertension had \$ US 1,920 higher annual incremental expenditure (65). This variation could be explained by variation in socioeconomic and population health status, and asymptomatic nature of hypertension (66), a significant number of undiagnosed hypertension among adults, and difference in health care system and level of care.

1  
2  
3 In this study, indirect cost accounted for more than three fourth of hypertension-related costs 85.6%  
4 (\$449,394.69 USD). This is against evidence generated by a cross-sectional study conducted to determine the  
5 burden of out-of-pocket payments among patients with cardiovascular disease in public and private hospitals  
6 in Ibadan, South West, Nigeria showed that across all the hospital facilities, the annual direct and indirect  
7 outpatient costs were \$1164.2± \$2363.8 and \$52.87±\$148.05 respectively (67). An institution-based cross-  
8 sectional study conducted to estimate the direct and indirect costs of hypertension at Gondar Specialized  
9 Hospital showed that the direct medical and non-medical cost constituted 60.81% and 12.17% of the total  
10 cost of hypertension respectively (62). An institution-based cross-sectional study conducted to evaluate cost  
11 of hypertension illness among Patients Attending Hospitals in Southwest Shewa Zone showed that the mean  
12 monthly total cost of hypertension illness was US\$ 22.3 (direct cost of US\$ 11.39 and indirect cost US\$ 10.89)  
13 (61). This is also higher than evidence that suggested about a half of the costs associated with CVD burden are  
14 caused by direct healthcare costs (68). The findings from a study conducted in Ghana direct cost accounting  
15 for almost 70% of the total cost of managing hypertension (63). Similarly, a study conducted in rural Yunnan  
16 Province of China showed that direct costs represented the largest component of the economic cost of  
17 hypertension (69). The variation could be explained by significant number of productive age populations  
18 affected hypertension in the study area and poor blood pressure control. Therefore, it is important to promote  
19 existing strategies and develop country/region-specific strategies for hypertension prevention and control (i.e.,  
20 annual screening of the high-risk population and promoting healthy lifestyles) by all stakeholders could reduce  
21 the economic burden of hypertension Ethiopia (70, 71).

22  
23  
24  
25  
26  
27  
28  
29  
30  
31  
32  
33 Concerning pre-mature mortality, a total of 11,858 (6,159, men; 5,699 women) years were lost due to  
34 hypertension-related premature mortality. This equates \$US 429,958.12. Concerning health-related life loss,  
35 about 26,678 deaths per study population were due to hypertension. This is higher than the number of  
36 hypertension-related death occurred in 2017, which as 11,050 (7). This could be explained by the increasing  
37 trend of hypertension in the country.

38  
39  
40  
41  
42 From 11,585 years lost due to premature death in the treated hypertension cohort. More than one-half of related  
43 deaths, 6027 (50.83%) were due to treated uncontrolled hypertension. This is supported by evidence from other  
44 studies that revealed uncontrolled blood pressure cost \$370 billion globally in 2001 (72). This is because the  
45 relative risk of all-cause mortality is higher among treated and uncontrolled (1.62) than untreated (1.40) and  
46 treated controlled (1.12) patients (53).

47  
48  
49  
50 Untreated hypertension accounted for 1,679.28 (507.95 men, 1171.33 women) years of life lost. Treated and  
51 uncontrolled hypertension accounted for 440.55 (76.01%) of productive life years lost from treated  
52 hypertension cohort. This is higher than findings from a study conducted to estimate the economic burden of  
53 hypertension in a given year in rural Yunnan Province of China showed that the overall prevalence of and  
54

1  
2  
3 YLL/1000 population because of hypertension was 24.8% and 1.5 years for the survey population, respectively  
4 (69). A total of 579.57 (205.24 men; 374.33 women) years of life were lost due to treated hypertension. The  
5 estimated national life years lost due to hypertension is 19,319 (i.e., \$US 846,413.56). This is supported by  
6 evidence from a study conducted Australia that revealed hypertension caused 609,801 productivity-adjusted  
7 life years loss (equating to AUD\$ 137.2 billion) over the working lifetime (73). Therefore, prevention of  
8 hypertension and improving the rate of blood pressure control is important to reduce hypertension-related  
9 complications and productive life-year loss in the region as well as in the country (74).  
10  
11  
12  
13  
14

## 15 **5. Conclusion**

16 The societal economic burden of hypertension in Southern Ethiopia was substantial. Indirect costs accounted  
17 for more than eight out of 10 dollars economic burden. Prevention of hypertension could result in \$US  
18 2,571,160.8 annual economic savings in the Southern Region. Therefore, designing and implanting strategies  
19 for prevention of hypertension, early screening, and detection, and improving the rate of blood pressure control  
20 by involving all relevant stakeholders at all levels (national, regional, zonal, community, and patient-level) is  
21 critical to saving scarce health resources.  
22  
23  
24  
25  
26  
27  
28  
29  
30  
31  
32  
33  
34  
35  
36  
37  
38  
39  
40  
41  
42  
43  
44  
45  
46  
47  
48  
49  
50  
51  
52  
53  
54  
55  
56  
57  
58  
59  
60

## 6. Abbreviations

**BP:** Blood Pressure

**CPG:** Clinical Practice Guideline

**CVD:** Cardiovascular Diseases

**DALY:** Disability Adjusted Life Years

**DBP:** Diastolic Blood Pressure

**EDHS:** Ethiopia Demographic Health Survey

**HDL:** High-Density Lipoprotein

**ICER:** Incremental Cost-Effectiveness Analysis

**LDL:** Low-Density Lipoprotein

**LMICs:** Low- and Middle-income Countries

**MI:** Myocardial Infarction

**QALY:** Quality Adjusted Life Years

**SBP:** Systolic Blood Pressure

**VLDL:** Very Low-Density Lipoprotein

**WHO:** World Health Organization

**YLD:** Years Lived with Disability

**YLL:** Years of Life Lost



## 7. References

1. Whelton PK CR, Aronow WS, Casey DE Jr, Collins KJ, Dennison Himmelfarb C, DePalma SM, Gidding S, Jamerson KA, Jones DW, MacLaughlin EJ, Muntner P, Ovbigele B, Smith SC Jr, Spencer CC, Stafford RS, Taler SJ, Thomas RJ, Williams KA Sr, Williamson JD, Wright JT Jr. 2017 ACC/AHA/AAPA/ABC/ACPM/AGS/APhA/ASH/ASPC/NMA/PCNA guideline for the prevention, detection, evaluation, and management of high blood pressure in adults: a report of the American College of Cardiology/American Heart Association Task Force on Clinical Practice Guidelines. *Hypertension* (Dallas, Tex : 1979). 2018;71:e13-e115.
2. Institute. EPH. Ethiopia steps report on risk factors for chronic non-communicable diseases and prevalence of selected NCDs. 2016.
3. Thomas Unger, Claudio Borghi, Fadi Charchar, Nadia A. Khan, Neil R. Poulter, Dorairaj Prabhakaran, et al. 2020 International Society of Hypertension Global Hypertension Practice Guidelines. *Hypertension*. 2020;75(00):1-25.
4. O'Donnell MJ, Xavier D, Liu L, Zhang H, Chin SL, Rao-Melacini P, et al. Risk factors for Ischemic heart disease and Intracerebral Haemorrhagic stroke in 22 countries (the UNTERSTROKE study): a case-control study. *The Lancet*. 2010;376(9735):112-23.
5. Organization WH. A heavy burden: the productivity cost of illness in Africa. 2019.
6. Region WSEA. Special Issue on Blood Pressure-take control. India2013 World Health Day.
7. WHO. Health profile: Ethiopia. World Health Rankings: [Internet]. 2017. Available from: <https://www.worldlifeexpectancy.com/country-health-profile/ethiopia>.
8. Tarricone R. Cost-of-illness analysis: what room in health economics? *Health policy*. 2006;77(1):51-63.
9. Lesyuk W, Kriza C, Kolominsky-Rabas P. Cost-of-illness studies in heart failure: a systematic review 2004–2016. *BMC Cardiovascular Disorders*. 2018;18(1):74.
10. Menzin J, Marton JP, Menzin JA, Willke RJ, Woodward RM, Federico V. Lost productivity due to premature mortality in developed and emerging countries: an application to smoking cessation. *BMC medical research methodology*. 2012;12(1):87.
11. Liu J, Maniadakis N, Gray A, Rayner M. The economic burden of coronary heart disease in the UK. *Heart*. 2002;88(6):597-603.
12. Organization WH. WHO guide to identifying the economic consequences of disease and injury. 2009.
13. ICF C. Ethiopia Demographic and Health Survey 2016, Addis Ababa, Ethiopia, and Rockville, Maryland, USA: CSA and ICF. DF-1.6.
14. Massimo Volpe CS. Natural History of Treated and Untreated Hypertension. In: Berbari A., Mancia G. (eds) *Disorders of Blood Pressure Regulation. Updates in Hypertension and Cardiovascular Protection*. Springer, Cham: Springer, Cham; 2018.
15. Desa U. World population prospects 2019: Highlights. New York (US): United Nations Department for Economic and Social Affairs. 2019.
16. Norheim OF, Baltussen R, Johri M, Chisholm D, Nord E, Brock D, et al. Guidance on priority setting in health care (GPS-Health): the inclusion of equity criteria not captured by cost-effectiveness analysis. *Cost Eff Resour Alloc*. 2014;12:18-.
17. World Health Organization. It's time to walk the talk: WHO independent high-level commission on noncommunicable diseases final report. Geneva: World Health Organization; 2019. Licence: CC BY-NC-SA 3.0 IGO. 2019.
18. Ruhil R. The Changing Wealth of Nations 2018. Building a Sustainable Future. By Glenn-Marie Lange, Quentin Wodon and Kevin Carey; Washington DC: World Bank Group.© World Bank. IASSI-Quarterly. 2018;37(1):135-7.
19. Turin TC, Okamura T, Afzal AR, Rumana N, Watanabe M, Higashiyama A, et al. Hypertension and lifetime risk of stroke. *Journal of hypertension*. 2016;34(1):116-22.
20. Beyhaghi H, Viera A. Comparative Cost-Effectiveness of Clinic, Home, or Ambulatory Blood Pressure Measurement for Hypertension Diagnosis in US Adults: A Modeling Study. *Hypertension*. 2019;73(1):121-31.

21. Law M, Morris J, Wald N. Use of blood pressure lowering drugs in the prevention of cardiovascular disease: meta-analysis of 147 randomised trials in the context of expectations from prospective epidemiological studies. *Bmj*. 2009;338:b1665.
22. Kaptoge S, Pennells L, De Bacquer D, Cooney MT, Kavousi M, Stevens G, et al. World Health Organization cardiovascular disease risk charts: revised models to estimate risk in 21 global regions. *The Lancet Global Health*. 2019;7(10):e1332-e45.
23. Dawber TR. *The Framingham Study: the epidemiology of atherosclerotic disease*. Cambridge, MA: Harvard University Press; 1980.
24. Feinleib M, Kannel WB, Garrison RJ, McNamara PM, Castelli WP. The Framingham Offspring Study. Design and preliminary data. *Prev Med*. 1975;4(4):518-25.
25. Parish S, Collins R, Peto R, Youngman L, Barton J, Jayne K, et al. Cigarette smoking, tar yields, and non-fatal myocardial infarction: 14,000 cases and 32,000 controls in the United Kingdom. The International Studies of Infarct Survival (ISIS) Collaborators. *BMJ (Clinical research ed)*. 1995;311(7003):471-7.
26. Law MR, Morris JK, Wald NJ. Environmental tobacco smoke exposure and ischaemic heart disease: an evaluation of the evidence. *BMJ (Clinical research ed)*. 1997;315(7114):973-80.
27. Medical Expenditure Panel Survey. Medical Expenditure Panel Survey Public Use Files 1996-2001 [Available from: <http://www.meps.ahrq.gov/Puf/PufSearch.asp?SearchOption=Keyword>]
28. Huffman MD, Mohanan PP, Devarajan R, Baldrige AS, Kondal D, Zhao L, et al. Effect of a Quality Improvement Intervention on Clinical Outcomes in Patients in India With Acute Myocardial Infarction: The ACS QUIK Randomized Clinical Trial. *Jama*. 2018;319(6):567-78.
29. Witt BJ, Brown RD, Jr., Jacobsen SJ, Weston SA, Yawn BP, Roger VL. A community-based study of stroke incidence after myocardial infarction. *Annals of internal medicine*. 2005;143(11):785-92.
30. Yasui D, Asayama K, Ohkubo T, Kikuya M, Kanno A, Hara A, et al. Stroke Risk in Treated Hypertension Based on Home Blood Pressure: the Ohasama Study. *American Journal of Hypertension*. 2010;23(5):508-14.
31. Amarenco P, Bogousslavsky J, Callahan A, 3rd, Goldstein LB, Hennerici M, Rudolph AE, et al. High-dose atorvastatin after stroke or transient ischemic attack. *The New England journal of medicine*. 2006;355(6):549-59.
32. Appelros P, Gunnarsson KE, Terent A. Ten-year risk for myocardial infarction in patients with first-ever stroke: a community-based study. *Acta neurologica Scandinavica*. 2011;124(6):383-9.
33. Behar S, Tanne D, Abinader E, Agmon J, Barzilai J, Friedman Y, et al. Cerebrovascular accident complicating acute myocardial infarction: incidence, clinical significance and short- and long-term mortality rates. The SPRINT Study Group. *The American journal of medicine*. 1991;91(1):45-50.
34. Lakshminarayan K, Schissel C, Anderson DC, Vazquez G, Jacobs DR, Jr., Ezzeddine M, et al. Five-year rehospitalization outcomes in a cohort of patients with acute ischemic stroke: Medicare linkage study. *Stroke; a journal of cerebral circulation*. 2011;42(6):1556-62.
35. Prosser J, MacGregor L, Lees KR, Diener HC, Hacke W, Davis S. Predictors of early cardiac morbidity and mortality after ischemic stroke. *Stroke; a journal of cerebral circulation*. 2007;38(8):2295-302.
36. Touze E, Varenne O, Chatellier G, Peyrard S, Rothwell PM, Mas JL. Risk of myocardial infarction and vascular death after transient ischemic attack and ischemic stroke: a systematic review and meta-analysis. *Stroke; a journal of cerebral circulation*. 2005;36(12):2748-55.
37. Health MSf. *International Medical Products Price Guide: 2015 edition*. 2015.
38. Lee SE, Lee HY, Cho HJ, Choe WS, Kim H, Choi JO, et al. Clinical Characteristics and Outcome of Acute Heart Failure in Korea: Results from the Korean Acute Heart Failure Registry (KorAHF). *Korean circulation journal*. 2017;47(3):341-53.
39. Choi DJ, Han S, Jeon ES, Cho MC, Kim JJ, Yoo BS, et al. Characteristics, outcomes and predictors of long-term mortality for patients hospitalized for acute heart failure: a report from the Korean heart failure registry. *Korean circulation journal*. 2011;41(7):363-71.
40. Global, regional, and national age-sex-specific mortality for 282 causes of death in 195 countries and territories, 1980-2017: a systematic analysis for the Global Burden of Disease Study 2017. *Lancet (London, England)*. 2018;392(10159):1736-88.

41. Stenberg K, Lauer JA, Gkountouras G, Fitzpatrick C, Stanciole A. Econometric estimation of WHO-CHOICE country-specific costs for inpatient and outpatient health service delivery. *Cost Effectiveness and Resource Allocation*. 2018;16(1):11.
42. Health FMO. National strategic action plan (NSAP) for prevention & control of non-communicable diseases in Ethiopia, 2014-2016. 2014:43-7.
43. Mieraf Tadesse Tolla OFN, Solomon Tessema Memirie, Senbeta Guteta Abdisa, Awel Ababulgu, Degu Jerene, Melanie Bertram, Kirsten Strand, Stéphane Verguet and Kjell Arne Johansson. Prevention and treatment of cardiovascular disease in Ethiopia: cost-effectiveness analysis. *Cost Eff Resour Alloc* 2016;14(10).
44. Tan-Torres Edejer T, Acharya A, Adam Ta, Baltussen R, Evans DB, Hutubessy R, et al. Making choices in health: WHO guide to cost-effectiveness analysis. 2003.
45. Iftikhar A. Ethiopia Decent Work Check. Amsterdam: WageIndicator Foundation; 2019. p. 49.
46. Wang G, Zhang Z, Ayala C. Hospitalization Costs Associated With Hypertension as a Secondary Diagnosis Among Insured Patients Aged 18–64 Years. *American Journal of Hypertension*. 2010;23(3):275-81.
47. Kuriakose A, Nair Anish TS, Soman B, Varghese RT, Sreelal TP, Mendez AM, et al. Rate and Risk of All Cause Mortality among People with Known Hypertension in a Rural Community of Southern Kerala, India: The Results from the Prolife Cohort. *Int J Prev Med*. 2014;5(5):596-603.
48. Atlas. WD. Ethiopia - Crude death rate. 2020.
49. Kelemu Tilahun Kibret, Mesfin YM. Prevalence of hypertension in Ethiopia: a systematic meta-analysis. *Public Health Reviews* 2015;36(14).
50. WHO. Non-communicable diseases country profiles 2018. Geneva: World Health Organization. 2018.
51. Helelo TP GY, Adane AA. Prevalence and Associated Factors of Hypertension among Adults in Durame Town, Southern Ethiopia. *PLoS ONE*. 2014;9(11):e112790.
52. Shukuri A, Tewelde T, Shaweno T. Prevalence of old age hypertension and associated factors among older adults in rural Ethiopia. *Integrated blood pressure control*. 2019;12:23-31.
53. Zhou D, Xi B, Zhao M, Wang L, Veeranki SP. Uncontrolled hypertension increases risk of all-cause and cardiovascular disease mortality in US adults: the NHANES III Linked Mortality Study. *Sci Rep*. 2018;8(1):9418.
54. Najafi F, Karami-Matin B, Rezaei S, Khosravi A, Soofi M. Productivity costs and years of potential life lost associated with five leading causes of death: Evidence from Iran (2006-2010). *Med J Islam Repub Iran*. 2016;30:412-.
55. Noh J, Kim HC, Shin A, Yeom H, Jang S-Y, Lee JH, et al. Prevalence of Comorbidity among People with Hypertension: The Korea National Health and Nutrition Examination Survey 2007-2013. *Korean Circ J*. 2016;46(5):672-80.
56. Organization WH. WHO methods and data sources for global burden of disease estimates 2000-2016. *Global Health Estimates Technical Paper WHO/HIS/IER/GHE/20184*, WHO, Geneva. 2018.
57. Suchard MA, Schuemie MJ, Krumholz HM, You SC, Chen R, Pratt N, et al. Comprehensive comparative effectiveness and safety of first-line antihypertensive drug classes: a systematic, multinational, large-scale analysis. *Lancet*. 2019;394(10211):1816-26.
58. Law M, Wald N, Morris J, Jordan R. Value of low dose combination treatment with blood pressure lowering drugs: analysis of 354 randomised trials. *Bmj*. 2003;326(7404):1427.
59. Law MR, Morris JK, Wald NJ. Use of blood pressure lowering drugs in the prevention of cardiovascular disease: meta-analysis of 147 randomised trials in the context of expectations from prospective epidemiological studies. *BMJ (Clinical research ed)*. 2009;338:b1665.
60. Sorato MM, Davari M, Kebriaeezadeh A, Sarrafzadegan N, Shibru T, Fatemi B. Risk of fatal and nonfatal coronary heart disease and stroke events among adult patients with hypertension: basic Markov model inputs for evaluating cost-effectiveness of hypertension treatment: systematic review of cohort studies. *Journal of Pharmaceutical Health Services Research*. 2021;12(2).
61. Zawudie AB, Lemma TD, Daka DW. Cost of Hypertension Illness and Associated Factors Among Patients Attending Hospitals in Southwest Shewa Zone, Oromia Regional State, Ethiopia. *Clinicoecon Outcomes Res*. 2020;12:201-11.

- 1  
2  
3 62. Adane E, Atnafu A, Aschalew AY. The Cost of Illness of Hypertension and Associated Factors at the  
4 University of Gondar Comprehensive Specialized Hospital Northwest Ethiopia, 2018. *Clinicoecon Outcomes*  
5 *Res* [Internet]. 2020 2020; 12:[133-40 pp.]. Available from: <http://europepmc.org/abstract/MED/32184636>  
6  
7 <https://doi.org/10.2147/CEOR.S234674>  
8  
9 <https://europepmc.org/articles/PMC7064277>  
10  
11 <https://europepmc.org/articles/PMC7064277?pdf=render>.
- 12 63. Offei S. Economic Burden of Hypertension among Patients Attending Nsawam-Government Hospital  
13 in the Nsawam-Adoagyiri Municipality, Eastern Region, Ghana: University of Ghana; 2018.
- 14 64. Weaver CG, Clement FM, Campbell NRC, James MT, Klarenbach SW, Hemmelgarn BR, et al.  
15 Healthcare Costs Attributable to Hypertension. *Hypertension*. 2015;66(3):502-8.
- 16 65. Kirkland EB, Heincelman M, Bishu KG, Schumann SO, Schreiner A, Axon RN, et al. Trends in  
17 healthcare expenditures among US adults with hypertension: national estimates, 2003–2014. *Journal of the*  
18 *American Heart Association*. 2018;7(11):e008731.
- 19 66. Cohen JD. Hypertension epidemiology and economic burden: refining risk assessment to lower costs.  
20 *Managed care (Langhorne, Pa)*. 2009;18(10):51-8.
- 21 67. Adeniji F. Burden of out-of-pocket payments among patients with cardiovascular disease in public and  
22 private hospitals in Ibadan, South West, Nigeria: a cross-sectional study. *BMJ Open*. 2021;11(6):e044044-e.
- 23 68. Pogossova N. Costs associated with cardiovascular disease create a significant burden for society and  
24 they seem to be globally underestimated. *European Journal of Preventive Cardiology*. 2020;26(11):1147-9.
- 25 69. Le C, Zhankun S, Jun D, Keying Z. The economic burden of hypertension in rural south-west China.  
26 *Tropical Medicine & International Health*. 2012;17(12):1544-51.
- 27 70. Sorato MM, Davari M, Kebriaeezadeh A, Sarrafzadegan N, Shibru T, Fatemi B. Reasons for poor  
28 blood pressure control in Eastern Sub-Saharan Africa: looking into 4P's (primary care, professional, patient,  
29 and public health policy) for improving blood pressure control: a scoping review. *BMC Cardiovascular*  
30 *Disorders*. 2021;21(1):123.
- 31 71. Yoruk A, Boulous PK, Bisognano JD. The State of Hypertension in Sub-Saharan Africa: Review and  
32 Commentary. *American Journal of Hypertension*. 2017;31(4):387-8.
- 33 72. Gaziano TA, Bitton A, Anand S, Weinstein MC. The global cost of nonoptimal blood pressure. *Journal*  
34 *of hypertension*. 2009;27(7):1472-7.
- 35 73. Hird TR, Zomer E, Owen AJ, Magliano DJ, Liew D, Ademi Z. Productivity Burden of Hypertension  
36 in Australia: A Life Table Modeling Study. *Hypertension*. 2019;73(4):777-84.
- 37 74. Flack JM, Casciano R, Casciano J, Doyle J, Arikian S, Tang S, et al. Cardiovascular disease costs  
38 associated with uncontrolled hypertension. *Managed care interface*. 2002;15(11):28-36.  
39  
40  
41  
42  
43  
44  
45  
46  
47  
48  
49  
50  
51  
52  
53  
54  
55  
56  
57  
58  
59  
60

## Legends

## List of Figures

**Figure 1:** Micro-costing Bottom-up Approach for Healthcare costs. Adapted from Riewpaiboon A, et al. Cost analysis for efficient management: diabetes treatment at a public district hospital in Thailand.

**Figure 2:** Number of premature deaths and years of life lost (YLL) due to morbidity among adults with hypertension by sex, treatment and control status over productive life years simulated from life table modelling in Southern Ethiopia

For peer review only

1  
2  
3  
4  
5  
6  
7  
8  
9  
10  
11  
12  
13  
14  
15  
16  
17  
18  
19  
20  
21  
22  
23  
24  
25  
26  
27  
28  
29  
30  
31  
32  
33  
34  
35  
36  
37  
38  
39  
40  
41  
42  
43  
44  
45  
46  
47  
48  
49  
50  
51  
52  
53  
54  
55  
56  
57  
58  
59  
60

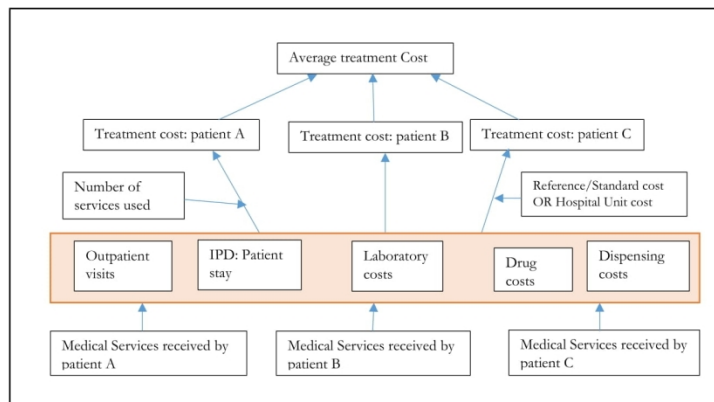

Figure 1: Micro-costing Bottom-up Approach for Healthcare costs. Adapted from Riewpaiboon A, et al. Cost analysis for efficient management: diabetes treatment at a public district hospital in Thailand.

599x776mm (72 x 72 DPI)



1  
2  
3  
4  
5  
6  
7  
8  
9  
10  
11  
12  
13  
14  
15  
16  
17  
18  
19  
20  
21  
22  
23  
24  
25  
26  
27  
28  
29  
30  
31  
32  
33  
34  
35  
36  
37  
38  
39  
40  
41  
42  
43  
44  
45  
46  
47  
48  
49  
50  
51  
52  
53  
54  
55  
56  
57  
58  
59  
60

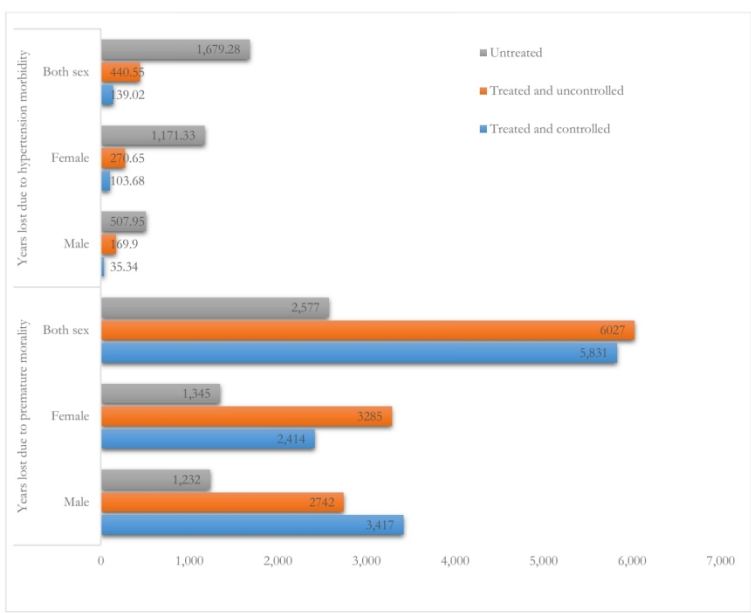

Figure 2: Number of premature deaths and years of life lost (YLL) due to morbidity among adults with hypertension by sex, treatment and control status over productive life years simulated from life table modelling in Southern Ethiopia

599x776mm (72 x 72 DPI)



**Supplementary materials:** Economic burden of hypertension at selected Hospitals in Southern Ethiopia; a patient level analysis

**Cardiovascular disease policy model**



**Supplementary Figure 1:** Cardiovascular disease policy model adapted for Sub-Saharan African perspective (1).

**Supplementary Table 1:** Age and sex specific distribution of Ethiopian population 2020 estimate, prevalence of hypertension and adult mortality rate

| Age structure                     | Male       | Female     | Total       | Estimated prevalence of hypertension | Mortality rate |         | Data Source |
|-----------------------------------|------------|------------|-------------|--------------------------------------|----------------|---------|-------------|
| <b>Prevalence of hypertension</b> |            |            |             |                                      | Men            | Women   | (2-8)       |
| 0-14 years                        | 21,657,152 | 21,381,628 | 43,038,780  | NA                                   | -              | -       |             |
| 15-19                             | 5,572,330  | 5,464,174  | 11,036,504  | 19.6                                 | 0.00286        | 0.00222 |             |
| 20-24                             | 5,930,683  | 5,816,173  | 11,746,856  | 19.6                                 | 0.00319        | 0.00223 |             |
| 25-29                             | 4,889,739  | 4,802,450  | 9,692,189   | 19.6                                 | 0.00293        | 0.00232 |             |
| 30-34                             | 3,761,349  | 3,757,544  | 7,518,893   | 23.0                                 | 0.00397        | 0.00368 |             |
| 35-39                             | 3,091,148  | 3,182,837  | 6,273,985   | 23.0                                 | 0.00411        | 0.00222 |             |
| 40-44                             | 2,445,523  | 2,488,422  | 4,933,945   | 25.9                                 | 0.00584        | 0.00385 |             |
| 45-49                             | 2,071,480  | 2,033,228  | 4,104,708   | 25.9                                 | 0.00360        | 0.00457 |             |
| 50-54                             | 1,567,789  | 1,660,957  | 3,228,746   | 41.9                                 | 0.00354        | 0.00274 |             |
| 55-59                             | 1,159,002  | 1,316,318  | 2,475,320   | 41.9                                 | 0.00354        | 0.00274 |             |
| 60-64                             | 946,594    | 1,109,670  | 2,056,264   | 41.9                                 | 0.00354        | 0.00274 |             |
| ≥ 65 years                        | 1,676,478  | 1,977,857  | 3,654,335   | 41.9                                 | 0.00354        | 0.00274 |             |
| Total                             | 54,769,267 | 54,991,258 | 109,760,525 |                                      |                |         |             |
|                                   |            |            |             | Prevalence of untreated hypertension |                |         |             |
| For all ages (15 +)               |            |            |             | 13.25                                |                |         | (9)         |

**Supplementary Table 2.** Model Parameters, Cohort Setting, and Probability of Transition between states and Disability weights for hypertension and related complications the Global Burden of Disease 2013 study and WHO Global Health Estimates

| Parameter                                                          | Data                                             | Source        |
|--------------------------------------------------------------------|--------------------------------------------------|---------------|
| Relative risk of hypertension treatment                            |                                                  |               |
| Relative risk of CHD event on hypertension treatment               | 0.683 (95% CI, 0.633–0.717)                      | (10-13)       |
| Relative risk of a cerebrovascular event on hypertension treatment | 0.633 (95% CI, 0.526–0.717)                      | (14)          |
| Relative risk of CHD event on normotensive men and women           | 0.49 (95% CI 0.458–0.513) and 0.32 (0.292–0.342) | (15)          |
| <b>Transition probabilities to death</b>                           |                                                  |               |
| <b>Health state</b>                                                | <b>Disability weight Estimate</b>                | <b>Source</b> |
| <b>Hypertension</b>                                                |                                                  | (16)          |
| Treated                                                            | 0.246                                            |               |
| Untreated                                                          | 0.323                                            |               |
| Treated and controlled                                             | 0.171                                            |               |
| <b>Myocardial Infarction (MI)</b>                                  |                                                  | (17)          |
| Day 1-2                                                            | 0.432                                            |               |
| Days 3-28                                                          | 0.074                                            |               |
| <b>Angina Pectoris</b>                                             |                                                  |               |
| Mild                                                               | 0.033                                            |               |
| Moderate                                                           | 0.080                                            |               |
| Severe                                                             | 0.167                                            |               |
| <b>Heart failure</b>                                               |                                                  | (18-20)       |
| Mild                                                               | 0.041                                            |               |
| Moderate                                                           | 0.072                                            |               |
| <b>Diabetes, digestive, and genitourinary disease</b>              |                                                  |               |
| <b>Diabetes</b>                                                    | 0.015 (0.012 - 0.018)                            | (18-20)       |
| <b>Treated</b>                                                     | 0.033                                            |               |
| <b>Untreated</b>                                                   | 0.012                                            |               |

|                                                 |                     |
|-------------------------------------------------|---------------------|
| Diabetic neuropathy                             | 0.133               |
| Chronic kidney disease (stage IV)               | 0.104               |
| End-stage renal disease: with kidney transplant | 0.024               |
| End-stage renal disease: on dialysis            | 0.571               |
| Disutility due to daily medication              | 0.049 (0.031–0.072) |
| <b>Acute Events</b>                             |                     |
| Myocardial Infarction                           | 0.432 (0.288–0.579) |
| Stroke                                          | 0.570 (0.377–0.707) |
| Occurrence of second or later CVD event         | 0.985 (0.992–0.989) |
| <b>Chronic States</b>                           |                     |
| Ischemic Heart Disease                          | 0.08 (0.02–0.24)    |
| Stroke                                          | 0.135 (0.01–0.437)  |
| Alive post 2+ CVD Events                        | 0.242 (0.11–0.437)  |

CHD, coronary heart disease; SMR, standardized mortality ratio. \*Age and sex dependent †Applied multiplicatively to general population age- and sex-dependent utilities; CHD= Angina pectoris, coronary insufficiency, myocardial infarction, or coronary death.

**Supplementary table 3:** Simulation input parameters

| Input parameter                                              | Value                                                                                                                                                                                                             | Source                                                                                             |
|--------------------------------------------------------------|-------------------------------------------------------------------------------------------------------------------------------------------------------------------------------------------------------------------|----------------------------------------------------------------------------------------------------|
| Non-CVD death rate                                           | 0.005–0.176 (Age- and sex specific)#                                                                                                                                                                              | Calculated from WHO lifetables and GBD 2017 (21)                                                   |
| Probability of first-time cardiovascular disease (CVD) event | Individual risk characteristic specific                                                                                                                                                                           | Obtained from the Globorisk Office Calculator standardized for India [25]                          |
| <b>Acute CVD events</b>                                      |                                                                                                                                                                                                                   |                                                                                                    |
| MI                                                           |                                                                                                                                                                                                                   |                                                                                                    |
| Probability of MI if CVD event occurs                        | 37.6– 66.7% (Age- and sex specific)#                                                                                                                                                                              | Calculated based on GBD 2017(21)                                                                   |
| 30-day fatality                                              | 0.01–0.13 (Age- and sex-specific)#                                                                                                                                                                                | Calibrated based on findings of Huffman et al. 2018 (22)                                           |
| Re-infarction (in 30 days)                                   | 0.0120 (0.0099–0.0141)ψ                                                                                                                                                                                           | ACS QUIK Study by Huffman et al. 2018 (22)                                                         |
| Acute Stroke (in 30 days)                                    | 0.0060 (0.0045–0.0075)ψ                                                                                                                                                                                           | ACS QUIK Study by Huffman et al. 2018 (22)                                                         |
| Stroke                                                       |                                                                                                                                                                                                                   |                                                                                                    |
| Probability of Stroke if CVD event occurs                    | 33.2–62.3% (Age- and sex specific)#                                                                                                                                                                               | Calculated based on GBD 2017 (21) And Jushua D. Bundry et al(23)                                   |
| 30-day fatality                                              | 0.12, 0.13 (Sex-specific)#                                                                                                                                                                                        | Calibrated based on a multi-site study by Pandian and Sudhan 2013 [30]                             |
| Repeat Stroke (in 30 days)                                   | 0.15 (0.1–0.2)ψ                                                                                                                                                                                                   | Petty et al. 1998 (24)                                                                             |
| Sudden cardiac death                                         | 0.10 per 100 patient-years (95% CI, 0.07–0.14) in a cohort of 33 of 3242 untreated hypertensive patients without evidence of coronary or cerebrovascular HD at entry and followed up for an average of 10.3 years | Heart disease and stroke statistics 2021 update                                                    |
| <b>Heart failure</b>                                         |                                                                                                                                                                                                                   |                                                                                                    |
| Probability of AHF                                           |                                                                                                                                                                                                                   |                                                                                                    |
| 30-days fatality                                             | 0.0945                                                                                                                                                                                                            | Obtained from the THESUS-HF registry (25) and Korean Acute Heart Failure Registry (KorAHF)(26, 27) |

|                                                                         |                                            |                                                                                                                                                                                                                              |
|-------------------------------------------------------------------------|--------------------------------------------|------------------------------------------------------------------------------------------------------------------------------------------------------------------------------------------------------------------------------|
| Re-hospitalization                                                      | 0.0736                                     | Obtained from the THESUS-HF registry (25)                                                                                                                                                                                    |
| <b>Chronic events</b>                                                   |                                            |                                                                                                                                                                                                                              |
| Monthly risk of mortality                                               | 0.001–0.019 (Age- and sex-specific)#       | Calibrated based on GBD 2017 (21)                                                                                                                                                                                            |
| Reinfarction                                                            | 0.079 (0.073–0.085)ψ                       | Based on Steg et al. 2007 (28) and derived by Lin et al. 2019 (20)                                                                                                                                                           |
| Acute Stroke                                                            | 0.014 (0.012–0.016)ψ                       | Based on Steg et al. 2007 (28) and derived by Lin et al. 2019 (20)<br>Continue Or Stop post-Stroke Antihypertensives Collaborative Study (COSSACS) (29), BP reduction and secondary stroke prevention: systematic review(30) |
| Stroke                                                                  |                                            |                                                                                                                                                                                                                              |
| Monthly risk of mortality                                               | 0.001–0.013 (Age- and sex specific)#       | Calibrated based on GBD 2017 (21)<br><br>Stroke Risk in Treated Hypertension Based on Home Blood Pressure: the Ohasama Study(31)                                                                                             |
| Acute MI                                                                | 0.043 (0.038–0.048)ψ                       | Based on Steg et al. 2007 (28) and derived by Lin et al. 2019 (20)                                                                                                                                                           |
| Acute Stroke                                                            | 0.037 (0.033–0.041)                        | Based on Steg et al. 2007 (28) and derived by Lin et al. 2019 (20)                                                                                                                                                           |
| Relative risk of fatality for an individual with two or more CVD events | 1.5                                        | Smolina et al. 2012 (32)                                                                                                                                                                                                     |
| <b>Heart failure</b>                                                    |                                            |                                                                                                                                                                                                                              |
| <b>Incidence</b>                                                        |                                            |                                                                                                                                                                                                                              |
| 1 year mortality                                                        |                                            |                                                                                                                                                                                                                              |
| Re-hospitalization                                                      |                                            | <b>Moita B.eta al. 2019(36) and (37)</b>                                                                                                                                                                                     |
| <b>Effect of antihypertensive medication</b>                            |                                            |                                                                                                                                                                                                                              |
| Medication protocol for an individual                                   | Initial SBP-specific#                      | Based on Ethiopian NCD control guideline                                                                                                                                                                                     |
| IHD relative risk due to medication                                     | 0.32–0.89 (Age- and initial SBP-specific)# | Based on findings by Law et al. 2009 (38) and Asayam Kei., 2017(39)                                                                                                                                                          |
| Stroke relative risk due to medication                                  | 0.20–0.89 (Age- and initial SBP-specific)# | Based on findings by Law et al. 2009(38)                                                                                                                                                                                     |
| IHD relative risk if partially adherent                                 | 0.66–0.95 (Age- and initial SBP-specific)  | Calculated based on a linear relationship between adherence and efficacy as considered by Cherry et al. 2009(40)                                                                                                             |
| Stroke relative risk if partially adherent                              | 0.60–0.95 (Age- and initial SBP-specific)  | Calculated based on a linear relationship between adherence and efficacy as considered by Cherry et al. 2009 (40) and Lisheng Liu, Zengwu Wang. et al(41)                                                                    |

**Supplementary Table 4:** Price of drugs, medical supplies, procedures and professional time used for management of hypertension in Southern Ethiopia, January, 2021

| List of medicines                                                                                        | Unit   | Price in 2021 Ethiopian birr |                          | Price USD                | Source                                                                                                                                 |
|----------------------------------------------------------------------------------------------------------|--------|------------------------------|--------------------------|--------------------------|----------------------------------------------------------------------------------------------------------------------------------------|
|                                                                                                          |        | Wholesale price              | Retail price             | Retail Price in 2021 USD |                                                                                                                                        |
| Acetylsalicylic Acid - 81mg – Tablet (coated)                                                            | 10x10  | 43.72                        | 1.32                     | 1.303                    | Ethiopian Pharmaceutical supply agency, Arba Minch Hub wholesale price 2021 and Arba Minch General hospital pharmacy retail price 2021 |
| Adrenaline (Epinephrine)-0.1% in 1mL ampoule                                                             | Each   | 36.032                       | 1.09                     | 1.074                    |                                                                                                                                        |
| Amiodarone - 100mg – Tablet                                                                              | 10x3   | 313.34                       | 9.44                     | 9.337                    |                                                                                                                                        |
| Amlodipine - 10mg - Tablet                                                                               | 10x10  | 105.44                       | 3.18                     | 3.142                    |                                                                                                                                        |
| Amlodipine - 5mg – Tablet                                                                                | 10x10  | 75.26                        | 2.27                     | 2.243                    |                                                                                                                                        |
| Atenolol - 50mg – Tablet                                                                                 | 10x10  | 58.70                        | 1.77                     | 1.749                    |                                                                                                                                        |
| Atorvastatin - 20mg – Tablet                                                                             | 10x10  | 195.68                       | 5.89                     | 5.831                    |                                                                                                                                        |
| Atorvastatin - 40mg – Tablet                                                                             | 10x3   | 140.76                       | 4.24                     | 4.195                    |                                                                                                                                        |
| Beclomethasone Propionate -100mcg/dose – Aerosol                                                         | 200 MD | 131.85                       | 3.97                     | 3.929                    |                                                                                                                                        |
| Candesartan - 8mg – Tablet                                                                               | 14x2   | 152.63                       | 4.60                     | 4.548                    |                                                                                                                                        |
| Captopril - 12.5mg – Tablet                                                                              | 10x10  | 33.54                        | 1.01                     | 1.000                    |                                                                                                                                        |
| Captopril - 25mg – Tablet                                                                                | 10x10  | 26.91                        | 0.81                     | 0.802                    |                                                                                                                                        |
| Dexamethasone - 4mg/ml in 1ml Ampoule - Injection                                                        | 10     | 3.95                         | 0.12                     | 0.118                    |                                                                                                                                        |
| Captopril + HCT (50mg + 25mg)-Tablet                                                                     | 10x10  | 57.32                        | 1.73                     | 1.708                    |                                                                                                                                        |
| Digoxin - 0.25mg – Tablet                                                                                | 10x10  | 202.18                       | 6.09                     | 6.025                    |                                                                                                                                        |
| Enalapril Maleate - 10mg - Tablet                                                                        | 10x10  | 61.57                        | 1.85                     | 1.835                    |                                                                                                                                        |
| Enalapril Maleate - 5mg – Tablet                                                                         | 10x10  | 63.92                        | 1.93                     | 1.905                    |                                                                                                                                        |
| Enalapril Maleate – 2.5mg – Tablet                                                                       | 10x10  | 19.98                        | 0.60                     | 0.595                    |                                                                                                                                        |
| Enalapril Maleate +HCT (10 mg + 25 mg)-tablet                                                            | 10x10  | 78.22                        | 2.36                     | 2.331                    |                                                                                                                                        |
| Glibenclamide - 5mg – Tablet                                                                             | 10x10  | 39.09                        | 1.18                     | 1.165                    |                                                                                                                                        |
| Glucose 40% in 20 mL – IV infusion                                                                       | Each   | 2.54                         | 0.08                     | 0.076                    |                                                                                                                                        |
| Glyceryl Trinitrate - 0.4mg – Tablet (Sublingual)                                                        | 100    | 487.21                       | 14.67                    | 14.518                   |                                                                                                                                        |
| Hydralazine - 20mg/ml in 1ml ampoule - Injection                                                         | 5      | 204.01                       | 6.14                     | 6.079                    |                                                                                                                                        |
| Hydrochlorothiazide - 25mg – Tablet                                                                      | 25x4   | 48.05                        | 1.45                     | 1.432                    |                                                                                                                                        |
| Insulin Isophane Biphasic (Soluble/Isophane Mixture)- (30 + 70)IU/ml in 10ml Vial -Injection(Suspension) | Each   | 85.20                        | 2.57                     | 2.539                    |                                                                                                                                        |
| Insulin Isophane Human - 100IU/ml in 10ml Vial - Injection(Suspension)                                   | Each   | 100.28                       | 3.02                     | 2.988                    |                                                                                                                                        |
| Insulin Soluble Human - 100IU/ml in 10ml Vial                                                            | Each   | 106.21                       | 3.20                     | 3.165                    |                                                                                                                                        |
| Lovastatin - 20mg – Tablet                                                                               | 10x10  | 84.59                        | 2.55                     | 2.521                    |                                                                                                                                        |
| Metformin - 500mg – Tablet                                                                               | 10     | 27.78                        | 0.84                     | 0.828                    |                                                                                                                                        |
| Methyldopa - 250mg – Tablet                                                                              | 100x10 | 51.75                        | 1.56                     | 1.542                    |                                                                                                                                        |
| Metoprolol - 50mg – Tablet                                                                               | 10x10  | 94.43                        | 2.84                     | 2.814                    |                                                                                                                                        |
| Morphine sulphate-30mg-tablet                                                                            | 110    | 410.71                       | 12.37                    | 12.239                   |                                                                                                                                        |
| Nifedipine - 20mg – Tablet                                                                               | 10x10  | 58.70                        | 1.77                     | 1.749                    |                                                                                                                                        |
| Prednisolone - 5 mg – Tablet                                                                             | 100x10 | 342.23                       | 10.31                    | 10.198                   |                                                                                                                                        |
| Propranolol - 40mg – Tablet                                                                              | 10x10  | 67.54                        | 2.03                     | 2.013                    |                                                                                                                                        |
| Propylthiouracil - 100mg - Tablet (Scored)                                                               | 100    | 633.87                       | 19.09                    | 18.889                   |                                                                                                                                        |
| Salbutamol - 0.1mg/dose - Aerosol (Oral Inhalation)                                                      | 200 MD | 117.20                       | 3.53                     | 3.492                    |                                                                                                                                        |
| Spirolactone - 25mg – Tablet                                                                             | 10x10  | 81.87                        | 2.47                     | 2.440                    |                                                                                                                                        |
| Thyroxin Sodium - 0.1mg – Tablet                                                                         | 100    | 178.49                       | 5.38                     | 5.319                    |                                                                                                                                        |
| Valsartan + HCT (80mg +12.5mg)                                                                           | 7*2    | 38.47                        | 1.16                     | 1.146                    |                                                                                                                                        |
| <b>Laboratory and imaging costs</b>                                                                      |        | <b>Price per test ETB</b>    | <b>Price in 2021 USD</b> |                          |                                                                                                                                        |
| CBC                                                                                                      |        | 75.00                        |                          | 1.72                     | Arba Minch General Hospital Laboratory service price 2021                                                                              |
| FBG/RBS                                                                                                  |        | 20.00                        |                          | 0.46                     |                                                                                                                                        |
| Lipid profile (LDL, HDL, Total cholesterol, Triglyceride)                                                |        | 160.00                       |                          | 3.68                     |                                                                                                                                        |
| ECG                                                                                                      |        | 120.00                       |                          | 2.76                     |                                                                                                                                        |
| ECO                                                                                                      |        | 350.00                       |                          | 8.05                     |                                                                                                                                        |
| CT-scan                                                                                                  |        | 1200                         |                          | 27.59                    |                                                                                                                                        |
| RFT (bilirubin, creatinine)                                                                              |        | 80.00                        |                          | 1.84                     |                                                                                                                                        |
| Chest-ray                                                                                                |        | 726                          |                          | 16.69                    |                                                                                                                                        |
| Urine analysis                                                                                           |        | 15.00                        |                          | 0.34                     |                                                                                                                                        |
| Body fluid analysis                                                                                      |        | 100.00                       |                          | 2.30                     |                                                                                                                                        |
| H. pylori                                                                                                |        | 50.00                        |                          | 1.15                     |                                                                                                                                        |

|                                                                                     |                                                                 |                                                                                                                                             |                                  |
|-------------------------------------------------------------------------------------|-----------------------------------------------------------------|---------------------------------------------------------------------------------------------------------------------------------------------|----------------------------------|
| Liver function test (AST, ALT, ALP)                                                 | 120.00                                                          | 2.76                                                                                                                                        |                                  |
| Thyroid function test (T3, T4, TSH)                                                 | 432.00                                                          | 9.93                                                                                                                                        |                                  |
| <b>Hospital bed days</b>                                                            |                                                                 |                                                                                                                                             |                                  |
| Primary hospital                                                                    | 52.52                                                           | 1.21                                                                                                                                        | WHO Choice (42) inflated to 2021 |
| Secondary hospital                                                                  | 54.76                                                           | 1.26                                                                                                                                        |                                  |
| Tertiary hospital                                                                   | 70.81                                                           | 1.63                                                                                                                                        |                                  |
| <b>Health facility visit</b>                                                        |                                                                 | 0.00                                                                                                                                        |                                  |
| Primary hospital                                                                    | 18.58                                                           | 0.43                                                                                                                                        |                                  |
| Secondary hospital                                                                  | 21.17                                                           | 0.49                                                                                                                                        |                                  |
| Tertiary hospital                                                                   | 22.06                                                           | 0.51                                                                                                                                        |                                  |
| Health center visit                                                                 | 23.00                                                           | 0.53                                                                                                                                        |                                  |
| PCI intervention                                                                    | 63,000.00                                                       | 1448.28                                                                                                                                     |                                  |
| In-patient costs for MI                                                             | 45240.00                                                        | 1040.00                                                                                                                                     |                                  |
| In-patient costs for Stroke                                                         | 40890.00                                                        | 940.00                                                                                                                                      |                                  |
| Outpatient cost for IHD (per annum)                                                 | 1957.50                                                         | 45.00                                                                                                                                       |                                  |
| Outpatient cost for Stroke (per annum)                                              | 2914.50                                                         | 67.00                                                                                                                                       |                                  |
| <b>Salary scale of human resource</b>                                               |                                                                 | 0.00                                                                                                                                        |                                  |
| Physician                                                                           | 21,100.00                                                       | 485.06                                                                                                                                      | MOH, Ethiopia 2012/2019 (43).    |
| Acute care nurse                                                                    | 7470.00                                                         | 171.72                                                                                                                                      |                                  |
| Pharmacy personnel                                                                  | 8047.00                                                         | 184.99                                                                                                                                      |                                  |
| Laboratory technician                                                               | 6460.00                                                         | 148.51                                                                                                                                      |                                  |
| Program cost per person per annum                                                   | 993.29                                                          | 22.83                                                                                                                                       |                                  |
| <b>Antihypertensive treatment</b>                                                   |                                                                 |                                                                                                                                             |                                  |
| Antihypertensive medication (per individual per annum)                              | Drug costs based on national Drug supply agency wholesale price |                                                                                                                                             |                                  |
| Out-patient consultations (per visit)                                               | \$43.36                                                         | Annual outpatient visit cost (12*WHO cost per outpatient visit inflated to 2021) WHO Choice (42)                                            |                                  |
| One-time diagnostic tests                                                           |                                                                 | Based on Laboratory procedures and test price of Arba Minch General Hospital, 2021                                                          |                                  |
| In-patient costs for MI                                                             | \$1040                                                          | WHO Choice (42) inflated to 2021                                                                                                            |                                  |
| In-patient costs for Stroke                                                         | \$940                                                           |                                                                                                                                             |                                  |
| <b>Chronic CVD care</b>                                                             |                                                                 |                                                                                                                                             |                                  |
| Secondary care medication in public sector (per individual per annum)               | \$92, \$184 (Dosage-specific)§                                  | MSH-2015 International Drug Price Indicator inflated to 2021(25)                                                                            |                                  |
| Outpatient cost for IHD (per annum)                                                 | \$45                                                            | WHO Choice (44) inflated to 2021                                                                                                            |                                  |
| Outpatient cost for Stroke (per annum)                                              | \$67                                                            |                                                                                                                                             |                                  |
| Average inflation rate Ethiopia                                                     | 16.58%                                                          | <a href="https://take-profit.org/en/statistics/inflation-rate/ethiopia/">https://take-profit.org/en/statistics/inflation-rate/ethiopia/</a> |                                  |
| Average inflation rate foreign                                                      | 2.02%                                                           |                                                                                                                                             |                                  |
| Percentage change                                                                   | 24.6%                                                           |                                                                                                                                             |                                  |
| Exchange rate July 2021 (1USD)                                                      | 43.5 ETB                                                        |                                                                                                                                             |                                  |
| 1USD = 20.999 ETB in 2016 and 43.5 in 2021; PPP= 12.1/8.1 = 1.5                     |                                                                 |                                                                                                                                             |                                  |
| MD: metered Dose; MOH: Ministry of Health 1 USD = 43.5 January 2021                 |                                                                 |                                                                                                                                             |                                  |
| <b>Note:</b> 30% mark-up at regional EPSA hub, 31% mark-up at Public Hospital level |                                                                 |                                                                                                                                             |                                  |

**Supplementary Table 5:** Risk of death across age and gender covariate categories stratified for hypertension

| Variables                         | Categories           | Incidence of death (%) |                | Relative risk in each category (CI) | Source |
|-----------------------------------|----------------------|------------------------|----------------|-------------------------------------|--------|
|                                   |                      | High BP group          | Normal         |                                     |        |
| Age                               | 20-29                | 1.68%                  | 0.54%          | 3.11 (1.16-8.36)                    | (8)    |
|                                   | 30-39                | 1.71%                  | 0.94%          | 1.82 (1.04-3.19)                    |        |
|                                   | 40-49                | 2.43%                  | 1.88%          | 1.29 (0.91-1.82)                    |        |
|                                   | 50-59                | 6.30%                  | 4.03%          | 1.56 (1.28-1.91)                    |        |
|                                   | 60 and above         | 19.32%                 | 15.9%          | 1.21 (1.12-1.31)                    |        |
| Gender                            | Women                | 8.71%                  | 1.1%           | 3.31 (2.98-3.68)                    | (8)    |
|                                   | Men                  | 15.47%                 | 4.62%          | 3.34(3.02-3.70)                     |        |
| <b>Risk of all case mortality</b> |                      |                        |                |                                     |        |
| Gender                            | Treatment status     | < 60 years             | > 60 years     | HR (95% CI)                         | (45)   |
| Men                               | Normal               | <b>0.0068</b>          | <b>0.0214</b>  | 1.00 (Reference)                    |        |
|                                   | Treated controlled   | <b>0.0188</b>          | <b>0.0305</b>  | 1.20 (0.92-1.57)                    |        |
|                                   | Treated uncontrolled | <b>0.0252</b>          | <b>0.0372</b>  | 1.55 (1.19-2.01)                    |        |
|                                   | Untreated            | <b>0.0197</b>          | <b>0.0336</b>  | 1.45 (1.23-1.72)                    |        |
| Women                             | Normal               | <b>0.00528</b>         | <b>0.01870</b> | 1.00 (Reference)                    |        |
|                                   | Treated controlled   | <b>0.01675</b>         | <b>0.02841</b> | 1.11 (0.84-1.47)                    |        |
|                                   | Treated uncontrolled | <b>0.02533</b>         | <b>0.03736</b> | 1.63 (1.34-1.99)                    |        |
|                                   | Untreated            | <b>0.02075</b>         | <b>0.03471</b> | 1.31 (1.06-1.61)                    |        |



**Supplementary Table 6:** Annual mortality rate in the total population, those with hypertension by treatment and control status and those without hypertension in Ethiopia in 2021 by age group and sex based on literature review of systematic reviews and clinical trials

| Age group    | Mortality rate in the total population | Mortality rate among people without hypertension | Mortality rate among people with treated and controlled hypertension | Mortality rate among people with treated but uncontrolled hypertension | Mortality rate among people with untreated hypertension | References                                                                      |
|--------------|----------------------------------------|--------------------------------------------------|----------------------------------------------------------------------|------------------------------------------------------------------------|---------------------------------------------------------|---------------------------------------------------------------------------------|
| <b>Women</b> |                                        |                                                  |                                                                      |                                                                        |                                                         |                                                                                 |
| 15-19        | 0.00222                                | 0.00222                                          | 0.016746                                                             | 0.025                                                                  | 0.02075                                                 | Ko, Min Jung, et al. 2016 (46), Mende Sorato, et al, 2021. (1, 23, 45, 47, 48). |
| 20-24        | 0.00223                                | 0.00223                                          | 0.016746                                                             | 0.025                                                                  | 0.02075                                                 |                                                                                 |
| 25-29        | 0.00232                                | 0.00232                                          | 0.016746                                                             | 0.025                                                                  | 0.02075                                                 |                                                                                 |
| 30-34        | 0.00368                                | 0.00368                                          | 0.016746                                                             | 0.025                                                                  | 0.02075                                                 |                                                                                 |
| 35-39        | 0.00222                                | 0.00222                                          | 0.016746                                                             | 0.025                                                                  | 0.02075                                                 |                                                                                 |
| 40-44        | 0.00385                                | 0.00385                                          | 0.016746                                                             | 0.025                                                                  | 0.02075                                                 |                                                                                 |
| 45-49        | 0.00457                                | 0.00457                                          | 0.016746                                                             | 0.025                                                                  | 0.02075                                                 |                                                                                 |
| 50-54        | 0.00182                                | 0.00182                                          | 0.016746                                                             | 0.025                                                                  | 0.02075                                                 |                                                                                 |
| 55-59        | 0.00182                                | 0.00182                                          | 0.016746                                                             | 0.025                                                                  | 0.02075                                                 |                                                                                 |
| 60 -64       | 0.00441                                | 0.00441                                          | 0.028414                                                             | 0.037                                                                  | 0.03471                                                 |                                                                                 |
| <b>Men</b>   |                                        |                                                  |                                                                      |                                                                        |                                                         |                                                                                 |
| 15-19        | 0.00286                                | 0.00286                                          | 0.018783                                                             | 0.025                                                                  | 0.01969                                                 | Kuriakose A. et al. 2014. (8), EDHS, 2016 (7, 45, 47-50)                        |
| 20-24        | 0.00319                                | 0.00319                                          | 0.018783                                                             | 0.025                                                                  | 0.01969                                                 |                                                                                 |
| 25-29        | 0.00293                                | 0.00293                                          | 0.018783                                                             | 0.025                                                                  | 0.01969                                                 |                                                                                 |
| 30-34        | 0.00397                                | 0.00397                                          | 0.018783                                                             | 0.025                                                                  | 0.01969                                                 |                                                                                 |
| 35-39        | 0.00411                                | 0.00411                                          | 0.018783                                                             | 0.025                                                                  | 0.01969                                                 |                                                                                 |
| 40-44        | 0.00584                                | 0.00584                                          | 0.018783                                                             | 0.025                                                                  | 0.01969                                                 |                                                                                 |
| 45-49        | 0.0036                                 | 0.0036                                           | 0.018783                                                             | 0.025                                                                  | 0.01969                                                 |                                                                                 |
| 50-54        | 0.00354                                | 0.00354                                          | 0.018783                                                             | 0.025                                                                  | 0.01969                                                 |                                                                                 |
| 55-59        | 0.00354                                | 0.00354                                          | 0.018783                                                             | 0.025                                                                  | 0.01969                                                 |                                                                                 |
| 60-64        | 0.00354                                | 0.00354                                          | 0.030451                                                             | 0.037                                                                  | 0.03365                                                 |                                                                                 |

## References

1. Sorato MM, Davari M, Kebriaeezadeh A, Sarrafzadegan N, Shibru T, Fatemi B. Risk of fatal and nonfatal coronary heart disease and stroke events among adult patients with hypertension: basic Markov model inputs for evaluating cost-effectiveness of hypertension treatment: systematic review of cohort studies. *Journal of Pharmaceutical Health Services Research*. 2021;12(2).
2. Institute. EPH. Ethiopia steps report on risk factors for chronic non-communicable diseases and prevalence of selected NCDs. 2016.
3. Kelemu Tilahun Kibret, Mesfin YM. Prevalence of hypertension in Ethiopia: a systematic meta-analysis. *Public Health Reviews* 2015;36(14).
4. WHO. Non-communicable diseases country profiles 2018. Geneva: World Health Organization. 2018.
5. Helelo TP GY, Adane AA. Prevalence and Associated Factors of Hypertension among Adults in Durame Town, Southern Ethiopia. *PLoS ONE*. 2014;9(11):e112790.
6. Shukuri A, Tewelde T, Shaweno T. Prevalence of old age hypertension and associated factors among older adults in rural Ethiopia. *Integrated blood pressure control*. 2019;12:23-31.
7. ICF C. Ethiopia Demographic and Health Survey 2016, Addis Ababa, Ethiopia, and Rockville, Maryland, USA: CSA and ICF. DF-1.6.
8. Kuriakose A, Nair Anish TS, Soman B, Varghese RT, Sreelal TP, Mendez AM, et al. Rate and Risk of All Cause Mortality among People with Known Hypertension in a Rural Community of Southern Kerala, India: The Results from the Prolife Cohort. *Int J Prev Med*. 2014;5(5):596-603.
9. Getachew F DA, Solomon D. Prevalence of Undiagnosed Hypertension and Associated Factors among Residents in Gulele Sub-City, Addis Ababa, Ethiopia. *J Community Med Health Educ*. 2018;8(590).
10. Antikainen R, Jousilahti P, Tuomilehto J. Systolic blood pressure, isolated systolic hypertension and risk of coronary heart disease, strokes, cardiovascular disease and all-cause mortality in the middle-aged population. *Journal of hypertension*. 1998;16(5):577-83.
11. Ford ES, Giles WH, Mokdad AH. The distribution of 10-year risk for coronary heart disease among US adults: findings from the National Health and Nutrition Examination Survey III. *Journal of the American College of Cardiology*. 2004;43(10):1791-6.
12. Collaborators GRF. Global, regional, and national comparative risk assessment of 84 behavioural, environmental and occupational, and metabolic risks or clusters of risks for 195 countries and territories, 1990–2017: a systematic analysis for the Global Burden of Disease Study 2017. *Lancet (London, England)*. 2018;392(10159):1923.
13. Flint AC, Conell C, Ren X, Banki NM, Chan SL, Rao VA, et al. Effect of systolic and diastolic blood pressure on cardiovascular outcomes. *New England Journal of Medicine*. 2019;381(3):243-51.
14. Rapsomaniki E, Timmis A, George J, Pujades-Rodriguez M, Shah AD, Denaxas S, et al. Blood pressure and incidence of twelve cardiovascular diseases: lifetime risks, healthy life-years lost, and age-specific associations in 1·25 million people. *The Lancet*. 2014;383(9932):1899-911.
15. Lloyd-Jones DM, Larson MG, Beiser A, Levy D. Lifetime risk of developing coronary heart disease. *The Lancet*. 1999;353(9147):89-92.
16. Organization WH. Disability weights, discounting and age weighting of DALYs. Available; 2016.
17. Salomon JA, Haagsma JA, Davis A, de Noordhout CM, Polinder S, Havelaar AH, et al. Disability weights for the Global Burden of Disease 2013 study. *The Lancet Global Health*. 2015;3(11):e712-e23.
18. Vos T, Allen C, Arora M, Barber RM, Bhutta ZA, Brown A, et al. Global, regional, and national incidence, prevalence, and years lived with disability for 310 diseases and injuries, 1990–2015: a systematic analysis for the Global Burden of Disease Study 2015. *The Lancet*. 2016;388(10053):1545-602.
19. Salomon JA, Vos T, Hogan DR, Gagnon M, Naghavi M, Mokdad A, et al. Common values in assessing health outcomes from disease and injury: disability weights measurement study for the Global Burden of Disease Study 2010. *Lancet (London, England)*. 2012;380(9859):2129-43.
20. Lin JK, Moran AE, Bibbins-Domingo K, Falase B, Pedroza Tobias A, Mandke CN, et al. Cost-effectiveness of a fixed-dose combination pill for secondary prevention of cardiovascular disease in China, India, Mexico, Nigeria, and South Africa: a modelling study. *The Lancet Global health*. 2019;7(10):e1346-e58.

21. Global, regional, and national age-sex-specific mortality for 282 causes of death in 195 countries and territories, 1980-2017: a systematic analysis for the Global Burden of Disease Study 2017. *Lancet* (London, England). 2018;392(10159):1736-88.
22. Huffman MD, Mohanan PP, Devarajan R, Baldrige AS, Kondal D, Zhao L, et al. Effect of a Quality Improvement Intervention on Clinical Outcomes in Patients in India With Acute Myocardial Infarction: The ACS QUIK Randomized Clinical Trial. *Jama*. 2018;319(6):567-78.
23. Bundy JD, Li C, Stuchlik P, Bu X, Kelly TN, Mills KT, et al. Systolic Blood Pressure Reduction and Risk of Cardiovascular Disease and Mortality: A Systematic Review and Network Meta-analysis. *JAMA Cardiology*. 2017;2(7):775-81.
24. Petty GW, Brown RD, Jr., Whisnant JP, Sicks JD, O'Fallon WM, Wiebers DO. Survival and recurrence after first cerebral infarction: a population-based study in Rochester, Minnesota, 1975 through 1989. *Neurology*. 1998;50(1):208-16.
25. Health MSf. International Medical Products Price Guide: 2015 edition. 2015.
26. Lee SE, Lee HY, Cho HJ, Choe WS, Kim H, Choi JO, et al. Clinical Characteristics and Outcome of Acute Heart Failure in Korea: Results from the Korean Acute Heart Failure Registry (KorAHF). *Korean circulation journal*. 2017;47(3):341-53.
27. Choi DJ, Han S, Jeon ES, Cho MC, Kim JJ, Yoo BS, et al. Characteristics, outcomes and predictors of long-term mortality for patients hospitalized for acute heart failure: a report from the Korean heart failure registry. *Korean circulation journal*. 2011;41(7):363-71.
28. Steg PG, Bhatt DL, Wilson PWF, D'Agostino R, Ohman EM, Röther J, et al. One-Year Cardiovascular Event Rates in Outpatients With Atherothrombosis. *Jama*. 2007;297(11):1197-206.
29. Robinson TG, Potter JF, Ford GA, Bulpitt CJ, Chernova J, Jagger C, et al. Effects of antihypertensive treatment after acute stroke in the Continue Or Stop post-Stroke Antihypertensives Collaborative Study (COSSACS): a prospective, randomised, open, blinded-endpoint trial. *The Lancet Neurology*. 2010;9(8):767-75.
30. Katsanos AH, Filippatou A, Manios E, Deftereos S, Parissis J, Frogoudaki A, et al. Blood Pressure Reduction and Secondary Stroke Prevention. *Hypertension*. 2017;69(1):171-9.
31. Yasui D, Asayama K, Ohkubo T, Kikuya M, Kanno A, Hara A, et al. Stroke Risk in Treated Hypertension Based on Home Blood Pressure: the Ohasama Study. *American Journal of Hypertension*. 2010;23(5):508-14.
32. Smolina K, Wright FL, Rayner M, Goldacre MJ. Long-Term Survival and Recurrence After Acute Myocardial Infarction in England, 2004 to 2010. *Circulation: Cardiovascular Quality and Outcomes*. 2012;5(4):532-40.
33. Butler J, Kalogeropoulos AP, Georgiopoulou VV, Bibbins-Domingo K, Najjar SS, Sutton-Tyrrell KC, et al. Systolic blood pressure and incident heart failure in the elderly. The Cardiovascular Health Study and the Health, Ageing and Body Composition Study. *Heart*. 2011;97(16):1304.
34. Piller LB, Baraniuk S, Simpson LM, Cushman WC, Massie BM, Einhorn PT, et al. Long-term follow-up of participants with heart failure in the antihypertensive and lipid-lowering treatment to prevent heart attack trial (ALLHAT). *Circulation*. 2011;124(17):1811-8.
35. Davis BR, Kostis JB, Simpson LM, Black HR, Cushman WC, Einhorn PT, et al. Heart Failure With Preserved and Reduced Left Ventricular Ejection Fraction in the Antihypertensive and Lipid-Lowering Treatment to Prevent Heart Attack Trial. *Circulation*. 2008;118(22):2259-67.
36. Moita B, Marques AP, Camacho AM, Leão Neves P, Santana R. One-year rehospitalisations for congestive heart failure in Portuguese NHS hospitals: a multilevel approach on patterns of use and contributing factors. *BMJ open*. 2019;9(9):e031346.
37. Chamberlain AM, Dunlay SM, Gerber Y, Manemann SM, Jiang R, Weston SA, et al. Burden and Timing of Hospitalizations in Heart Failure: A Community Study. *Mayo Clinic proceedings*. 2017;92(2):184-92.
38. Law MR, Morris JK, Wald NJ. Use of blood pressure lowering drugs in the prevention of cardiovascular disease: meta-analysis of 147 randomised trials in the context of expectations from prospective epidemiological studies. *BMJ (Clinical research ed)*. 2009;338:b1665.
39. Asayama K. Observational study and participant-level meta-analysis on antihypertensive drug treatment-related cardiovascular risk. *Hypertension Research*. 2017;40(10):856-60.

- 1  
2  
3 40. Cherry SB, Benner JS, Hussein MA, Tang SSK, Nichol MB. The Clinical and Economic Burden of  
4 Nonadherence with Antihypertensive and Lipid-Lowering Therapy in Hypertensive Patients. *Value in Health*.  
5 2009;12(4):489-97.
- 6 41. Liu L, Wang Z, Gong L, Zhang Y, Thijs L, Staessen JA, et al. Blood pressure reduction for the  
7 secondary prevention of stroke: a Chinese trial and a systematic review of the literature. *Hypertension Research*.  
8 2009;32(11):1032-40.
- 9 42. Stenberg K, Lauer JA, Gkoutouras G, Fitzpatrick C, Stanciole A. Econometric estimation of WHO-  
10 CHOICE country-specific costs for inpatient and outpatient health service delivery. *Cost Effectiveness and*  
11 *Resource Allocation*. 2018;16(1):11.
- 12 43. Health FMO. National strategic action plan (NSAP) for prevention & control of non-communicable  
13 diseases in Ethiopia, 2014-2016. 2014:43-7.
- 14 44. Organization WH. WHO-CHOICE Estimates of Cost for Inpatient and Outpatient Health Service  
15 Delivery.
- 16 45. Zhou D, Xi B, Zhao M, Wang L, Veeranki SP. Uncontrolled hypertension increases risk of all-cause  
17 and cardiovascular disease mortality in US adults: the NHANES III Linked Mortality Study. *Sci Rep*.  
18 2018;8(1):9418.
- 19 46. Ko MJ, Jo AJ, Park CM, Kim HJ, Kim YJ, Park D-W. Level of blood pressure control and  
20 cardiovascular events: SPRINT criteria versus the 2014 hypertension recommendations. *Journal of the*  
21 *American College of Cardiology*. 2016;67(24):2821-31.
- 22 47. Gu Q, Dillon CF, Burt VL, Gillum RF. Association of Hypertension Treatment and Control With All-  
23 Cause and Cardiovascular Disease Mortality Among US Adults With Hypertension. *American Journal of*  
24 *Hypertension*. 2010;23(1):38-45.
- 25 48. Murakami Y, Hozawa A, Okamura T, Ueshima H. Relation of Blood Pressure and All-Cause Mortality  
26 in 180 000 Japanese Participants. *Hypertension*. 2008;51(6):1483-91.
- 27 49. Nagai K, Yamagata K, Iseki K, Moriyama T, Tsuruya K, Fujimoto S, et al. Antihypertensive treatment  
28 and risk of cardiovascular mortality in patients with chronic kidney disease diagnosed based on the presence of  
29 proteinuria and renal function: A large longitudinal study in Japan. *PLoS One*. 2019;14(12):e0225812.
- 30 50. Gudmundsson LS, Johannsson M, Thorgeirsson G, Sigfusson N, Sigvaldason H, Wittelman JCM. Risk  
31 profiles and prognosis of treated and untreated hypertensive men and women in a population-based  
32 longitudinal study The Reykjavik Study. *Journal of Human Hypertension*. 2004;18(9):615-22.
- 33  
34  
35  
36  
37  
38  
39  
40  
41  
42  
43  
44  
45  
46  
47  
48  
49  
50  
51  
52  
53  
54  
55  
56  
57  
58  
59  
60

# Reporting checklist for economic evaluation of health interventions.

Based on the CHEERS guidelines.

## Instructions to authors

Complete this checklist by entering the page numbers from your manuscript where readers will find each of the items listed below.

Your article may not currently address all the items on the checklist. Please modify your text to include the missing information. If you are certain that an item does not apply, please write "n/a" and provide a short explanation.

Upload your completed checklist as an extra file when you submit to a journal.

In your methods section, say that you used the CHEERS reporting guidelines, and cite them as:

Husereau D, Drummond M, Petrou S, Carswell C, Moher D, Greenberg D, Augustovski F, Briggs AH, Mauskopf J, Loder E. Consolidated Health Economic Evaluation Reporting Standards (CHEERS) statement.

| Title | Reporting Item                                                                                                                                                                    | Page Number |
|-------|-----------------------------------------------------------------------------------------------------------------------------------------------------------------------------------|-------------|
|       | <p><a href="#">#1</a> Identify the study as an economic evaluation or use more specific terms such as “cost-effectiveness analysis”, and describe the interventions compared.</p> | 1           |

1 **Abstract**  
2  
3

4 [#2](#) Provide a structured summary of objectives, 1  
5  
6 perspective, setting, methods (including study  
7 design and inputs), results (including base case  
8 and uncertainty analyses), and conclusions  
9  
10  
11  
12  
13

14 **Introduction**  
15

16  
17 **Background and** [#3](#) Provide an explicit statement of the broader 2  
18 **objectives** context for the study. Present the study question  
19 and its relevance for health policy or practice  
20 decisions  
21  
22  
23  
24  
25  
26

27 **Methods**  
28

29  
30 **Target population** [#4](#) Describe characteristics of the base case 3  
31 **and subgroups** population and subgroups analysed, including why  
32 they were chosen.  
33  
34  
35  
36  
37

38 **Setting and location** [#5](#) State relevant aspects of the system(s) in which 3  
39 the decision(s) need(s) to be made.  
40  
41  
42

43 **Study perspective** [#6](#) Describe the perspective of the study and relate 3-10  
44 this to the costs being evaluated.  
45  
46  
47

48 **Comparators** [#7](#) Describe the interventions or strategies being 9  
49 compared and state why they were chosen.  
50  
51  
52  
53  
54  
55  
56  
57  
58  
59  
60

|    |                        |                     |                                                      |     |
|----|------------------------|---------------------|------------------------------------------------------|-----|
| 1  | Time horizon           | <a href="#">#8</a>  | State the time horizon(s) over which costs and       | 2   |
| 2  |                        |                     |                                                      |     |
| 3  |                        |                     |                                                      |     |
| 4  |                        |                     | consequences are being evaluated and say why         |     |
| 5  |                        |                     |                                                      |     |
| 6  |                        |                     | appropriate.                                         |     |
| 7  |                        |                     |                                                      |     |
| 8  |                        |                     |                                                      |     |
| 9  | Discount rate          | <a href="#">#9</a>  | Report the choice of discount rate(s) used for costs | 10  |
| 10 |                        |                     |                                                      |     |
| 11 |                        |                     | and outcomes and say why appropriate                 |     |
| 12 |                        |                     |                                                      |     |
| 13 |                        |                     |                                                      |     |
| 14 | Choice of health       | <a href="#">#10</a> | Describe what outcomes were used as the              | NA  |
| 15 |                        |                     |                                                      |     |
| 16 | outcomes               |                     | measure(s) of benefit in the evaluation and their    |     |
| 17 |                        |                     |                                                      |     |
| 18 |                        |                     | relevance for the type of analysis performed         |     |
| 19 |                        |                     |                                                      |     |
| 20 |                        |                     |                                                      |     |
| 21 |                        |                     |                                                      |     |
| 22 | Measurement of         | <a href="#">#11</a> | Single study-based estimates: Describe fully the     | 4-6 |
| 23 |                        |                     |                                                      |     |
| 24 | effectiveness          | <a href="#">a</a>   | design features of the single effectiveness study    |     |
| 25 |                        |                     |                                                      |     |
| 26 |                        |                     | and why the single study was a sufficient source of  |     |
| 27 |                        |                     |                                                      |     |
| 28 |                        |                     | clinical effectiveness data                          |     |
| 29 |                        |                     |                                                      |     |
| 30 |                        |                     |                                                      |     |
| 31 |                        |                     |                                                      |     |
| 32 | Measurement of         | <a href="#">#11</a> | Synthesis-based estimates: Describe fully the        | NA  |
| 33 |                        |                     |                                                      |     |
| 34 | effectiveness          | <a href="#">b</a>   | methods used for identification of included studies  |     |
| 35 |                        |                     |                                                      |     |
| 36 |                        |                     | and synthesis of clinical effectiveness data         |     |
| 37 |                        |                     |                                                      |     |
| 38 |                        |                     |                                                      |     |
| 39 | Measurement and        | <a href="#">#12</a> | If applicable, describe the population and methods   | NA  |
| 40 |                        |                     |                                                      |     |
| 41 | valuation of           |                     | used to elicit preferences for outcomes.             |     |
| 42 |                        |                     |                                                      |     |
| 43 |                        |                     |                                                      |     |
| 44 | preference based       |                     |                                                      |     |
| 45 |                        |                     |                                                      |     |
| 46 | outcomes               |                     |                                                      |     |
| 47 |                        |                     |                                                      |     |
| 48 |                        |                     |                                                      |     |
| 49 | **Estimating resources |                     |                                                      |     |
| 50 |                        |                     |                                                      |     |
| 51 |                        |                     |                                                      |     |
| 52 | and costs **           |                     |                                                      |     |
| 53 |                        |                     |                                                      |     |
| 54 |                        |                     |                                                      |     |
| 55 |                        | <a href="#">#13</a> | Single study-based economic evaluation: Describe     | NA  |
| 56 |                        |                     |                                                      |     |
| 57 |                        |                     |                                                      |     |
| 58 |                        | <a href="#">a</a>   | approaches used to estimate resource use             |     |
| 59 |                        |                     |                                                      |     |
| 60 |                        |                     |                                                      |     |



associated with the alternative interventions.

Describe primary or secondary research methods for valuing each resource item in terms of its unit cost. Describe any adjustments made to approximate to opportunity costs

## Methods

|    |                       |                     |                                                                                                                                                                                                                                                                                                                      |                        |
|----|-----------------------|---------------------|----------------------------------------------------------------------------------------------------------------------------------------------------------------------------------------------------------------------------------------------------------------------------------------------------------------------|------------------------|
| 16 | Estimating resources  | <a href="#">#13</a> | Model-based economic evaluation: Describe approaches and data sources used to estimate resource use associated with model health states. Describe primary or secondary research methods for valuing each resource item in terms of its unit cost. Describe any adjustments made to approximate to opportunity costs. | 6-9                    |
| 17 | and costs             | <a href="#">b</a>   |                                                                                                                                                                                                                                                                                                                      |                        |
| 32 | Currency, price date, | <a href="#">#14</a> | Report the dates of the estimated resource quantities and unit costs. Describe methods for adjusting estimated unit costs to the year of reported costs if necessary. Describe methods for converting costs into a common currency base and the exchange rate.                                                       | 9                      |
| 33 | and conversion        |                     |                                                                                                                                                                                                                                                                                                                      |                        |
| 47 | Choice of model       | <a href="#">#15</a> | Describe and give reasons for the specific type of decision analytical model used. Providing a figure to show model structure is strongly recommended.                                                                                                                                                               | Supplementary figure 1 |
| 54 | Assumptions           | <a href="#">#16</a> | Describe all structural or other assumptions underpinning the decision-analytical model.                                                                                                                                                                                                                             | 9                      |

|    |                    |                     |                                                      |    |
|----|--------------------|---------------------|------------------------------------------------------|----|
| 1  | Analytical methods | <a href="#">#17</a> | Describe all analytical methods supporting the       | 9  |
| 2  |                    |                     | evaluation. This could include methods for dealing   |    |
| 3  |                    |                     | with skewed, missing, or censored data;              |    |
| 4  |                    |                     | extrapolation methods; methods for pooling data;     |    |
| 5  |                    |                     | approaches to validate or make adjustments (such     |    |
| 6  |                    |                     | as half cycle corrections) to a model; and methods   |    |
| 7  |                    |                     | for handling population heterogeneity and            |    |
| 8  |                    |                     | uncertainty.                                         |    |
| 9  |                    |                     |                                                      |    |
| 10 |                    |                     |                                                      |    |
| 11 |                    |                     |                                                      |    |
| 12 |                    |                     |                                                      |    |
| 13 |                    |                     |                                                      |    |
| 14 |                    |                     |                                                      |    |
| 15 |                    |                     |                                                      |    |
| 16 |                    |                     |                                                      |    |
| 17 |                    |                     |                                                      |    |
| 18 |                    |                     |                                                      |    |
| 19 |                    |                     |                                                      |    |
| 20 | <b>Results</b>     |                     |                                                      |    |
| 21 |                    |                     |                                                      |    |
| 22 |                    |                     |                                                      |    |
| 23 | Study parameters   | <a href="#">#18</a> | Report the values, ranges, references, and, if used, | 11 |
| 24 |                    |                     | probability distributions for all parameters. Report |    |
| 25 |                    |                     | reasons or sources for distributions used to         |    |
| 26 |                    |                     | represent uncertainty where appropriate. Providing   |    |
| 27 |                    |                     | a table to show the input values is strongly         |    |
| 28 |                    |                     | recommended.                                         |    |
| 29 |                    |                     |                                                      |    |
| 30 |                    |                     |                                                      |    |
| 31 |                    |                     |                                                      |    |
| 32 |                    |                     |                                                      |    |
| 33 |                    |                     |                                                      |    |
| 34 |                    |                     |                                                      |    |
| 35 |                    |                     |                                                      |    |
| 36 |                    |                     |                                                      |    |
| 37 |                    |                     |                                                      |    |
| 38 | Incremental costs  | <a href="#">#19</a> | For each intervention, report mean values for the    | 11 |
| 39 |                    |                     | main categories of estimated costs and outcomes      |    |
| 40 | and outcomes       |                     | of interest, as well as mean differences between     |    |
| 41 |                    |                     | the comparator groups. If applicable, report         |    |
| 42 |                    |                     | incremental cost-effectiveness ratios.               |    |
| 43 |                    |                     |                                                      |    |
| 44 |                    |                     |                                                      |    |
| 45 |                    |                     |                                                      |    |
| 46 |                    |                     |                                                      |    |
| 47 |                    |                     |                                                      |    |
| 48 |                    |                     |                                                      |    |
| 49 |                    |                     |                                                      |    |
| 50 | Characterising     | <a href="#">#20</a> | Single study-based economic evaluation: Describe     | NA |
| 51 |                    |                     | the effects of sampling uncertainty for the          |    |
| 52 | uncertainty        | <a href="#">a</a>   | estimated incremental cost and incremental           |    |
| 53 |                    |                     | effectiveness parameters, together with the impact   |    |
| 54 |                    |                     |                                                      |    |
| 55 |                    |                     |                                                      |    |
| 56 |                    |                     |                                                      |    |
| 57 |                    |                     |                                                      |    |
| 58 |                    |                     |                                                      |    |
| 59 |                    |                     |                                                      |    |
| 60 |                    |                     |                                                      |    |

of methodological assumptions (such as discount rate, study perspective).

|    |                       |                     |                                                       |
|----|-----------------------|---------------------|-------------------------------------------------------|
| 1  |                       |                     |                                                       |
| 2  |                       |                     |                                                       |
| 3  |                       |                     |                                                       |
| 4  |                       |                     |                                                       |
| 5  |                       |                     |                                                       |
| 6  | Characterising        | <a href="#">#20</a> | Model-based economic evaluation: Describe the         |
| 7  |                       |                     |                                                       |
| 8  | uncertainty           | <a href="#">b</a>   | effects on the results of uncertainty for all input   |
| 9  |                       |                     |                                                       |
| 10 |                       |                     | parameters, and uncertainty related to the structure  |
| 11 |                       |                     |                                                       |
| 12 |                       |                     | of the model and assumptions.                         |
| 13 |                       |                     |                                                       |
| 14 |                       |                     |                                                       |
| 15 | Characterising        | <a href="#">#21</a> | If applicable, report differences in costs, outcomes, |
| 16 |                       |                     |                                                       |
| 17 | heterogeneity         |                     | or cost effectiveness that can be explained by        |
| 18 |                       |                     |                                                       |
| 19 |                       |                     | variations between subgroups of patients with         |
| 20 |                       |                     |                                                       |
| 21 |                       |                     | different baseline characteristics or other observed  |
| 22 |                       |                     |                                                       |
| 23 |                       |                     | variability in effects that are not reducible by more |
| 24 |                       |                     |                                                       |
| 25 |                       |                     | information.                                          |
| 26 |                       |                     |                                                       |
| 27 |                       |                     |                                                       |
| 28 |                       |                     |                                                       |
| 29 |                       |                     |                                                       |
| 30 | <b>Discussion</b>     |                     |                                                       |
| 31 |                       |                     |                                                       |
| 32 |                       |                     |                                                       |
| 33 | Study findings,       | <a href="#">#22</a> | Summarise key study findings and describe how         |
| 34 |                       |                     |                                                       |
| 35 | limitations,          |                     | they support the conclusions reached. Discuss         |
| 36 |                       |                     |                                                       |
| 37 | generalisability, and |                     | limitations and the generalisability of the findings  |
| 38 |                       |                     |                                                       |
| 39 | current knowledge     |                     | and how the findings fit with current knowledge.      |
| 40 |                       |                     |                                                       |
| 41 |                       |                     |                                                       |
| 42 |                       |                     |                                                       |
| 43 | <b>Other</b>          |                     |                                                       |
| 44 |                       |                     |                                                       |
| 45 |                       |                     |                                                       |
| 46 | Source of funding     | <a href="#">#23</a> | Describe how the study was funded and the role of     |
| 47 |                       |                     |                                                       |
| 48 |                       |                     | the funder in the identification, design, conduct,    |
| 49 |                       |                     |                                                       |
| 50 |                       |                     | and reporting of the analysis. Describe other non-    |
| 51 |                       |                     |                                                       |
| 52 |                       |                     | monetary sources of support                           |
| 53 |                       |                     |                                                       |
| 54 |                       |                     |                                                       |
| 55 |                       |                     |                                                       |
| 56 |                       |                     |                                                       |
| 57 |                       |                     |                                                       |
| 58 |                       |                     |                                                       |
| 59 |                       |                     |                                                       |
| 60 |                       |                     |                                                       |

1 Conflict of interest [#24](#) Describe any potential for conflict of interest of 23  
2  
3 study contributors in accordance with journal  
4 policy. In the absence of a journal policy, we  
5 recommend authors comply with International  
6 Committee of Medical Journal Editors  
7 recommendations  
8  
9  
10  
11  
12  
13  
14  
15

16 Notes:

- 17  
18
- 19 • 15: Supplementary figure 1 The CHEERS checklist is distributed under the terms of the Creative  
20 Commons Attribution License CC-BY-NC. This checklist was completed on 20. August 2021  
21 using <https://www.goodreports.org/>, a tool made by the [EQUATOR Network](#) in collaboration with  
22 [Penelope.ai](#)  
23  
24  
25  
26  
27  
28  
29  
30  
31  
32  
33  
34  
35  
36  
37  
38  
39  
40  
41  
42  
43  
44  
45  
46  
47  
48  
49  
50  
51  
52  
53  
54  
55  
56  
57  
58  
59  
60

# BMJ Open

## Societal economic burden of hypertension at selected hospitals in southern Ethiopia; a patient-level analysis

|                                 |                                                                                                                                                                                                                                                                                                                                                                                                                                                                                                                                                                                                                                                                                                                                                                                                                                    |
|---------------------------------|------------------------------------------------------------------------------------------------------------------------------------------------------------------------------------------------------------------------------------------------------------------------------------------------------------------------------------------------------------------------------------------------------------------------------------------------------------------------------------------------------------------------------------------------------------------------------------------------------------------------------------------------------------------------------------------------------------------------------------------------------------------------------------------------------------------------------------|
| Journal:                        | <i>BMJ Open</i>                                                                                                                                                                                                                                                                                                                                                                                                                                                                                                                                                                                                                                                                                                                                                                                                                    |
| Manuscript ID                   | bmjopen-2021-056627.R4                                                                                                                                                                                                                                                                                                                                                                                                                                                                                                                                                                                                                                                                                                                                                                                                             |
| Article Type:                   | Original research                                                                                                                                                                                                                                                                                                                                                                                                                                                                                                                                                                                                                                                                                                                                                                                                                  |
| Date Submitted by the Author:   | 08-Mar-2022                                                                                                                                                                                                                                                                                                                                                                                                                                                                                                                                                                                                                                                                                                                                                                                                                        |
| Complete List of Authors:       | Sorato, Mende; Arba Minch University, Department of Pharmacy; Tehran University of Medical Sciences, Faculty of Pharmacy, Department of Pharmacoeconomics and pharmaceutical Administration.<br>Davari, Majid; Tehran University of Medical Sciences, Faculty of Pharmacy, Department of Pharmacoeconomics and pharmaceutical Administration<br>Kebriaeezadeh, Abbas; Tehran University of Medical Sciences School of Pharmacy, Faculty of Pharmacy, Department of Pharmacoeconomics and pharmaceutical Administration<br>Sarrafzadegan, Nizal; Isfahan University of Medical Sciences, Isfahan Cardiovascular Research Center; University of British Columbia, School of Population and Public Health, Faculty of Medicine<br>Shibiru, Tamiru; Arba Minch University, School of Medicine, College of Medicine and Health Sciences |
| <b>Primary Subject Heading</b>: | Health economics                                                                                                                                                                                                                                                                                                                                                                                                                                                                                                                                                                                                                                                                                                                                                                                                                   |
| Secondary Subject Heading:      | Cardiovascular medicine, Health services research, Public health, Health policy                                                                                                                                                                                                                                                                                                                                                                                                                                                                                                                                                                                                                                                                                                                                                    |
| Keywords:                       | Health economics < HEALTH SERVICES ADMINISTRATION & MANAGEMENT, HEALTH ECONOMICS, Cardiology < INTERNAL MEDICINE, Hypertension < CARDIOLOGY                                                                                                                                                                                                                                                                                                                                                                                                                                                                                                                                                                                                                                                                                        |
|                                 |                                                                                                                                                                                                                                                                                                                                                                                                                                                                                                                                                                                                                                                                                                                                                                                                                                    |

SCHOLARONE™  
Manuscripts



I, the Submitting Author has the right to grant and does grant on behalf of all authors of the Work (as defined in the below author licence), an exclusive licence and/or a non-exclusive licence for contributions from authors who are: i) UK Crown employees; ii) where BMJ has agreed a CC-BY licence shall apply, and/or iii) in accordance with the terms applicable for US Federal Government officers or employees acting as part of their official duties; on a worldwide, perpetual, irrevocable, royalty-free basis to BMJ Publishing Group Ltd ("BMJ") its licensees and where the relevant Journal is co-owned by BMJ to the co-owners of the Journal, to publish the Work in this journal and any other BMJ products and to exploit all rights, as set out in our [licence](#).

The Submitting Author accepts and understands that any supply made under these terms is made by BMJ to the Submitting Author unless you are acting as an employee on behalf of your employer or a postgraduate student of an affiliated institution which is paying any applicable article publishing charge ("APC") for Open Access articles. Where the Submitting Author wishes to make the Work available on an Open Access basis (and intends to pay the relevant APC), the terms of reuse of such Open Access shall be governed by a Creative Commons licence – details of these licences and which [Creative Commons](#) licence will apply to this Work are set out in our licence referred to above.

Other than as permitted in any relevant BMJ Author's Self Archiving Policies, I confirm this Work has not been accepted for publication elsewhere, is not being considered for publication elsewhere and does not duplicate material already published. I confirm all authors consent to publication of this Work and authorise the granting of this licence.

# Societal economic burden of hypertension at selected hospitals in southern Ethiopia; a patient-level analysis

## Authors:

### 1. Mende Mensa Sorato\* (B.Pharm, MSc. PhD Candidate)

**Address:** Department of Pharmacy, Arba Minch University and Faculty of Pharmacy, Department of Pharmacoeconomics and pharmaceutical Administration.

Tehran University of Medical Sciences

Gmail: [mendemensa@gmail.com](mailto:mendemensa@gmail.com)

**ORCID:** [0000-0002-6342-0980](https://orcid.org/0000-0002-6342-0980)

Mobile: +98-9056309138

P.O. Box: 21

**Mailing Address:** Arba Minch Ethiopia

### 2. Dr. Majid Davari (PharmD, PhD in Health/Pharmacoeconomics)

Email: [M-davari@tums.ac.ir](mailto:M-davari@tums.ac.ir)

Mobile: [+98-9134128963](tel:+98-9134128963)

Address: Tehran University of Medical Sciences, Faculty of Pharmacy, Department of Pharmacoeconomics and pharmaceutical Administration

### 3. Dr. Abbas Kebriaeezadeh (PharmD, PhD in Pharmacology)

Email: [kebriace@tums.ac.ir](mailto:kebriace@tums.ac.ir)

Mobile: [+98-9122052460](tel:+98-9122052460)

**Address:** Tehran University of Medical Sciences, Faculty of Pharmacy, Department of Pharmacoeconomics and pharmaceutical Administration

### 4. Dr. Nizal Sarrafzadegan ( MTMD MPH, MD)

Email: [nsarrafzadegan@gmail.com](mailto:nsarrafzadegan@gmail.com)

**Address:** Director of Isfahan Cardiovascular Research Center, WHO Collaborating Center in EMR, Isfahan University of Medical Sciences

### 5. Dr. Tamiru Shibru (Internist)

Tel (cell): +251-911-70-47-67

Email: [drtamshib1@gmail.com](mailto:drtamshib1@gmail.com)

**Address:** Arba Minch University, *College of medicine and health sciences*

\* Corresponding Author

**Word Count:** 5757

**Number of references:** 74

**Abstract Count:** 300

**Key Words:** Hypertension; Economic burden of Hypertension; Cost of Illness study; Southern Ethiopia



## I. Abstract

**Objectives:** There is inadequate information on the economic burden of hypertension treatment in Ethiopia. Therefore, this study was conducted to determine the societal economic burden of hypertension at Selected Hospitals in Southern Ethiopia.

**Methods:** Prevalence-based cost of illness (COI) study from a societal perspective was conducted. Disability-adjusted life years (DALYs) were determined by the current world health organization's recommended DALY valuation method. Adjustment for comorbidity and a 3% discount was done for DALYs. The data entry, processing, and analysis were done by using SPSS version 21.0 and Microsoft Excel 2013.

**Results:** We followed a cohort of 406 adult hypertensive patients retrospectively for 10 years from September 2010 to 2020. Two hundred-fifty (61.6%) of patients were females with a mean age of  $55.87 \pm 11.03$  years. Less than 1 in five 75 (18.5%) of patients achieved their blood pressure control target. A total of 64,837.48 United States Dollar (\$US) direct cost was incurred due to hypertension. A total of 11,585 years and 579.57 years were lost due to hypertension-related premature mortality and morbidity respectively. Treated and uncontrolled hypertension accounted for 50.83% (6027) of total years lost due to premature mortality from treated hypertension cohort. Total productivity loss due to premature mortality and morbidity was \$US 449,394.69. The overall economic burden of hypertension was \$US 514,232.16 (\$ US 105.55 per person per month).

**Conclusion:** Societal economic burden of hypertension in Southern Ethiopia was substantial. Indirect costs accounted for more than eight out of 10 dollars. Treated and uncontrolled hypertension took the lion's share of economic cost and productivity loss due to premature mortality and morbidity. Therefore, designing and implanting strategies for the prevention of hypertension, early screening, and detection, and improving the rate of blood pressure control by involving all relevant stakeholders at all levels is critical to saving scarce health resources.

### Strengths and limitations of this study

- Using the cardiovascular disease policy model adapted to Sub-Saharan African perspective,
- Including productivity loss costs associated with hypertension (premature mortality and morbidity) and
- Obtaining all simulation variables and transition probability data from valid sources (systematic reviews, randomized controlled trials, and prospective cohort studies) were the strengths of this study
- Uncertainty in age and sex-specific prevalence of undiagnosed hypertension and variability in employment rate which require due consideration during applying the findings of this study were limitations.

## 1. Introduction

Hypertension doubles the risk of death from stroke, heart disease, vascular diseases, diabetes, atherosclerosis, and kidney disease (1). According to the national STEPS survey, only 28.4% of hypertensive patients were taking antihypertensive medication prescribed by professionals in Ethiopia (2). According to the International Society of hypertension global hypertension practice guideline 2020, hypertension remains the leading cause of death globally, accounting for 10.4 million deaths per year (3).

Hypertension is associated with societal and economic consequences particularly in Low and middle-income countries (LMICs). In addition to the direct costs associated with health care utilization for the management of complications, hypertension causes significant productivity loss from disability and premature death (4, 5). WHO report from South East Asian region also indicated huge impact of hypertension in national finances due to premature death, disability, personal and family disruption, loss of income, and healthcare expenditure (6). According to a WHO report in 2017, stroke, coronary heart disease, and hypertension caused 39,571, 46,943, and 11,050 deaths respectively (i.e. 30 patients per day die due hypertension) in Ethiopia (7).

Cost of illness (COI) study is used to measure the economic burden of disease to individuals, communities, and society as a whole. It can provide information to support the political process and healthcare decision-making if it is conducted from a societal perspective by using an appropriate approach and bottom-up costing strategy (8-10) (11, 12). Despite this huge impact on national economies, the economic burden of hypertension is not studied in Ethiopia particularly Southern Ethiopia. To fill this evidence gap, this study was conducted to determine the economic burden of hypertension at selected public hospitals in Southern Ethiopia by using the prevalence-based cost-of-illness method from a societal perspective to estimate the direct and indirect costs of hypertension in a given year (2021) in Southern Ethiopia.

## 2. Methods and Materials

### 2.1. Study design, Area and Period

A prevalence-based retrospective cost of illness study from societal perspective focusing on quantifying direct and indirect costs was conducted from September 2010- September 2020 in at three selected public hospitals Southern Ethiopia. The bottom-up approach was used to estimate the economic burden of hypertension in Southern Ethiopia (figure 1). The human capital approach was used to calculate indirect costs separately in males and females and also among different age groups. A prevalence-based COI model was constructed in which hypertensive patients were simulated from diagnosis through active treatment, palliative care, and death over 15-64 years. Age and sex-specific mortality rates, measures of productivity, and workforce statistics were used to simulate the progression of these cohorts until death or age 64 years. First, the model estimated cumulative years of life and DALYs lived for the working-age population who had hypertension. Then the

1  
2  
3 model re-simulated with the hypothetical assumption that they did not have hypertension, with relevant changes  
4 to mortality rates and productivity. We estimated the probability of death separately for (1) all-cause mortality  
5 in absence of hypertension and related complications and (2) mortality attributable to the included disease  
6 states. The first component was estimated using WHO Life Tables, and the second component was calculated  
7 based on standardized mortality ratios extracted from the literature. The natural history study conducted in  
8 1974 showed that the mortality rate was 1.85 (3.01 in males and 1.62 in females) (13). Interventional trials  
9 suggested that it could be possible to achieve effective BP targets in about 70% of patients by improving  
10 adherence and/or intensifying therapy (14).  
11  
12  
13  
14  
15

## 16 **2.2. Study populations**

17  
18 The study populations were selected adult hypertensive patients at three selected public hospitals. According  
19 to the world population prospect 2020 estimate (15). In the same year, the population of the Gamo zone  
20 accounted for 1.5% of the total population, Gofa, and South Omo Zone 1.5% of the total population. The  
21 target population is 3.0% total population of Ethiopia or 20% of the Southern Ethiopian population  
22 (6,208,034). Based on age distribution: 0-14 years are children, 15-24 years are early working age, 25-54 years  
23 are prime working age, 55-64 years are mature working age and  $\geq 65$  years are elderly (13).  
24  
25  
26  
27  
28

## 29 **2.3. Inclusion and exclusion criteria**

30  
31 We included all adult hypertensive patients having at least five years of follow-up visits before data collection  
32 and receiving care during the study period from selected facilities. However, patients who are unwilling to  
33 participate in this study, patients who have less than five years of follow-up, and incomplete patient records  
34 (don't contain follow-up BP records and refill medications, laboratory requests, and results) were excluded.  
35  
36  
37  
38

## 39 **2.4. Study Variables**

### 40 **Dependent Variables**

- 41 • Economic burden of hypertension

### 42 **Independent variables**

- 43 • Patient-related (socio-demographic characteristics, heart disease knowledge, healthy lifestyle and heart  
44 disease risk perception, presence of comorbidity, type of medications, treatment adherence, shared decision  
45 making, health-related quality Life)

### 46 **Cost related variables**

- 47 ○ **Medical costs** (inpatient hospital stay/hospitalization cost, outpatient clinic visit, drug acquisition costs,  
48 drug administration cost, laboratory test, and imaging study costs)

- **Non-medical costs** (transportation, meal, patient time cost due to treatment, cost due informal care by family or friends)
- **Indirect costs** (absenteeism, presenteeism, unemployment, early retirement, disability, premature death)

## 2.5. Sample Size and Sampling Technique

### 2.5.1. Sample size determination

The sample size was determined by using the single population proportion formula by taking prevalence of patients controlled their BP as 14% from WHO 2016 BP control rate report (16-18) and Z value of 1.96 at 95% confidence interval. We added 10% for non-response rate and two for design effect due to multi-stage sampling technique involvement. Finally, a formula giving a larger sample size was used. Total 407 hypertensive adult patients who are on follow-up care will be included.

$$n = \frac{(Z\alpha/2)^2 P (1-P)}{d^2} = 185$$

Where: **n** = is the sample size

$$= 185 + (185 * 10\%) = 203.5$$

$$= 203.5 * 2 = 407$$

- **Z<sup>2</sup>**= standard normal deviation, set at 1.96, correspond to the 95% confidence interval
- **d** = is the desired level of precision/margin of error (0.05)
- **p**= prevalence of patients taking anti-hypertensive (p=28.4%), and q is 1-p.

### 2.5.2. Sampling Techniques

A multi-stage simple random sampling technique was used. We randomly selected three zones from a total of 12 zones found in the Southern region. Three general public hospitals with experience of providing CVD care for at least five years from selected four zones were included in this study. The total sample size was allocated to these hospitals based on an estimated number of adult hypertensive patients attending respective hospitals (i.e., we included 212 patients from Arba Minch General Hospital, 107 patients from Jinka General Hospital, and 88 patients from Sawula General Hospital). Finally, a consecutive sampling technique was applied in each facility until the desired sample size was achieved.

## 2.6. Data collection tools and Procedures

### 2.6.1. Model input parameters

Key model input variables include; 2020 population of selected zones, hypertension prevalence by treatment and control status, Transition probabilities to death and healthy state, cost of diagnosis, and management. Among those with treated hypertension, treated and controlled hypertension was defined based on BP control target of ISH 2020 guideline (3). We used national STPES survey data to estimate the prevalence of cardiovascular risk factors (MI, angina, heart failure, stroke, TIA). Incorporating the risk factor prevalence data in the relevant Framingham risk equation, the age and sex-specific probability of CHD and cerebrovascular disease (i.e., stroke and transient ischemic attack) events were estimated. The probability of each health state

1  
2  
3 was calculated using the age- and sex-specific CHD and cerebrovascular disease event distributions (2, 19). To  
4 estimate the corresponding probabilities, separate relative risk estimates were used for CHD events (Stable  
5 Angina, Unstable Angina, and MI) and cerebrovascular diseases (Stroke and Transient Ischemic Attack),  
6 assuming that antihypertensive treatment affects the probability of every disease state similarly across all age  
7 and sex groups. Relative risk reductions attributable to antihypertensive treatment were extracted from the  
8 peer-reviewed literature (20-22).  
9  
10  
11

12  
13 The 2020 world population prospect estimate was used for the baseline population and number of 33-year-olds  
14 projected to enter the model population from 2020-2070 (15). The annual probability of coronary heart disease  
15 and stroke was based on national STEPS survey (2), and Framingham Heart Study (23) and the Framingham  
16 Offspring Study (24), by contextualizing to Ethiopian scenario. Incident coronary heart disease events were  
17 allocated to angina pectoris, myocardial infarction, or cardiac arrest. Prevalence, joint distributions, and means  
18 of Ethiopia risk factor values were estimated from the national STEPS survey (2). Annual transition rates  
19 between risk factor levels were calculated to preserve age-range trends over time. Betas for risk function for  
20 non-blood pressure risk factors were estimated separately for the risk of incident coronary heart disease events,  
21 incident strokes, and non-CVD deaths, using examinations 1-8 of the Framingham Offspring cohort (24). Risk  
22 factors are assumed to affect the incidence of MI, arrest, and angina in proportion to the overall incidence of  
23 coronary heart disease, except tobacco smokers are assumed to have a higher relative risk for infarction and  
24 arrest (25); and a proportionately lower coefficient for angina. Environmental tobacco exposure is assumed to  
25 carry a relative risk of 1.26 for MI and cardiac arrest compared with non-exposed non-smokers (26) but not to  
26 influence angina. The number of hospitalized MI were obtained from the national STEPS survey (2). Case-  
27 fatality rates and rates of MI in subgroups were estimated from national data and other complementary sources.  
28 Prehospital arrest deaths and out-of-hospital cardiac arrests surviving to hospital discharge were estimated from  
29 our effectiveness study (Supplementary Table 1).  
30  
31  
32  
33  
34  
35  
36  
37  
38  
39

40 Survival after a coronary heart disease event was estimated and calibrated based on national or international data  
41 sources (27, 28). Rates of coronary revascularizations was estimated from the National hospital discharge survey,  
42 with mortalities estimated from aggregated historical data. Stroke incidence was assumed to be independent of the  
43 risk of new-onset coronary heart disease in the same year. The number of hospitalized strokes cases was obtained  
44 from national and regional studies. The annual probabilities of stroke after MI (29, 30) and the probability of  
45 coronary heart disease in stroke patients were based on natural history studies and systematic reviews of blood  
46 pressure control trials (31-36). A 30-day heart failure mortality and re-hospitalization data were from the  
47 THESEUS-HF registry (37) and Korean Acute Heart Failure Registry (KorAHF)(38, 39) (Supplementary Table 2  
48 and 3).  
49  
50  
51  
52  
53  
54  
55  
56  
57  
58  
59  
60

1  
2  
3 The background prevalence of CVD by age, sex, and CVD disease state (stroke, coronary heart disease, or both  
4 stroke and coronary heart disease) in 2020 was estimated from the National Health Survey data (2) and GBD 2017  
5 (40). The background prevalence of prior coronary revascularization was estimated from revascularizations before  
6 2019 and estimated survival after revascularization, while model projections were used to infer the distribution of  
7 revascularization by CVD state. Age and sex-specific health care costs were estimated using national data, and our  
8 effectiveness data. Hospitalized stroke and coronary heart disease costs and acute stroke rehabilitation costs were  
9 estimated using WHO Choice (41) inflated to 2021. Outpatient consultations, and inpatient stay and bed days were  
10 also estimated from WHO choice (41) inflated to 2021. Chronic outpatient CVD costs additional to average  
11 background health care costs for the first year after the event and subsequent years were estimated for patients with  
12 a stroke or coronary heart disease diagnosis was pooled from the 2015 national STEPS survey. Average annual non-  
13 cardiovascular costs were estimated from the national STEPS survey (2), and EDHS 2016 survey (13).

### 21 **2.6.2. Cost estimation**

22 The outcomes measures are total discounted societal costs, cost/year, and cost/patient-year. This is the amount of  
23 health budget that could be saved by effective prevention and control of hypertension. The direct costs were divided  
24 into two subcategories: direct medical costs and direct non-medical costs. Direct medical costs include; inpatient  
25 stays, outpatient clinic visits, medical services, drug acquisition, dispensing, administration, monitoring, laboratory  
26 test, and imaging study costs. The costs associated with outpatient/inpatient visits were estimated by multiplying  
27 the numbers of outpatient visits related to hypertension by the outpatient costs per year (i.e., twelve times WHO  
28 cost per outpatient visit for secondary hospitals inflated to 2021) (41).

29  
30  
31  
32  
33  
34 Data concerning medications prescribed for the management of hypertension, and associated comorbidities, and  
35 laboratory tests and imaging studies were done were collected by patient chart abstraction in index year (2020). The  
36 cost of medications used for management of hypertension and associated comorbidities was taken from Ethiopian  
37 Pharmaceutical supply agency Arba Minch regional hub selling price and retail price of Arba Minch General  
38 Hospital in 2020. The retail price of Arba Minch General Hospital was used because of the minimum distance from  
39 the Pharmaceutical supply agency hub, which could minimize markup added on retail price due to transportation  
40 cost. Costs of laboratory procedures were also taken from Arba Minch Hospital Laboratory's service price list. The  
41 prices of relevant laboratory tests and imaging studies were based on the average price of included Hospitals. The  
42 salary scale of the health workforce was based on the FMOH of Ethiopia (Supplementary Table 4).

43  
44  
45  
46  
47  
48 Ongoing program costs for hypertension care was estimated from WHO tool outputs for CVD and diabetes care  
49 and National strategic action plan (NSAP) for prevention & control of non-communicable diseases in Ethiopia  
50 2014-2016 and adjusted for 2021 inflation target population (42). Adjustment for the study population was done by  
51 multiplying the national cost by the proportion of the study population (i.e., 3%). National and regional cost  
52 estimates were based on the proportion of patients studied (i.e. 3% and 20%). We considered this strategy since the  
53  
54  
55  
56  
57  
58



1  
2  
3 age and sex distribution of hypertension among different regions in the country is did not vary significantly. The  
4 collected cost data added up and averaged by using a bottom-up approach (Figure 1). Facility-based or reference  
5 costs were used during computing costs. The total medical cost of hypertension treatment was calculated as the  
6 sum of the product of medical costs with their respective unit prices. Costs were discounted at an annual rate of  
7 3% and reported in 2021 USD (43, 44).

8  
9  
10  
11 Direct non-medical costs include transportation costs and patient time costs due to care. The cost of patient time  
12 due to care was estimated by using the average daily wage of patients (97.00 ETB) which was calculated from 2912  
13  $\pm$  2732.24 average monthly income. Transportation cost was determined by using the cost of average traveling  
14 distance and local transportation tariff (42.00 ETB) in January 2021. According to EDHS 2016 survey showed that  
15 33% of women and 88% of men are currently employed (13). This proportion was used to determine the patient  
16 time cost due to care for employed groups. For the unemployed proportion, the average daily wage of daily laborers  
17 workers working 8 hours per day for 6 days per week was used (26.53 ETB) from the monthly wage of 796.00 ETB  
18 (420-1172 ETB) (45).

19  
20  
21 Indirect costs include cost hospitalization, productivity loss due to illness, and cost of death. Cost-of hypertension-  
22 related hospitalization was taken from WHO Choice (41), costs per inpatient stay and cost per inpatient bed day  
23 times duration of hospitalization inflated for 2021, and professional time (physician, nurse laboratory professional,  
24 and pharmacist time). If a patient had multiple admissions during the year, the costs for each admission were  
25 aggregated as the total costs (46).

### 26 27 28 **2.6.3. Mortality and morbidity estimations**

29  
30  
31 Age and sex-specific mortality rates among the adult general population in Ethiopia were taken from EDHS 2016  
32 survey and extrapolated to selected populations (13). According to EDHS 2016, the probability of dying before age  
33 50 years among adults  $\geq$  15 years were 10% and 12%, in women and men respectively (13). Due to the absence of  
34 mortality data specific to hypertension treatment and control status in Ethiopia, mortality risk in the general  
35 population was attributed to those with and without hypertension using sex-specific estimates of the relative risk  
36 (RR) of all-cause mortality associated with hypertension by treatment and control status was derived from a study  
37 conducted in India was used (47). A cohort study conducted in India among adults 20 years and above to determine  
38 the Rate and Risk of all-cause mortality among people with HTN showed that the incidence of deaths in the study  
39 was 4.28% during the follow-up period of 6 years. The relative risk of mortality was 3.13 (CI: 2.91-3.37) and 1.2 in  
40 the high BP group and at age of 60 years. The age-adjusted hazard ratio of all-cause mortality for the high BP group  
41 was 2.96 (2.56-3.42) (47) (Supplementary Tables 5 and 6).

42  
43  
44 In 2020 crude death rate of the Ethiopian population-based on global estimates was 6.29 deaths per 1000  
45 population (48). The estimated prevalence of hypertension among adults was calculated from National STEPS  
46 Survey 2016, systematic review and meta-analysis, and WHO report and local studies and the mean estimated  
47  
48  
49  
50  
51



prevalence of hypertension was 21.39% (2, 13, 47, 49-52). Only 28.4% of patients with hypertension are taking antihypertensive medication (2). The mean relative risk of all-cause mortality among hypertensive population when compared to those without hypertension was 1.39 (0.95 to 1.95) (53) (Supplementary Table 3).

Years of life lost due to hypertension morbidity was determined by first calculating disability weights for specific ages based on blood pressure control status (X). Then subtract this value (X) from the life expectancy of the Ethiopian population (i.e., 66.7 years for men, and 70.4 years for women) (Y). The productivity loss cost due to hypertension morbidity was calculated by multiplying Y with sex-specific employment rate based on a monthly average income of 2059.078 ETB from the National STEPS survey 2015 adjusted for 2021 inflation (13,13/9.57=1.372) STEPS Survey, 2015 (2). The EDHS 2016 survey showed that 33% of women and 88% of men are currently employed (13) and for unemployed, 2019 minimum average monthly earnings (ETB) of daily laborers reported by the MOLSA 796 ETB (420-1172 ETB) (45). Concerning, cost of productivity lost due to premature mortality: first we calculated potential years of life lost (YLL) by subtracting life expectancy from sex-specific age of death at which the death is recorded (Z). Then Z is multiplied by the number of deaths in each age group (Xi). Finally, we multiplied Xi with sex-specific employment rates like productivity loss due to hypertension-related morbidity above (54). Excess mortality and morbidity due to hypertension to hypertension were determined by subtracting age and sex-specific morbidity and mortality among the general population from the hypertensive cohort. Both were determined by using age, sex, and blood pressure treatment status mortality rate per 1000 person-years (Supplementary Table 6).

#### 2.6.4 Morbidity adjustment

Patients with hypertension may have more than one disease, the addition of YLDs across causes may result in overestimation of the total loss of health (55). Therefore, it is recommended to estimate comorbidities using the assumption of independence within age-sex groups (56):

$$P_{1+2} = P_1 + P_2 - (P_1 \times P_2) = 1 - (1 - P_1) \times (1 - P_2)$$

- Where  $P_{1+2}$  is the prevalence of the two comorbid diseases 1 and 2,
- $P_1$  is the prevalence of disease 1 and  $P_2$  is the prevalence of disease 2.

The combined disability weight for individuals with multiple conditions is estimated assuming a multiplicative model as follows:

$$DW_{1+2} = 1 - (1 - DW_1) \times (1 - DW_2)$$

Since prevalence YLDs are calculated for each cause as:

$$YLD_i = DW_i \times P_i$$

- two preceding equations can be combined into a single calculation resulting in:

$$YLD_{1+2} = 1 - (1 - YLD_1) \times (1 - YLD_2)$$

### 2.6.5 Assumptions and Transition probabilities

The counterfactual comparator (hypothetical cohort of normotensive individuals) with a probability of developing CVD events among the general population. Both in case and comparator cohorts, the probability of non-CV death does not depend on the health state and is similar for both hypertensive and normotensive populations (57) and we chose not to model differential use of antihypertensive medication classes in order not to bias cost-of-treatment. Antihypertensive dose intensification and frequency of BP monitoring were based on ISH 2020 guidelines for blood pressure control. We did not simulate the effects of any particular medication; instead, we simulated “standard dose” effects and assumed average drug prices across classes (58). The amount of blood pressure change was assumed to be a function of the baseline BP and the effect of a standard-dose antihypertensive agent at that pre-treatment level (59). We also assumed the medication adherence rate as 75% based on clinical trials (59). Other important assumptions include cost of illness due to hypertension or associated morbidities were calculated based on the monthly earnings during data collection; all costs incurred before one year were adjusted/accounted to today’s value (2021 USD equivalent) and discounted at 3%; years of life lost and years of life lived with disability (YLDs) were not discounted as per the recent WHO recommendations.

### 2.7. Data Quality control, Processing, and Analysis

Questionnaires are prepared in English and the patient interview part of the questionnaire was translated into Amharic and translated back into English to check its consistency. The Amharic version of the patient interview questionnaire and English version of the health professional interview, data abstraction form, and health system interview questionnaires was used for data collection. The questionnaire was pretested on 30 adult hypertensive patients in Arba Minch General Hospital to ensure that the respondents could understand the questions and to check for consistency and possible amendments were made based on findings. Six professional nurses (BSc.) for data collection and one senior professional working in the respective health facilities for supervision were oriented before data collection about data collection approaches and contents of data collection format for one day by the principal investigator. Continuous follow-up and supervision were made by the principal investigator throughout the data collection period. The collected data were checked for completeness and consistency by the principal investigator on daily basis at the spot during the data collection time. Then data were transcribed back to English for the patient interview part and entry was made using Epi-data 3.1 software. After data processing, analysis was done by using SPSS version 21.0 and Microsoft excel 2010. A summary of descriptive statistics was reported for socio-demographic factors; cost of hypertension and life years lost due to hypertension related morbidity and premature mortality and presented in tables and figures.

### 2.8. Patient and Public involvement

1  
2  
3 There was no identifiable patient involvement in this research. Patients' demographic characteristics and disease  
4 related variables were obtained by using questionnaire based interview after obtaining verbal consent from the  
5 patient. No patient identifier information was collected. Finally, most of variables were taken from published  
6 national and international literatures, and all relevant sources were acknowledged through citation.  
7  
8  
9

## 10 **2.8. Statements**

### 11 **Ethics approval and consent to participate**

12  
13 The study was approved by Tehran University of medical sciences, Faculty of pharmacy, department of  
14 pharmacoconomics, and pharmaceutical administration ethical review board with Approval ID:  
15 *IR.TUMS.MEDICINE.REC.1399.674* and Arba Minch University College of medicine and health sciences  
16 Institutional review board with Reference number: *IRB/T10/2012*. After clarifying the study objective and  
17 confidentiality of the information; verbal informed consent was obtained from each respective hospital before  
18 data collection.  
19  
20  
21  
22  
23  
24

### 25 **Consent for publication**

26  
27 All authors read the full version of this manuscript and agreed to publish  
28  
29

### 30 **Availability of data and materials**

31  
32 All the data reported in the manuscript are publicly available up on official request of principal investigator  
33 upon acceptance of the manuscript  
34  
35

### 36 **Competing interests**

37  
38 The authors declare that they have no competing interests.  
39  
40

### 41 **Funding**

42  
43 There is no funding source for the study.  
44  
45

### 46 **Authors' contributions**

47 All Authors read and approved the manuscript. *MM* conceived the research, framed the format design and  
48 developed the manuscript for publication; *MD* participated in data analysis and reviewed the manuscript and *AK*  
49 reviewed the manuscript and write-up process; *NS* and *TS* participated in literature review and polished the  
50 language of the manuscript.  
51  
52  
53  
54  
55  
56  
57  
58  
59  
60

### 3. Results

#### 3.1. Description of study participants

In this study, we estimated the regional and national economic burden of hypertension (direct and indirect costs) by using the cardiovascular disease policy model adapted to the Sub-Saharan Africa perspective (60) (Supplementary Figure 1). Total costs of treated hypertension and hypertension-related excess mortality and years of life lost due to hypertension were determined. We followed a cohort of 406 hypertensive patients retrospectively for 10 years from September 2003 to 2013 Ethiopian calendar (September 2010-2020) for baseline assessment and simulated the cost of hypertension for lifelong from a societal perspective. About two-thirds, 250 (61.6%) of patients were females with a mean age of  $55.87 \pm 11.03$  years. Less than 1 in five 75 (18.5%) of patients achieved their BP control target based on international society of hypertension 2020 guidelines (Table 1).

**Table 1:** Patient characteristics and Disease related factors among adult hypertensive patients on regular follow-up at selected public hospitals in Southern Ethiopia, January 2021 (n=406)

| Sociodemographic factors                 |                                 | Frequency   |
|------------------------------------------|---------------------------------|-------------|
| Sex                                      | Male                            | 156 (38.4%) |
|                                          | Female                          | 250 (61.6%) |
| Age in in years                          | Below 40 years                  | 15 (3.7%)   |
|                                          | 40- 65 years                    | 286 (70.4%) |
|                                          | 65 years and above              | 105 (25.9%) |
| Religion                                 | Orthodox                        | 215 (53.0%) |
|                                          | Muslim                          | 37 (9.1%)   |
|                                          | Protestant                      | 144 (35.5%) |
|                                          | Catholic                        | 10 (2.5%)   |
| Annual gross income before tax (n=406)   | Less than 12,000                | 117 (28.8%) |
|                                          | 12,000- 18,000                  | 89 (21.9%)  |
|                                          | 18,000- 23,000                  | 200 (49.2%) |
| Level of Education                       | Illiterate                      | 259 (63.8%) |
|                                          | Grades 1-8                      | 46 (11.3%)  |
|                                          | Grades 9-12                     | 22 (5.4%)   |
|                                          | College and above               | 73 (18.0%)  |
|                                          | Post-graduate degree            | 6 (1.5%)    |
| Occupation                               | Employed                        | 65 (16.0%)  |
|                                          | Merchant                        | 63 (15.5%)  |
|                                          | Farmer                          | 79 (19.5%)  |
|                                          | House wife                      | 149 (36.7%) |
| <b>Disease related factors</b>           |                                 |             |
| Duration of hypertension since diagnosis | 5 - 9 years                     | 262 (64.5%) |
|                                          | 10 - 14 years                   | 131 (32.3%) |
|                                          | 15 and above years              | 13 (3.2%)   |
| Family history of CVDs                   | 1 <sup>st</sup> degree relative | 133 (32.7%) |
|                                          | Second degree relative          | 16 (3.9%)   |
|                                          | None                            | 257 (63.3%) |
| Presence of comorbidities (n=406)        | Yes                             | 310 (76.4%) |
|                                          | No                              | 96 (23.6%)  |
| History of hospitalization               | Yes                             | 250 (61.6%) |

|                                                |                                 |             |
|------------------------------------------------|---------------------------------|-------------|
|                                                | No                              | 156 (38.4%) |
| Duration of hospitalization (n=250)            | Below 5 days                    | 56 (22.4%)  |
|                                                | 5 to 10 days                    | 112 (44.8%) |
|                                                | More than 10 days               | 82 (32.8%)  |
| Target BP achieved based on ISH 2020 guideline | Yes                             | 75 (18.5%)  |
|                                                | No                              | 331 (81.5%) |
| Antihypertensive regimen                       | Monotherapy                     | 136 (33.5%) |
|                                                | Two drug combination            | 234 (57.6%) |
|                                                | Three and more drug combination | 36 (8.8%)   |

### 3.2. Cost of hypertension

#### 3.2.1 Direct (medical and non-medical) costs

Direct medical costs include program costs, cost of drugs for hypertension and comorbidities, laboratory costs, hospitalization costs, annual outpatient visit costs, and costs of medical supplies. A total of \$US 64,837.48 direct cost was incurred due to hypertension. Out of this, 80.0% (\$US 51,915.40) was direct medical cost. From direct medical costs, annual outpatient visit cost 33.55% (\$US 17,419.73), cost of comorbidity 26.21% (\$13,612.15 USD), and laboratory test costs 8.17% (\$US 4,263.29) took the largest share. While, total direct non-medical costs of hypertension was \$US 9,866.58 (i.e. transportation costs and patient time costs due to care). The regional and national annual estimated direct cost of hypertension were \$US 324,187.40 and \$US 2,161,249.33 respectively (Table 2).

**Table 2:** Direct annual costs of treating hypertension among adults in Southern Ethiopia, January 2021 (n=406)

| Cost category                                                | Annual total in ETB<br>Total (mean $\pm$ Standard deviation) | Annual cost<br>in July 2021<br>USD | Percentage<br>from total<br>direct cost |
|--------------------------------------------------------------|--------------------------------------------------------------|------------------------------------|-----------------------------------------|
| <b>Direct medical total</b>                                  | <b>2,258,319.97</b>                                          | 51,915.40                          | 80.0%                                   |
| Program costs                                                | 403,275.70 (993.0 $\pm$ 0.00)                                | 9,173.40                           |                                         |
| Cost of antihypertensives                                    | 119,847.64 (295.19 $\pm$ 107.78)                             | 2,726.20                           |                                         |
| Cost of drugs for comorbidity                                | 598,409.00 (2266.7 $\pm$ 1114.52)                            | 13,612.15                          |                                         |
| Cost for hospitalization                                     | 179,377.03 (3360.76 $\pm$ 1594.69)                           | 4,080.33                           |                                         |
| Laboratory tests                                             | 187,420.00 (461.63 $\pm$ 226.98)                             | 4,263.29                           |                                         |
| Annual outpatient visit costs                                | 765,795.60 (1886.20 $\pm$ 0.00)                              | 17,419.73                          |                                         |
| Cost of medical supplies                                     | 4,195.00 (85.60 $\pm$ 0.00)                                  | 95.42                              |                                         |
| <b>Professional time total</b>                               | <b>128,362.01</b>                                            | 2,950.85                           | 4.6%                                    |
| Physician time                                               | 92,032.08 (226.68 $\pm$ 0.00)                                | 2,093.47                           |                                         |
| Nurse time                                                   | 2,060.28 (43.84 $\pm$ 17.81)                                 | 46.87                              |                                         |
| Pharmacy time                                                | 4,453.01 (10.97 $\pm$ 0.00)                                  | 101.29                             |                                         |
| Laboratory time                                              | 29,816.64 (73.44 $\pm$ 0.00)                                 | 678.25                             |                                         |
| <b>Direct non-medical costs</b>                              | <b>433,748.59</b> (1068.84 $\pm$ 384.78)                     | 9,866.58                           | <b>15.37%</b>                           |
| Total direct cost of treated hypertension                    | 2,820,430.57                                                 | 64,837.48                          | 100.00%                                 |
| 1USD= 43.9614 ETB on July 13, 2021                           |                                                              |                                    |                                         |
| <b>ETB:</b> Ethiopian Birr; <b>USD:</b> United States Dollar |                                                              |                                    |                                         |

### 3.2.2. Life years lost due to premature mortality and morbidity

We determined the years of life lost due to premature mortality (excess mortality) and years of life lost due to hypertension morbidity for the productive age population (30-64 years) among a cohort of simulated adult hypertensive patients. Excess mortalities are all-cause deaths observed in those with hypertension compared to the same cohort assuming no hypertension. The excess mortality and years of life lost were different among the hypertensive cohort and simulated population with no hypertension. A total of 11,858 (6,159, men; 5,699 women) life years were lost due to hypertension-related premature mortality among 30-64 years old adults with hypertension. This equates \$US 428,969.78 (\$US 270,076.91, men; \$US 158,892.78). The estimated regional and national life years lost due to premature mortality was 59,290 and 395,267 respectively. This is equivalent to \$US 2,144,848.58 and \$US 14,298,990.51 respectively. From 15,232 years lost due to premature mortality in the hypertension cohort, treated and uncontrolled hypertension accounted for more than 6,824 (44.8%) total years lost due to premature mortality followed by treated controlled hypertension 5,832 (38.29%) and untreated hypertension 2,575 (16.9%) (Table 3 and 4).

**Table 3:** Excess deaths among adult hypertensive by treatment and control status over the working lifetime simulated from life table modelling in Southern Ethiopia January 2021

| Age group            | Deaths in Treated hypertension cohort | Deaths in 'hypertension cohort' assuming no hypertension | Excess deaths in those with treated hypertension | Deaths in those with hypertension by treatment and control status * |                          |           |
|----------------------|---------------------------------------|----------------------------------------------------------|--------------------------------------------------|---------------------------------------------------------------------|--------------------------|-----------|
|                      |                                       |                                                          |                                                  | Treated and controlled                                              | Treated and uncontrolled | Untreated |
| <b>Men</b>           |                                       |                                                          |                                                  |                                                                     |                          |           |
| 30-34                | 1,436                                 | 448                                                      | 988                                              | 487                                                                 | 501                      | 295       |
| 35-39                | 1,180                                 | 381                                                      | 799                                              | 401                                                                 | 398                      | 242       |
| 40-44                | 1,027                                 | 428                                                      | 599                                              | 357                                                                 | 242                      | 191       |
| 45-49                | 1,735                                 | 224                                                      | 1,511                                            | 1,167                                                               | 344                      | 163       |
| 50-54                | 989                                   | 166                                                      | 823                                              | 370                                                                 | 453                      | 123       |
| 55-59                | 731                                   | 123                                                      | 608                                              | 273                                                                 | 335                      | 91        |
| 60-64                | 932                                   | 101                                                      | 831                                              | 362                                                                 | 469                      | 127       |
| Total                | 8,030                                 | 1,871                                                    | 6,159                                            | 3,417                                                               | 2,742                    | 1,232     |
| <b>Women</b>         |                                       |                                                          |                                                  |                                                                     |                          |           |
| 30-34                | 1,401                                 | 415                                                      | 986                                              | 434                                                                 | 552                      | 310       |
| 35-39                | 1,187                                 | 212                                                      | 975                                              | 368                                                                 | 607                      | 263       |
| 40-44                | 1,019                                 | 287                                                      | 732                                              | 324                                                                 | 408                      | 205       |
| 45-49                | 832                                   | 279                                                      | 553                                              | 265                                                                 | 288                      | 167       |
| 50-54                | 887                                   | 91                                                       | 796                                              | 350                                                                 | 446                      | 137       |
| 55-59                | 805                                   | 72                                                       | 733                                              | 277                                                                 | 456                      | 109       |
| 60-64                | 1,071                                 | 147                                                      | 924                                              | 396                                                                 | 528                      | 154       |
| Total                | 7,202                                 | 1,503                                                    | 5,699                                            | 2,414                                                               | 3,285                    | 1,345     |
| <b>Box sex total</b> | 15,232                                | 3,374                                                    | 11,858                                           | 5,831                                                               | 6,027                    | 2,577     |

\* Excess deaths are all-cause deaths observed in those with hypertension compared to the same cohort assuming no hypertension

**Table 4:** Years of life lost (YLL) by adults with hypertension by treatment and control status over the lifetime simulated from life table modelling in Southern Ethiopia, January 2021

| Age group    | Years of life lived in treated hypertension cohort | Years of life lived in 'hypertension cohort' assuming no hypertension | YLL lost to Treated hypertension (excess) | YLL lost due to hypertension by treatment and control status * |                          | Years of life lived in untreated hypertension cohort | YLL lost due to Untreated hypertension |
|--------------|----------------------------------------------------|-----------------------------------------------------------------------|-------------------------------------------|----------------------------------------------------------------|--------------------------|------------------------------------------------------|----------------------------------------|
|              |                                                    |                                                                       |                                           | Treated and controlled                                         | Treated and uncontrolled |                                                      |                                        |
| <b>Men</b>   |                                                    |                                                                       |                                           |                                                                |                          |                                                      |                                        |
| 33-39        | 199.87                                             | 181.2                                                                 | 18.67                                     | 18.67                                                          | NA                       | 122.67                                               | 58.53                                  |
| 40-44        | 357.48                                             | 324.1                                                                 | 33.38                                     | 16.67                                                          | 17.71                    | 219.42                                               | 104.68                                 |
| 45-49        | 587.08                                             | 522.5                                                                 | 64.58                                     | NA                                                             | 64.58                    | 353.73                                               | 168.77                                 |
| 50-54        | 341.9                                              | 295.3                                                                 | 46.6                                      | NA                                                             | 46.6                     | 199.92                                               | 95.38                                  |
| 55-59        | 161.63                                             | 140.1                                                                 | 21.53                                     | NA                                                             | 21.53                    | 94.85                                                | 45.25                                  |
| 60-64        | 129.88                                             | 109.4                                                                 | 20.48                                     | NA                                                             | 20.48                    | 74.06                                                | 35.34                                  |
| Total        | 1777.84                                            | 1572.6                                                                | 205.24                                    | 35.34                                                          | 169.9                    | 1,064.65                                             | 507.95                                 |
| <b>Women</b> |                                                    |                                                                       |                                           |                                                                |                          |                                                      |                                        |
| 33-39        | 318.33                                             | 288.6                                                                 | 29.73                                     | 29.73                                                          | NA                       | 195.38                                               | 93.22                                  |
| 40-44        | 791.95                                             | 718                                                                   | 73.95                                     | 73.95                                                          | NA                       | 486.09                                               | 231.91                                 |
| 45-49        | 1147.34                                            | 1040.2                                                                | 107.14                                    | NA                                                             | 107.14                   | 704.22                                               | 335.98                                 |
| 50-54        | 953.59                                             | 863.8                                                                 | 89.79                                     | NA                                                             | 89.79                    |                                                      | 279.01                                 |
| 55-59        | 491.71                                             | 445.8                                                                 | 45.91                                     | NA                                                             | 45.91                    | 309.52                                               | 143.99                                 |
| 60-64        | 297.81                                             | 270                                                                   | 27.81                                     | NA                                                             | 27.81                    | 182.79                                               | 87.21                                  |
| Total        | 4,000.73                                           | 3626.4                                                                | 374.33                                    | 103.68                                                         | 270.65                   | 1,878.00                                             | 1,171.33                               |
| Grand total  | 5,778.57                                           | 5199                                                                  | 579.57                                    | 139.02                                                         | 440.55                   | 2,942.65                                             | <b>1,679.28</b>                        |

NA= No patient is reported in this age group; \* YLL=years of life lost by those with hypertension compared to the same cohort assuming no hypertension.

A total of 579.57 (205.24 men; 374.33 women) years of life were lost due to hypertension morbidity. This equates to \$US 19,436.56. A total of 11,858 (6,159 men; 5,699 women) years of life were lost due to hypertension related premature mortality. This equates to \$US 429,958.12. Total productivity loss due to premature mortality and morbidity was \$US 449,394.68 (Table 5). Treated and uncontrolled hypertension accounted for 2,937.72 (50.84%) of productive life years lost, followed by untreated hypertension 1,679.28 (29.06%). Treated uncontrolled hypertension contributed to more YLL due to premature mortality in both sexes 6,824 (44.8%), and life years lost due to hypertension morbidity 2, 9378 (50.84%) (Figure 2).

The overall estimated hypertension related economic burden (direct and indirect cost) was \$US 514,232.16 in the study area (Table 2 and Table 5). Since the study population is estimated to be 20% of the Southern region, the estimated economic burden of hypertension in the region is \$US 2,571,160.8 in the region. More than eight out of ten 87.37% dollars were due productivity loss. Productivity loss is calculated by taking 88% employment rate for men, 33% employment rate for women. Monthly wage of employed 2059.078 from EDHS 2016 and National STEPS survey 2015 which is adjusted for current inflation (1.3689). Unemployment/unpaid monthly wage of 796 ETB (Table 5).



**Table 5:** Mean annual productivity loss associated premature mortality and hypertension morbidity, Southern Ethiopia, January, 2021

| Variable                                 | Sex    | Excess Years lost | Lost productivity ETB | Lost productivity in 2021 USD |
|------------------------------------------|--------|-------------------|-----------------------|-------------------------------|
| Years lost due to premature mortality    | Male   | 6,159             | 11,748,345.71         | \$270,699.21                  |
|                                          | Female | 5,699             | 6,911,836.90          | \$159,258.91                  |
|                                          | Both   | 11,858            | 18,660,182.62         | \$429,958.12                  |
| Years lost due to hypertension morbidity | Male   | 205.24            | 391,497.07            | \$8,999.93                    |
|                                          | Female | 374.33            | 453,993.32            | \$10,436.63                   |
|                                          | Both   | 579.57            | 845,490.39            | \$19,436.56                   |
| Total productivity loss                  |        |                   | 19,505,673.01         | \$449,394.69                  |
| 1USD=43.5 ETB                            |        |                   |                       |                               |

**Note:** productivity loss is calculated by taking 88% employment rate for men, 33% employment rate for women. Monthly wage of employed 2059.078 from EDHS 2016 and National STEPS survey 2015 which is adjusted for current inflation (1.3689). Unemployment/unpaid monthly wage of 796 ETB

#### 4. Discussion

In this prevalence-based retrospective cost of illness study, we estimated the economic burden of hypertension among productive age population from societal perspective. A total direct (medical and non-medical) annual cost incurred due to hypertension in the study population was \$US 64,837.48 (\$US 13.308 per person per month). Out of direct costs, 80.0% (\$US 51,915.40) was direct medical cost. While, the total indirect annual cost incurred due to hypertension was \$US 449,394.69 (\$US 92.24 per person per month). The total annual economic burden of hypertension was \$US 514,232.16 (\$ US 1266.58 per person per year). This is higher than findings from another institution-based cross-sectional study conducted to evaluate cost of hypertension illness among patients attending hospitals in Southwest Shewa Zone that showed the mean monthly total cost of hypertension illness was US\$ 22.3 (95% CI, 21.3–23.3) (61). Findings from an institution-based cross-sectional study conducted to estimate the direct and indirect costs of hypertension at Gondar Specialized Hospital showed that total cost of hypertension was \$91.72 ± 78.65 per patient per year (62). The COI study conducted among 202 hypertensive patients in Ghana that showed the total annual treatment cost of hypertension was \$US 76,275.60 (\$US31.47 per person per month) (63). This variation could be explained by some uncertainties in our estimation (i.e. uncertainty in age and sex-specific prevalence of undiagnosed hypertension and variability in employment rate). Consideration of fixed employment rate according to EDHS 2016 survey (i.e., 33% of women and 88% of men) could contribute to the relatively higher annual economic burden of hypertension in our study area (13).

However, this is less than findings from and a study conducted in Canada also showed that annual individual healthcare cost of hypertension was \$ US 2,341 (64), and study conducted in the USA showed that individuals with hypertension had \$ US 1,920 higher annual incremental expenditure (65). This variation could be explained by variation in socioeconomic and population health status, and asymptomatic nature of hypertension (66), a

1  
2  
3 significant number of undiagnosed hypertension among adults, and difference in health care system and level  
4 of care.  
5

6  
7 In this study, indirect cost accounted for more than three fourth of hypertension-related costs 85.6%  
8 (\$449,394.69 USD). This is against evidence generated by a cross-sectional study conducted to determine the  
9 burden of out-of-pocket payments among patients with cardiovascular disease in public and private hospitals  
10 in Ibadan, South West, Nigeria showed that across all the hospital facilities, the annual direct and indirect  
11 outpatient costs were \$1164.2± \$2363.8 and \$52.87±\$148.05 respectively (67). An institution-based cross-  
12 sectional study conducted to estimate the direct and indirect costs of hypertension at Gondar Specialized  
13 Hospital showed that the direct medical and non-medical cost constituted 60.81% and 12.17% of the total  
14 cost of hypertension respectively (62). An institution-based cross-sectional study conducted to evaluate cost  
15 of hypertension illness among Patients Attending Hospitals in Southwest Shewa Zone showed that the mean  
16 monthly total cost of hypertension illness was US\$ 22.3 (direct cost of US\$ 11.39 and indirect cost US\$ 10.89)  
17 (61). This is also higher than evidence that suggested about a half of the costs associated with CVD burden are  
18 caused by direct healthcare costs (68). The findings from a study conducted in Ghana direct cost accounting  
19 for almost 70% of the total cost of managing hypertension (63). Similarly, a study conducted in rural Yunnan  
20 Province of China showed that direct costs represented the largest component of the economic cost of  
21 hypertension (69). The variation could be explained by significant number of productive age populations  
22 affected hypertension in the study area and poor blood pressure control. Therefore, it is important to promote  
23 existing strategies and develop country/region-specific strategies for hypertension prevention and control (i.e.,  
24 annual screening of the high-risk population and promoting healthy lifestyles) by all stakeholders could reduce  
25 the economic burden of hypertension Ethiopia (70, 71).  
26  
27  
28  
29  
30  
31  
32  
33  
34  
35  
36

37 Concerning pre-mature mortality, a total of 11,858 (6,159, men; 5,699 women) years were lost due to  
38 hypertension-related premature mortality. This equates \$US 429,958.12. Concerning health-related life loss,  
39 about 26,678 deaths per study population were due to hypertension. This is higher than the number of  
40 hypertension-related death occurred in 2017, which as 11,050 (7). This could be explained by the increasing  
41 trend of hypertension in the country.  
42  
43  
44

45 From 11,585 years lost due to premature death in the treated hypertension cohort. More than one-half of related  
46 deaths, 6027 (50.83%) were due to treated uncontrolled hypertension. This is supported by evidence from other  
47 studies that revealed uncontrolled blood pressure cost \$370 billion globally in 2001 (72). This is because the  
48 relative risk of all-cause mortality is higher among treated and uncontrolled (1.62) than untreated (1.40) and  
49 treated controlled (1.12) patients (53).  
50  
51  
52

53  
54 Untreated hypertension accounted for 1,679.28 (507.95 men, 1171.33 women) years of life lost. Treated and  
55 uncontrolled hypertension accounted for 440.55 (76.01%) of productive life years lost from treated  
56  
57

1  
2  
3 hypertension cohort. This is higher than findings from a study conducted to estimate the economic burden of  
4 hypertension in a given year in rural Yunnan Province of China showed that the overall prevalence of and  
5 YLL/1000 population because of hypertension was 24.8% and 1.5 years for the survey population, respectively  
6 (69). A total of 579.57 (205.24 men; 374.33 women) years of life were lost due to treated hypertension. The  
7 estimated national life years lost due to hypertension is 19,319 (i.e., \$US 846,413.56). This is supported by  
8 evidence from a study conducted Australia that revealed hypertension caused 609,801 productivity-adjusted  
9 life years loss (equating to AUD\$ 137.2 billion) over the working lifetime (73). Therefore, prevention of  
10 hypertension and improving the rate of blood pressure control is important to reduce hypertension-related  
11 complications and productive life-year loss in the region as well as in the country (74).  
12  
13  
14  
15  
16  
17

## 18 **5. Conclusion**

19 The societal economic burden of hypertension in Southern Ethiopia was substantial. Indirect costs accounted  
20 for more than eight out of 10 dollars economic burden. Prevention of hypertension could result in \$US  
21 2,571,160.8 annual economic savings in the Southern Region. Therefore, designing and implanting strategies  
22 for prevention of hypertension, early screening, and detection, and improving the rate of blood pressure control  
23 by involving all relevant stakeholders at all levels (national, regional, zonal, community, and patient-level) is  
24 critical to saving scarce health resources.  
25  
26  
27  
28  
29  
30  
31  
32  
33  
34  
35  
36  
37  
38  
39  
40  
41  
42  
43  
44  
45  
46  
47  
48  
49  
50  
51  
52  
53  
54  
55  
56  
57  
58  
59  
60

## 6. Abbreviations

**BP:** Blood Pressure

**CPG:** Clinical Practice Guideline

**CVD:** Cardiovascular Diseases

**DALY:** Disability Adjusted Life Years

**DBP:** Diastolic Blood Pressure

**EDHS:** Ethiopia Demographic Health Survey

**HDL:** High-Density Lipoprotein

**ICER:** Incremental Cost-Effectiveness Analysis

**LDL:** Low-Density Lipoprotein

**LMICs:** Low- and Middle-income Countries

**MI:** Myocardial Infarction

**QALY:** Quality Adjusted Life Years

**SBP:** Systolic Blood Pressure

**VLDL:** Very Low-Density Lipoprotein

**WHO:** World Health Organization

**YLD:** Years Lived with Disability

**YLL:** Years of Life Lost

## 7. References

1. Whelton PK CR, Aronow WS, Casey DE Jr, Collins KJ, Dennison Himmelfarb C, DePalma SM, Gidding S, Jamerson KA, Jones DW, MacLaughlin EJ, Muntner P, Ovbigele B, Smith SC Jr, Spencer CC, Stafford RS, Taler SJ, Thomas RJ, Williams KA Sr, Williamson JD, Wright JT Jr. 2017 ACC/AHA/AAPA/ABC/ACPM/AGS/APhA/ASH/ASPC/NMA/PCNA guideline for the prevention, detection, evaluation, and management of high blood pressure in adults: a report of the American College of Cardiology/American Heart Association Task Force on Clinical Practice Guidelines. *Hypertension* (Dallas, Tex : 1979). 2018;71:e13-e115.
2. Institute. EPH. Ethiopia steps report on risk factors for chronic non-communicable diseases and prevalence of selected NCDs. 2016.
3. Thomas Unger, Claudio Borghi, Fadi Charchar, Nadia A. Khan, Neil R. Poulter, Dorairaj Prabhakaran, et al. 2020 International Society of Hypertension Global Hypertension Practice Guidelines. *Hypertension*. 2020;75(00):1-25.
4. O'Donnell MJ, Xavier D, Liu L, Zhang H, Chin SL, Rao-Melacini P, et al. Risk factors for Ischemic heart disease and Intracerebral Haemorrhagic stroke in 22 countries (the UNTERSTROKE study): a case-control study. *The Lancet*. 2010;376(9735):112-23.
5. Organization WH. A heavy burden: the productivity cost of illness in Africa. 2019.
6. Region WSEA. Special Issue on Blood Pressure-take control. India2013 World Health Day.
7. WHO. Health profile: Ethiopia. World Health Rankings: [Internet]. 2017. Available from: <https://www.worldlifeexpectancy.com/country-health-profile/ethiopia>.
8. Tarricone R. Cost-of-illness analysis: what room in health economics? *Health policy*. 2006;77(1):51-63.
9. Lesyuk W, Kriza C, Kolominsky-Rabas P. Cost-of-illness studies in heart failure: a systematic review 2004–2016. *BMC Cardiovascular Disorders*. 2018;18(1):74.
10. Menzin J, Marton JP, Menzin JA, Willke RJ, Woodward RM, Federico V. Lost productivity due to premature mortality in developed and emerging countries: an application to smoking cessation. *BMC medical research methodology*. 2012;12(1):87.
11. Liu J, Maniadakis N, Gray A, Rayner M. The economic burden of coronary heart disease in the UK. *Heart*. 2002;88(6):597-603.
12. Organization WH. WHO guide to identifying the economic consequences of disease and injury. 2009.
13. ICF C. Ethiopia Demographic and Health Survey 2016, Addis Ababa, Ethiopia, and Rockville, Maryland, USA: CSA and ICF. DF-1.6.
14. Massimo Volpe CS. Natural History of Treated and Untreated Hypertension. In: Berbari A., Mancia G. (eds) *Disorders of Blood Pressure Regulation. Updates in Hypertension and Cardiovascular Protection*. Springer, Cham: Springer, Cham; 2018.
15. Desa U. World population prospects 2019: Highlights. New York (US): United Nations Department for Economic and Social Affairs. 2019.
16. Norheim OF, Baltussen R, Johri M, Chisholm D, Nord E, Brock D, et al. Guidance on priority setting in health care (GPS-Health): the inclusion of equity criteria not captured by cost-effectiveness analysis. *Cost Eff Resour Alloc*. 2014;12:18-.
17. World Health Organization. It's time to walk the talk: WHO independent high-level commission on noncommunicable diseases final report. Geneva: World Health Organization; 2019. Licence: CC BY-NC-SA 3.0 IGO. 2019.
18. Ruhil R. The Changing Wealth of Nations 2018. Building a Sustainable Future. By Glenn-Marie Lange, Quentin Wodon and Kevin Carey; Washington DC: World Bank Group.© World Bank. IASSI-Quarterly. 2018;37(1):135-7.
19. Turin TC, Okamura T, Afzal AR, Rumana N, Watanabe M, Higashiyama A, et al. Hypertension and lifetime risk of stroke. *Journal of hypertension*. 2016;34(1):116-22.
20. Beyhaghi H, Viera A. Comparative Cost-Effectiveness of Clinic, Home, or Ambulatory Blood Pressure Measurement for Hypertension Diagnosis in US Adults: A Modeling Study. *Hypertension*. 2019;73(1):121-31.

21. Law M, Morris J, Wald N. Use of blood pressure lowering drugs in the prevention of cardiovascular disease: meta-analysis of 147 randomised trials in the context of expectations from prospective epidemiological studies. *Bmj*. 2009;338:b1665.
22. Kaptoge S, Pennells L, De Bacquer D, Cooney MT, Kavousi M, Stevens G, et al. World Health Organization cardiovascular disease risk charts: revised models to estimate risk in 21 global regions. *The Lancet Global Health*. 2019;7(10):e1332-e45.
23. Dawber TR. *The Framingham Study: the epidemiology of atherosclerotic disease*. Cambridge, MA: Harvard University Press; 1980.
24. Feinleib M, Kannel WB, Garrison RJ, McNamara PM, Castelli WP. The Framingham Offspring Study. Design and preliminary data. *Prev Med*. 1975;4(4):518-25.
25. Parish S, Collins R, Peto R, Youngman L, Barton J, Jayne K, et al. Cigarette smoking, tar yields, and non-fatal myocardial infarction: 14,000 cases and 32,000 controls in the United Kingdom. The International Studies of Infarct Survival (ISIS) Collaborators. *BMJ (Clinical research ed)*. 1995;311(7003):471-7.
26. Law MR, Morris JK, Wald NJ. Environmental tobacco smoke exposure and ischaemic heart disease: an evaluation of the evidence. *BMJ (Clinical research ed)*. 1997;315(7114):973-80.
27. Medical Expenditure Panel Survey. Medical Expenditure Panel Survey Public Use Files 1996-2001 [Available from: <http://www.meps.ahrq.gov/Puf/PufSearch.asp?SearchOption=Keyword>]
28. Huffman MD, Mohanan PP, Devarajan R, Baldrige AS, Kondal D, Zhao L, et al. Effect of a Quality Improvement Intervention on Clinical Outcomes in Patients in India With Acute Myocardial Infarction: The ACS QUIK Randomized Clinical Trial. *Jama*. 2018;319(6):567-78.
29. Witt BJ, Brown RD, Jr., Jacobsen SJ, Weston SA, Yawn BP, Roger VL. A community-based study of stroke incidence after myocardial infarction. *Annals of internal medicine*. 2005;143(11):785-92.
30. Yasui D, Asayama K, Ohkubo T, Kikuya M, Kanno A, Hara A, et al. Stroke Risk in Treated Hypertension Based on Home Blood Pressure: the Ohasama Study. *American Journal of Hypertension*. 2010;23(5):508-14.
31. Amarenco P, Bogousslavsky J, Callahan A, 3rd, Goldstein LB, Hennerici M, Rudolph AE, et al. High-dose atorvastatin after stroke or transient ischemic attack. *The New England journal of medicine*. 2006;355(6):549-59.
32. Appelros P, Gunnarsson KE, Terent A. Ten-year risk for myocardial infarction in patients with first-ever stroke: a community-based study. *Acta neurologica Scandinavica*. 2011;124(6):383-9.
33. Behar S, Tanne D, Abinader E, Agmon J, Barzilai J, Friedman Y, et al. Cerebrovascular accident complicating acute myocardial infarction: incidence, clinical significance and short- and long-term mortality rates. The SPRINT Study Group. *The American journal of medicine*. 1991;91(1):45-50.
34. Lakshminarayan K, Schissel C, Anderson DC, Vazquez G, Jacobs DR, Jr., Ezzeddine M, et al. Five-year rehospitalization outcomes in a cohort of patients with acute ischemic stroke: Medicare linkage study. *Stroke; a journal of cerebral circulation*. 2011;42(6):1556-62.
35. Prosser J, MacGregor L, Lees KR, Diener HC, Hacke W, Davis S. Predictors of early cardiac morbidity and mortality after ischemic stroke. *Stroke; a journal of cerebral circulation*. 2007;38(8):2295-302.
36. Touze E, Varenne O, Chatellier G, Peyrard S, Rothwell PM, Mas JL. Risk of myocardial infarction and vascular death after transient ischemic attack and ischemic stroke: a systematic review and meta-analysis. *Stroke; a journal of cerebral circulation*. 2005;36(12):2748-55.
37. Health MSf. *International Medical Products Price Guide: 2015 edition*. 2015.
38. Lee SE, Lee HY, Cho HJ, Choe WS, Kim H, Choi JO, et al. Clinical Characteristics and Outcome of Acute Heart Failure in Korea: Results from the Korean Acute Heart Failure Registry (KorAHF). *Korean circulation journal*. 2017;47(3):341-53.
39. Choi DJ, Han S, Jeon ES, Cho MC, Kim JJ, Yoo BS, et al. Characteristics, outcomes and predictors of long-term mortality for patients hospitalized for acute heart failure: a report from the Korean heart failure registry. *Korean circulation journal*. 2011;41(7):363-71.
40. Global, regional, and national age-sex-specific mortality for 282 causes of death in 195 countries and territories, 1980-2017: a systematic analysis for the Global Burden of Disease Study 2017. *Lancet (London, England)*. 2018;392(10159):1736-88.



41. Stenberg K, Lauer JA, Gkountouras G, Fitzpatrick C, Stanciole A. Econometric estimation of WHO-CHOICE country-specific costs for inpatient and outpatient health service delivery. *Cost Effectiveness and Resource Allocation*. 2018;16(1):11.
42. Health FMO. National strategic action plan (NSAP) for prevention & control of non-communicable diseases in Ethiopia, 2014-2016. 2014:43-7.
43. Mieraf Tadesse Tolla OFN, Solomon Tessema Memirie, Senbeta Guteta Abdisa, Awel Ababulgu, Degu Jerene, Melanie Bertram, Kirsten Strand, Stéphane Verguet and Kjell Arne Johansson. Prevention and treatment of cardiovascular disease in Ethiopia: cost-effectiveness analysis. *Cost Eff Resour Alloc* 2016;14(10).
44. Tan-Torres Edejer T, Acharya A, Adam Ta, Baltussen R, Evans DB, Hutubessy R, et al. Making choices in health: WHO guide to cost-effectiveness analysis. 2003.
45. Iftikhar A. Ethiopia Decent Work Check. Amsterdam: WageIndicator Foundation; 2019. p. 49.
46. Wang G, Zhang Z, Ayala C. Hospitalization Costs Associated With Hypertension as a Secondary Diagnosis Among Insured Patients Aged 18–64 Years. *American Journal of Hypertension*. 2010;23(3):275-81.
47. Kuriakose A, Nair Anish TS, Soman B, Varghese RT, Sreelal TP, Mendez AM, et al. Rate and Risk of All Cause Mortality among People with Known Hypertension in a Rural Community of Southern Kerala, India: The Results from the Prolife Cohort. *Int J Prev Med*. 2014;5(5):596-603.
48. Atlas. WD. Ethiopia - Crude death rate. 2020.
49. Kelemu Tilahun Kibret, Mesfin YM. Prevalence of hypertension in Ethiopia: a systematic meta-analysis. *Public Health Reviews* 2015;36(14).
50. WHO. Non-communicable diseases country profiles 2018. Geneva: World Health Organization. 2018.
51. Helelo TP GY, Adane AA. Prevalence and Associated Factors of Hypertension among Adults in Durame Town, Southern Ethiopia. *PLoS ONE*. 2014;9(11):e112790.
52. Shukuri A, Tewelde T, Shaweno T. Prevalence of old age hypertension and associated factors among older adults in rural Ethiopia. *Integrated blood pressure control*. 2019;12:23-31.
53. Zhou D, Xi B, Zhao M, Wang L, Veeranki SP. Uncontrolled hypertension increases risk of all-cause and cardiovascular disease mortality in US adults: the NHANES III Linked Mortality Study. *Sci Rep*. 2018;8(1):9418.
54. Najafi F, Karami-Matin B, Rezaei S, Khosravi A, Soofi M. Productivity costs and years of potential life lost associated with five leading causes of death: Evidence from Iran (2006-2010). *Med J Islam Repub Iran*. 2016;30:412-.
55. Noh J, Kim HC, Shin A, Yeom H, Jang S-Y, Lee JH, et al. Prevalence of Comorbidity among People with Hypertension: The Korea National Health and Nutrition Examination Survey 2007-2013. *Korean Circ J*. 2016;46(5):672-80.
56. Organization WH. WHO methods and data sources for global burden of disease estimates 2000-2016. *Global Health Estimates Technical Paper WHO/HIS/IER/GHE/20184*, WHO, Geneva. 2018.
57. Suchard MA, Schuemie MJ, Krumholz HM, You SC, Chen R, Pratt N, et al. Comprehensive comparative effectiveness and safety of first-line antihypertensive drug classes: a systematic, multinational, large-scale analysis. *Lancet*. 2019;394(10211):1816-26.
58. Law M, Wald N, Morris J, Jordan R. Value of low dose combination treatment with blood pressure lowering drugs: analysis of 354 randomised trials. *Bmj*. 2003;326(7404):1427.
59. Law MR, Morris JK, Wald NJ. Use of blood pressure lowering drugs in the prevention of cardiovascular disease: meta-analysis of 147 randomised trials in the context of expectations from prospective epidemiological studies. *BMJ (Clinical research ed)*. 2009;338:b1665.
60. Sorato MM, Davari M, Kebriaeezadeh A, Sarrafzadegan N, Shibru T, Fatemi B. Risk of fatal and nonfatal coronary heart disease and stroke events among adult patients with hypertension: basic Markov model inputs for evaluating cost-effectiveness of hypertension treatment: systematic review of cohort studies. *Journal of Pharmaceutical Health Services Research*. 2021;12(2).
61. Zawudie AB, Lemma TD, Daka DW. Cost of Hypertension Illness and Associated Factors Among Patients Attending Hospitals in Southwest Shewa Zone, Oromia Regional State, Ethiopia. *Clinicoecon Outcomes Res*. 2020;12:201-11.



- 1  
2  
3 62. Adane E, Atnafu A, Aschalew AY. The Cost of Illness of Hypertension and Associated Factors at the  
4 University of Gondar Comprehensive Specialized Hospital Northwest Ethiopia, 2018. Clinicoecon Outcomes  
5 Res [Internet]. 2020 2020; 12:[133-40 pp.]. Available from: <http://europepmc.org/abstract/MED/32184636>  
6  
7 <https://doi.org/10.2147/CEOR.S234674>  
8  
9 <https://europepmc.org/articles/PMC7064277>  
10  
11 <https://europepmc.org/articles/PMC7064277?pdf=render>.
- 12 63. Offei S. Economic Burden of Hypertension among Patients Attending Nsawam-Government Hospital  
13 in the Nsawam-Adoagyiri Municipality, Eastern Region, Ghana: University of Ghana; 2018.
- 14 64. Weaver CG, Clement FM, Campbell NRC, James MT, Klarenbach SW, Hemmelgarn BR, et al.  
15 Healthcare Costs Attributable to Hypertension. *Hypertension*. 2015;66(3):502-8.
- 16 65. Kirkland EB, Heincelman M, Bishu KG, Schumann SO, Schreiner A, Axon RN, et al. Trends in  
17 healthcare expenditures among US adults with hypertension: national estimates, 2003–2014. *Journal of the*  
18 *American Heart Association*. 2018;7(11):e008731.
- 19 66. Cohen JD. Hypertension epidemiology and economic burden: refining risk assessment to lower costs.  
20 *Managed care (Langhorne, Pa)*. 2009;18(10):51-8.
- 21 67. Adeniji F. Burden of out-of-pocket payments among patients with cardiovascular disease in public and  
22 private hospitals in Ibadan, South West, Nigeria: a cross-sectional study. *BMJ Open*. 2021;11(6):e044044-e.
- 23 68. Pogossova N. Costs associated with cardiovascular disease create a significant burden for society and  
24 they seem to be globally underestimated. *European Journal of Preventive Cardiology*. 2020;26(11):1147-9.
- 25 69. Le C, Zhankun S, Jun D, Keying Z. The economic burden of hypertension in rural south-west China.  
26 *Tropical Medicine & International Health*. 2012;17(12):1544-51.
- 27 70. Sorato MM, Davari M, Kebriaeezadeh A, Sarrafzadegan N, Shibru T, Fatemi B. Reasons for poor  
28 blood pressure control in Eastern Sub-Saharan Africa: looking into 4P's (primary care, professional, patient,  
29 and public health policy) for improving blood pressure control: a scoping review. *BMC Cardiovascular*  
30 *Disorders*. 2021;21(1):123.
- 31 71. Yoruk A, Boulous PK, Bisognano JD. The State of Hypertension in Sub-Saharan Africa: Review and  
32 Commentary. *American Journal of Hypertension*. 2017;31(4):387-8.
- 33 72. Gaziano TA, Bitton A, Anand S, Weinstein MC. The global cost of nonoptimal blood pressure. *Journal*  
34 *of hypertension*. 2009;27(7):1472-7.
- 35 73. Hird TR, Zomer E, Owen AJ, Magliano DJ, Liew D, Ademi Z. Productivity Burden of Hypertension  
36 in Australia: A Life Table Modeling Study. *Hypertension*. 2019;73(4):777-84.
- 37 74. Flack JM, Casciano R, Casciano J, Doyle J, Arikian S, Tang S, et al. Cardiovascular disease costs  
38 associated with uncontrolled hypertension. *Managed care interface*. 2002;15(11):28-36.  
39  
40  
41  
42  
43  
44  
45  
46  
47  
48  
49  
50  
51  
52  
53  
54  
55  
56  
57  
58  
59  
60

## Legends

## List of Figures

**Figure 1:** Micro-costing Bottom-up Approach for Healthcare costs. Adapted from Riewpaiboon A, et al. Cost analysis for efficient management: diabetes treatment at a public district hospital in Thailand.

**Figure 2:** Number of premature deaths and years of life lost (YLL) due to morbidity among adults with hypertension by sex, treatment and control status over productive life years simulated from life table modelling in Southern Ethiopia

For peer review only



Figure 1: Micro-costing Bottom-up Approach for Healthcare costs. Adapted from Riewpaiboon A, et al. Cost analysis for efficient management: diabetes treatment at a public district hospital in Thailand.

599x776mm (72 x 72 DPI)

1  
2  
3  
4  
5  
6  
7  
8  
9  
10  
11  
12  
13  
14  
15  
16  
17  
18  
19  
20  
21  
22  
23  
24  
25  
26  
27  
28  
29  
30  
31  
32  
33  
34  
35  
36  
37  
38  
39  
40  
41  
42  
43  
44  
45  
46  
47  
48  
49  
50  
51  
52  
53  
54  
55  
56  
57  
58  
59  
60



Figure 2: Number of premature deaths and years of life lost (YLL) due to morbidity among adults with hypertension by sex, treatment and control status over productive life years simulated from life table modelling in Southern Ethiopia

599x776mm (72 x 72 DPI)

**Supplementary materials:** Economic burden of hypertension at selected Hospitals in Southern Ethiopia; a patient level analysis

**Cardiovascular disease policy model**



**Supplementary Figure 1:** Cardiovascular disease policy model adapted for Sub-Saharan African perspective (1).

**Supplementary Table 1:** Age and sex specific distribution of Ethiopian population 2020 estimate, prevalence of hypertension and adult mortality rate

| Age structure                     | Male       | Female     | Total       | Estimated prevalence of hypertension | Mortality rate |         | Data Source |
|-----------------------------------|------------|------------|-------------|--------------------------------------|----------------|---------|-------------|
| <b>Prevalence of hypertension</b> |            |            |             |                                      | Men            | Women   | (2-8)       |
| 0-14 years                        | 21,657,152 | 21,381,628 | 43,038,780  | NA                                   | -              | -       |             |
| 15-19                             | 5,572,330  | 5,464,174  | 11,036,504  | 19.6                                 | 0.00286        | 0.00222 |             |
| 20-24                             | 5,930,683  | 5,816,173  | 11,746,856  | 19.6                                 | 0.00319        | 0.00223 |             |
| 25-29                             | 4,889,739  | 4,802,450  | 9,692,189   | 19.6                                 | 0.00293        | 0.00232 |             |
| 30-34                             | 3,761,349  | 3,757,544  | 7,518,893   | 23.0                                 | 0.00397        | 0.00368 |             |
| 35-39                             | 3,091,148  | 3,182,837  | 6,273,985   | 23.0                                 | 0.00411        | 0.00222 |             |
| 40-44                             | 2,445,523  | 2,488,422  | 4,933,945   | 25.9                                 | 0.00584        | 0.00385 |             |
| 45-49                             | 2,071,480  | 2,033,228  | 4,104,708   | 25.9                                 | 0.00360        | 0.00457 |             |
| 50-54                             | 1,567,789  | 1,660,957  | 3,228,746   | 41.9                                 | 0.00354        | 0.00274 |             |
| 55-59                             | 1,159,002  | 1,316,318  | 2,475,320   | 41.9                                 | 0.00354        | 0.00274 |             |
| 60-64                             | 946,594    | 1,109,670  | 2,056,264   | 41.9                                 | 0.00354        | 0.00274 |             |
| ≥ 65 years                        | 1,676,478  | 1,977,857  | 3,654,335   | 41.9                                 | 0.00354        | 0.00274 |             |
| Total                             | 54,769,267 | 54,991,258 | 109,760,525 |                                      |                |         |             |
|                                   |            |            |             | Prevalence of untreated hypertension |                |         |             |
| For all ages (15 +)               |            |            |             | 13.25                                |                |         | (9)         |

**Supplementary Table 2.** Model Parameters, Cohort Setting, and Probability of Transition between states and Disability weights for hypertension and related complications the Global Burden of Disease 2013 study and WHO Global Health Estimates

| Parameter                                                          | Data                                             | Source         |
|--------------------------------------------------------------------|--------------------------------------------------|----------------|
| Relative risk of hypertension treatment                            |                                                  |                |
| Relative risk of CHD event on hypertension treatment               | 0.683 (95% CI, 0.633–0.717)                      | (10-13)        |
| Relative risk of a cerebrovascular event on hypertension treatment | 0.633 (95% CI, 0.526–0.717)                      | (14)           |
| Relative risk of CHD event on normotensive men and women           | 0.49 (95% CI 0.458–0.513) and 0.32 (0.292–0.342) | (15)           |
| <b>Transition probabilities to death</b>                           |                                                  |                |
| <b>Health state</b>                                                | <b>Disability weight Estimate</b>                | <b>Source</b>  |
| <b>Hypertension</b>                                                |                                                  | <b>(16)</b>    |
| Treated                                                            | 0.246                                            |                |
| Untreated                                                          | 0.323                                            |                |
| Treated and controlled                                             | 0.171                                            |                |
| <b>Myocardial Infarction (MI)</b>                                  |                                                  | <b>(17)</b>    |
| Day 1-2                                                            | 0.432                                            |                |
| Days 3-28                                                          | 0.074                                            |                |
| <b>Angina Pectoris</b>                                             |                                                  |                |
| Mild                                                               | 0.033                                            |                |
| Moderate                                                           | 0.080                                            |                |
| Severe                                                             | 0.167                                            |                |
| <b>Heart failure</b>                                               |                                                  |                |
| Mild                                                               | 0.041                                            |                |
| Moderate                                                           | 0.072                                            |                |
| <b>Diabetes, digestive, and genitourinary disease</b>              |                                                  |                |
| <b>Diabetes</b>                                                    | 0.015 (0.012 - 0.018)                            | <b>(18-20)</b> |
| <b>Treated</b>                                                     | 0.033                                            |                |
| <b>Untreated</b>                                                   | 0.012                                            |                |

|                                                 |                     |
|-------------------------------------------------|---------------------|
| Diabetic neuropathy                             | 0.133               |
| Chronic kidney disease (stage IV)               | 0.104               |
| End-stage renal disease: with kidney transplant | 0.024               |
| End-stage renal disease: on dialysis            | 0.571               |
| Disutility due to daily medication              | 0.049 (0.031–0.072) |
| <b>Acute Events</b>                             |                     |
| Myocardial Infarction                           | 0.432 (0.288–0.579) |
| Stroke                                          | 0.570 (0.377–0.707) |
| Occurrence of second or later CVD event         | 0.985 (0.992–0.989) |
| <b>Chronic States</b>                           |                     |
| Ischemic Heart Disease                          | 0.08 (0.02–0.24)    |
| Stroke                                          | 0.135 (0.01–0.437)  |
| Alive post 2+ CVD Events                        | 0.242 (0.11–0.437)  |

CHD, coronary heart disease; SMR, standardized mortality ratio. \*Age and sex dependent †Applied multiplicatively to general population age- and sex-dependent utilities; CHD= Angina pectoris, coronary insufficiency, myocardial infarction, or coronary death.

**Supplementary table 3:** Simulation input parameters

| Input parameter                                              | Value                                                                                                                                                                                                             | Source                                                                                             |
|--------------------------------------------------------------|-------------------------------------------------------------------------------------------------------------------------------------------------------------------------------------------------------------------|----------------------------------------------------------------------------------------------------|
| Non-CVD death rate                                           | 0.005–0.176 (Age- and sex specific)#                                                                                                                                                                              | Calculated from WHO lifetables and GBD 2017 (21)                                                   |
| Probability of first-time cardiovascular disease (CVD) event | Individual risk characteristic specific                                                                                                                                                                           | Obtained from the Globorisk Office Calculator standardized for India [25]                          |
| <b>Acute CVD events</b>                                      |                                                                                                                                                                                                                   |                                                                                                    |
| MI                                                           |                                                                                                                                                                                                                   |                                                                                                    |
| Probability of MI if CVD event occurs                        | 37.6– 66.7% (Age- and sex specific)#                                                                                                                                                                              | Calculated based on GBD 2017(21)                                                                   |
| 30-day fatality                                              | 0.01–0.13 (Age- and sex-specific)#                                                                                                                                                                                | Calibrated based on findings of Huffman et al. 2018 (22)                                           |
| Re-infarction (in 30 days)                                   | 0.0120 (0.0099–0.0141)ψ                                                                                                                                                                                           | ACS QUIK Study by Huffman et al. 2018 (22)                                                         |
| Acute Stroke (in 30 days)                                    | 0.0060 (0.0045–0.0075)ψ                                                                                                                                                                                           | ACS QUIK Study by Huffman et al. 2018 (22)                                                         |
| Stroke                                                       |                                                                                                                                                                                                                   |                                                                                                    |
| Probability of Stroke if CVD event occurs                    | 33.2–62.3% (Age- and sex specific)#                                                                                                                                                                               | Calculated based on GBD 2017 (21) And Jushua D. Bundry et al(23)                                   |
| 30-day fatality                                              | 0.12, 0.13 (Sex-specific)#                                                                                                                                                                                        | Calibrated based on a multi-site study by Pandian and Sudhan 2013 [30]                             |
| Repeat Stroke (in 30 days)                                   | 0.15 (0.1–0.2)ψ                                                                                                                                                                                                   | Petty et al. 1998 (24)                                                                             |
| Sudden cardiac death                                         | 0.10 per 100 patient-years (95% CI, 0.07–0.14) in a cohort of 33 of 3242 untreated hypertensive patients without evidence of coronary or cerebrovascular HD at entry and followed up for an average of 10.3 years | Heart disease and stroke statistics 2021 update                                                    |
| <b>Heart failure</b>                                         |                                                                                                                                                                                                                   |                                                                                                    |
| Probability of AHF                                           |                                                                                                                                                                                                                   |                                                                                                    |
| 30-days fatality                                             | 0.0945                                                                                                                                                                                                            | Obtained from the THESUS-HF registry (25) and Korean Acute Heart Failure Registry (KorAHF)(26, 27) |



|                                                                         |                                            |                                                                                                                                                                                                                              |
|-------------------------------------------------------------------------|--------------------------------------------|------------------------------------------------------------------------------------------------------------------------------------------------------------------------------------------------------------------------------|
| Re-hospitalization                                                      | 0.0736                                     | Obtained from the THESUS-HF registry (25)                                                                                                                                                                                    |
| <b>Chronic events</b>                                                   |                                            |                                                                                                                                                                                                                              |
| Monthly risk of mortality                                               | 0.001–0.019 (Age- and sex-specific)#       | Calibrated based on GBD 2017 (21)                                                                                                                                                                                            |
| Reinfarction                                                            | 0.079 (0.073–0.085)ψ                       | Based on Steg et al. 2007 (28) and derived by Lin et al. 2019 (20)                                                                                                                                                           |
| Acute Stroke                                                            | 0.014 (0.012–0.016)ψ                       | Based on Steg et al. 2007 (28) and derived by Lin et al. 2019 (20)<br>Continue Or Stop post-Stroke Antihypertensives Collaborative Study (COSSACS) (29), BP reduction and secondary stroke prevention: systematic review(30) |
| <b>Stroke</b>                                                           |                                            |                                                                                                                                                                                                                              |
| Monthly risk of mortality                                               | 0.001–0.013 (Age- and sex specific)#       | Calibrated based on GBD 2017 (21)<br><br>Stroke Risk in Treated Hypertension Based on Home Blood Pressure: the Ohasama Study(31)                                                                                             |
| Acute MI                                                                | 0.043 (0.038–0.048)ψ                       | Based on Steg et al. 2007 (28) and derived by Lin et al. 2019 (20)                                                                                                                                                           |
| Acute Stroke                                                            | 0.037 (0.033–0.041)                        | Based on Steg et al. 2007 (28) and derived by Lin et al. 2019 (20)                                                                                                                                                           |
| Relative risk of fatality for an individual with two or more CVD events | 1.5                                        | Smolina et al. 2012 (32)                                                                                                                                                                                                     |
| <b>Heart failure</b>                                                    |                                            |                                                                                                                                                                                                                              |
| <b>Incidence</b>                                                        |                                            |                                                                                                                                                                                                                              |
| 1 year mortality                                                        |                                            |                                                                                                                                                                                                                              |
| Re-hospitalization                                                      |                                            | <b>Moita B.eta al. 2019(36) and (37)</b>                                                                                                                                                                                     |
| <b>Effect of antihypertensive medication</b>                            |                                            |                                                                                                                                                                                                                              |
| Medication protocol for an individual                                   | Initial SBP-specific#                      | Based on Ethiopian NCD control guideline                                                                                                                                                                                     |
| IHD relative risk due to medication                                     | 0.32–0.89 (Age- and initial SBP-specific)# | Based on findings by Law et al. 2009 (38) and Asayam Kei., 2017(39)                                                                                                                                                          |
| Stroke relative risk due to medication                                  | 0.20–0.89 (Age- and initial SBP-specific)# | Based on findings by Law et al. 2009(38)                                                                                                                                                                                     |
| IHD relative risk if partially adherent                                 | 0.66–0.95 (Age- and initial SBP-specific)  | Calculated based on a linear relationship between adherence and efficacy as considered by Cherry et al. 2009(40)                                                                                                             |
| Stroke relative risk if partially adherent                              | 0.60–0.95 (Age- and initial SBP-specific)  | Calculated based on a linear relationship between adherence and efficacy as considered by Cherry et al. 2009 (40) and Lisheng Liu, Zengwu Wang. et al(41)                                                                    |

**Supplementary Table 4:** Price of drugs, medical supplies, procedures and professional time used for management of hypertension in Southern Ethiopia, January, 2021

| List of medicines                                                                                        | Unit   | Price in 2021 Ethiopian birr |                          | Price USD                | Source                                                                                                                                                                      |
|----------------------------------------------------------------------------------------------------------|--------|------------------------------|--------------------------|--------------------------|-----------------------------------------------------------------------------------------------------------------------------------------------------------------------------|
|                                                                                                          |        | Wholesale price              | Retail price             | Retail Price in 2021 USD |                                                                                                                                                                             |
| Acetylsalicylic Acid - 81mg – Tablet (coated)                                                            | 10x10  | 43.72                        | 1.32                     | 1.303                    | Ethiopian<br>Pharmaceutica<br>l supply<br>agency, Arba<br>Minch Hub<br>wholesale<br>price 2021 and<br>Arba Minch<br>General<br>hospital<br>pharmacy<br>retail price<br>2021 |
| Adrenaline (Epinephrine)-0.1% in 1mL ampoule                                                             | Each   | 36.032                       | 1.09                     | 1.074                    |                                                                                                                                                                             |
| Amiodarone - 100mg – Tablet                                                                              | 10x3   | 313.34                       | 9.44                     | 9.337                    |                                                                                                                                                                             |
| Amlodipine - 10mg - Tablet                                                                               | 10x10  | 105.44                       | 3.18                     | 3.142                    |                                                                                                                                                                             |
| Amlodipine - 5mg – Tablet                                                                                | 10x10  | 75.26                        | 2.27                     | 2.243                    |                                                                                                                                                                             |
| Atenolol - 50mg – Tablet                                                                                 | 10x10  | 58.70                        | 1.77                     | 1.749                    |                                                                                                                                                                             |
| Atorvastatin - 20mg – Tablet                                                                             | 10x10  | 195.68                       | 5.89                     | 5.831                    |                                                                                                                                                                             |
| Atorvastatin - 40mg – Tablet                                                                             | 10x3   | 140.76                       | 4.24                     | 4.195                    |                                                                                                                                                                             |
| Beclomethasone Propionate -100mcg/dose – Aerosol                                                         | 200 MD | 131.85                       | 3.97                     | 3.929                    |                                                                                                                                                                             |
| Candesartan - 8mg – Tablet                                                                               | 14x2   | 152.63                       | 4.60                     | 4.548                    |                                                                                                                                                                             |
| Captopril - 12.5mg – Tablet                                                                              | 10x10  | 33.54                        | 1.01                     | 1.000                    |                                                                                                                                                                             |
| Captopril - 25mg – Tablet                                                                                | 10x10  | 26.91                        | 0.81                     | 0.802                    |                                                                                                                                                                             |
| Dexamethasone - 4mg/ml in 1ml Ampoule - Injection                                                        | 10     | 3.95                         | 0.12                     | 0.118                    |                                                                                                                                                                             |
| Captopril + HCT (50mg + 25mg)-Tablet                                                                     | 10x10  | 57.32                        | 1.73                     | 1.708                    |                                                                                                                                                                             |
| Digoxin - 0.25mg – Tablet                                                                                | 10x10  | 202.18                       | 6.09                     | 6.025                    |                                                                                                                                                                             |
| Enalapril Maleate - 10mg - Tablet                                                                        | 10x10  | 61.57                        | 1.85                     | 1.835                    |                                                                                                                                                                             |
| Enalapril Maleate - 5mg – Tablet                                                                         | 10x10  | 63.92                        | 1.93                     | 1.905                    |                                                                                                                                                                             |
| Enalapril Maleate – 2.5mg – Tablet                                                                       | 10x10  | 19.98                        | 0.60                     | 0.595                    |                                                                                                                                                                             |
| Enalapril Maleate +HCT (10 mg + 25 mg)-tablet                                                            | 10x10  | 78.22                        | 2.36                     | 2.331                    |                                                                                                                                                                             |
| Glibenclamide - 5mg – Tablet                                                                             | 10x10  | 39.09                        | 1.18                     | 1.165                    |                                                                                                                                                                             |
| Glucose 40% in 20 mL – IV infusion                                                                       | Each   | 2.54                         | 0.08                     | 0.076                    |                                                                                                                                                                             |
| Glyceryl Trinitrate - 0.4mg – Tablet (Sublingual)                                                        | 100    | 487.21                       | 14.67                    | 14.518                   |                                                                                                                                                                             |
| Hydralazine - 20mg/ml in 1ml ampoule - Injection                                                         | 5      | 204.01                       | 6.14                     | 6.079                    |                                                                                                                                                                             |
| Hydrochlorothiazide - 25mg – Tablet                                                                      | 25x4   | 48.05                        | 1.45                     | 1.432                    |                                                                                                                                                                             |
| Insulin Isophane Biphasic (Soluble/Isophane Mixture)- (30 + 70)IU/ml in 10ml Vial -Injection(Suspension) | Each   | 85.20                        | 2.57                     | 2.539                    |                                                                                                                                                                             |
| Insulin Isophane Human - 100IU/ml in 10ml Vial - Injection(Suspension)                                   | Each   | 100.28                       | 3.02                     | 2.988                    |                                                                                                                                                                             |
| Insulin Soluble Human - 100IU/ml in 10ml Vial                                                            | Each   | 106.21                       | 3.20                     | 3.165                    |                                                                                                                                                                             |
| Lovastatin - 20mg – Tablet                                                                               | 10x10  | 84.59                        | 2.55                     | 2.521                    |                                                                                                                                                                             |
| Metformin - 500mg – Tablet                                                                               | 10     | 27.78                        | 0.84                     | 0.828                    |                                                                                                                                                                             |
| Methyldopa - 250mg – Tablet                                                                              | 100x10 | 51.75                        | 1.56                     | 1.542                    |                                                                                                                                                                             |
| Metoprolol - 50mg – Tablet                                                                               | 10x10  | 94.43                        | 2.84                     | 2.814                    |                                                                                                                                                                             |
| Morphine sulphate-30mg-tablet                                                                            | 110    | 410.71                       | 12.37                    | 12.239                   |                                                                                                                                                                             |
| Nifedipine - 20mg – Tablet                                                                               | 10x10  | 58.70                        | 1.77                     | 1.749                    |                                                                                                                                                                             |
| Prednisolone - 5 mg – Tablet                                                                             | 100x10 | 342.23                       | 10.31                    | 10.198                   |                                                                                                                                                                             |
| Propranolol - 40mg – Tablet                                                                              | 10x10  | 67.54                        | 2.03                     | 2.013                    |                                                                                                                                                                             |
| Propylthiouracil - 100mg - Tablet (Scored)                                                               | 100    | 633.87                       | 19.09                    | 18.889                   |                                                                                                                                                                             |
| Salbutamol - 0.1mg/dose - Aerosol (Oral Inhalation)                                                      | 200 MD | 117.20                       | 3.53                     | 3.492                    |                                                                                                                                                                             |
| Spironolactone - 25mg – Tablet                                                                           | 10x10  | 81.87                        | 2.47                     | 2.440                    |                                                                                                                                                                             |
| Thyroxin Sodium - 0.1mg – Tablet                                                                         | 100    | 178.49                       | 5.38                     | 5.319                    |                                                                                                                                                                             |
| Valsartan + HCT (80mg +12.5mg)                                                                           | 7*2    | 38.47                        | 1.16                     | 1.146                    |                                                                                                                                                                             |
| <b>Laboratory and imaging costs</b>                                                                      |        | <b>Price per test ETB</b>    | <b>Price in 2021 USD</b> |                          |                                                                                                                                                                             |
| CBC                                                                                                      |        | 75.00                        |                          | 1.72                     | Arba Minch<br>General<br>Hospital<br>Laboratory<br>service price<br>2021                                                                                                    |
| FBG/RBS                                                                                                  |        | 20.00                        |                          | 0.46                     |                                                                                                                                                                             |
| Lipid profile (LDL, HDL, Total cholesterol, Triglyceride)                                                |        | 160.00                       |                          | 3.68                     |                                                                                                                                                                             |
| ECG                                                                                                      |        | 120.00                       |                          | 2.76                     |                                                                                                                                                                             |
| ECO                                                                                                      |        | 350.00                       |                          | 8.05                     |                                                                                                                                                                             |
| CT-scan                                                                                                  |        | 1200                         |                          | 27.59                    |                                                                                                                                                                             |
| RFT (bilirubin, creatinine)                                                                              |        | 80.00                        |                          | 1.84                     |                                                                                                                                                                             |
| Chest-ray                                                                                                |        | 726                          |                          | 16.69                    |                                                                                                                                                                             |
| Urine analysis                                                                                           |        | 15.00                        |                          | 0.34                     |                                                                                                                                                                             |
| Body fluid analysis                                                                                      |        | 100.00                       |                          | 2.30                     |                                                                                                                                                                             |
| H. pylori                                                                                                |        | 50.00                        |                          | 1.15                     |                                                                                                                                                                             |

|                                                                                     |                                                                 |                                                                                                                                             |                                  |
|-------------------------------------------------------------------------------------|-----------------------------------------------------------------|---------------------------------------------------------------------------------------------------------------------------------------------|----------------------------------|
| Liver function test (AST, ALT, ALP)                                                 | 120.00                                                          | 2.76                                                                                                                                        |                                  |
| Thyroid function test (T3, T4, TSH)                                                 | 432.00                                                          | 9.93                                                                                                                                        |                                  |
| <b>Hospital bed days</b>                                                            |                                                                 |                                                                                                                                             |                                  |
| Primary hospital                                                                    | 52.52                                                           | 1.21                                                                                                                                        | WHO Choice (42) inflated to 2021 |
| Secondary hospital                                                                  | 54.76                                                           | 1.26                                                                                                                                        |                                  |
| Tertiary hospital                                                                   | 70.81                                                           | 1.63                                                                                                                                        |                                  |
| <b>Health facility visit</b>                                                        |                                                                 | 0.00                                                                                                                                        |                                  |
| Primary hospital                                                                    | 18.58                                                           | 0.43                                                                                                                                        |                                  |
| Secondary hospital                                                                  | 21.17                                                           | 0.49                                                                                                                                        |                                  |
| Tertiary hospital                                                                   | 22.06                                                           | 0.51                                                                                                                                        |                                  |
| Health center visit                                                                 | 23.00                                                           | 0.53                                                                                                                                        |                                  |
| PCI intervention                                                                    | 63,000.00                                                       | 1448.28                                                                                                                                     |                                  |
| In-patient costs for MI                                                             | 45240.00                                                        | 1040.00                                                                                                                                     |                                  |
| In-patient costs for Stroke                                                         | 40890.00                                                        | 940.00                                                                                                                                      |                                  |
| Outpatient cost for IHD (per annum)                                                 | 1957.50                                                         | 45.00                                                                                                                                       |                                  |
| Outpatient cost for Stroke (per annum)                                              | 2914.50                                                         | 67.00                                                                                                                                       |                                  |
| <b>Salary scale of human resource</b>                                               |                                                                 | 0.00                                                                                                                                        |                                  |
| Physician                                                                           | 21,100.00                                                       | 485.06                                                                                                                                      | MOH, Ethiopia 2012/2019 (43).    |
| Acute care nurse                                                                    | 7470.00                                                         | 171.72                                                                                                                                      |                                  |
| Pharmacy personnel                                                                  | 8047.00                                                         | 184.99                                                                                                                                      |                                  |
| Laboratory technician                                                               | 6460.00                                                         | 148.51                                                                                                                                      |                                  |
| Program cost per person per annum                                                   | 993.29                                                          | 22.83                                                                                                                                       |                                  |
| <b>Antihypertensive treatment</b>                                                   |                                                                 |                                                                                                                                             |                                  |
| Antihypertensive medication (per individual per annum)                              | Drug costs based on national Drug supply agency wholesale price |                                                                                                                                             |                                  |
| Out-patient consultations (per visit)                                               | \$43.36                                                         | Annual outpatient visit cost (12*WHO cost per outpatient visit inflated to 2021) WHO Choice (42)                                            |                                  |
| One-time diagnostic tests                                                           |                                                                 | Based on Laboratory procedures and test price of Arba Minch General Hospital, 2021                                                          |                                  |
| In-patient costs for MI                                                             | \$1040                                                          | WHO Choice (42) inflated to 2021                                                                                                            |                                  |
| In-patient costs for Stroke                                                         | \$940                                                           |                                                                                                                                             |                                  |
| <b>Chronic CVD care</b>                                                             |                                                                 |                                                                                                                                             |                                  |
| Secondary care medication in public sector (per individual per annum)               | \$92, \$184 (Dosage-specific)§                                  | MSH-2015 International Drug Price Indicator inflated to 2021(25)                                                                            |                                  |
| Outpatient cost for IHD (per annum)                                                 | \$45                                                            | WHO Choice (44) inflated to 2021                                                                                                            |                                  |
| Outpatient cost for Stroke (per annum)                                              | \$67                                                            |                                                                                                                                             |                                  |
| Average inflation rate Ethiopia                                                     | 16.58%                                                          | <a href="https://take-profit.org/en/statistics/inflation-rate/ethiopia/">https://take-profit.org/en/statistics/inflation-rate/ethiopia/</a> |                                  |
| Average inflation rate foreign                                                      | 2.02%                                                           |                                                                                                                                             |                                  |
| Percentage change                                                                   | 24.6%                                                           |                                                                                                                                             |                                  |
| Exchange rate July 2021 (1USD)                                                      | 43.5 ETB                                                        |                                                                                                                                             |                                  |
| 1USD = 20.999 ETB in 2016 and 43.5 in 2021; PPP= 12.1/8.1 = 1.5                     |                                                                 |                                                                                                                                             |                                  |
| MD: metered Dose; MOH: Ministry of Health 1 USD = 43.5 January 2021                 |                                                                 |                                                                                                                                             |                                  |
| <b>Note:</b> 30% mark-up at regional EPSA hub, 31% mark-up at Public Hospital level |                                                                 |                                                                                                                                             |                                  |

**Supplementary Table 5:** Risk of death across age and gender covariate categories stratified for hypertension

| Variables                         | Categories           | Incidence of death (%) |                | Relative risk in each category (CI) | Source |
|-----------------------------------|----------------------|------------------------|----------------|-------------------------------------|--------|
|                                   |                      | High BP group          | Normal         |                                     |        |
| Age                               | 20-29                | 1.68%                  | 0.54%          | 3.11 (1.16-8.36)                    | (8)    |
|                                   | 30-39                | 1.71%                  | 0.94%          | 1.82 (1.04-3.19)                    |        |
|                                   | 40-49                | 2.43%                  | 1.88%          | 1.29 (0.91-1.82)                    |        |
|                                   | 50-59                | 6.30%                  | 4.03%          | 1.56 (1.28-1.91)                    |        |
|                                   | 60 and above         | 19.32%                 | 15.9%          | 1.21 (1.12-1.31)                    |        |
| Gender                            | Women                | 8.71%                  | 1.1%           | 3.31 (2.98-3.68)                    |        |
|                                   | Men                  | 15.47%                 | 4.62%          | 3.34(3.02-3.70)                     |        |
| <b>Risk of all case mortality</b> |                      |                        |                |                                     |        |
| Gender                            | Treatment status     | < 60 years             | > 60 years     | HR (95% CI)                         | (45)   |
| Men                               | Normal               | <b>0.0068</b>          | <b>0.0214</b>  | 1.00 (Reference)                    |        |
|                                   | Treated controlled   | <b>0.0188</b>          | <b>0.0305</b>  | 1.20 (0.92-1.57)                    |        |
|                                   | Treated uncontrolled | <b>0.0252</b>          | <b>0.0372</b>  | 1.55 (1.19-2.01)                    |        |
|                                   | Untreated            | <b>0.0197</b>          | <b>0.0336</b>  | 1.45 (1.23-1.72)                    |        |
| Women                             | Normal               | <b>0.00528</b>         | <b>0.01870</b> | 1.00 (Reference)                    |        |
|                                   | Treated controlled   | <b>0.01675</b>         | <b>0.02841</b> | 1.11 (0.84-1.47)                    |        |
|                                   | Treated uncontrolled | <b>0.02533</b>         | <b>0.03736</b> | 1.63 (1.34-1.99)                    |        |
|                                   | Untreated            | <b>0.02075</b>         | <b>0.03471</b> | 1.31 (1.06-1.61)                    |        |

**Supplementary Table 6:** Annual mortality rate in the total population, those with hypertension by treatment and control status and those without hypertension in Ethiopia in 2021 by age group and sex based on literature review of systematic reviews and clinical trials

| Age group    | Mortality rate in the total population | Mortality rate among people without hypertension | Mortality rate among people with treated and controlled hypertension | Mortality rate among people with treated but uncontrolled hypertension | Mortality rate among people with untreated hypertension | References                                                                      |
|--------------|----------------------------------------|--------------------------------------------------|----------------------------------------------------------------------|------------------------------------------------------------------------|---------------------------------------------------------|---------------------------------------------------------------------------------|
| <b>Women</b> |                                        |                                                  |                                                                      |                                                                        |                                                         |                                                                                 |
| 15-19        | 0.00222                                | 0.00222                                          | 0.016746                                                             | 0.025                                                                  | 0.02075                                                 | Ko, Min Jung, et al. 2016 (46), Mende Sorato, et al, 2021. (1, 23, 45, 47, 48). |
| 20-24        | 0.00223                                | 0.00223                                          | 0.016746                                                             | 0.025                                                                  | 0.02075                                                 |                                                                                 |
| 25-29        | 0.00232                                | 0.00232                                          | 0.016746                                                             | 0.025                                                                  | 0.02075                                                 |                                                                                 |
| 30-34        | 0.00368                                | 0.00368                                          | 0.016746                                                             | 0.025                                                                  | 0.02075                                                 |                                                                                 |
| 35-39        | 0.00222                                | 0.00222                                          | 0.016746                                                             | 0.025                                                                  | 0.02075                                                 |                                                                                 |
| 40-44        | 0.00385                                | 0.00385                                          | 0.016746                                                             | 0.025                                                                  | 0.02075                                                 |                                                                                 |
| 45-49        | 0.00457                                | 0.00457                                          | 0.016746                                                             | 0.025                                                                  | 0.02075                                                 |                                                                                 |
| 50-54        | 0.00182                                | 0.00182                                          | 0.016746                                                             | 0.025                                                                  | 0.02075                                                 |                                                                                 |
| 55-59        | 0.00182                                | 0.00182                                          | 0.016746                                                             | 0.025                                                                  | 0.02075                                                 |                                                                                 |
| 60 -64       | 0.00441                                | 0.00441                                          | 0.028414                                                             | 0.037                                                                  | 0.03471                                                 |                                                                                 |
| <b>Men</b>   |                                        |                                                  |                                                                      |                                                                        |                                                         |                                                                                 |
| 15-19        | 0.00286                                | 0.00286                                          | 0.018783                                                             | 0.025                                                                  | 0.01969                                                 | Kuriakose A. et al. 2014. (8), EDHS, 2016 (7, 45, 47-50)                        |
| 20-24        | 0.00319                                | 0.00319                                          | 0.018783                                                             | 0.025                                                                  | 0.01969                                                 |                                                                                 |
| 25-29        | 0.00293                                | 0.00293                                          | 0.018783                                                             | 0.025                                                                  | 0.01969                                                 |                                                                                 |
| 30-34        | 0.00397                                | 0.00397                                          | 0.018783                                                             | 0.025                                                                  | 0.01969                                                 |                                                                                 |
| 35-39        | 0.00411                                | 0.00411                                          | 0.018783                                                             | 0.025                                                                  | 0.01969                                                 |                                                                                 |
| 40-44        | 0.00584                                | 0.00584                                          | 0.018783                                                             | 0.025                                                                  | 0.01969                                                 |                                                                                 |
| 45-49        | 0.0036                                 | 0.0036                                           | 0.018783                                                             | 0.025                                                                  | 0.01969                                                 |                                                                                 |
| 50-54        | 0.00354                                | 0.00354                                          | 0.018783                                                             | 0.025                                                                  | 0.01969                                                 |                                                                                 |
| 55-59        | 0.00354                                | 0.00354                                          | 0.018783                                                             | 0.025                                                                  | 0.01969                                                 |                                                                                 |
| 60-64        | 0.00354                                | 0.00354                                          | 0.030451                                                             | 0.037                                                                  | 0.03365                                                 |                                                                                 |

## References

1. Sorato MM, Davari M, Kebriaeezadeh A, Sarrafzadegan N, Shibru T, Fatemi B. Risk of fatal and nonfatal coronary heart disease and stroke events among adult patients with hypertension: basic Markov model inputs for evaluating cost-effectiveness of hypertension treatment: systematic review of cohort studies. *Journal of Pharmaceutical Health Services Research*. 2021;12(2).
2. Institute. EPH. Ethiopia steps report on risk factors for chronic non-communicable diseases and prevalence of selected NCDs. 2016.
3. Kelemu Tilahun Kibret, Mesfin YM. Prevalence of hypertension in Ethiopia: a systematic meta-analysis. *Public Health Reviews* 2015;36(14).
4. WHO. Non-communicable diseases country profiles 2018. Geneva: World Health Organization. 2018.
5. Helelo TP GY, Adane AA. Prevalence and Associated Factors of Hypertension among Adults in Durame Town, Southern Ethiopia. *PLoS ONE*. 2014;9(11):e112790.
6. Shukuri A, Tewelde T, Shaweno T. Prevalence of old age hypertension and associated factors among older adults in rural Ethiopia. *Integrated blood pressure control*. 2019;12:23-31.
7. ICF C. Ethiopia Demographic and Health Survey 2016, Addis Ababa, Ethiopia, and Rockville, Maryland, USA: CSA and ICF. DF-1.6.
8. Kuriakose A, Nair Anish TS, Soman B, Varghese RT, Sreelal TP, Mendez AM, et al. Rate and Risk of All Cause Mortality among People with Known Hypertension in a Rural Community of Southern Kerala, India: The Results from the Prolife Cohort. *Int J Prev Med*. 2014;5(5):596-603.
9. Getachew F DA, Solomon D. Prevalence of Undiagnosed Hypertension and Associated Factors among Residents in Gulele Sub-City, Addis Ababa, Ethiopia. *J Community Med Health Educ*. 2018;8(590).
10. Antikainen R, Jousilahti P, Tuomilehto J. Systolic blood pressure, isolated systolic hypertension and risk of coronary heart disease, strokes, cardiovascular disease and all-cause mortality in the middle-aged population. *Journal of hypertension*. 1998;16(5):577-83.
11. Ford ES, Giles WH, Mokdad AH. The distribution of 10-year risk for coronary heart disease among US adults: findings from the National Health and Nutrition Examination Survey III. *Journal of the American College of Cardiology*. 2004;43(10):1791-6.
12. Collaborators GRF. Global, regional, and national comparative risk assessment of 84 behavioural, environmental and occupational, and metabolic risks or clusters of risks for 195 countries and territories, 1990–2017: a systematic analysis for the Global Burden of Disease Study 2017. *Lancet (London, England)*. 2018;392(10159):1923.
13. Flint AC, Conell C, Ren X, Banki NM, Chan SL, Rao VA, et al. Effect of systolic and diastolic blood pressure on cardiovascular outcomes. *New England Journal of Medicine*. 2019;381(3):243-51.
14. Rapsomaniki E, Timmis A, George J, Pujades-Rodriguez M, Shah AD, Denaxas S, et al. Blood pressure and incidence of twelve cardiovascular diseases: lifetime risks, healthy life-years lost, and age-specific associations in 1·25 million people. *The Lancet*. 2014;383(9932):1899-911.
15. Lloyd-Jones DM, Larson MG, Beiser A, Levy D. Lifetime risk of developing coronary heart disease. *The Lancet*. 1999;353(9147):89-92.
16. Organization WH. Disability weights, discounting and age weighting of DALYs. Available; 2016.
17. Salomon JA, Haagsma JA, Davis A, de Noordhout CM, Polinder S, Havelaar AH, et al. Disability weights for the Global Burden of Disease 2013 study. *The Lancet Global Health*. 2015;3(11):e712-e23.
18. Vos T, Allen C, Arora M, Barber RM, Bhutta ZA, Brown A, et al. Global, regional, and national incidence, prevalence, and years lived with disability for 310 diseases and injuries, 1990–2015: a systematic analysis for the Global Burden of Disease Study 2015. *The Lancet*. 2016;388(10053):1545-602.
19. Salomon JA, Vos T, Hogan DR, Gagnon M, Naghavi M, Mokdad A, et al. Common values in assessing health outcomes from disease and injury: disability weights measurement study for the Global Burden of Disease Study 2010. *Lancet (London, England)*. 2012;380(9859):2129-43.
20. Lin JK, Moran AE, Bibbins-Domingo K, Falase B, Pedroza Tobias A, Mandke CN, et al. Cost-effectiveness of a fixed-dose combination pill for secondary prevention of cardiovascular disease in China, India, Mexico, Nigeria, and South Africa: a modelling study. *The Lancet Global health*. 2019;7(10):e1346-e58.



21. Global, regional, and national age-sex-specific mortality for 282 causes of death in 195 countries and territories, 1980-2017: a systematic analysis for the Global Burden of Disease Study 2017. *Lancet* (London, England). 2018;392(10159):1736-88.
22. Huffman MD, Mohanan PP, Devarajan R, Baldrige AS, Kondal D, Zhao L, et al. Effect of a Quality Improvement Intervention on Clinical Outcomes in Patients in India With Acute Myocardial Infarction: The ACS QUIK Randomized Clinical Trial. *Jama*. 2018;319(6):567-78.
23. Bundy JD, Li C, Stuchlik P, Bu X, Kelly TN, Mills KT, et al. Systolic Blood Pressure Reduction and Risk of Cardiovascular Disease and Mortality: A Systematic Review and Network Meta-analysis. *JAMA Cardiology*. 2017;2(7):775-81.
24. Petty GW, Brown RD, Jr., Whisnant JP, Sicks JD, O'Fallon WM, Wiebers DO. Survival and recurrence after first cerebral infarction: a population-based study in Rochester, Minnesota, 1975 through 1989. *Neurology*. 1998;50(1):208-16.
25. Health MSf. International Medical Products Price Guide: 2015 edition. 2015.
26. Lee SE, Lee HY, Cho HJ, Choe WS, Kim H, Choi JO, et al. Clinical Characteristics and Outcome of Acute Heart Failure in Korea: Results from the Korean Acute Heart Failure Registry (KorAHF). *Korean circulation journal*. 2017;47(3):341-53.
27. Choi DJ, Han S, Jeon ES, Cho MC, Kim JJ, Yoo BS, et al. Characteristics, outcomes and predictors of long-term mortality for patients hospitalized for acute heart failure: a report from the Korean heart failure registry. *Korean circulation journal*. 2011;41(7):363-71.
28. Steg PG, Bhatt DL, Wilson PWF, D'Agostino R, Ohman EM, Röther J, et al. One-Year Cardiovascular Event Rates in Outpatients With Atherothrombosis. *Jama*. 2007;297(11):1197-206.
29. Robinson TG, Potter JF, Ford GA, Bulpitt CJ, Chernova J, Jagger C, et al. Effects of antihypertensive treatment after acute stroke in the Continue Or Stop post-Stroke Antihypertensives Collaborative Study (COSSACS): a prospective, randomised, open, blinded-endpoint trial. *The Lancet Neurology*. 2010;9(8):767-75.
30. Katsanos AH, Filippatou A, Manios E, Deffereos S, Parissis J, Frogoudaki A, et al. Blood Pressure Reduction and Secondary Stroke Prevention. *Hypertension*. 2017;69(1):171-9.
31. Yasui D, Asayama K, Ohkubo T, Kikuya M, Kanno A, Hara A, et al. Stroke Risk in Treated Hypertension Based on Home Blood Pressure: the Ohasama Study. *American Journal of Hypertension*. 2010;23(5):508-14.
32. Smolina K, Wright FL, Rayner M, Goldacre MJ. Long-Term Survival and Recurrence After Acute Myocardial Infarction in England, 2004 to 2010. *Circulation: Cardiovascular Quality and Outcomes*. 2012;5(4):532-40.
33. Butler J, Kalogeropoulos AP, Georgiopoulou VV, Bibbins-Domingo K, Najjar SS, Sutton-Tyrrell KC, et al. Systolic blood pressure and incident heart failure in the elderly. The Cardiovascular Health Study and the Health, Ageing and Body Composition Study. *Heart*. 2011;97(16):1304.
34. Piller LB, Baraniuk S, Simpson LM, Cushman WC, Massie BM, Einhorn PT, et al. Long-term follow-up of participants with heart failure in the antihypertensive and lipid-lowering treatment to prevent heart attack trial (ALLHAT). *Circulation*. 2011;124(17):1811-8.
35. Davis BR, Kostis JB, Simpson LM, Black HR, Cushman WC, Einhorn PT, et al. Heart Failure With Preserved and Reduced Left Ventricular Ejection Fraction in the Antihypertensive and Lipid-Lowering Treatment to Prevent Heart Attack Trial. *Circulation*. 2008;118(22):2259-67.
36. Moita B, Marques AP, Camacho AM, Leão Neves P, Santana R. One-year rehospitalisations for congestive heart failure in Portuguese NHS hospitals: a multilevel approach on patterns of use and contributing factors. *BMJ open*. 2019;9(9):e031346.
37. Chamberlain AM, Dunlay SM, Gerber Y, Manemann SM, Jiang R, Weston SA, et al. Burden and Timing of Hospitalizations in Heart Failure: A Community Study. *Mayo Clinic proceedings*. 2017;92(2):184-92.
38. Law MR, Morris JK, Wald NJ. Use of blood pressure lowering drugs in the prevention of cardiovascular disease: meta-analysis of 147 randomised trials in the context of expectations from prospective epidemiological studies. *BMJ (Clinical research ed)*. 2009;338:b1665.
39. Asayama K. Observational study and participant-level meta-analysis on antihypertensive drug treatment-related cardiovascular risk. *Hypertension Research*. 2017;40(10):856-60.



- 1  
2  
3 40. Cherry SB, Benner JS, Hussein MA, Tang SSK, Nichol MB. The Clinical and Economic Burden of  
4 Nonadherence with Antihypertensive and Lipid-Lowering Therapy in Hypertensive Patients. *Value in Health*.  
5 2009;12(4):489-97.
- 6 41. Liu L, Wang Z, Gong L, Zhang Y, Thijs L, Staessen JA, et al. Blood pressure reduction for the  
7 secondary prevention of stroke: a Chinese trial and a systematic review of the literature. *Hypertension Research*.  
8 2009;32(11):1032-40.
- 9 42. Stenberg K, Lauer JA, Gkoutouras G, Fitzpatrick C, Stanciole A. Econometric estimation of WHO-  
10 CHOICE country-specific costs for inpatient and outpatient health service delivery. *Cost Effectiveness and*  
11 *Resource Allocation*. 2018;16(1):11.
- 12 43. Health FMO. National strategic action plan (NSAP) for prevention & control of non-communicable  
13 diseases in Ethiopia, 2014-2016. 2014:43-7.
- 14 44. Organization WH. WHO-CHOICE Estimates of Cost for Inpatient and Outpatient Health Service  
15 Delivery.
- 16 45. Zhou D, Xi B, Zhao M, Wang L, Veeranki SP. Uncontrolled hypertension increases risk of all-cause  
17 and cardiovascular disease mortality in US adults: the NHANES III Linked Mortality Study. *Sci Rep*.  
18 2018;8(1):9418.
- 19 46. Ko MJ, Jo AJ, Park CM, Kim HJ, Kim YJ, Park D-W. Level of blood pressure control and  
20 cardiovascular events: SPRINT criteria versus the 2014 hypertension recommendations. *Journal of the*  
21 *American College of Cardiology*. 2016;67(24):2821-31.
- 22 47. Gu Q, Dillon CF, Burt VL, Gillum RF. Association of Hypertension Treatment and Control With All-  
23 Cause and Cardiovascular Disease Mortality Among US Adults With Hypertension. *American Journal of*  
24 *Hypertension*. 2010;23(1):38-45.
- 25 48. Murakami Y, Hozawa A, Okamura T, Ueshima H. Relation of Blood Pressure and All-Cause Mortality  
26 in 180 000 Japanese Participants. *Hypertension*. 2008;51(6):1483-91.
- 27 49. Nagai K, Yamagata K, Iseki K, Moriyama T, Tsuruya K, Fujimoto S, et al. Antihypertensive treatment  
28 and risk of cardiovascular mortality in patients with chronic kidney disease diagnosed based on the presence of  
29 proteinuria and renal function: A large longitudinal study in Japan. *PLoS One*. 2019;14(12):e0225812.
- 30 50. Gudmundsson LS, Johannsson M, Thorgeirsson G, Sigfusson N, Sigvaldason H, Wittelman JCM. Risk  
31 profiles and prognosis of treated and untreated hypertensive men and women in a population-based  
32 longitudinal study The Reykjavik Study. *Journal of Human Hypertension*. 2004;18(9):615-22.
- 33  
34  
35  
36  
37  
38  
39  
40  
41  
42  
43  
44  
45  
46  
47  
48  
49  
50  
51  
52  
53  
54  
55  
56  
57  
58  
59  
60

# Reporting checklist for economic evaluation of health interventions.

Based on the CHEERS guidelines.

## Instructions to authors

Complete this checklist by entering the page numbers from your manuscript where readers will find each of the items listed below.

Your article may not currently address all the items on the checklist. Please modify your text to include the missing information. If you are certain that an item does not apply, please write "n/a" and provide a short explanation.

Upload your completed checklist as an extra file when you submit to a journal.

In your methods section, say that you used the CHEERS reporting guidelines, and cite them as:

Husereau D, Drummond M, Petrou S, Carswell C, Moher D, Greenberg D, Augustovski F, Briggs AH, Mauskopf J, Loder E. Consolidated Health Economic Evaluation Reporting Standards (CHEERS) statement.

| Title | Reporting Item                                                                                                                                                                    | Page Number |
|-------|-----------------------------------------------------------------------------------------------------------------------------------------------------------------------------------|-------------|
|       | <p><a href="#">#1</a> Identify the study as an economic evaluation or use more specific terms such as “cost-effectiveness analysis”, and describe the interventions compared.</p> | 1           |

## Abstract

[#2](#) Provide a structured summary of objectives, perspective, setting, methods (including study design and inputs), results (including base case and uncertainty analyses), and conclusions

## Introduction

[#3](#) Provide an explicit statement of the broader context for the study. Present the study question and its relevance for health policy or practice decisions

## Methods

[#4](#) Describe characteristics of the base case population and subgroups analysed, including why they were chosen.

[#5](#) State relevant aspects of the system(s) in which the decision(s) need(s) to be made.

[#6](#) Describe the perspective of the study and relate this to the costs being evaluated.

[#7](#) Describe the interventions or strategies being compared and state why they were chosen.

|    |                        |                     |                                                      |     |
|----|------------------------|---------------------|------------------------------------------------------|-----|
| 1  | Time horizon           | <a href="#">#8</a>  | State the time horizon(s) over which costs and       | 2   |
| 2  |                        |                     |                                                      |     |
| 3  |                        |                     | consequences are being evaluated and say why         |     |
| 4  |                        |                     | appropriate.                                         |     |
| 5  |                        |                     |                                                      |     |
| 6  |                        |                     |                                                      |     |
| 7  |                        |                     |                                                      |     |
| 8  | Discount rate          | <a href="#">#9</a>  | Report the choice of discount rate(s) used for costs | 10  |
| 9  |                        |                     |                                                      |     |
| 10 |                        |                     | and outcomes and say why appropriate                 |     |
| 11 |                        |                     |                                                      |     |
| 12 |                        |                     |                                                      |     |
| 13 |                        |                     |                                                      |     |
| 14 | Choice of health       | <a href="#">#10</a> | Describe what outcomes were used as the              | NA  |
| 15 | outcomes               |                     | measure(s) of benefit in the evaluation and their    |     |
| 16 |                        |                     | relevance for the type of analysis performed         |     |
| 17 |                        |                     |                                                      |     |
| 18 |                        |                     |                                                      |     |
| 19 |                        |                     |                                                      |     |
| 20 |                        |                     |                                                      |     |
| 21 |                        |                     |                                                      |     |
| 22 | Measurement of         | <a href="#">#11</a> | Single study-based estimates: Describe fully the     | 4-6 |
| 23 | effectiveness          | <a href="#">a</a>   | design features of the single effectiveness study    |     |
| 24 |                        |                     | and why the single study was a sufficient source of  |     |
| 25 |                        |                     | clinical effectiveness data                          |     |
| 26 |                        |                     |                                                      |     |
| 27 |                        |                     |                                                      |     |
| 28 |                        |                     |                                                      |     |
| 29 |                        |                     |                                                      |     |
| 30 |                        |                     |                                                      |     |
| 31 |                        |                     |                                                      |     |
| 32 | Measurement of         | <a href="#">#11</a> | Synthesis-based estimates: Describe fully the        | NA  |
| 33 | effectiveness          | <a href="#">b</a>   | methods used for identification of included studies  |     |
| 34 |                        |                     | and synthesis of clinical effectiveness data         |     |
| 35 |                        |                     |                                                      |     |
| 36 |                        |                     |                                                      |     |
| 37 |                        |                     |                                                      |     |
| 38 |                        |                     |                                                      |     |
| 39 | Measurement and        | <a href="#">#12</a> | If applicable, describe the population and methods   | NA  |
| 40 | valuation of           |                     | used to elicit preferences for outcomes.             |     |
| 41 |                        |                     |                                                      |     |
| 42 |                        |                     |                                                      |     |
| 43 | preference based       |                     |                                                      |     |
| 44 | outcomes               |                     |                                                      |     |
| 45 |                        |                     |                                                      |     |
| 46 |                        |                     |                                                      |     |
| 47 |                        |                     |                                                      |     |
| 48 |                        |                     |                                                      |     |
| 49 | **Estimating resources |                     |                                                      |     |
| 50 |                        |                     |                                                      |     |
| 51 |                        |                     |                                                      |     |
| 52 | and costs **           |                     |                                                      |     |
| 53 |                        |                     |                                                      |     |
| 54 |                        |                     |                                                      |     |
| 55 |                        | <a href="#">#13</a> | Single study-based economic evaluation: Describe     | NA  |
| 56 |                        |                     |                                                      |     |
| 57 |                        | <a href="#">a</a>   | approaches used to estimate resource use             |     |
| 58 |                        |                     |                                                      |     |
| 59 |                        |                     |                                                      |     |
| 60 |                        |                     |                                                      |     |

associated with the alternative interventions.

Describe primary or secondary research methods for valuing each resource item in terms of its unit cost. Describe any adjustments made to approximate to opportunity costs

## Methods

|    |                       |                     |                                                                                                                                                                                                                                                                                                                      |                        |
|----|-----------------------|---------------------|----------------------------------------------------------------------------------------------------------------------------------------------------------------------------------------------------------------------------------------------------------------------------------------------------------------------|------------------------|
| 16 | Estimating resources  | <a href="#">#13</a> | Model-based economic evaluation: Describe approaches and data sources used to estimate resource use associated with model health states. Describe primary or secondary research methods for valuing each resource item in terms of its unit cost. Describe any adjustments made to approximate to opportunity costs. | 6-9                    |
| 17 | and costs             | <a href="#">b</a>   |                                                                                                                                                                                                                                                                                                                      |                        |
| 32 | Currency, price date, | <a href="#">#14</a> | Report the dates of the estimated resource quantities and unit costs. Describe methods for adjusting estimated unit costs to the year of reported costs if necessary. Describe methods for converting costs into a common currency base and the exchange rate.                                                       | 9                      |
| 33 | and conversion        |                     |                                                                                                                                                                                                                                                                                                                      |                        |
| 47 | Choice of model       | <a href="#">#15</a> | Describe and give reasons for the specific type of decision analytical model used. Providing a figure to show model structure is strongly recommended.                                                                                                                                                               | Supplementary figure 1 |
| 54 | Assumptions           | <a href="#">#16</a> | Describe all structural or other assumptions underpinning the decision-analytical model.                                                                                                                                                                                                                             | 9                      |

|    |                    |                     |                                                      |    |
|----|--------------------|---------------------|------------------------------------------------------|----|
| 1  | Analytical methods | <a href="#">#17</a> | Describe all analytical methods supporting the       | 9  |
| 2  |                    |                     | evaluation. This could include methods for dealing   |    |
| 3  |                    |                     | with skewed, missing, or censored data;              |    |
| 4  |                    |                     | extrapolation methods; methods for pooling data;     |    |
| 5  |                    |                     | approaches to validate or make adjustments (such     |    |
| 6  |                    |                     | as half cycle corrections) to a model; and methods   |    |
| 7  |                    |                     | for handling population heterogeneity and            |    |
| 8  |                    |                     | uncertainty.                                         |    |
| 9  |                    |                     |                                                      |    |
| 10 |                    |                     |                                                      |    |
| 11 |                    |                     |                                                      |    |
| 12 |                    |                     |                                                      |    |
| 13 |                    |                     |                                                      |    |
| 14 |                    |                     |                                                      |    |
| 15 |                    |                     |                                                      |    |
| 16 |                    |                     |                                                      |    |
| 17 |                    |                     |                                                      |    |
| 18 |                    |                     |                                                      |    |
| 19 |                    |                     |                                                      |    |
| 20 | <b>Results</b>     |                     |                                                      |    |
| 21 |                    |                     |                                                      |    |
| 22 |                    |                     |                                                      |    |
| 23 | Study parameters   | <a href="#">#18</a> | Report the values, ranges, references, and, if used, | 11 |
| 24 |                    |                     | probability distributions for all parameters. Report |    |
| 25 |                    |                     | reasons or sources for distributions used to         |    |
| 26 |                    |                     | represent uncertainty where appropriate. Providing   |    |
| 27 |                    |                     | a table to show the input values is strongly         |    |
| 28 |                    |                     | recommended.                                         |    |
| 29 |                    |                     |                                                      |    |
| 30 |                    |                     |                                                      |    |
| 31 |                    |                     |                                                      |    |
| 32 |                    |                     |                                                      |    |
| 33 |                    |                     |                                                      |    |
| 34 |                    |                     |                                                      |    |
| 35 |                    |                     |                                                      |    |
| 36 |                    |                     |                                                      |    |
| 37 |                    |                     |                                                      |    |
| 38 | Incremental costs  | <a href="#">#19</a> | For each intervention, report mean values for the    | 11 |
| 39 |                    |                     | main categories of estimated costs and outcomes      |    |
| 40 | and outcomes       |                     | of interest, as well as mean differences between     |    |
| 41 |                    |                     | the comparator groups. If applicable, report         |    |
| 42 |                    |                     | incremental cost-effectiveness ratios.               |    |
| 43 |                    |                     |                                                      |    |
| 44 |                    |                     |                                                      |    |
| 45 |                    |                     |                                                      |    |
| 46 |                    |                     |                                                      |    |
| 47 |                    |                     |                                                      |    |
| 48 |                    |                     |                                                      |    |
| 49 |                    |                     |                                                      |    |
| 50 | Characterising     | <a href="#">#20</a> | Single study-based economic evaluation: Describe     | NA |
| 51 |                    |                     | the effects of sampling uncertainty for the          |    |
| 52 | uncertainty        | <a href="#">a</a>   | estimated incremental cost and incremental           |    |
| 53 |                    |                     | effectiveness parameters, together with the impact   |    |
| 54 |                    |                     |                                                      |    |
| 55 |                    |                     |                                                      |    |
| 56 |                    |                     |                                                      |    |
| 57 |                    |                     |                                                      |    |
| 58 |                    |                     |                                                      |    |
| 59 |                    |                     |                                                      |    |
| 60 |                    |                     |                                                      |    |

of methodological assumptions (such as discount rate, study perspective).

|    |                       |                     |                                                       |
|----|-----------------------|---------------------|-------------------------------------------------------|
| 1  |                       |                     |                                                       |
| 2  |                       |                     |                                                       |
| 3  |                       |                     |                                                       |
| 4  |                       |                     |                                                       |
| 5  |                       |                     |                                                       |
| 6  | Characterising        | <a href="#">#20</a> | Model-based economic evaluation: Describe the         |
| 7  |                       |                     |                                                       |
| 8  | uncertainty           | <a href="#">b</a>   | effects on the results of uncertainty for all input   |
| 9  |                       |                     |                                                       |
| 10 |                       |                     | parameters, and uncertainty related to the structure  |
| 11 |                       |                     |                                                       |
| 12 |                       |                     | of the model and assumptions.                         |
| 13 |                       |                     |                                                       |
| 14 |                       |                     |                                                       |
| 15 | Characterising        | <a href="#">#21</a> | If applicable, report differences in costs, outcomes, |
| 16 |                       |                     |                                                       |
| 17 | heterogeneity         |                     | or cost effectiveness that can be explained by        |
| 18 |                       |                     |                                                       |
| 19 |                       |                     | variations between subgroups of patients with         |
| 20 |                       |                     |                                                       |
| 21 |                       |                     | different baseline characteristics or other observed  |
| 22 |                       |                     |                                                       |
| 23 |                       |                     | variability in effects that are not reducible by more |
| 24 |                       |                     |                                                       |
| 25 |                       |                     | information.                                          |
| 26 |                       |                     |                                                       |
| 27 |                       |                     |                                                       |
| 28 |                       |                     |                                                       |
| 29 |                       |                     |                                                       |
| 30 | <b>Discussion</b>     |                     |                                                       |
| 31 |                       |                     |                                                       |
| 32 |                       |                     |                                                       |
| 33 | Study findings,       | <a href="#">#22</a> | Summarise key study findings and describe how         |
| 34 |                       |                     |                                                       |
| 35 | limitations,          |                     | they support the conclusions reached. Discuss         |
| 36 |                       |                     |                                                       |
| 37 | generalisability, and |                     | limitations and the generalisability of the findings  |
| 38 |                       |                     |                                                       |
| 39 | current knowledge     |                     | and how the findings fit with current knowledge.      |
| 40 |                       |                     |                                                       |
| 41 |                       |                     |                                                       |
| 42 |                       |                     |                                                       |
| 43 | <b>Other</b>          |                     |                                                       |
| 44 |                       |                     |                                                       |
| 45 |                       |                     |                                                       |
| 46 | Source of funding     | <a href="#">#23</a> | Describe how the study was funded and the role of     |
| 47 |                       |                     |                                                       |
| 48 |                       |                     | the funder in the identification, design, conduct,    |
| 49 |                       |                     |                                                       |
| 50 |                       |                     | and reporting of the analysis. Describe other non-    |
| 51 |                       |                     |                                                       |
| 52 |                       |                     | monetary sources of support                           |
| 53 |                       |                     |                                                       |
| 54 |                       |                     |                                                       |
| 55 |                       |                     |                                                       |
| 56 |                       |                     |                                                       |
| 57 |                       |                     |                                                       |
| 58 |                       |                     |                                                       |
| 59 |                       |                     |                                                       |
| 60 |                       |                     |                                                       |



1 Conflict of interest [#24](#) Describe any potential for conflict of interest of 23  
2  
3 study contributors in accordance with journal  
4 policy. In the absence of a journal policy, we  
5 recommend authors comply with International  
6 Committee of Medical Journal Editors  
7 recommendations  
8  
9  
10  
11  
12  
13  
14  
15

16 Notes:

- 17  
18  
19 • 15: Supplementary figure 1 The CHEERS checklist is distributed under the terms of the Creative  
20 Commons Attribution License CC-BY-NC. This checklist was completed on 20. August 2021  
21 using <https://www.goodreports.org/>, a tool made by the [EQUATOR Network](#) in collaboration with  
22 [Penelope.ai](#)  
23  
24  
25  
26  
27  
28  
29  
30  
31  
32  
33  
34  
35  
36  
37  
38  
39  
40  
41  
42  
43  
44  
45  
46  
47  
48  
49  
50  
51  
52  
53  
54  
55  
56  
57  
58  
59  
60
