# Supplementary material for: Societal economic burden of hypertension at selected hospitals in southern Ethiopia: a patient-level analysis
Source: PubMed Central journal article supplement — BMJ Open. 2022 Apr 6;12(4):e056627. doi: 10.1136/bmjopen-2021-056627 (PMC8987749; doi:10.1136/bmjopen-2021-056627), 2022-04-06
Supplement: bmjopen-2021-056627supp001.pdf [file bmjopen-2021-056627supp001.pdf]

**Supplementary materials:** Economic burden of hypertension at selected Hospitals in Southern Ethiopia; a patient level analysis

### Cardiovascular disease policy model

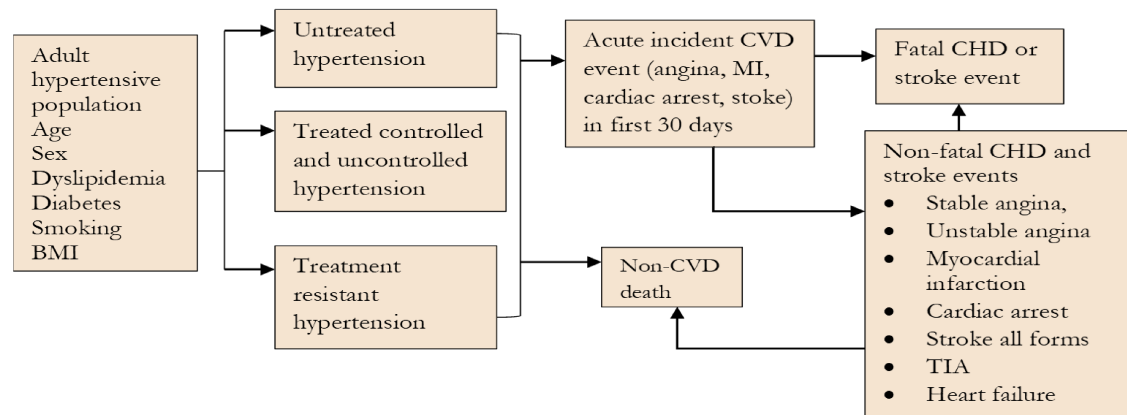

**Supplementary Figure 1:** Cardiovascular disease policy model adapted for Sub-Saharan African perspective (1).

**Supplementary Table 1:** Age and sex specific distribution of Ethiopian population 2020 estimate, prevalence of hypertension and adult mortality rate

| Age structure                     | Male              | Female            | Total              | Estimated prevalence of hypertension | Mortality rate |         | Data Source |
|-----------------------------------|-------------------|-------------------|--------------------|--------------------------------------|----------------|---------|-------------|
|                                   |                   |                   |                    |                                      | Men            | Women   |             |
| <b>Prevalence of hypertension</b> |                   |                   |                    |                                      |                |         | (2-8)       |
| 0-14 years                        | 21,657,152        | 21,381,628        | 43,038,780         | NA                                   | -              | -       |             |
| 15-19                             | 5,572,330         | 5,464,174         | 11,036,504         | 19.6                                 | 0.00286        | 0.00222 |             |
| 20-24                             | 5,930,683         | 5,816,173         | 11,746,856         | 19.6                                 | 0.00319        | 0.00223 |             |
| 25-29                             | 4,889,739         | 4,802,450         | 9,692,189          | 19.6                                 | 0.00293        | 0.00232 |             |
| 30-34                             | 3,761,349         | 3,757,544         | 7,518,893          | 23.0                                 | 0.00397        | 0.00368 |             |
| 35-39                             | 3,091,148         | 3,182,837         | 6,273,985          | 23.0                                 | 0.00411        | 0.00222 |             |
| 40-44                             | 2,445,523         | 2,488,422         | 4,933,945          | 25.9                                 | 0.00584        | 0.00385 |             |
| 45-49                             | 2,071,480         | 2,033,228         | 4,104,708          | 25.9                                 | 0.00360        | 0.00457 |             |
| 50-54                             | 1,567,789         | 1,660,957         | 3,228,746          | 41.9                                 | 0.00354        | 0.00274 |             |
| 55-59                             | 1,159,002         | 1,316,318         | 2,475,320          | 41.9                                 | 0.00354        | 0.00274 |             |
| 60-64                             | 946,594           | 1,109,670         | 2,056,264          | 41.9                                 | 0.00354        | 0.00274 |             |
| ≥ 65 years                        | 1,676,478         | 1,977,857         | 3,654,335          | 41.9                                 | 0.00354        | 0.00274 |             |
| <b>Total</b>                      | <b>54,769,267</b> | <b>54,991,258</b> | <b>109,760,525</b> |                                      |                |         |             |
|                                   |                   |                   |                    | Prevalence of untreated hypertension |                |         |             |
| For all ages (15 +)               |                   |                   |                    | 13.25                                |                |         | (9)         |

**Supplementary Table 2.** Model Parameters, Cohort Setting, and Probability of Transition between states and Disability weights for hypertension and related complications the Global Burden of Disease 2013 study and WHO Global Health Estimates

| Parameter                                                          | Data                                             | Source         |
|--------------------------------------------------------------------|--------------------------------------------------|----------------|
| Relative risk of hypertension treatment                            |                                                  |                |
| Relative risk of CHD event on hypertension treatment               | 0.683 (95% CI, 0.633–0.717)                      | (10-13)        |
| Relative risk of a cerebrovascular event on hypertension treatment | 0.633 (95% CI, 0.526–0.717)                      | (14)           |
| Relative risk of CHD event on normotensive men and women           | 0.49 (95% CI 0.458–0.513) and 0.32 (0.292–0.342) | (15)           |
| <b>Transition probabilities to death</b>                           |                                                  |                |
| <b>Health state</b>                                                | <b>Disability weight Estimate</b>                | <b>Source</b>  |
| <b>Hypertension</b>                                                |                                                  | <b>(16)</b>    |
| Treated                                                            | 0.246                                            |                |
| Untreated                                                          | 0.323                                            |                |
| Treated and controlled                                             | 0.171                                            |                |
| <b>Myocardial Infarction (MI)</b>                                  |                                                  | <b>(17)</b>    |
| Day 1-2                                                            | 0.432                                            |                |
| Days 3-28                                                          | 0.074                                            |                |
| <b>Angina Pectoris</b>                                             |                                                  |                |
| Mild                                                               | 0.033                                            |                |
| Moderate                                                           | 0.080                                            |                |
| Severe                                                             | 0.167                                            |                |
| <b>Heart failure</b>                                               |                                                  |                |
| Mild                                                               | 0.041                                            |                |
| Moderate                                                           | 0.072                                            |                |
| <b>Diabetes, digestive, and genitourinary disease</b>              |                                                  |                |
| <b>Diabetes</b>                                                    | 0.015 (0.012 - 0.018)                            | <b>(18-20)</b> |
| <b>Treated</b>                                                     | 0.033                                            |                |
| <b>Untreated</b>                                                   | 0.012                                            |                |

|                                                 |                     |  |
|-------------------------------------------------|---------------------|--|
| Diabetic neuropathy                             | 0.133               |  |
| Chronic kidney disease (stage IV)               | 0.104               |  |
| End-stage renal disease: with kidney transplant | 0.024               |  |
| End-stage renal disease: on dialysis            | 0.571               |  |
| Disutility due to daily medication              | 0.049 (0.031–0.072) |  |
| <b>Acute Events</b>                             |                     |  |
| Myocardial Infarction                           | 0.432 (0.288–0.579) |  |
| Stroke                                          | 0.570 (0.377–0.707) |  |
| Occurrence of second or later CVD event         | 0.985 (0.992–0.989) |  |
| <b>Chronic States</b>                           |                     |  |
| Ischemic Heart Disease                          | 0.08 (0.02–0.24)    |  |
| Stroke                                          | 0.135 (0.01–0.437)  |  |
| Alive post 2+ CVD Events                        | 0.242 (0.11–0.437)  |  |

CHD, coronary heart disease; SMR, standardized mortality ratio. \*Age and sex dependent †Applied multiplicatively to general population age- and sex-dependent utilities; CHD= Angina pectoris, coronary insufficiency, myocardial infarction, or coronary death.

**Supplementary table 3:** Simulation input parameters

| Input parameter                                              | Value                                                                                                                                                                                                             | Source                                                                                             |
|--------------------------------------------------------------|-------------------------------------------------------------------------------------------------------------------------------------------------------------------------------------------------------------------|----------------------------------------------------------------------------------------------------|
| Non-CVD death rate                                           | 0.005–0.176 (Age- and sex specific)#                                                                                                                                                                              | Calculated from WHO lifetables and GBD 2017 (21)                                                   |
| Probability of first-time cardiovascular disease (CVD) event | Individual risk characteristic specific                                                                                                                                                                           | Obtained from the Globorisk Office Calculator standardized for India [25]                          |
| <b>Acute CVD events</b>                                      |                                                                                                                                                                                                                   |                                                                                                    |
| MI                                                           |                                                                                                                                                                                                                   |                                                                                                    |
| Probability of MI if CVD event occurs                        | 37.6– 66.7% (Age- and sex specific)#                                                                                                                                                                              | Calculated based on GBD 2017(21)                                                                   |
| 30-day fatality                                              | 0.01–0.13 (Age- and sex-specific)#                                                                                                                                                                                | Calibrated based on findings of Huffman et al. 2018 (22)                                           |
| Re-infarction (in 30 days)                                   | 0.0120 (0.0099–0.0141)ψ                                                                                                                                                                                           | ACS QUIK Study by Huffman et al. 2018 (22)                                                         |
| Acute Stroke (in 30 days)                                    | 0.0060 (0.0045–0.0075)ψ                                                                                                                                                                                           | ACS QUIK Study by Huffman et al. 2018 (22)                                                         |
| Stroke                                                       |                                                                                                                                                                                                                   |                                                                                                    |
| Probability of Stroke if CVD event occurs                    | 33.2–62.3% (Age- and sex specific)#                                                                                                                                                                               | Calculated based on GBD 2017 (21) And Jushua D. Bundry et al(23)                                   |
| 30-day fatality                                              | 0.12, 0.13 (Sex-specific)#                                                                                                                                                                                        | Calibrated based on a multi-site study by Pandian and Sudhan 2013 [30]                             |
| Repeat Stroke (in 30 days)                                   | 0.15 (0.1–0.2)ψ                                                                                                                                                                                                   | Petty et al. 1998 (24)                                                                             |
| Sudden cardiac death                                         | 0.10 per 100 patient-years (95% CI, 0.07–0.14) in a cohort of 33 of 3242 untreated hypertensive patients without evidence of coronary or cerebrovascular HD at entry and followed up for an average of 10.3 years | Heart disease and stroke statistics 2021 update                                                    |
| <b>Heart failure</b>                                         |                                                                                                                                                                                                                   |                                                                                                    |
| Probability of AHF                                           |                                                                                                                                                                                                                   |                                                                                                    |
| 30-days fatality                                             | 0.0945                                                                                                                                                                                                            | Obtained from the THESUS-HF registry (25) and Korean Acute Heart Failure Registry (KorAHF)(26, 27) |

|                                                                         |                                            |                                                                                                                                                                                                                              |
|-------------------------------------------------------------------------|--------------------------------------------|------------------------------------------------------------------------------------------------------------------------------------------------------------------------------------------------------------------------------|
| Re-hospitalization                                                      | 0.0736                                     | Obtained from the THESUS-HF registry (25)                                                                                                                                                                                    |
| <b>Chronic events</b>                                                   |                                            |                                                                                                                                                                                                                              |
| Monthly risk of mortality                                               | 0.001–0.019 (Age- and sex-specific)#       | Calibrated based on GBD 2017 (21)                                                                                                                                                                                            |
| Reinfarction                                                            | 0.079 (0.073–0.085)ψ                       | Based on Steg et al. 2007 (28) and derived by Lin et al. 2019 (20)                                                                                                                                                           |
| Acute Stroke                                                            | 0.014 (0.012–0.016)ψ                       | Based on Steg et al. 2007 (28) and derived by Lin et al. 2019 (20)<br>Continue Or Stop post-Stroke Antihypertensives Collaborative Study (COSSACS) (29), BP reduction and secondary stroke prevention: systematic review(30) |
| <b>Stroke</b>                                                           |                                            |                                                                                                                                                                                                                              |
| Monthly risk of mortality                                               | 0.001–0.013 (Age- and sex specific)#       | Calibrated based on GBD 2017 (21)<br><br>Stroke Risk in Treated Hypertension Based on Home Blood Pressure: the Ohasama Study(31)                                                                                             |
| Acute MI                                                                | 0.043 (0.038–0.048)ψ                       | Based on Steg et al. 2007 (28) and derived by Lin et al. 2019 (20)                                                                                                                                                           |
| Acute Stroke                                                            | 0.037 (0.033–0.041)                        | Based on Steg et al. 2007 (28) and derived by Lin et al. 2019 (20)                                                                                                                                                           |
| Relative risk of fatality for an individual with two or more CVD events | 1.5                                        | Smolina et al. 2012 (32)                                                                                                                                                                                                     |
| <b>Heart failure</b>                                                    |                                            |                                                                                                                                                                                                                              |
| <b>Incidence</b>                                                        |                                            | Bulter J. et al (33, 34), and Davis BRK. et. al (35)                                                                                                                                                                         |
| 1 year mortality                                                        |                                            |                                                                                                                                                                                                                              |
| Re-hospitalization                                                      |                                            | <b>Moita B.eta al. 2019(36) and (37)</b>                                                                                                                                                                                     |
| <b>Effect of antihypertensive medication</b>                            |                                            |                                                                                                                                                                                                                              |
| Medication protocol for an individual                                   | Initial SBP-specific#                      | Based on Ethiopian NCD control guideline                                                                                                                                                                                     |
| IHD relative risk due to medication                                     | 0.32–0.89 (Age- and initial SBP-specific)# | Based on findings by Law et al. 2009 (38) and Asayam Kei., 2017(39)                                                                                                                                                          |
| Stroke relative risk due to medication                                  | 0.20–0.89 (Age- and initial SBP-specific)# | Based on findings by Law et al. 2009(38)                                                                                                                                                                                     |
| IHD relative risk if partially adherent                                 | 0.66–0.95 (Age- and initial SBP-specific)  | Calculated based on a linear relationship between adherence and efficacy as considered by Cherry et al. 2009(40)                                                                                                             |
| Stroke relative risk if partially adherent                              | 0.60–0.95 (Age- and initial SBP-specific)  | Calculated based on a linear relationship between adherence and efficacy as considered by Cherry et al. 2009 (40) and Lisheng Liu, Zengwu Wang. et al(41)                                                                    |

**Supplementary Table 4:** Price of drugs, medical supplies, procedures and professional time used for management of hypertension in Southern Ethiopia, January, 2021

| List of medicines                                                                                        | Unit   | Price in 2021 Ethiopian birr |                   | Price USD                | Source                                                                                                                                 |
|----------------------------------------------------------------------------------------------------------|--------|------------------------------|-------------------|--------------------------|----------------------------------------------------------------------------------------------------------------------------------------|
|                                                                                                          |        | Wholesale price              | Retail price      | Retail Price in 2021 USD |                                                                                                                                        |
| Acetylsalicylic Acid - 81mg – Tablet (coated)                                                            | 10x10  | 43.72                        | 1.32              | 1.303                    | Ethiopian Pharmaceutical supply agency, Arba Minch Hub wholesale price 2021 and Arba Minch General hospital pharmacy retail price 2021 |
| Adrenaline (Epinephrine)-0.1% in 1mL ampoule                                                             | Each   | 36.032                       | 1.09              | 1.074                    |                                                                                                                                        |
| Amiodarone - 100mg – Tablet                                                                              | 10x3   | 313.34                       | 9.44              | 9.337                    |                                                                                                                                        |
| Amlodipine - 10mg - Tablet                                                                               | 10x10  | 105.44                       | 3.18              | 3.142                    |                                                                                                                                        |
| Amlodipine - 5mg – Tablet                                                                                | 10x10  | 75.26                        | 2.27              | 2.243                    |                                                                                                                                        |
| Atenolol - 50mg – Tablet                                                                                 | 10x10  | 58.70                        | 1.77              | 1.749                    |                                                                                                                                        |
| Atorvastatin - 20mg – Tablet                                                                             | 10x10  | 195.68                       | 5.89              | 5.831                    |                                                                                                                                        |
| Atorvastatin - 40mg – Tablet                                                                             | 10x3   | 140.76                       | 4.24              | 4.195                    |                                                                                                                                        |
| Beclomethasone Propionate -100mcg/dose – Aerosol                                                         | 200 MD | 131.85                       | 3.97              | 3.929                    |                                                                                                                                        |
| Candesartan - 8mg – Tablet                                                                               | 14x2   | 152.63                       | 4.60              | 4.548                    |                                                                                                                                        |
| Captopril - 12.5mg – Tablet                                                                              | 10x10  | 33.54                        | 1.01              | 1.000                    |                                                                                                                                        |
| Captopril - 25mg – Tablet                                                                                | 10x10  | 26.91                        | 0.81              | 0.802                    |                                                                                                                                        |
| Dexamethasone - 4mg/ml in 1ml Ampoule - Injection                                                        | 10     | 3.95                         | 0.12              | 0.118                    |                                                                                                                                        |
| Captopril + HCT (50mg + 25mg)-Tablet                                                                     | 10x10  | 57.32                        | 1.73              | 1.708                    |                                                                                                                                        |
| Digoxin - 0.25mg – Tablet                                                                                | 10x10  | 202.18                       | 6.09              | 6.025                    |                                                                                                                                        |
| Enalapril Maleate - 10mg - Tablet                                                                        | 10x10  | 61.57                        | 1.85              | 1.835                    |                                                                                                                                        |
| Enalapril Maleate - 5mg – Tablet                                                                         | 10x10  | 63.92                        | 1.93              | 1.905                    |                                                                                                                                        |
| Enalapril Maleate – 2.5mg – Tablet                                                                       | 10x10  | 19.98                        | 0.60              | 0.595                    |                                                                                                                                        |
| Enalapril Maleate +HCT (10 mg + 25 mg)-tablet                                                            | 10x10  | 78.22                        | 2.36              | 2.331                    |                                                                                                                                        |
| Glibenclamide - 5mg – Tablet                                                                             | 10x10  | 39.09                        | 1.18              | 1.165                    |                                                                                                                                        |
| Glucose 40% in 20 mL – IV infusion                                                                       | Each   | 2.54                         | 0.08              | 0.076                    |                                                                                                                                        |
| Glyceryl Trinitrate - 0.4mg – Tablet (Sublingual)                                                        | 100    | 487.21                       | 14.67             | 14.518                   |                                                                                                                                        |
| Hydralazine - 20mg/ml in 1ml ampoule - Injection                                                         | 5      | 204.01                       | 6.14              | 6.079                    |                                                                                                                                        |
| Hydrochlorothiazide - 25mg – Tablet                                                                      | 25x4   | 48.05                        | 1.45              | 1.432                    |                                                                                                                                        |
| Insulin Isophane Biphasic (Soluble/Isophane Mixture)- (30 + 70)IU/ml in 10ml Vial -Injection(Suspension) | Each   | 85.20                        | 2.57              | 2.539                    |                                                                                                                                        |
| Insulin Isophane Human - 100IU/ml in 10ml Vial - Injection(Suspension)                                   | Each   | 100.28                       | 3.02              | 2.988                    |                                                                                                                                        |
| Insulin Soluble Human - 100IU/ml in 10ml Vial                                                            | Each   | 106.21                       | 3.20              | 3.165                    |                                                                                                                                        |
| Lovastatin - 20mg – Tablet                                                                               | 10x10  | 84.59                        | 2.55              | 2.521                    |                                                                                                                                        |
| Metformin - 500mg – Tablet                                                                               | 10     | 27.78                        | 0.84              | 0.828                    |                                                                                                                                        |
| Methyldopa - 250mg – Tablet                                                                              | 100x10 | 51.75                        | 1.56              | 1.542                    |                                                                                                                                        |
| Metoprolol - 50mg – Tablet                                                                               | 10x10  | 94.43                        | 2.84              | 2.814                    |                                                                                                                                        |
| Morphine sulphate-30mg-tablet                                                                            | 110    | 410.71                       | 12.37             | 12.239                   |                                                                                                                                        |
| Nifedipine - 20mg – Tablet                                                                               | 10x10  | 58.70                        | 1.77              | 1.749                    |                                                                                                                                        |
| Prednisolone - 5 mg – Tablet                                                                             | 100x10 | 342.23                       | 10.31             | 10.198                   |                                                                                                                                        |
| Propranolol - 40mg – Tablet                                                                              | 10x10  | 67.54                        | 2.03              | 2.013                    |                                                                                                                                        |
| Propylthiouracil - 100mg - Tablet (Scored)                                                               | 100    | 633.87                       | 19.09             | 18.889                   |                                                                                                                                        |
| Salbutamol - 0.1mg/dose - Aerosol (Oral Inhalation)                                                      | 200 MD | 117.20                       | 3.53              | 3.492                    |                                                                                                                                        |
| Spiroolactone - 25mg – Tablet                                                                            | 10x10  | 81.87                        | 2.47              | 2.440                    |                                                                                                                                        |
| Thyroxin Sodium - 0.1mg – Tablet                                                                         | 100    | 178.49                       | 5.38              | 5.319                    |                                                                                                                                        |
| Valsartan + HCT (80mg +12.5mg)                                                                           | 7*2    | 38.47                        | 1.16              | 1.146                    |                                                                                                                                        |
| <b>Laboratory and imaging costs</b>                                                                      |        | <b>Price per test ETB</b>    | Price in 2021 USD |                          |                                                                                                                                        |
| CBC                                                                                                      |        | 75.00                        |                   | 1.72                     | Arba Minch General Hospital Laboratory service price 2021                                                                              |
| FBG/RBS                                                                                                  |        | 20.00                        |                   | 0.46                     |                                                                                                                                        |
| Lipid profile (LDL, HDL, Total cholesterol, Triglyceride)                                                |        | 160.00                       |                   | 3.68                     |                                                                                                                                        |
| ECG                                                                                                      |        | 120.00                       |                   | 2.76                     |                                                                                                                                        |
| ECO                                                                                                      |        | 350.00                       |                   | 8.05                     |                                                                                                                                        |
| CT-scan                                                                                                  |        | 1200                         |                   | 27.59                    |                                                                                                                                        |
| RFT (bilirubin, creatinine)                                                                              |        | 80.00                        |                   | 1.84                     |                                                                                                                                        |
| Chest-ray                                                                                                |        | 726                          |                   | 16.69                    |                                                                                                                                        |
| Urine analysis                                                                                           |        | 15.00                        |                   | 0.34                     |                                                                                                                                        |
| Body fluid analysis                                                                                      |        | 100.00                       |                   | 2.30                     |                                                                                                                                        |
| H. pylori                                                                                                |        | 50.00                        |                   | 1.15                     |                                                                                                                                        |

|                                                                                     |                                                                 |                                                                                                                                             |                                  |
|-------------------------------------------------------------------------------------|-----------------------------------------------------------------|---------------------------------------------------------------------------------------------------------------------------------------------|----------------------------------|
| Liver function test (AST, ALT, ALP)                                                 | 120.00                                                          | 2.76                                                                                                                                        |                                  |
| Thyroid function test (T3, T4, TSH)                                                 | 432.00                                                          | 9.93                                                                                                                                        |                                  |
| <b>Hospital bed days</b>                                                            |                                                                 |                                                                                                                                             |                                  |
| Primary hospital                                                                    | 52.52                                                           | 1.21                                                                                                                                        | WHO Choice (42) inflated to 2021 |
| Secondary hospital                                                                  | 54.76                                                           | 1.26                                                                                                                                        |                                  |
| Tertiary hospital                                                                   | 70.81                                                           | 1.63                                                                                                                                        |                                  |
| <b>Health facility visit</b>                                                        |                                                                 | 0.00                                                                                                                                        |                                  |
| Primary hospital                                                                    | 18.58                                                           | 0.43                                                                                                                                        |                                  |
| Secondary hospital                                                                  | 21.17                                                           | 0.49                                                                                                                                        |                                  |
| Tertiary hospital                                                                   | 22.06                                                           | 0.51                                                                                                                                        |                                  |
| Health center visit                                                                 | 23.00                                                           | 0.53                                                                                                                                        |                                  |
| PCI intervention                                                                    | 63,000.00                                                       | 1448.28                                                                                                                                     |                                  |
| In-patient costs for MI                                                             | 45240.00                                                        | 1040.00                                                                                                                                     |                                  |
| In-patient costs for Stroke                                                         | 40890.00                                                        | 940.00                                                                                                                                      |                                  |
| Outpatient cost for IHD (per annum)                                                 | 1957.50                                                         | 45.00                                                                                                                                       |                                  |
| Outpatient cost for Stroke (per annum)                                              | 2914.50                                                         | 67.00                                                                                                                                       |                                  |
| <b>Salary scale of human resource</b>                                               |                                                                 | 0.00                                                                                                                                        |                                  |
| Physician                                                                           | 21,100.00                                                       | 485.06                                                                                                                                      | MOH, Ethiopia 2012/2019          |
| Acute care nurse                                                                    | 7470.00                                                         | 171.72                                                                                                                                      |                                  |
| Pharmacy personnel                                                                  | 8047.00                                                         | 184.99                                                                                                                                      |                                  |
| Laboratory technician                                                               | 6460.00                                                         | 148.51                                                                                                                                      |                                  |
| Program cost per person per annum                                                   | 993.29                                                          | 22.83                                                                                                                                       |                                  |
| <b>Antihypertensive treatment</b>                                                   |                                                                 |                                                                                                                                             | (43).                            |
| Antihypertensive medication (per individual per annum)                              | Drug costs based on national Drug supply agency wholesale price |                                                                                                                                             |                                  |
| Out-patient consultations (per visit)                                               | <b>\$43.36</b>                                                  | Annual outpatient visit cost (12*WHO cost per outpatient visit inflated to 2021) WHO Choice (42)                                            |                                  |
| One-time diagnostic tests                                                           |                                                                 | Based on Laboratory procedures and test price of Arba Minch General Hospital, 2021                                                          |                                  |
| In-patient costs for MI                                                             | \$1040                                                          | WHO Choice (42) inflated to 2021                                                                                                            |                                  |
| In-patient costs for Stroke                                                         | \$940                                                           |                                                                                                                                             |                                  |
| <b>Chronic CVD care</b>                                                             |                                                                 |                                                                                                                                             |                                  |
| Secondary care medication in public sector (per individual per annum)               | \$92, \$184 (Dosage-specific)§                                  | MSH-2015 International Drug Price Indicator inflated to 2021(25)                                                                            |                                  |
| Outpatient cost for IHD (per annum)                                                 | \$45                                                            | WHO Choice (44) inflated to 2021                                                                                                            |                                  |
| Outpatient cost for Stroke (per annum)                                              | \$67                                                            |                                                                                                                                             |                                  |
| Average inflation rate Ethiopia                                                     | 16.58%                                                          | <a href="https://take-profit.org/en/statistics/inflation-rate/ethiopia/">https://take-profit.org/en/statistics/inflation-rate/ethiopia/</a> |                                  |
| Average inflation rate foreign                                                      | 2.02%                                                           |                                                                                                                                             |                                  |
| Percentage change                                                                   | 24.6%                                                           |                                                                                                                                             |                                  |
| Exchange rate July 2021 (1USD)                                                      | 43.5 ETB                                                        |                                                                                                                                             |                                  |
| 1USD = 20.999 ETB in 2016 and 43.5 in 2021; PPP= 12.1/8.1 = 1.5                     |                                                                 |                                                                                                                                             |                                  |
| MD: metered Dose; MOH: Ministry of Health 1 USD = 43.5 January 2021                 |                                                                 |                                                                                                                                             |                                  |
| <b>Note:</b> 30% mark-up at regional EPSA hub, 31% mark-up at Public Hospital level |                                                                 |                                                                                                                                             |                                  |

**Supplementary Table 5:** Risk of death across age and gender covariate categories stratified for hypertension

| Variables                         | Categories           | Incidence of death (%) |                | Relative risk in each category (CI) | Source |
|-----------------------------------|----------------------|------------------------|----------------|-------------------------------------|--------|
|                                   |                      | High BP group          | Normal         |                                     |        |
| Age                               | 20-29                | 1.68%                  | 0.54%          | 3.11 (1.16-8.36)                    | (8)    |
|                                   | 30-39                | 1.71%                  | 0.94%          | 1.82 (1.04-3.19)                    |        |
|                                   | 40-49                | 2.43%                  | 1.88%          | 1.29 (0.91-1.82)                    |        |
|                                   | 50-59                | 6.30%                  | 4.03%          | 1.56 (1.28-1.91)                    |        |
|                                   | 60 and above         | 19.32%                 | 15.9%          | 1.21 (1.12-1.31)                    |        |
| Gender                            | Women                | 8.71%                  | 1.1%           | 3.31 (2.98-3.68)                    |        |
|                                   | Men                  | 15.47%                 | 4.62%          | 3.34(3.02-3.70)                     |        |
| <b>Risk of all case mortality</b> |                      |                        |                |                                     |        |
| Gender                            | Treatment status     | < 60 years             | > 60 years     | HR (95% CI)                         | (45)   |
| Men                               | Normal               | <b>0.0068</b>          | <b>0.0214</b>  | 1.00 (Reference)                    |        |
|                                   | Treated controlled   | <b>0.0188</b>          | <b>0.0305</b>  | 1.20 (0.92-1.57)                    |        |
|                                   | Treated uncontrolled | <b>0.0252</b>          | <b>0.0372</b>  | 1.55 (1.19-2.01)                    |        |
|                                   | Untreated            | <b>0.0197</b>          | <b>0.0336</b>  | 1.45 (1.23-1.72)                    |        |
| Women                             | Normal               | <b>0.00528</b>         | <b>0.01870</b> | 1.00 (Reference)                    |        |
|                                   | Treated controlled   | <b>0.01675</b>         | <b>0.02841</b> | 1.11 (0.84-1.47)                    |        |
|                                   | Treated uncontrolled | <b>0.02533</b>         | <b>0.03736</b> | 1.63 (1.34-1.99)                    |        |
|                                   | Untreated            | <b>0.02075</b>         | <b>0.03471</b> | 1.31 (1.06-1.61)                    |        |

**Supplementary Table 6:** Annual mortality rate in the total population, those with hypertension by treatment and control status and those without hypertension in Ethiopia in 2021 by age group and sex based on literature review of systematic reviews and clinical trials

| Age group    | Mortality rate in the total population | Mortality rate among people without hypertension | Mortality rate among people with treated and controlled hypertension | Mortality rate among people with treated but uncontrolled hypertension | Mortality rate among people with untreated hypertension | References                                                                      |
|--------------|----------------------------------------|--------------------------------------------------|----------------------------------------------------------------------|------------------------------------------------------------------------|---------------------------------------------------------|---------------------------------------------------------------------------------|
| <b>Women</b> |                                        |                                                  |                                                                      |                                                                        |                                                         |                                                                                 |
| 15-19        | 0.00222                                | 0.00222                                          | 0.016746                                                             | 0.025                                                                  | 0.02075                                                 | Ko, Min Jung. et al. 2016 (46), Mende Sorato, et al, 2021. (1, 23, 45, 47, 48). |
| 20-24        | 0.00223                                | 0.00223                                          | 0.016746                                                             | 0.025                                                                  | 0.02075                                                 |                                                                                 |
| 25-29        | 0.00232                                | 0.00232                                          | 0.016746                                                             | 0.025                                                                  | 0.02075                                                 |                                                                                 |
| 30-34        | 0.00368                                | 0.00368                                          | 0.016746                                                             | 0.025                                                                  | 0.02075                                                 |                                                                                 |
| 35-39        | 0.00222                                | 0.00222                                          | 0.016746                                                             | 0.025                                                                  | 0.02075                                                 |                                                                                 |
| 40-44        | 0.00385                                | 0.00385                                          | 0.016746                                                             | 0.025                                                                  | 0.02075                                                 |                                                                                 |
| 45-49        | 0.00457                                | 0.00457                                          | 0.016746                                                             | 0.025                                                                  | 0.02075                                                 |                                                                                 |
| 50-54        | 0.00182                                | 0.00182                                          | 0.016746                                                             | 0.025                                                                  | 0.02075                                                 |                                                                                 |
| 55-59        | 0.00182                                | 0.00182                                          | 0.016746                                                             | 0.025                                                                  | 0.02075                                                 |                                                                                 |
| 60-64        | 0.00441                                | 0.00441                                          | 0.028414                                                             | 0.037                                                                  | 0.03471                                                 |                                                                                 |
| <b>Men</b>   |                                        |                                                  |                                                                      |                                                                        |                                                         |                                                                                 |
| 15-19        | 0.00286                                | 0.00286                                          | 0.018783                                                             | 0.025                                                                  | 0.01969                                                 | Kuriakose A. et al. 2014. (8), EDHS, 2016 (7, 45, 47-50)                        |
| 20-24        | 0.00319                                | 0.00319                                          | 0.018783                                                             | 0.025                                                                  | 0.01969                                                 |                                                                                 |
| 25-29        | 0.00293                                | 0.00293                                          | 0.018783                                                             | 0.025                                                                  | 0.01969                                                 |                                                                                 |
| 30-34        | 0.00397                                | 0.00397                                          | 0.018783                                                             | 0.025                                                                  | 0.01969                                                 |                                                                                 |
| 35-39        | 0.00411                                | 0.00411                                          | 0.018783                                                             | 0.025                                                                  | 0.01969                                                 |                                                                                 |
| 40-44        | 0.00584                                | 0.00584                                          | 0.018783                                                             | 0.025                                                                  | 0.01969                                                 |                                                                                 |
| 45-49        | 0.0036                                 | 0.0036                                           | 0.018783                                                             | 0.025                                                                  | 0.01969                                                 |                                                                                 |
| 50-54        | 0.00354                                | 0.00354                                          | 0.018783                                                             | 0.025                                                                  | 0.01969                                                 |                                                                                 |
| 55-59        | 0.00354                                | 0.00354                                          | 0.018783                                                             | 0.025                                                                  | 0.01969                                                 |                                                                                 |
| 60-64        | 0.00354                                | 0.00354                                          | 0.030451                                                             | 0.037                                                                  | 0.03365                                                 |                                                                                 |



## References

1. Sorato MM, Davari M, Kebriaeezadeh A, Sarrafzadegan N, Shibru T, Fatemi B. Risk of fatal and nonfatal coronary heart disease and stroke events among adult patients with hypertension: basic Markov model inputs for evaluating cost-effectiveness of hypertension treatment: systematic review of cohort studies. *Journal of Pharmaceutical Health Services Research*. 2021;12(2).
2. Institute. EPH. Ethiopia steps report on risk factors for chronic non-communicable diseases and prevalence of selected NCDs. 2016.
3. Kelemu Tilahun Kibret, Mesfin YM. Prevalence of hypertension in Ethiopia: a systematic meta-analysis. *Public Health Reviews* 2015;36(14).
4. WHO. Non-communicable diseases country profiles 2018. Geneva: World Health Organization. 2018.
5. Helelo TP GY, Adane AA. Prevalence and Associated Factors of Hypertension among Adults in Durame Town, Southern Ethiopia. *PLoS ONE*. 2014;9(11):e112790.
6. Shukuri A, Tewelde T, Shaweno T. Prevalence of old age hypertension and associated factors among older adults in rural Ethiopia. *Integrated blood pressure control*. 2019;12:23-31.
7. ICF C. Ethiopia Demographic and Health Survey 2016, Addis Ababa, Ethiopia, and Rockville, Maryland, USA: CSA and ICF. DF-1.6.
8. Kuriakose A, Nair Anish TS, Soman B, Varghese RT, Sreelal TP, Mendez AM, et al. Rate and Risk of All Cause Mortality among People with Known Hypertension in a Rural Community of Southern Kerala, India: The Results from the Prolife Cohort. *Int J Prev Med*. 2014;5(5):596-603.
9. Getachew F DA, Solomon D. Prevalence of Undiagnosed Hypertension and Associated Factors among Residents in Gulele Sub-City, Addis Ababa, Ethiopia. *J Community Med Health Educ*. 2018;8(590).
10. Antikainen R, Jousilahti P, Tuomilehto J. Systolic blood pressure, isolated systolic hypertension and risk of coronary heart disease, strokes, cardiovascular disease and all-cause mortality in the middle-aged population. *Journal of hypertension*. 1998;16(5):577-83.
11. Ford ES, Giles WH, Mokdad AH. The distribution of 10-year risk for coronary heart disease among US adults: findings from the National Health and Nutrition Examination Survey III. *Journal of the American College of Cardiology*. 2004;43(10):1791-6.
12. Collaborators GRF. Global, regional, and national comparative risk assessment of 84 behavioural, environmental and occupational, and metabolic risks or clusters of risks for 195 countries and territories, 1990–2017: a systematic analysis for the Global Burden of Disease Study 2017. *Lancet (London, England)*. 2018;392(10159):1923.
13. Flint AC, Conell C, Ren X, Banki NM, Chan SL, Rao VA, et al. Effect of systolic and diastolic blood pressure on cardiovascular outcomes. *New England Journal of Medicine*. 2019;381(3):243-51.
14. Rapsomaniki E, Timmis A, George J, Pujades-Rodriguez M, Shah AD, Denaxas S, et al. Blood pressure and incidence of twelve cardiovascular diseases: lifetime risks, healthy life-years lost, and age-specific associations in 1·25 million people. *The Lancet*. 2014;383(9932):1899-911.
15. Lloyd-Jones DM, Larson MG, Beiser A, Levy D. Lifetime risk of developing coronary heart disease. *The Lancet*. 1999;353(9147):89-92.
16. Organization WH. Disability weights, discounting and age weighting of DALYs. Available; 2016.
17. Salomon JA, Haagsma JA, Davis A, de Noordhout CM, Polinder S, Havelaar AH, et al. Disability weights for the Global Burden of Disease 2013 study. *The Lancet Global Health*. 2015;3(11):e712-e23.
18. Vos T, Allen C, Arora M, Barber RM, Bhutta ZA, Brown A, et al. Global, regional, and national incidence, prevalence, and years lived with disability for 310 diseases and injuries, 1990–2015: a systematic analysis for the Global Burden of Disease Study 2015. *The Lancet*. 2016;388(10053):1545-602.
19. Salomon JA, Vos T, Hogan DR, Gagnon M, Naghavi M, Mokdad A, et al. Common values in assessing health outcomes from disease and injury: disability weights measurement study for the Global Burden of Disease Study 2010. *Lancet (London, England)*. 2012;380(9859):2129-43.
20. Lin JK, Moran AE, Bibbins-Domingo K, Falase B, Pedroza Tobias A, Mandke CN, et al. Cost-effectiveness of a fixed-dose combination pill for secondary prevention of cardiovascular disease in China, India, Mexico, Nigeria, and South Africa: a modelling study. *The Lancet Global health*. 2019;7(10):e1346-e58.

21. Global, regional, and national age-sex-specific mortality for 282 causes of death in 195 countries and territories, 1980-2017: a systematic analysis for the Global Burden of Disease Study 2017. *Lancet* (London, England). 2018;392(10159):1736-88.
22. Huffman MD, Mohanan PP, Devarajan R, Baldrige AS, Kondal D, Zhao L, et al. Effect of a Quality Improvement Intervention on Clinical Outcomes in Patients in India With Acute Myocardial Infarction: The ACS QUIK Randomized Clinical Trial. *Jama*. 2018;319(6):567-78.
23. Bundy JD, Li C, Stuchlik P, Bu X, Kelly TN, Mills KT, et al. Systolic Blood Pressure Reduction and Risk of Cardiovascular Disease and Mortality: A Systematic Review and Network Meta-analysis. *JAMA Cardiology*. 2017;2(7):775-81.
24. Petty GW, Brown RD, Jr., Whisnant JP, Sicks JD, O'Fallon WM, Wiebers DO. Survival and recurrence after first cerebral infarction: a population-based study in Rochester, Minnesota, 1975 through 1989. *Neurology*. 1998;50(1):208-16.
25. Health MSf. International Medical Products Price Guide: 2015 edition. 2015.
26. Lee SE, Lee HY, Cho HJ, Choe WS, Kim H, Choi JO, et al. Clinical Characteristics and Outcome of Acute Heart Failure in Korea: Results from the Korean Acute Heart Failure Registry (KorAHF). *Korean circulation journal*. 2017;47(3):341-53.
27. Choi DJ, Han S, Jeon ES, Cho MC, Kim JJ, Yoo BS, et al. Characteristics, outcomes and predictors of long-term mortality for patients hospitalized for acute heart failure: a report from the Korean heart failure registry. *Korean circulation journal*. 2011;41(7):363-71.
28. Steg PG, Bhatt DL, Wilson PWF, D'Agostino R, Ohman EM, Röther J, et al. One-Year Cardiovascular Event Rates in Outpatients With Atherothrombosis. *Jama*. 2007;297(11):1197-206.
29. Robinson TG, Potter JF, Ford GA, Bulpitt CJ, Chernova J, Jagger C, et al. Effects of antihypertensive treatment after acute stroke in the Continue Or Stop post-Stroke Antihypertensives Collaborative Study (COSSACS): a prospective, randomised, open, blinded-endpoint trial. *The Lancet Neurology*. 2010;9(8):767-75.
30. Katsanos AH, Filippatou A, Manios E, Deftereos S, Parissis J, Frogoudaki A, et al. Blood Pressure Reduction and Secondary Stroke Prevention. *Hypertension*. 2017;69(1):171-9.
31. Yasui D, Asayama K, Ohkubo T, Kikuya M, Kanno A, Hara A, et al. Stroke Risk in Treated Hypertension Based on Home Blood Pressure: the Ohasama Study. *American Journal of Hypertension*. 2010;23(5):508-14.
32. Smolina K, Wright FL, Rayner M, Goldacre MJ. Long-Term Survival and Recurrence After Acute Myocardial Infarction in England, 2004 to 2010. *Circulation: Cardiovascular Quality and Outcomes*. 2012;5(4):532-40.
33. Butler J, Kalogeropoulos AP, Georgiopoulou VV, Bibbins-Domingo K, Najjar SS, Sutton-Tyrrell KC, et al. Systolic blood pressure and incident heart failure in the elderly. *The Cardiovascular Health Study and the Health, Ageing and Body Composition Study*. *Heart*. 2011;97(16):1304.
34. Piller LB, Baraniuk S, Simpson LM, Cushman WC, Massie BM, Einhorn PT, et al. Long-term follow-up of participants with heart failure in the antihypertensive and lipid-lowering treatment to prevent heart attack trial (ALLHAT). *Circulation*. 2011;124(17):1811-8.
35. Davis BR, Kostis JB, Simpson LM, Black HR, Cushman WC, Einhorn PT, et al. Heart Failure With Preserved and Reduced Left Ventricular Ejection Fraction in the Antihypertensive and Lipid-Lowering Treatment to Prevent Heart Attack Trial. *Circulation*. 2008;118(22):2259-67.
36. Moita B, Marques AP, Camacho AM, Leão Neves P, Santana R. One-year rehospitalisations for congestive heart failure in Portuguese NHS hospitals: a multilevel approach on patterns of use and contributing factors. *BMJ open*. 2019;9(9):e031346.
37. Chamberlain AM, Dunlay SM, Gerber Y, Manemann SM, Jiang R, Weston SA, et al. Burden and Timing of Hospitalizations in Heart Failure: A Community Study. *Mayo Clinic proceedings*. 2017;92(2):184-92.
38. Law MR, Morris JK, Wald NJ. Use of blood pressure lowering drugs in the prevention of cardiovascular disease: meta-analysis of 147 randomised trials in the context of expectations from prospective epidemiological studies. *BMJ (Clinical research ed)*. 2009;338:b1665.
39. Asayama K. Observational study and participant-level meta-analysis on antihypertensive drug treatment-related cardiovascular risk. *Hypertension Research*. 2017;40(10):856-60.

40. Cherry SB, Benner JS, Hussein MA, Tang SSK, Nichol MB. The Clinical and Economic Burden of Nonadherence with Antihypertensive and Lipid-Lowering Therapy in Hypertensive Patients. *Value in Health*. 2009;12(4):489-97.
41. Liu L, Wang Z, Gong L, Zhang Y, Thijs L, Staessen JA, et al. Blood pressure reduction for the secondary prevention of stroke: a Chinese trial and a systematic review of the literature. *Hypertension Research*. 2009;32(11):1032-40.
42. Stenberg K, Lauer JA, Gkountouras G, Fitzpatrick C, Stanciole A. Econometric estimation of WHO-CHOICE country-specific costs for inpatient and outpatient health service delivery. *Cost Effectiveness and Resource Allocation*. 2018;16(1):11.
43. Health FMo. National strategic action plan (NSAP) for prevention & control of non-communicable diseases in Ethiopia, 2014-2016. 2014:43-7.
44. Organization WH. WHO-CHOICE Estimates of Cost for Inpatient and Outpatient Health Service Delivery.
45. Zhou D, Xi B, Zhao M, Wang L, Veeranki SP. Uncontrolled hypertension increases risk of all-cause and cardiovascular disease mortality in US adults: the NHANES III Linked Mortality Study. *Sci Rep*. 2018;8(1):9418.
46. Ko MJ, Jo AJ, Park CM, Kim HJ, Kim YJ, Park D-W. Level of blood pressure control and cardiovascular events: SPRINT criteria versus the 2014 hypertension recommendations. *Journal of the American College of Cardiology*. 2016;67(24):2821-31.
47. Gu Q, Dillon CF, Burt VL, Gillum RF. Association of Hypertension Treatment and Control With All-Cause and Cardiovascular Disease Mortality Among US Adults With Hypertension. *American Journal of Hypertension*. 2010;23(1):38-45.
48. Murakami Y, Hozawa A, Okamura T, Ueshima H. Relation of Blood Pressure and All-Cause Mortality in 180 000 Japanese Participants. *Hypertension*. 2008;51(6):1483-91.
49. Nagai K, Yamagata K, Iseki K, Moriyama T, Tsuruya K, Fujimoto S, et al. Antihypertensive treatment and risk of cardiovascular mortality in patients with chronic kidney disease diagnosed based on the presence of proteinuria and renal function: A large longitudinal study in Japan. *PLoS One*. 2019;14(12):e0225812.
50. Gudmundsson LS, Johannsson M, Thorgeirsson G, Sigfusson N, Sigvaldason H, Witteman JCM. Risk profiles and prognosis of treated and untreated hypertensive men and women in a population-based longitudinal study The Reykjavik Study. *Journal of Human Hypertension*. 2004;18(9):615-22.
